# Supplementary material for: Dual ligand-enabled iron and halogen-containing carboxylate-based photocatalysis for chloro/fluoro-polyhaloalkylation of alkenes
Source: Royal Society of Chemistry journal article supplement (doi:10.1039/d4sc04038d), 2024-01-01

## Supplementary Information

### Dual ligand-enabled iron and halogen-containing carboxylate-based photocatalysis for chloro/fluoro-polyhaloalkylation of alkenes

Wanru Han<sup>a†</sup>, Zhenyan Zhao<sup>a†</sup>, Kui Jiang<sup>a</sup>, Yu Lan<sup>a,b,c\*</sup>, Xuehan Yu<sup>a</sup>, Xiaoyu Jiang<sup>a</sup>, Wei Yang<sup>a</sup>, Donghui Wei<sup>a\*</sup>, Shi-Jun Li<sup>a,b\*</sup>,  
and Linbin Niu<sup>a,b\*</sup>

<sup>a</sup> College of Chemistry, and Pingyuan Laboratory, Zhengzhou University, 100 Science Avenue, Zhengzhou 450001, Henan

<sup>b</sup> State Key Laboratory of Antiviral Drugs, Pingyuan Laboratory, Henan Normal University, Xinxiang 453007, Henan

<sup>c</sup> School of Chemistry and Chemical Engineering, Chongqing Key Laboratory of Chemical Theory and Mechanism, Chongqing University, Chongqing 401331

\* Corresponding Authors: lanyu@cqu.edu.cn; donghuiwei@zzu.edu.cn; lishijunzong@zzu.edu.cn; nlb@zzu.edu.cn

† W. Han and Z. Zhao contributed equally to this work.

## Table of Contents

|                                                                                         |    |
|-----------------------------------------------------------------------------------------|----|
| 1. General information .....                                                            | 3  |
| 2. Preparation of substrates.....                                                       | 5  |
| 3. Experimental procedures for chloro/fluoro-polyhaloalkylation of alkenes.....         | 6  |
| 4. Mechanistic studies .....                                                            | 16 |
| 5. Data for products.....                                                               | 46 |
| 6. Reference .....                                                                      | 57 |
| 7. Copies of $^1\text{H}$ NMR, $^{13}\text{C}$ NMR and $^{19}\text{F}$ NMR Spectra..... | 58 |

## 1. General information

All reagents and catalysts were purchased from commercial sources and used without further purification, and all manipulations were carried out by standard Schlenk techniques. LEDs irradiation was accomplished using the photochemical reactors (Figure S1),  $\lambda_{\text{max}} = 450$  nm (Figure S2). Thin layer chromatography (TLC) employed glass 0.20 mm-0.25 mm silica gel plates. Purification of products was accomplished using flash chromatography on silica gel. All the new compounds were characterized by  $^1\text{H}$  NMR,  $^{13}\text{C}$  NMR,  $^{19}\text{F}$  NMR and ESI-HRMS. The known compounds were characterized by  $^1\text{H}$  NMR,  $^{13}\text{C}$  NMR,  $^{19}\text{F}$  NMR and ESI-HRMS. NMR spectra were recorded on a Bruker 400 instrument operating at 400, 101, and 376 MHz for  $^1\text{H}$  NMR,  $^{13}\text{C}$  NMR and  $^{19}\text{F}$  NMR respectively. Chemical shifts ( $\delta$ ) were reported in ppm, and coupling constants ( $J$ ) are in Hertz (Hz). Data was reported in ppm using  $\text{CDCl}_3$  ( $^1\text{H}$  NMR  $\delta$  7.26,  $^{13}\text{C}$  NMR  $\delta$  77.16) or  $\text{DMSO}-d_6$  ( $^1\text{H}$  NMR  $\delta$  2.50,  $^{13}\text{C}$  NMR  $\delta$  39.53) as solvent unless otherwise specified. High-resolution mass data was recorded on mass spectrometers in the ESI mode.

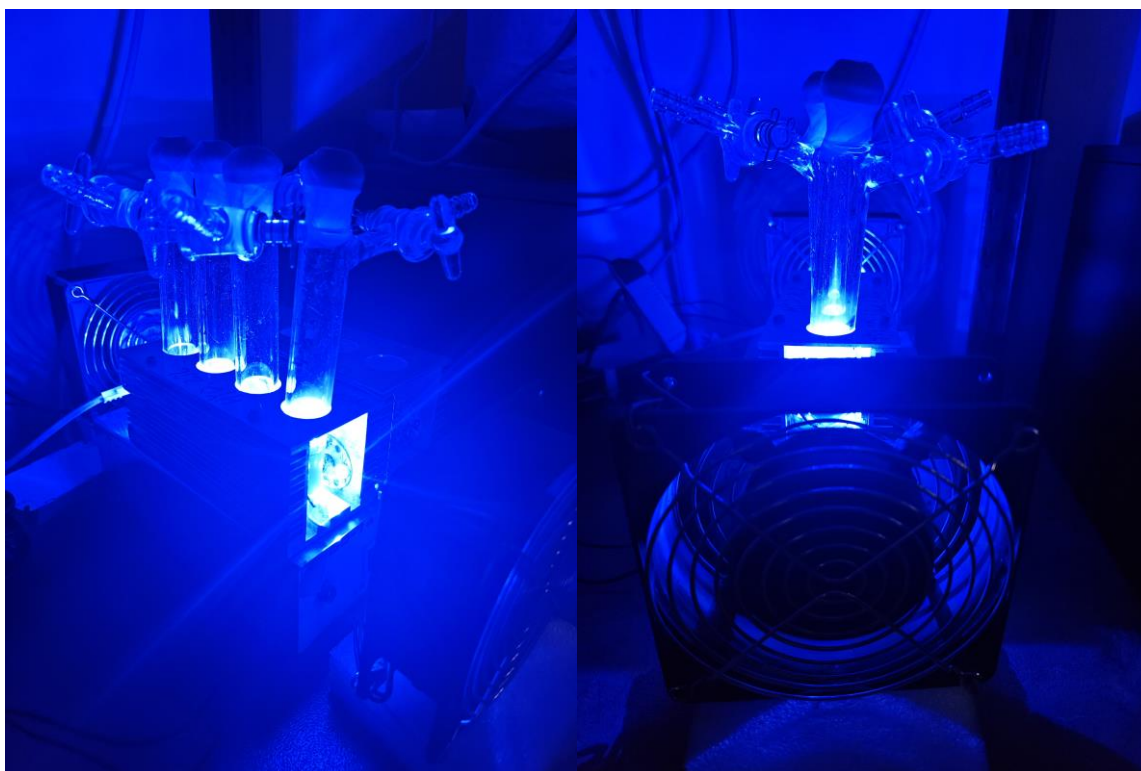

**Figure S1.** The photochemical reactors.

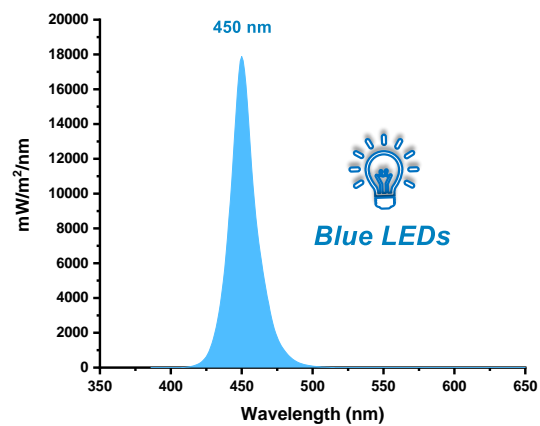

**Figure S2.** The wavelength spectrum of photochemical reactors.

## 2. Preparation of substrates

To the solution of the corresponding acid (3.0 mmol) in dry  $\text{CH}_2\text{Cl}_2$  (28.0 mL) was added dicyclohexylcarbodiimide (3.6 mmol), 4-dimethylaminopyridine (0.45 mmol) and alcohol (3.0 mmol). The reaction mixture was left stirring for 24 h. After full conversion, the precipitate was removed by filtration and the solvent was removed in vacuum. The residue was purified by silica gel column chromatography to afford the products (Figure S3).<sup>1</sup>

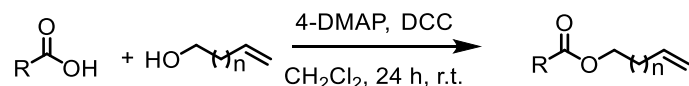

**Figure S3.** Method A for the synthesis of non-activated alkenes. DCC: Dicyclohexylcarbodiimide, 4-DMAP: 4-Dimethylaminopyridine.

To the solution of the corresponding phenol (0.5 mmol) and  $\text{K}_2\text{CO}_3$  (1.0 mmol) in acetone (20.0 mL) was added allyl bromide (0.6 mmol). The resulting mixture was then stirred at reflux for 12 h and then filtered through a celite pad and washed with EtOAc. The filtrate was concentrated and the residue was purified by silica gel column chromatography using petroleum ether/EtOAc as the eluent to afford the products (Figure S4).<sup>1</sup>

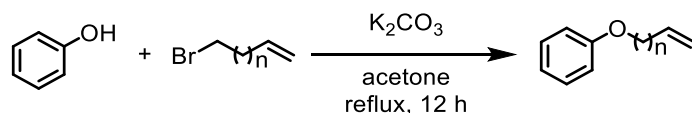

**Figure S4.** Method B for the synthesis of non-activated alkenes.

To the solution of the heterocycle derivative (5.0 mmol) and  $\text{K}_2\text{CO}_3$  (10.0 mmol) in acetone (15.0 mL) was added allyl bromide (6.0 mmol). Heat the reaction to 60 °C and stir for 2 h. After this time, quench the reaction with water. Extract the aqueous solution with ethyl acetone ( $\times 3$ ), then wash the combined organic layers with brine and dry over  $\text{Na}_2\text{SO}_4$ , and remove the organic solvent under reduced pressure. Subject the residue to flash column chromatography on silica gel with hexanes/ethyl acetate as the eluent to afford the products (Figure S5).<sup>2</sup>

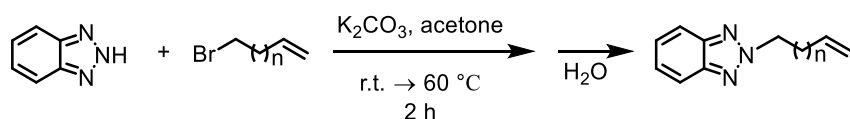

**Figure S5.** Method C for the synthesis of non-activated alkenes.

To a 50-mL Schlenk tube, iron(III) chloride (5.0 mmol) and silver trifluoroacetate (15.0 mmol) were dissolved in dichloroethane (15.0 mL) and reacted for 3 h at room temperature. The precipitate  $\text{AgCl}$  was filtered and the residue was washed with acetone. The corresponding filtrate was concentrated under reduced pressure and the resulting product was dried at 80 °C for 1 h. Iron(III) trifluoroacetate was obtained as red solid (Figure S6).<sup>3</sup>

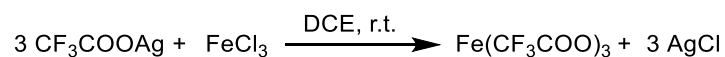

**Figure S6.** The synthesis of  $\text{Fe}(\text{CF}_3\text{COO})_3$ .

### 3. Experimental procedures for chloro/fluoro-polyhaloalkylation of alkenes

**General procedure for stoichiometric experiments:** A 25-mL Schlenk flask equipped with a magnetic bar was charged with  $\text{Fe}(\text{CF}_3\text{COO})_3$  (0.2 mmol). The flask was evacuated and refilled with  $\text{N}_2$  for three times. The vessel was then charged with extra dry  $\text{CH}_3\text{CN}$  (1.0 mL), alkene **1** (0.2 mmol),  $\text{CCl}_3\text{CN}$  (1.0 mL). The reaction mixture was stirred under nitrogen atmosphere and irradiated by 365 nm LEDs for 24 h. After completion of the reaction, the system was diluted with EtOAc. After concentrated under vacuum, the resulting residue was purified by silica gel flash column chromatography to give the product **2**, and by-product (**bp-1**) (Figure S7).

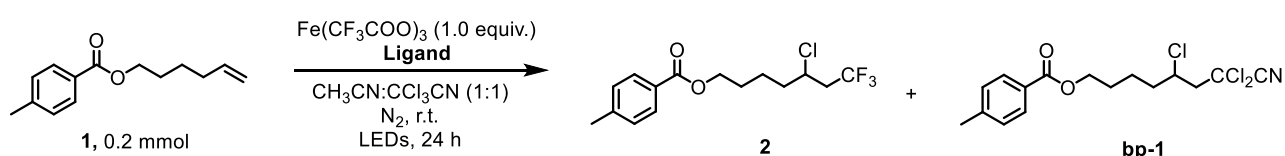

| Entry | LEDs     | Ligand    | Yield of <b>2</b> (%) | Yield of <b>bp-1</b> (%) | Ligand                                                                                |
|-------|----------|-----------|-----------------------|--------------------------|---------------------------------------------------------------------------------------|
| 1     | 365 nm   | -         | 28                    | 25                       | 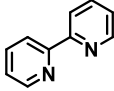  |
| 2     | 390 nm   | -         | 11                    | 15                       |   |
| 3     | 450 nm   | -         | n.d.                  | n.d.                     |                                                                                       |
| 4     | darkness | -         | n.d.                  | n.d.                     |  |
| 5     | 450 nm   | <b>L1</b> | n.d.                  | n.d.                     |  |
| 6     | 450 nm   | <b>L2</b> | 24                    | 17                       |  |
| 7     | 450 nm   | <b>L3</b> | 11                    | 11                       |  |
| 8     | darkness | <b>L2</b> | n.d.                  | n.d.                     |  |

**Figure S7.** Chloro-trifluoromethylation of alkene **1**.

#### Data for **bp-1**:

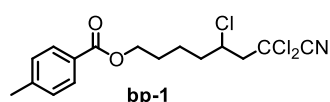

**5,7,7-Trichloro-7-cyanoheptyl 4-methylbenzoate (bp-1):** 18.2 mg colorless liquid was isolated, yield: 25%.  $^1\text{H NMR}$  (400 MHz, Chloroform-*d*)  $\delta$  7.93 (d,  $J = 8.2$  Hz, 2H), 7.24 (d,  $J = 8.0$  Hz, 2H), 4.33 (t,  $J = 6.3$  Hz, 2H), 4.26 – 4.19 (m, 1H), 3.08 – 2.98 (m, 1H), 2.92 – 2.82 (m, 1H), 2.41 (s, 3H), 1.99 – 1.63 (m, 6H).  $^{13}\text{C NMR}$  (101 MHz, Chloroform-*d*)  $\delta$  166.66, 143.67, 129.58, 129.12, 127.49, 115.11, 66.42, 64.18, 56.40, 55.07, 37.97, 28.03, 22.57, 21.68. **ESI-HRMS** exact mass calculated for  $[\text{C}_{16}\text{H}_{18}\text{Cl}_3\text{NO}_2\text{Na}^+]$ : 384.0295, found 384.0299.

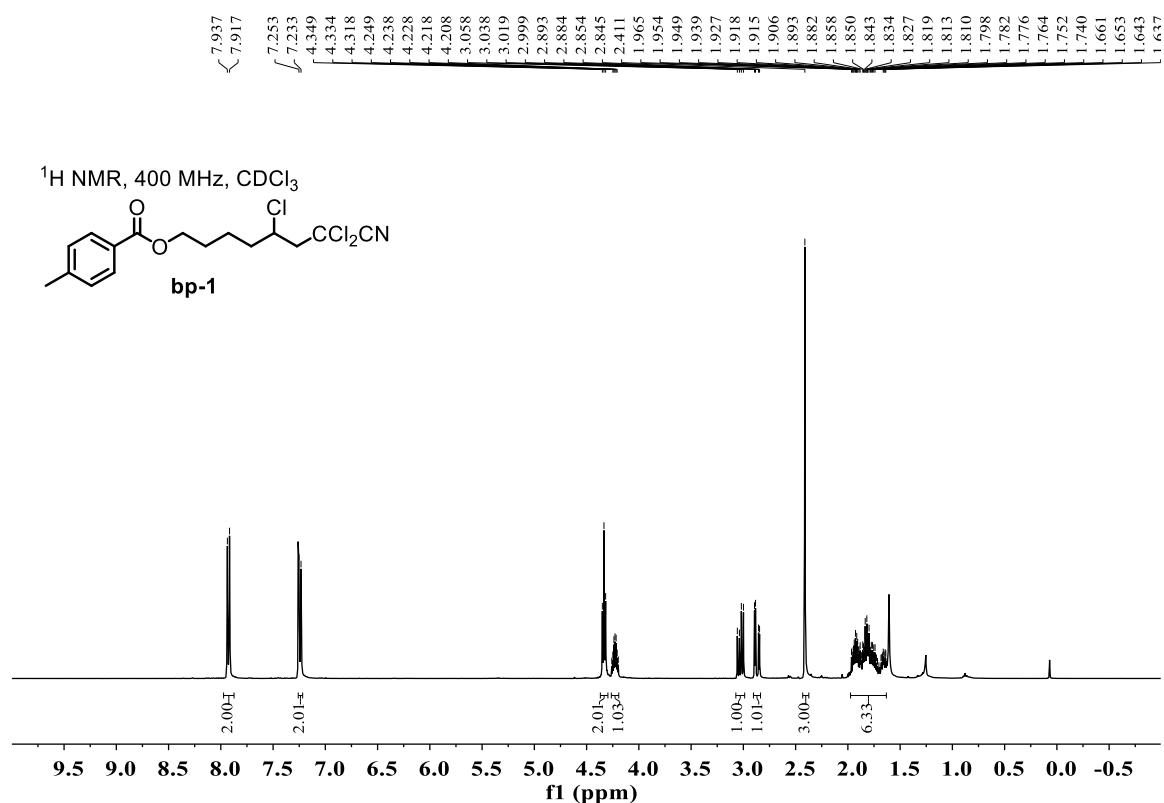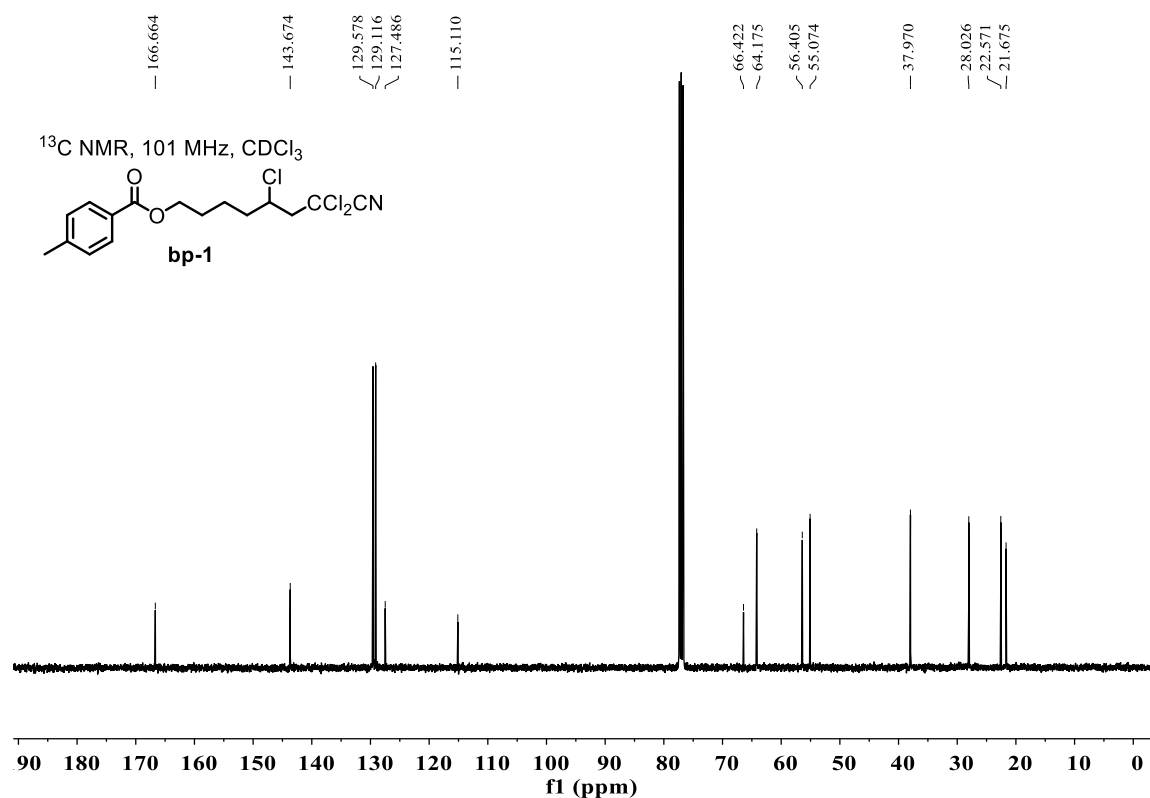

**General procedure for *Standard condition A*:** A 25-mL Schlenk flask equipped with a magnetic bar was charged with Fe(OTf)<sub>3</sub> (0.02 mmol), **L2** (0.03 mmol) and C<sub>n</sub>F<sub>m</sub>COONa (0.6 mmol). The flask was evacuated and refilled with N<sub>2</sub> for three times. The vessel was then charged with extra dry CH<sub>3</sub>CN (1.0 mL), alkene (0.2 mmol) and CCl<sub>2</sub>CN (1.0 mL). The reaction mixture was stirred under nitrogen atmosphere and irradiated by blue LEDs for 24 h. After

completion of the reaction, the system was diluted with EtOAc. After concentrated under vacuum, the resulting residue was purified by silica gel flash column chromatography to give the products (Figure S8).

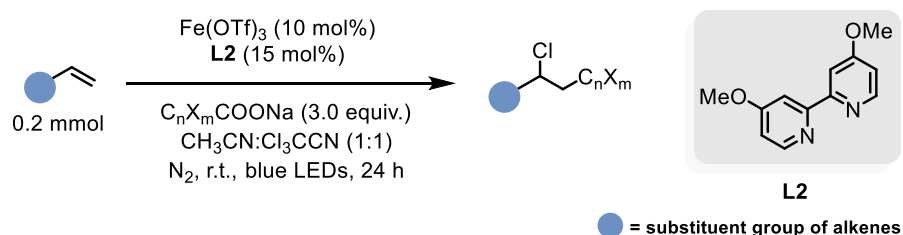

**Figure S8.** Iron LMCT photocatalysis for radical chloro-polyhaloalkylation of non-activated alkenes.

**General procedure for *Standard condition B*:** A 25-mL Schlenk flask equipped with a magnetic bar was charged with  $\text{Fe}(\text{OTf})_3$  (0.02 mmol), **L4** (0.02 mmol),  $\text{C}_n\text{X}_m\text{COONa}$  (0.6 mmol) and Selectfluor (0.3 mmol). The flask was evacuated and refilled with  $\text{N}_2$  for three times. The vessel was then charged with extra dry  $\text{CH}_3\text{CN}$  (2.0 mL), alkene (0.2 mmol) and anisole (0.08 mmol). The reaction mixture was stirred under nitrogen atmosphere and irradiated by blue LEDs for 12 h. After completion of the reaction, the system was diluted with EtOAc. After concentrated under vacuum, the resulting residue was purified by silica gel flash column chromatography to give the products (Figure S9).

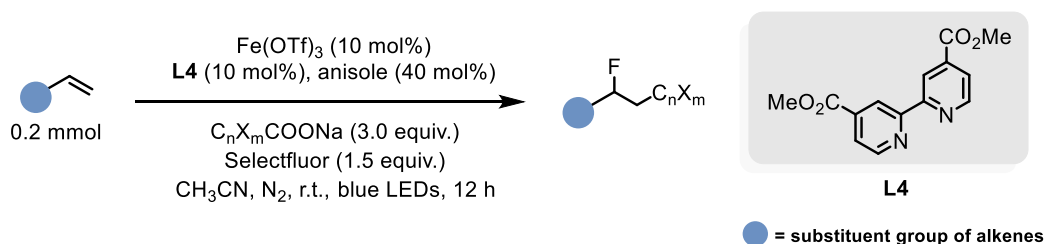

**Figure S9.** Iron LMCT photocatalysis for radical fluoro-polyhaloalkylation of non-activated alkenes.

**General procedure for gram-scale synthesis:** A 200-mL Schlenk flask equipped with a magnetic bar was charged with  $\text{Fe}(\text{OTf})_3$  (1.2 mmol), **L2** (1.8 mmol) and  $\text{CF}_3\text{COONa}$  (36.0 mmol). The flask was evacuated and refilled with  $\text{N}_2$  for three times. The vessel was then charged with extra dry  $\text{CH}_3\text{CN}$  (60.0 mL), alkene **1** (12.0 mmol),  $\text{CCl}_3\text{CN}$  (60.0 mL). The reaction mixture was stirred under nitrogen atmosphere and irradiated by blue LEDs for 7 days. After completion of the reaction, the system was diluted with EtOAc. After concentrated under vacuum, the resulting residue was purified by silica gel flash column chromatography to give the product **2** (Figure S10).

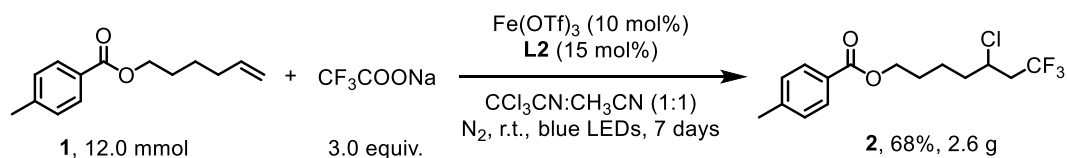

**Figure S10.** The gram-scale synthesis.

**General procedure for TON experiment:** A 50-mL Schlenk flask equipped with a magnetic bar was charged with  $\text{Fe}(\text{OTf})_3$  (0.006 mmol), **L2** (0.009 mmol) and  $\text{CF}_3\text{COONa}$  (6.0 mmol). The flask was evacuated and refilled with  $\text{N}_2$



for three times. The vessel was then charged with extra dry CH<sub>3</sub>CN (10.0 mL), alkene **1** (2.0 mmol) and CCl<sub>3</sub>CN (10.0 mL). The reaction mixture was stirred under nitrogen atmosphere and irradiated by blue LEDs for 7 days. After completion of the reaction, the system was diluted with EtOAc. After concentrated under vacuum, the resulting residue was purified by silica gel flash column chromatography to give the product **2**(Figure S11).

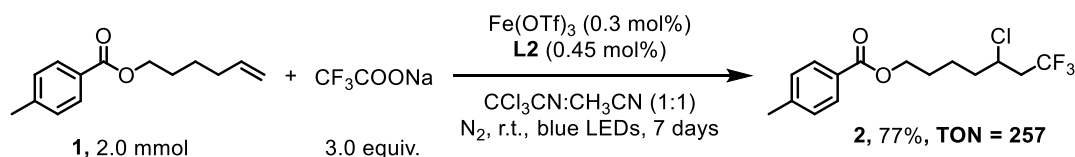

**Figure S11.** The TON experiment.

**General procedure for chloro-trifluoromethylation of conjugated alkene:** A 25-mL Schlenk flask equipped with a magnetic bar was charged with Fe(OTf)<sub>3</sub> (0.02 mmol), L2 (0.03 mmol) and CF<sub>3</sub>COONa (0.6 mmol). The flask was evacuated and refilled with N<sub>2</sub> for three times. The vessel was then charged with extra dry CH<sub>3</sub>CN (1.0 mL), conjugated alkene (0.2 mmol) and CCl<sub>3</sub>CN (1.0 mL). The reaction mixture was stirred under nitrogen atmosphere and irradiated by blue LEDs for 24 h. After completion of the reaction, the system was diluted with EtOAc. After concentrated under vacuum, the resulting residue was purified by silica gel flash column chromatography to give the products. During the investigations of substrate scope, we found that conjugated alkene are not suitable for this reaction. Only product **44** was observed in a yield of 17% (Figure S12).

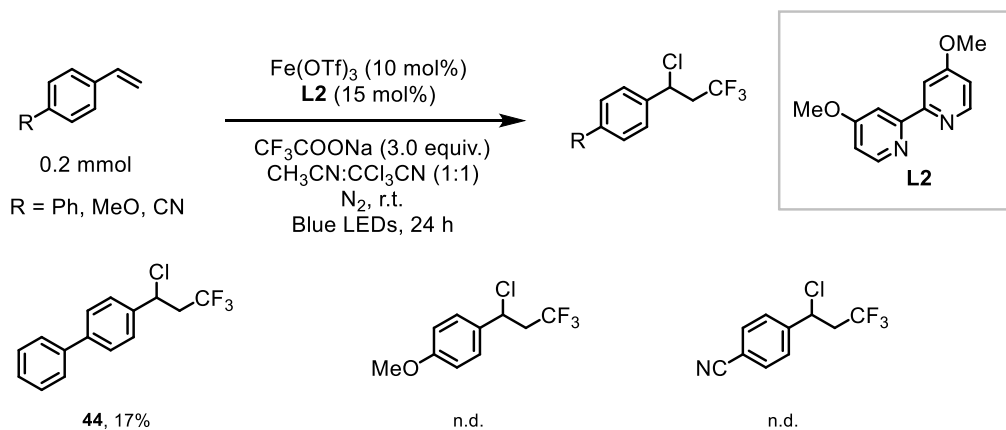

**Figure S12.** Investigations on the conjugated alkene.

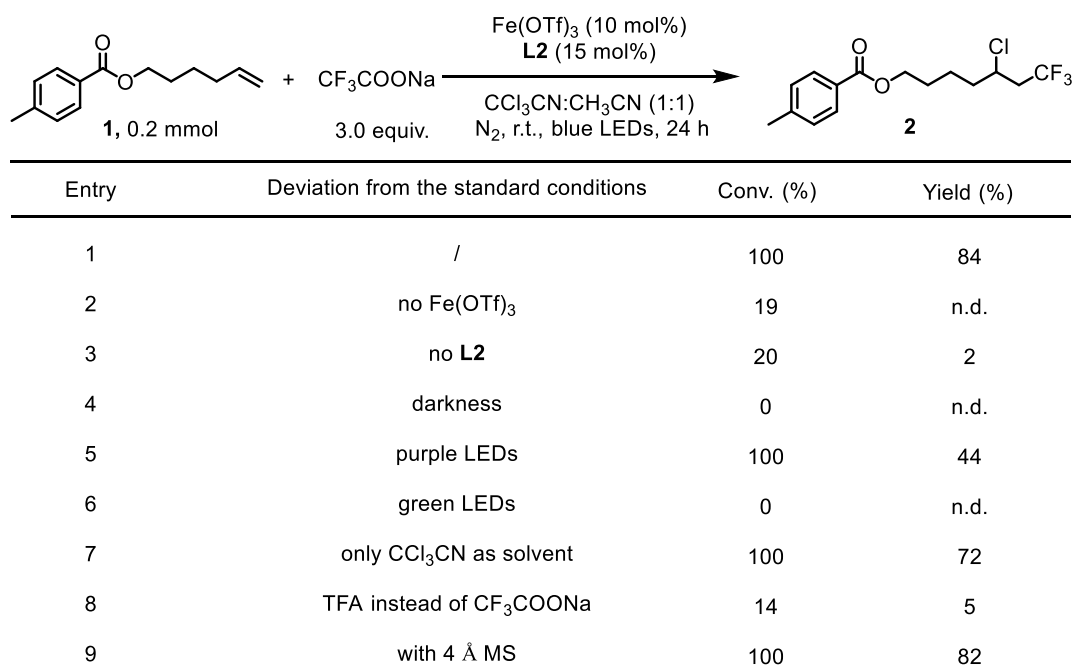

**Figure S13.** The results of deviation from *Standard condition A*. Yields and conversion rates were determined by GC analysis of the crude reaction mixture, using biphenyl as an internal standard.

#### Investigations of ligand:

We investigated the substituent effects of bipyridines (Figure S14). For para-substituted bipyridines, it was very interesting that only strong electron-donating/withdrawing functional groups (**L2**, **L3**, **L8**) could efficiently dominate the desired transformation (Figure S15-a). However, when installing CN group in the ortho/meta-position of bpy, the yields of **2** dropped dramatically, while moderate electron-deficient substituent group COOMe or COOEt showcased good tuning ability as well (Figure S15-b). We have tried our best to understand the interesting substituent effects of bipyridines. However, due to the fact that the substituted bipyridine as the ligand not only influences the performance of in situ generated light-harvesting species but also enables the reducibility of [Fe<sup>II</sup>/L] species (**III**), the substituent effect of bipyridine is complicated.

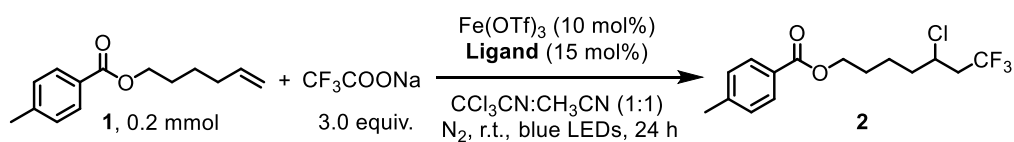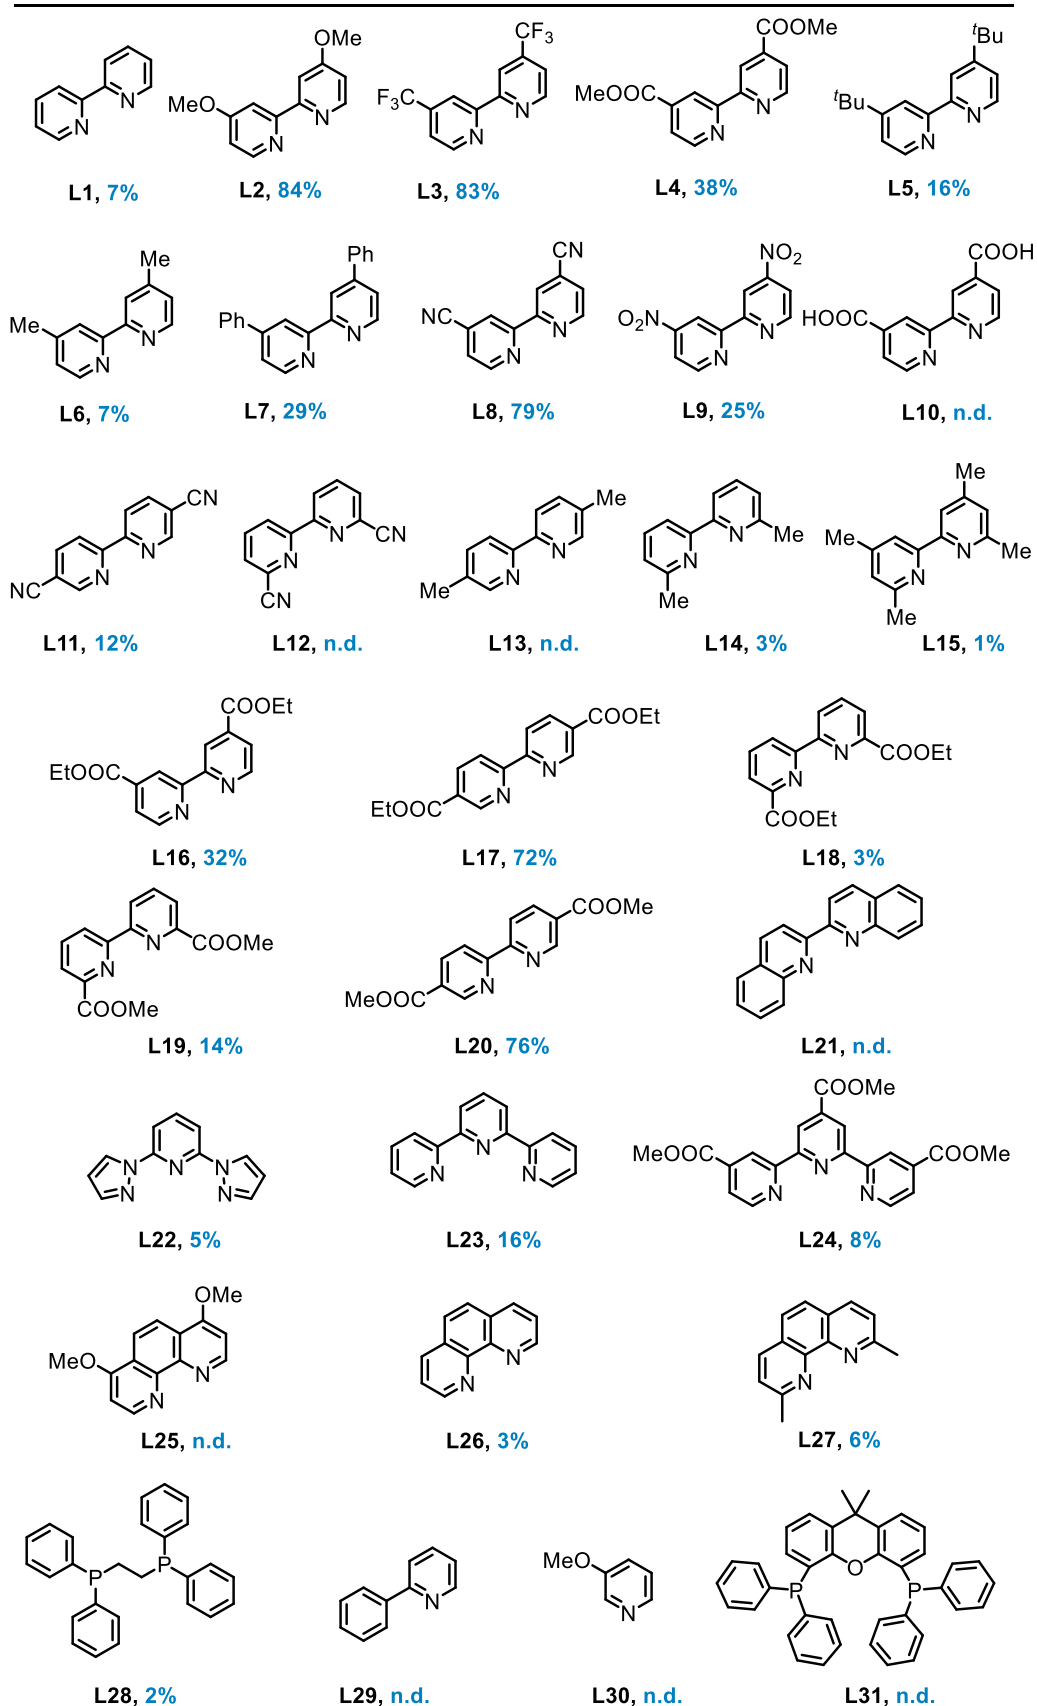

**Figure S14.** Investigations on the ligand. Yields were determined by GC analysis of the crude reaction mixture, using biphenyl as an internal standard.

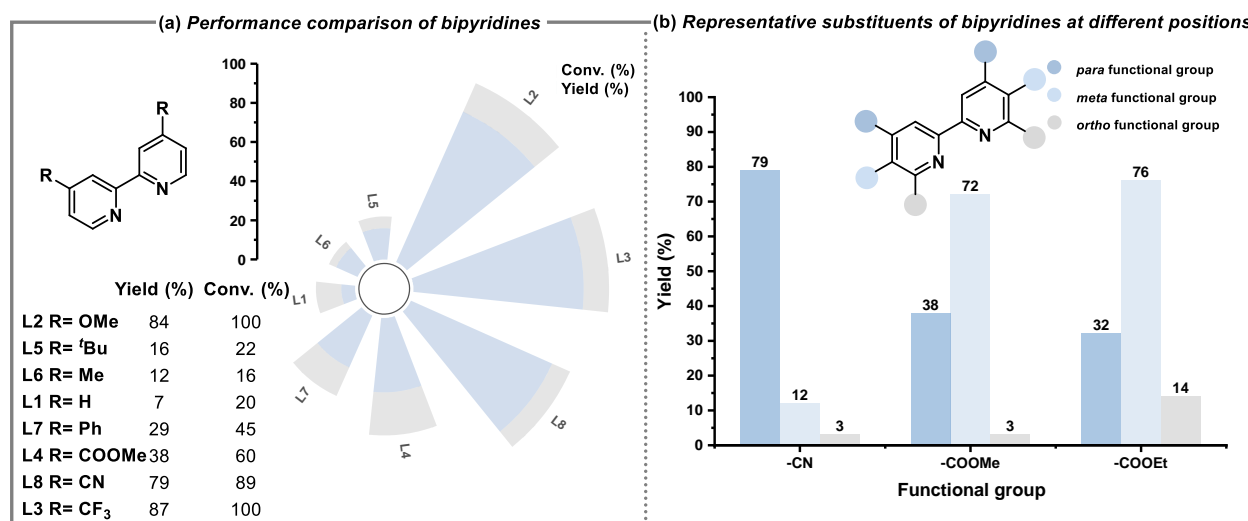

**Figure S15.** Intriguing ligand effects.

#### Investigations of solvent:

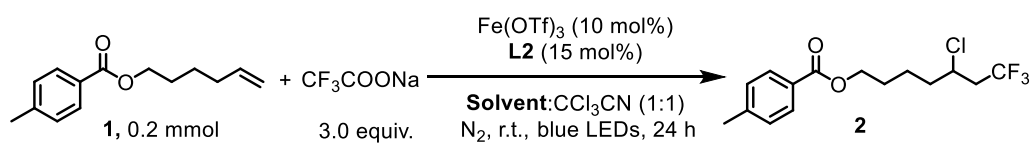

| Entry | Solvent             | Yield (%) |
|-------|---------------------|-----------|
| 1     | CH <sub>3</sub> CN  | 84        |
| 2     | CCl <sub>3</sub> CN | 72        |
| 3     | benzonitrile        | 60        |
| 4     | DCE                 | 80        |
| 5     | DCM                 | 83        |
| 6     | DMF                 | 4         |
| 7     | DMSO                | 6         |
| 8     | acetone             | 80        |
| 9     | 1,4-dioxane         | 29        |
| 10    | THF                 | 39        |
| 11    | EtOAc               | 58        |
| 12    | cyclohexane         | 7         |
| 13    | toluene             | 7         |

**Figure S16.** Investigations on the solvent. Yields were determined by GC analysis of the crude reaction mixture, using biphenyl as an internal standard.

### Investigations of chlorine source :

The investigations of chlorine source for the determination of *Standard condition A* were carried out (Figure S17). The results showed that trichloroacetonitrile was competent, while other potential chlorine sources such as trichloromethane, ethyl chloroacetate analogue, NCS (N-chlorosuccinimide), etc. could not yield the desired chloro-trifluoromethylation product. Therefore, the trichloroacetonitrile was chosen as the chlorine source.

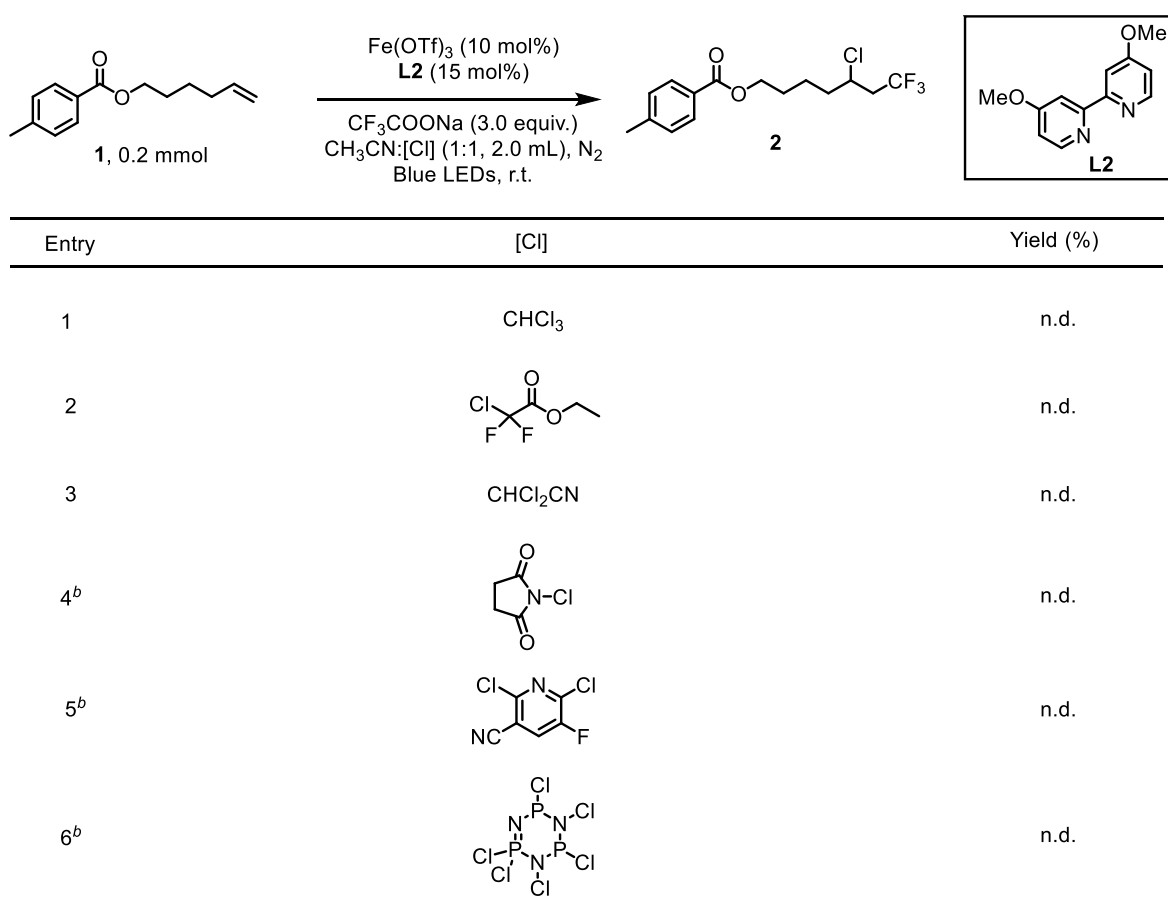

**Figure S17.** Investigations on chlorine source. <sup>b</sup>3.0 equiv. [Cl], 2.0 mL CH<sub>3</sub>CN.

### Investigations of bromine source :

The investigations of bromine sources for the determination of *Standard condition A* were carried out (Figure S18). It was disappointing that no desired bromo-trifluoromethylation products were detected, while we observed these undesired by-products (**b-1**, **b-2** and **b-3**). It indicated that the bromination reagents were activated preferentially, causing that no CF<sub>3</sub> radical from CF<sub>3</sub>COO<sup>-</sup> was generated.

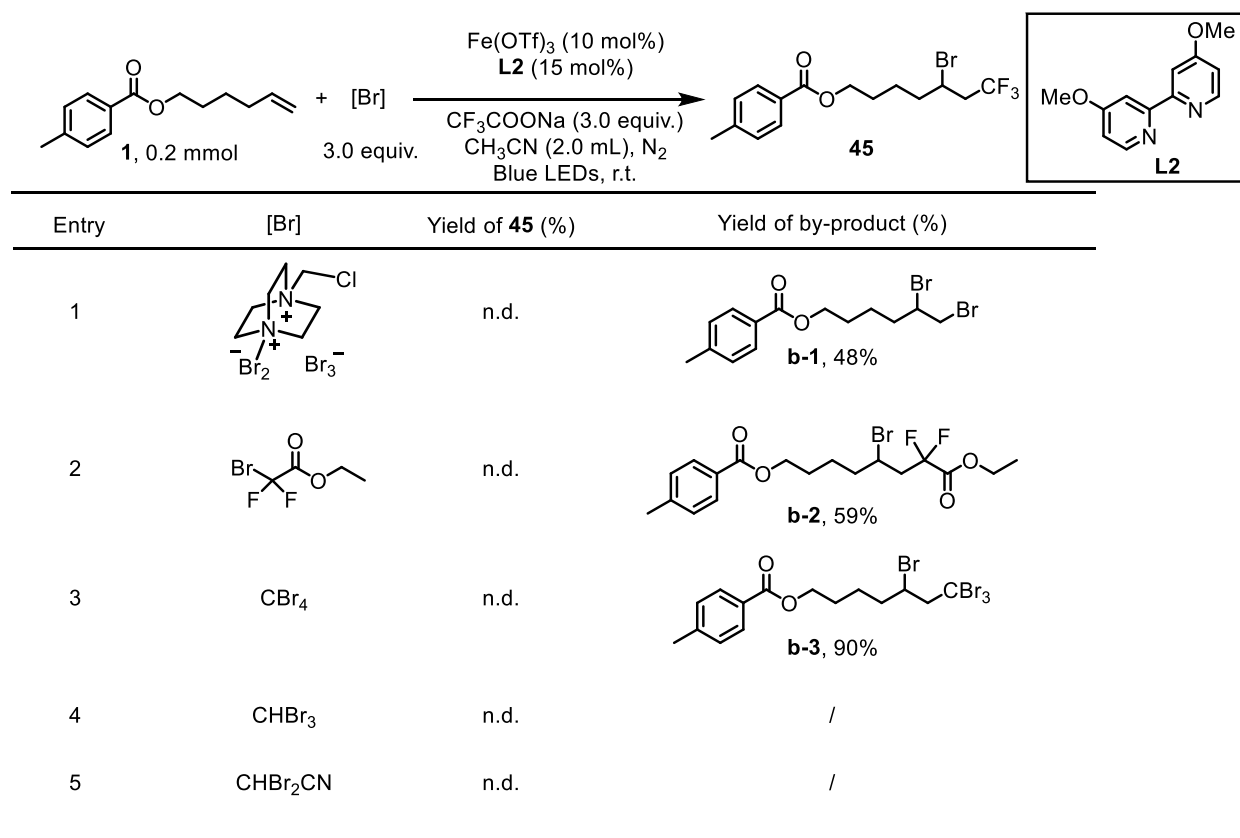

**Figure S18.** Investigations on bromine source.

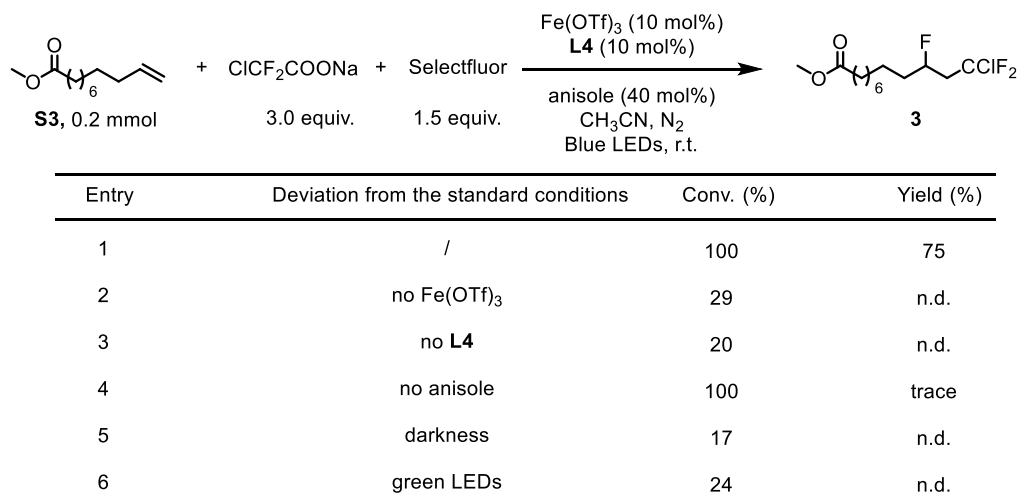

**Figure S19.** The results of deviation from *Standard condition B*. Yields and conversion rates were determined by GC analysis of the crude reaction mixture, using biphenyl as an internal standard.

As shown in Figure S19, under the standard condition, product **3** could be obtained in 75% yield and 100% conversion rate with anisole (Entry 1). However, there was trace amount of product detected in absence of anisole, but the conversion rate still remained 100% (Entry 4). Based on previous reports,<sup>4</sup> anisole was considered to act as a redox buffer to reduce the reactivity of N radical cation generated from Selectfluor to avoid alkene converting into aminated products (Figure S20).

### Anisole as Redox Buffer

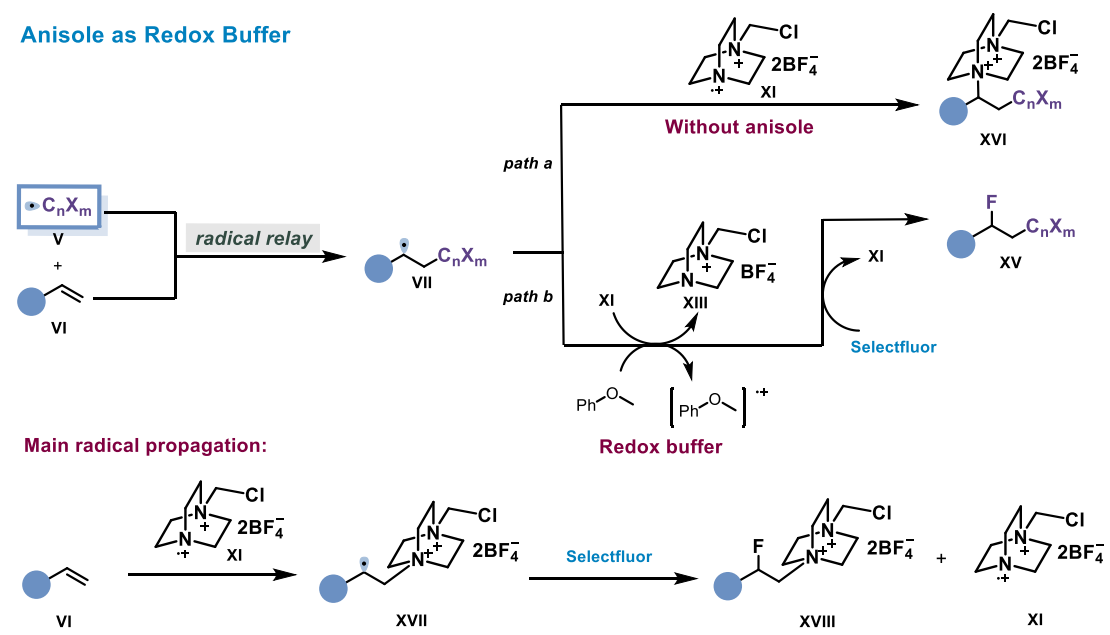

### Proposed Mechanism for Fluoro-Polyhaloalkylation of Alkenes

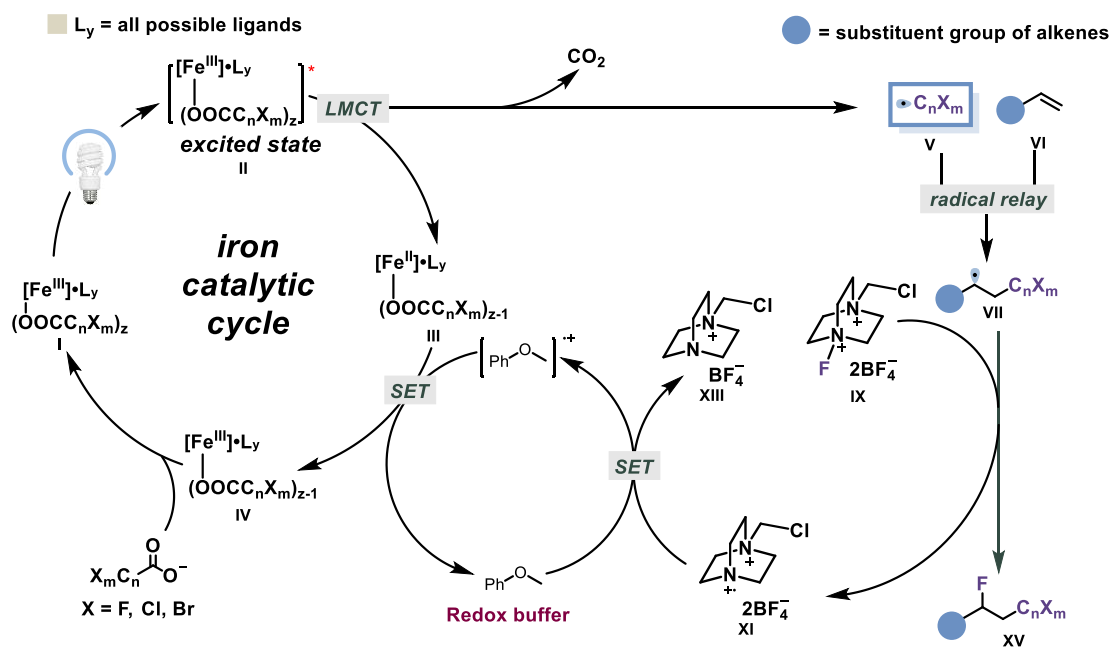

Figure S20. Proposed mechanism for fluoro-polyhaloalkylation of alkenes with anisole as a redox buffer.

#### 4. Mechanistic studies

**Details of DFT calculations:** All the calculations have been performed using the Gaussian Program (Gaussian 16).<sup>5</sup> The geometry optimization was conducted with the B3LYP functional and standard 6-31G(d) basis set. The solvent effect was considered by IEFPCM.<sup>6,7</sup> Harmonic vibrational frequency calculations were performed for all stationary points to confirm whether they are local minima or transition state structures and to derive the thermochemical corrections for the enthalpies and free energies. Furthermore, the entropy in the solution model have been recalculated by the THERMO program<sup>8</sup> which affords a new solution translational entropy.

#### Free energies of possible light-harvesting species

| Species / $\Delta G$ (kcal/mol)  | Gibbs free energy | Gibbs free energy with the Fang's entropy correction |
|----------------------------------|-------------------|------------------------------------------------------|
| <b>IntA</b> / 0.0                | -2842.263499      | -2842.24605                                          |
| <b>L2</b>                        | -724.277027       | -724.26669                                           |
| CF <sub>3</sub> COO <sup>-</sup> | -526.333494       | -526.32218                                           |
| CH <sub>3</sub> CN               | -132.745397       | -132.73426                                           |
| CCl <sub>3</sub> CN              | -1511.510476      | -1511.49972                                          |
| <b>IntE</b> / -42.2              | -3566.589872      | -3566.57998                                          |
| <b>IntF</b> / -9.9               | -3040.216289      | -3040.20626                                          |
| <b>IntG</b> / -16.5              | -3172.960958      | -3172.95109                                          |
| <b>IntG1</b> / -14.7             | -3172.958151      | -3172.94829                                          |
| <b>IntB</b> / -20.8              | -3305.701959      | -3305.69224                                          |
| <b>IntB1</b> / -20.9             | -3305.702152      | -3305.69244                                          |
| <b>IntB2</b> / -15.9             | -3305.694061      | -3305.68434                                          |
| <b>IntD</b> / -7.8               | -4551.712437      | -4551.70268                                          |
| <b>IntD1</b> / -6.0              | -6063.20919       | -6063.19964                                          |
| <b>IntC</b> / -14.8              | -3695.4926        | -3695.48297                                          |
| <b>1</b>                         | -655.279172       | -655.26883                                           |



**Table S1.** Free energies of possible light-harvesting species.

**Cartesian coordination of the optimized structures**

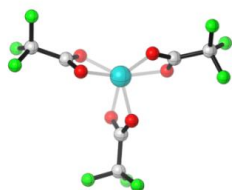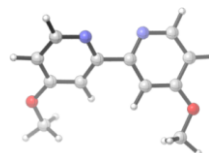

**IntA**

|    |          |          |          |
|----|----------|----------|----------|
| Fe | -0.53682 | -0.28552 | 0.91333  |
| O  | -2.27761 | -0.20829 | -0.30283 |
| C  | -2.59755 | 0.83104  | 0.33050  |
| O  | -1.82692 | 1.27988  | 1.23478  |
| O  | 0.60677  | 0.59827  | -0.54727 |
| C  | 0.77005  | -0.53812 | -1.09186 |
| O  | 0.30095  | -1.57113 | -0.54475 |
| O  | -0.16204 | -0.38388 | 2.94826  |
| C  | -0.88894 | -1.42008 | 3.00944  |
| O  | -1.42439 | -1.87342 | 1.95968  |
| C  | 1.46689  | -0.63406 | -2.45912 |
| C  | -1.06988 | -2.14651 | 4.35263  |
| C  | -3.93965 | 1.53461  | 0.06949  |
| F  | -3.78018 | 2.86353  | 0.09456  |
| F  | -4.44398 | 1.17618  | -1.11415 |
| F  | -4.80713 | 1.18633  | 1.03496  |
| F  | 2.38338  | 0.33031  | -2.59413 |
| F  | 2.05785  | -1.82422 | -2.60617 |
| F  | 0.54181  | -0.48902 | -3.42413 |
| F  | -0.11418 | -3.08424 | 4.47047  |
| F  | -0.95813 | -1.28835 | 5.37175  |
| F  | -2.26597 | -2.74121 | 4.40896  |

**L2**

|   |          |          |          |
|---|----------|----------|----------|
| C | -1.26392 | -2.66566 | -0.55264 |
| C | -2.35527 | -3.47760 | -0.27746 |
| C | -3.54496 | -2.86626 | 0.14354  |
| C | -3.57067 | -1.47211 | 0.25956  |
| C | -2.41058 | -0.74688 | -0.05388 |
| N | -1.26531 | -1.32738 | -0.45043 |
| H | -0.32984 | -3.11866 | -0.87973 |
| H | -2.30140 | -4.55587 | -0.37593 |
| H | -4.45431 | -0.95489 | 0.60831  |
| C | -2.41077 | 0.74713  | 0.05170  |
| C | -3.57079 | 1.47212  | -0.26250 |
| N | -1.26587 | 1.32786  | 0.44900  |
| C | -3.54544 | 2.86628  | -0.14646 |
| H | -4.45410 | 0.95473  | -0.61182 |
| C | -1.26482 | 2.66614  | 0.55121  |
| C | -2.35615 | 3.47786  | 0.27532  |
| H | -0.33104 | 3.11933  | 0.87890  |
| H | -2.30256 | 4.55614  | 0.37382  |
| O | -4.58543 | 3.68643  | -0.41917 |
| O | -4.58496 | -3.68662 | 0.41557  |
| C | -5.82189 | -3.10615 | 0.84095  |

|   |          |          |          |
|---|----------|----------|----------|
| H | -6.22562 | -2.43165 | 0.07860  |
| H | -6.50581 | -3.94178 | 0.98639  |
| H | -5.70176 | -2.56440 | 1.78489  |
| C | -5.82196 | 3.10571  | -0.84538 |
| H | -6.22606 | 2.43113  | -0.08329 |
| H | -6.50595 | 3.94121  | -0.99127 |
| H | -5.70109 | 2.56399  | -1.78924 |

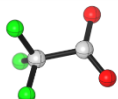

CF<sub>3</sub>COO<sup>-</sup>

|   |          |          |         |
|---|----------|----------|---------|
| O | -1.77903 | -0.70500 | 1.32873 |
| C | -1.10276 | -0.64742 | 2.37922 |
| O | 0.11612  | -0.45547 | 2.56837 |
| C | -1.95920 | -0.88489 | 3.66978 |
| F | -1.28450 | -0.68401 | 4.82663 |
| F | -3.04838 | -0.07207 | 3.71422 |
| F | -2.43252 | -2.16142 | 3.71687 |

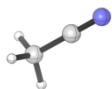

CH<sub>3</sub>CN

|   |          |          |          |
|---|----------|----------|----------|
| C | -0.23446 | -0.61292 | -3.65840 |
| N | -0.38236 | -0.62883 | -2.50688 |
| C | -0.04884 | -0.59288 | -5.10516 |
| H | -0.84193 | -1.16563 | -5.59240 |
| H | -0.07850 | 0.43608  | -5.47229 |
| H | 0.91686  | -1.03368 | -5.36493 |

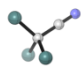

CCl<sub>3</sub>CN

|    |          |          |          |
|----|----------|----------|----------|
| C  | -0.24899 | -0.61426 | -3.55447 |
| N  | -0.40111 | -0.63123 | -2.40471 |
| C  | -0.05889 | -0.59373 | -5.00417 |
| Cl | -1.37998 | -1.54372 | -5.77409 |
| Cl | -0.11516 | 1.11054  | -5.57186 |
| Cl | 1.53490  | -1.32546 | -5.39077 |

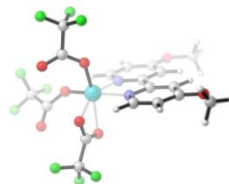

**IntE**

|   |          |          |          |
|---|----------|----------|----------|
| C | 1.67411  | -2.37402 | 0.02045  |
| C | 3.00964  | -2.74748 | 0.02442  |
| C | 3.97890  | -1.73688 | -0.06453 |
| C | 3.55329  | -0.39840 | -0.14966 |
| C | 2.19839  | -0.11411 | -0.14593 |
| N | 1.26685  | -1.09863 | -0.06588 |
| H | 0.89101  | -3.12141 | 0.07829  |
| H | 3.26833  | -3.79495 | 0.09494  |
| H | 4.30530  | 0.37685  | -0.21238 |
| C | 1.64202  | 1.25971  | -0.22428 |
| C | 2.43365  | 2.39641  | -0.34830 |
| N | 0.29074  | 1.33194  | -0.16903 |
| C | 1.81242  | 3.65360  | -0.41960 |
| H | 3.50900  | 2.30838  | -0.39102 |
| C | -0.30496 | 2.54210  | -0.24658 |
| C | 0.40846  | 3.71530  | -0.36985 |
| H | -1.38747 | 2.54000  | -0.21257 |
| H | -0.09592 | 4.67172  | -0.42874 |

|    |          |          |          |
|----|----------|----------|----------|
| Fe | -0.77867 | -0.47491 | 0.03337  |
| O  | -0.83348 | -0.80685 | 1.91757  |
| C  | -1.81675 | -1.19718 | 2.67627  |
| O  | -2.86777 | -1.71647 | 2.35150  |
| O  | -2.46926 | 0.44504  | -0.07792 |
| C  | -3.57437 | 0.27452  | -0.73504 |
| O  | -3.88489 | -0.62822 | -1.49241 |
| O  | -0.86299 | -0.76278 | -2.19951 |
| C  | -1.29398 | -1.90071 | -1.91771 |
| O  | -1.34918 | -2.31894 | -0.71619 |
| C  | -1.50833 | -0.92498 | 4.17076  |
| C  | -4.57481 | 1.42263  | -0.44408 |
| C  | -1.72687 | -2.86478 | -3.03454 |
| F  | -2.02436 | -2.20240 | -4.15991 |
| F  | -0.71657 | -3.71908 | -3.30070 |
| F  | -2.79657 | -3.58412 | -2.66566 |
| F  | -5.68128 | 1.31990  | -1.19216 |
| F  | -4.00943 | 2.62463  | -0.70099 |
| F  | -4.94303 | 1.41497  | 0.85350  |
| F  | -1.33860 | 0.39748  | 4.38362  |
| F  | -2.50160 | -1.34864 | 4.96456  |
| F  | -0.37457 | -1.55036 | 4.54896  |
| O  | 2.45748  | 4.81781  | -0.53669 |
| C  | 3.89450  | 4.82724  | -0.58974 |
| H  | 4.31978  | 4.41446  | 0.32943  |
| H  | 4.25537  | 4.26916  | -1.45827 |
| H  | 4.17300  | 5.87521  | -0.68507 |
| O  | 5.30140  | -1.93342 | -0.07447 |
| C  | 5.80702  | -3.27707 | 0.00890  |
| H  | 5.49979  | -3.74991 | 0.94588  |

|   |         |          |          |
|---|---------|----------|----------|
| H | 5.46781 | -3.87278 | -0.84325 |
| H | 6.89095 | -3.18066 | -0.01703 |

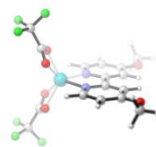

### IntF

|    |          |          |          |
|----|----------|----------|----------|
| C  | 0.27918  | -2.42935 | -0.95270 |
| C  | 1.48086  | -3.07332 | -1.18788 |
| C  | 2.67061  | -2.34573 | -1.01121 |
| C  | 2.58943  | -0.99729 | -0.60813 |
| C  | 1.34984  | -0.42708 | -0.39549 |
| N  | 0.20447  | -1.14306 | -0.56721 |
| H  | -0.66186 | -2.95380 | -1.07095 |
| H  | 1.47518  | -4.10973 | -1.49541 |
| H  | 3.50739  | -0.44088 | -0.47205 |
| C  | 1.13446  | 0.97491  | 0.03073  |
| C  | 2.14743  | 1.88935  | 0.24043  |
| N  | -0.17307 | 1.31617  | 0.20276  |
| C  | 1.82299  | 3.20188  | 0.63915  |
| H  | 3.18946  | 1.63114  | 0.10515  |
| C  | -0.48509 | 2.56742  | 0.58470  |
| C  | 0.47032  | 3.54168  | 0.81508  |
| H  | -1.53964 | 2.78768  | 0.70389  |
| H  | 0.15596  | 4.53024  | 1.11964  |
| Fe | -1.57432 | -0.16072 | -0.18901 |
| O  | -2.59675 | 0.16839  | 1.61439  |
| C  | -2.72839 | -1.08383 | 1.73875  |
| O  | -2.27569 | -1.85935 | 0.84980  |
| O  | -2.79429 | 1.23329  | -1.21189 |

|   |          |          |          |
|---|----------|----------|----------|
| C | -2.93606 | 0.37838  | -2.13020 |
| O | -2.39248 | -0.76041 | -2.02262 |
| C | -3.38666 | -1.65895 | 3.00401  |
| F | -3.92277 | -2.85862 | 2.75745  |
| F | -2.44917 | -1.79252 | 3.95871  |
| F | -4.34198 | -0.83700 | 3.45302  |
| C | -3.71571 | 0.73509  | -3.40658 |
| F | -2.85435 | 1.21361  | -4.32170 |
| F | -4.31822 | -0.34798 | -3.90997 |
| F | -4.63722 | 1.67028  | -3.15397 |
| O | 2.85280  | 4.02710  | 0.81689  |
| O | 3.89906  | -2.82631 | -1.19310 |
| C | 4.06635  | -4.19839 | -1.59909 |
| H | 3.59667  | -4.37262 | -2.57069 |
| H | 5.14169  | -4.34622 | -1.67590 |
| H | 3.65065  | -4.87533 | -0.84818 |
| C | 2.60572  | 5.39005  | 1.21255  |
| H | 3.58921  | 5.84958  | 1.28853  |
| H | 2.01065  | 5.90835  | 0.45599  |
| H | 2.10298  | 5.42494  | 2.18261  |

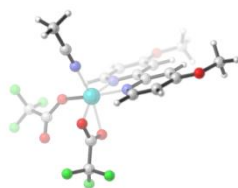

### IntG

|   |         |          |         |
|---|---------|----------|---------|
| C | 1.82458 | -2.33271 | 0.32981 |
| C | 3.15853 | -2.64926 | 0.47230 |
| C | 4.11211 | -1.61857 | 0.38727 |
| C | 3.66620 | -0.30481 | 0.16238 |

|    |          |          |          |
|----|----------|----------|----------|
| C  | 2.30224  | -0.07191 | 0.02984  |
| N  | 1.39355  | -1.07250 | 0.10981  |
| H  | 1.05867  | -3.09738 | 0.38288  |
| H  | 3.47537  | -3.66994 | 0.64619  |
| H  | 4.36979  | 0.51164  | 0.09601  |
| C  | 1.72041  | 1.27380  | -0.20507 |
| C  | 2.48269  | 2.42569  | -0.34687 |
| N  | 0.36532  | 1.30254  | -0.27525 |
| C  | 1.83085  | 3.65131  | -0.57216 |
| H  | 3.55985  | 2.37809  | -0.28864 |
| C  | -0.26036 | 2.48200  | -0.49533 |
| C  | 0.42566  | 3.66624  | -0.64621 |
| H  | -1.34123 | 2.44419  | -0.55042 |
| H  | -0.09941 | 4.59680  | -0.82130 |
| Fe | -0.64218 | -0.50174 | -0.08651 |
| O  | -2.37155 | 0.28450  | -0.23081 |
| C  | -3.43078 | 0.06592  | -0.95919 |
| O  | -3.65557 | -0.87307 | -1.69860 |
| O  | -0.62362 | -0.99865 | -2.14846 |
| C  | -1.03956 | -2.14602 | -1.83267 |
| O  | -1.14571 | -2.48084 | -0.61678 |
| C  | -4.47232 | 1.19843  | -0.78104 |
| C  | -1.37165 | -3.16896 | -2.93041 |
| F  | -1.73426 | -2.55578 | -4.06285 |
| F  | -0.27896 | -3.91660 | -3.17959 |
| F  | -2.36153 | -3.98142 | -2.54057 |
| F  | -3.92107 | 2.39637  | -1.07974 |
| F  | -5.53460 | 1.02021  | -1.57422 |
| F  | -4.89978 | 1.25018  | 0.49563  |
| C  | -1.09936 | -1.09365 | 3.07805  |

|   |          |          |          |
|---|----------|----------|----------|
| N | -0.92146 | -0.88697 | 1.95397  |
| C | -1.32176 | -1.35659 | 4.48582  |
| H | -0.39080 | -1.20196 | 5.03705  |
| H | -2.08940 | -0.67785 | 4.86582  |
| H | -1.65389 | -2.39021 | 4.61243  |
| O | 2.44699  | 4.82246  | -0.72695 |
| O | 5.38947  | -1.97568 | 0.53184  |
| C | 6.42017  | -0.97433 | 0.45735  |
| H | 6.29244  | -0.22711 | 1.24537  |
| H | 7.35463  | -1.51156 | 0.60820  |
| H | 6.42464  | -0.49442 | -0.52525 |
| C | 3.88444  | 4.88313  | -0.67397 |
| H | 4.32622  | 4.27224  | -1.46578 |
| H | 4.13397  | 5.93035  | -0.83341 |
| H | 4.24912  | 4.56046  | 0.30496  |

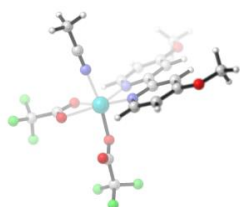

### IntG1

|   |         |          |          |
|---|---------|----------|----------|
| C | 1.94882 | -2.53285 | -0.13941 |
| C | 3.26295 | -2.90017 | 0.05567  |
| C | 4.24043 | -1.89407 | 0.16337  |
| C | 3.83901 | -0.55118 | 0.06749  |
| C | 2.49279 | -0.26359 | -0.12676 |
| N | 1.56205 | -1.24182 | -0.22613 |
| H | 1.17038 | -3.27675 | -0.25557 |
| H | 3.54694 | -3.94314 | 0.11881  |
| H | 4.56123 | 0.24844  | 0.13722  |

|    |          |          |          |
|----|----------|----------|----------|
| C  | 1.96383  | 1.11537  | -0.25372 |
| C  | 2.75000  | 2.24834  | -0.16045 |
| N  | 0.62061  | 1.20084  | -0.47464 |
| C  | 2.15931  | 3.51929  | -0.29798 |
| H  | 3.81517  | 2.19427  | 0.02054  |
| C  | 0.05897  | 2.41541  | -0.61317 |
| C  | 0.77802  | 3.59623  | -0.53549 |
| H  | -1.00907 | 2.42938  | -0.78746 |
| H  | 0.26126  | 4.53828  | -0.65533 |
| Fe | -0.42496 | -0.61303 | -0.51381 |
| O  | -2.20354 | 0.54391  | -0.60610 |
| C  | -2.89024 | -0.51570 | -0.51577 |
| O  | -2.34064 | -1.63764 | -0.38471 |
| O  | -0.42248 | -1.04273 | -2.37203 |
| C  | -0.37567 | -2.23651 | -2.89529 |
| O  | -0.25029 | -3.29991 | -2.31485 |
| C  | -4.42149 | -0.41306 | -0.62068 |
| C  | -0.49316 | -2.18338 | -4.43765 |
| F  | -1.65070 | -1.59771 | -4.80321 |
| F  | 0.51922  | -1.46401 | -4.96209 |
| F  | -0.45644 | -3.41027 | -4.97238 |
| F  | -4.76809 | -0.27325 | -1.91367 |
| F  | -5.01416 | -1.51059 | -0.13672 |
| F  | -4.87049 | 0.65421  | 0.05630  |
| C  | -0.67817 | -0.75691 | 2.76903  |
| N  | -0.60427 | -0.68084 | 1.61723  |
| C  | -0.77322 | -0.85283 | 4.21346  |
| H  | 0.23044  | -0.86591 | 4.64551  |
| H  | -1.32542 | 0.00718  | 4.60049  |
| H  | -1.29816 | -1.77287 | 4.48256  |

|   |         |          |          |
|---|---------|----------|----------|
| O | 2.98259 | 4.56201  | -0.18659 |
| C | 2.44781 | 5.89410  | -0.30107 |
| H | 2.00396 | 6.04878  | -1.28815 |
| H | 1.70786 | 6.08106  | 0.48187  |
| H | 3.29979 | 6.55857  | -0.17072 |
| O | 5.49776 | -2.30201 | 0.34642  |
| C | 6.55104 | -1.32720 | 0.45046  |
| H | 6.62175 | -0.73379 | -0.46536 |
| H | 6.39237 | -0.67559 | 1.31414  |
| H | 7.46433 | -1.90325 | 0.58704  |

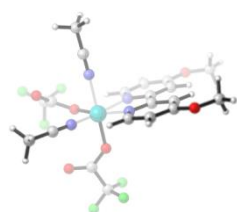

**IntB**

|   |         |          |          |
|---|---------|----------|----------|
| C | 1.79897 | -2.28718 | 1.26455  |
| C | 3.09188 | -2.75002 | 1.39314  |
| C | 4.14909 | -1.92854 | 0.96514  |
| C | 3.84370 | -0.66935 | 0.42441  |
| C | 2.51068 | -0.28040 | 0.32994  |
| N | 1.50027 | -1.07896 | 0.74623  |
| H | 0.96045 | -2.89339 | 1.58485  |
| H | 3.29675 | -3.72634 | 1.81429  |
| H | 4.63003 | -0.01102 | 0.08677  |
| C | 2.08758 | 1.03147  | -0.22414 |
| C | 2.98217 | 1.98433  | -0.70017 |
| N | 0.75107 | 1.24612  | -0.22919 |
| C | 2.48316 | 3.20101  | -1.19396 |
| H | 4.04407 | 1.78969  | -0.68946 |

|    |          |          |          |
|----|----------|----------|----------|
| C  | 0.27215  | 2.41802  | -0.69890 |
| C  | 1.09298  | 3.41294  | -1.18534 |
| H  | -0.80370 | 2.53872  | -0.66495 |
| H  | 0.68252  | 4.34392  | -1.55597 |
| Fe | -0.48612 | -0.31780 | 0.44864  |
| O  | -2.07003 | 0.73608  | 0.25320  |
| C  | -3.15890 | 0.96177  | 0.92690  |
| O  | -3.53402 | 0.44671  | 1.96256  |
| O  | -0.60891 | -1.20441 | -1.24943 |
| C  | -1.62357 | -1.70613 | -1.89259 |
| O  | -2.75588 | -1.90490 | -1.49481 |
| C  | -4.03353 | 2.02948  | 0.22058  |
| C  | -1.22912 | -2.07271 | -3.34652 |
| F  | -0.80684 | -0.97790 | -4.01340 |
| F  | -0.22386 | -2.97258 | -3.35577 |
| F  | -2.26229 | -2.59664 | -4.02016 |
| F  | -4.48697 | 1.56172  | -0.96017 |
| F  | -5.09027 | 2.37543  | 0.96710  |
| F  | -3.31615 | 3.14807  | -0.03049 |
| C  | -0.22247 | 0.95198  | 3.55604  |
| N  | -0.27557 | 0.50059  | 2.49237  |
| C  | -0.15787 | 1.51827  | 4.89230  |
| H  | 0.72757  | 1.14062  | 5.40934  |
| H  | -0.10149 | 2.60758  | 4.82597  |
| H  | -1.05294 | 1.23582  | 5.45217  |
| O  | 3.23460  | 4.19384  | -1.67657 |
| O  | 5.38349  | -2.41915 | 1.10990  |
| C  | 6.51054  | -1.63122 | 0.68957  |
| H  | 6.56592  | -0.69825 | 1.25766  |
| H  | 7.38574  | -2.24272 | 0.90148  |

|   |          |          |          |
|---|----------|----------|----------|
| H | 6.45860  | -1.41980 | -0.38216 |
| C | 4.66507  | 4.04778  | -1.71052 |
| H | 4.95433  | 3.20452  | -2.34378 |
| H | 5.03964  | 4.97517  | -2.13991 |
| H | 5.06644  | 3.91954  | -0.70129 |
| C | -2.13650 | -2.73682 | 1.87962  |
| N | -1.37906 | -1.97580 | 1.44935  |
| C | -3.08310 | -3.69171 | 2.42197  |
| H | -3.84552 | -3.15785 | 2.99499  |
| H | -3.55853 | -4.23771 | 1.60335  |
| H | -2.56180 | -4.39531 | 3.07579  |

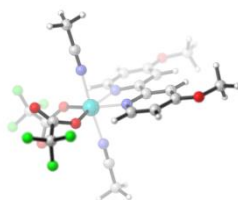

**IntB1**

|   |          |          |          |
|---|----------|----------|----------|
| C | -1.14368 | -2.65572 | 0.12719  |
| C | -2.24690 | -3.48213 | 0.17132  |
| C | -3.52789 | -2.90279 | 0.15077  |
| C | -3.63348 | -1.50399 | 0.08256  |
| C | -2.46994 | -0.74197 | 0.03819  |
| N | -1.24268 | -1.31117 | 0.06358  |
| H | -0.13702 | -3.05599 | 0.13950  |
| H | -2.13793 | -4.55836 | 0.22170  |
| H | -4.60180 | -1.02668 | 0.06646  |
| C | -2.47006 | 0.74222  | -0.04057 |
| C | -3.63372 | 1.50401  | -0.08575 |
| N | -1.24289 | 1.31168  | -0.06501 |
| C | -3.52836 | 2.90283  | -0.15376 |

|    |          |          |          |
|----|----------|----------|----------|
| H  | -4.60195 | 1.02650  | -0.07040 |
| C  | -1.14411 | 2.65624  | -0.12847 |
| C  | -2.24747 | 3.48243  | -0.17338 |
| H  | -0.13751 | 3.05671  | -0.13995 |
| H  | -2.13868 | 4.55869  | -0.22362 |
| Fe | 0.44955  | 0.00046  | 0.00035  |
| O  | 1.63822  | 1.50212  | -0.07663 |
| C  | 2.76507  | 1.79209  | 0.50655  |
| O  | 3.38305  | 1.14869  | 1.33238  |
| O  | 1.63850  | -1.50098 | 0.07931  |
| C  | 2.76462  | -1.79201 | -0.50476 |
| O  | 3.38192  | -1.14984 | -1.33204 |
| C  | 3.30064  | 3.15929  | 0.01089  |
| C  | 3.30010  | -3.15895 | -0.00826 |
| F  | 3.58320  | -3.10603 | 1.30945  |
| F  | 2.37305  | -4.12661 | -0.18949 |
| F  | 4.41153  | -3.52316 | -0.66025 |
| F  | 2.37376  | 4.12698  | 0.19264  |
| F  | 4.41215  | 3.52297  | 0.66303  |
| F  | 3.58370  | 3.10700  | -1.30687 |
| C  | 0.39388  | -0.14439 | -3.29601 |
| N  | 0.37391  | -0.08335 | -2.14152 |
| C  | 0.42022  | -0.22169 | -4.74512 |
| H  | -0.44951 | -0.78149 | -5.09778 |
| H  | 0.39843  | 0.78687  | -5.16516 |
| H  | 1.33358  | -0.72896 | -5.06568 |
| O  | -4.56537 | 3.74429  | -0.20127 |
| O  | -4.56476 | -3.74446 | 0.19766  |
| C  | -5.90308 | -3.21887 | 0.17690  |
| H  | -6.08731 | -2.66143 | -0.74585 |

|   |          |          |          |
|---|----------|----------|----------|
| H | -6.55589 | -4.08893 | 0.21714  |
| H | -6.08380 | -2.58135 | 1.04697  |
| C | -5.90359 | 3.21838  | -0.18131 |
| H | -6.08818 | 2.66080  | 0.74128  |
| H | -6.55657 | 4.08829  | -0.22183 |
| H | -6.08367 | 2.58091  | -1.05154 |
| C | 0.38435  | 0.14356  | 3.29689  |
| N | 0.37021  | 0.08396  | 2.14224  |
| C | 0.40287  | 0.21861  | 4.74620  |
| H | 1.43081  | 0.35708  | 5.09020  |
| H | -0.20762 | 1.06273  | 5.07631  |
| H | 0.00078  | -0.70690 | 5.16566  |

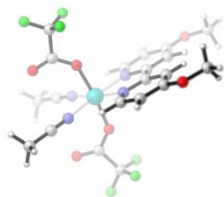

**IntB2**

|   |          |          |          |
|---|----------|----------|----------|
| C | -0.80400 | 0.09856  | -2.65922 |
| C | -1.90842 | 0.14157  | -3.48329 |
| C | -3.18741 | 0.13152  | -2.90030 |
| C | -3.28617 | 0.07693  | -1.50073 |
| C | -2.12123 | 0.03185  | -0.74149 |
| N | -0.89431 | 0.04414  | -1.31410 |
| H | 0.19569  | 0.10729  | -3.07438 |
| H | -1.80012 | 0.18394  | -4.55981 |
| H | -4.25232 | 0.07335  | -1.01911 |
| C | -2.12125 | -0.03130 | 0.74145  |
| C | -3.28620 | -0.07609 | 1.50068  |
| N | -0.89434 | -0.04383 | 1.31408  |

|    |          |          |          |
|----|----------|----------|----------|
| C  | -3.18747 | -0.13057 | 2.90026  |
| H  | -4.25234 | -0.07236 | 1.01904  |
| C  | -0.80405 | -0.09816 | 2.65923  |
| C  | -1.90850 | -0.14085 | 3.48327  |
| H  | 0.19562  | -0.10708 | 3.07441  |
| H  | -1.80023 | -0.18312 | 4.55980  |
| Fe | 0.77165  | -0.00016 | 0.00013  |
| O  | 0.89802  | 1.92877  | 0.05005  |
| C  | 1.86817  | 2.79126  | 0.07667  |
| O  | 3.06969  | 2.59229  | 0.07747  |
| O  | 0.89719  | -1.92912 | -0.05026 |
| C  | 1.86705  | -2.79194 | -0.07693 |
| O  | 3.06864  | -2.59337 | -0.07800 |
| C  | 1.31839  | 4.24083  | 0.11155  |
| C  | 1.31677  | -4.24133 | -0.11157 |
| F  | 0.55028  | -4.48613 | 0.97227  |
| F  | 0.55163  | -4.43386 | -1.20694 |
| F  | 2.30606  | -5.14562 | -0.13254 |
| F  | 0.55306  | 4.43343  | 1.20678  |
| F  | 2.30799  | 5.14477  | 0.13293  |
| F  | 0.55223  | 4.48612  | -0.97241 |
| C  | 3.11475  | -0.04261 | 2.32061  |
| N  | 2.19328  | -0.04051 | 1.62169  |
| C  | 4.26439  | -0.04457 | 3.20499  |
| H  | 4.86524  | 0.84987  | 3.02289  |
| H  | 3.92483  | -0.04858 | 4.24391  |
| H  | 4.86838  | -0.93559 | 3.01691  |
| O  | -4.22670 | -0.17499 | 3.73757  |
| O  | -4.22661 | 0.17631  | -3.73762 |
| C  | -5.56348 | 0.16569  | -3.20678 |



|   |          |          |          |
|---|----------|----------|----------|
| H | -5.73808 | 1.04263  | -2.57714 |
| H | -6.21898 | 0.20023  | -4.07499 |
| H | -5.74862 | -0.75119 | -2.64022 |
| C | -5.56357 | -0.16391 | 3.20671  |
| H | -5.73848 | -1.04079 | 2.57709  |
| H | -6.21909 | -0.19818 | 4.07492  |
| H | -5.74835 | 0.75304  | 2.64012  |
| C | 3.11496  | 0.04184  | -2.32039 |
| N | 2.19335  | 0.03972  | -1.62167 |
| C | 4.26479  | 0.04374  | -3.20454 |
| H | 4.86855  | 0.93496  | -3.01666 |
| H | 4.86580  | -0.85050 | -3.02198 |
| H | 3.92544  | 0.04725  | -4.24353 |

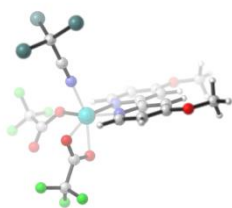

**IntD**

|   |         |          |          |
|---|---------|----------|----------|
| C | 1.82878 | -2.30730 | 0.33518  |
| C | 3.16016 | -2.62300 | 0.49715  |
| C | 4.11609 | -1.59410 | 0.41304  |
| C | 3.67411 | -0.28171 | 0.16976  |
| C | 2.31291 | -0.04834 | 0.01957  |
| N | 1.40110 | -1.04810 | 0.09766  |
| H | 1.06218 | -3.07124 | 0.38688  |
| H | 3.47363 | -3.64221 | 0.68492  |
| H | 4.37958 | 0.53292  | 0.10118  |
| C | 1.73539 | 1.29542  | -0.23483 |
| C | 2.49682 | 2.44856  | -0.36248 |

|    |          |          |          |
|----|----------|----------|----------|
| N  | 0.38135  | 1.32044  | -0.33612 |
| C  | 1.84622  | 3.67166  | -0.60815 |
| H  | 3.57229  | 2.40516  | -0.27692 |
| C  | -0.24374 | 2.49793  | -0.57279 |
| C  | 0.44243  | 3.68267  | -0.71326 |
| H  | -1.32344 | 2.45784  | -0.64637 |
| H  | -0.08090 | 4.61150  | -0.90193 |
| Fe | -0.61525 | -0.47939 | -0.17663 |
| O  | -2.35159 | 0.28414  | -0.21691 |
| C  | -3.43589 | 0.05538  | -0.90874 |
| O  | -3.68112 | -0.89620 | -1.62366 |
| O  | -0.65744 | -1.03027 | -2.18244 |
| C  | -1.05868 | -2.18048 | -1.83902 |
| O  | -1.12850 | -2.49338 | -0.61813 |
| C  | -4.46652 | 1.19570  | -0.72143 |
| C  | -1.41377 | -3.21437 | -2.91920 |
| F  | -1.86542 | -2.61175 | -4.02471 |
| F  | -0.30895 | -3.91648 | -3.23381 |
| F  | -2.34634 | -4.06373 | -2.47389 |
| F  | -3.92481 | 2.37910  | -1.08781 |
| F  | -5.56305 | 0.99290  | -1.45928 |
| F  | -4.83428 | 1.29389  | 0.57021  |
| C  | -1.10289 | -1.12762 | 3.05150  |
| N  | -0.91228 | -0.89636 | 1.93710  |
| C  | -1.34811 | -1.42989 | 4.46787  |
| O  | 2.46198  | 4.84291  | -0.75315 |
| O  | 5.39020  | -1.95068 | 0.57568  |
| C  | 6.42421  | -0.95165 | 0.50522  |
| H  | 6.28807  | -0.19797 | 1.28553  |
| H  | 7.35534  | -1.48986 | 0.67181  |

|    |          |          |          |
|----|----------|----------|----------|
| H  | 6.44114  | -0.48050 | -0.48133 |
| C  | 3.89797  | 4.90966  | -0.66460 |
| H  | 4.36114  | 4.29701  | -1.44256 |
| H  | 4.14685  | 5.95720  | -0.82244 |
| H  | 4.23852  | 4.59267  | 0.32475  |
| Cl | -2.35669 | -0.11669 | 5.14867  |
| Cl | 0.23641  | -1.51526 | 5.29812  |
| Cl | -2.20112 | -3.00207 | 4.55143  |

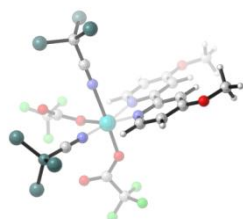

**IntD1**

|   |          |          |          |
|---|----------|----------|----------|
| C | 0.92575  | -0.43756 | 2.82260  |
| C | 1.78932  | -0.39824 | 3.89616  |
| C | 3.17366  | -0.43158 | 3.65226  |
| C | 3.61883  | -0.50816 | 2.32217  |
| C | 2.68059  | -0.54555 | 1.29688  |
| N | 1.34765  | -0.50702 | 1.54254  |
| H | -0.14556 | -0.41131 | 2.97857  |
| H | 1.41585  | -0.34181 | 4.91087  |
| H | 4.67441  | -0.53742 | 2.09753  |
| C | 3.05264  | -0.62439 | -0.13862 |
| C | 4.36554  | -0.67571 | -0.59051 |
| N | 2.00542  | -0.63626 | -0.99876 |
| C | 4.60868  | -0.73882 | -1.97368 |
| H | 5.18590  | -0.66729 | 0.11116  |
| C | 2.23853  | -0.68826 | -2.32925 |
| C | 3.51091  | -0.74025 | -2.85406 |

|    |          |          |          |
|----|----------|----------|----------|
| H  | 1.36288  | -0.67668 | -2.96670 |
| H  | 3.67215  | -0.78151 | -3.92394 |
| Fe | 0.10085  | -0.65224 | -0.17088 |
| O  | -0.77826 | -0.39298 | -1.82532 |
| C  | -1.68755 | 0.37282  | -2.36111 |
| O  | -2.36953 | 1.21972  | -1.82029 |
| O  | -0.15814 | -2.51926 | 0.02163  |
| C  | -1.16505 | -3.29299 | -0.28996 |
| O  | -2.29966 | -2.97048 | -0.57813 |
| C  | -1.84883 | 0.06695  | -3.87122 |
| C  | -0.75043 | -4.78495 | -0.24372 |
| F  | 0.25705  | -5.02095 | -1.10856 |
| F  | -0.32337 | -5.11966 | 0.99032  |
| F  | -1.77413 | -5.58576 | -0.56468 |
| F  | -2.33669 | -1.17664 | -4.04814 |
| F  | -2.68027 | 0.93359  | -4.46103 |
| F  | -0.65506 | 0.13458  | -4.50120 |
| C  | 0.30010  | 2.83117  | -0.11657 |
| N  | 0.23948  | 1.67812  | -0.08565 |
| C  | 0.37430  | 4.29562  | -0.15865 |
| O  | 5.81842  | -0.79448 | -2.53113 |
| O  | 3.97034  | -0.38680 | 4.72147  |
| C  | 5.39816  | -0.40937 | 4.54317  |
| H  | 5.72971  | 0.45588  | 3.96236  |
| H  | 5.81456  | -0.36011 | 5.54749  |
| H  | 5.71362  | -1.33680 | 4.05735  |
| C  | 6.98894  | -0.79463 | -1.69333 |
| H  | 6.98879  | -1.66218 | -1.02779 |
| H  | 7.83254  | -0.85601 | -2.37815 |
| H  | 7.05007  | 0.13042  | -1.11341 |

|    |          |          |          |
|----|----------|----------|----------|
| C  | -2.81305 | -0.08147 | 1.34271  |
| N  | -1.72196 | -0.22249 | 0.99321  |
| C  | -4.19983 | 0.09797  | 1.79005  |
| Cl | 1.02056  | 4.86993  | 1.41252  |
| Cl | 1.46869  | 4.75869  | -1.50174 |
| Cl | -1.27659 | 4.93392  | -0.43688 |
| Cl | -4.84041 | 1.58774  | 1.03202  |
| Cl | -4.18760 | 0.24511  | 3.57691  |
| Cl | -5.13944 | -1.33603 | 1.27543  |

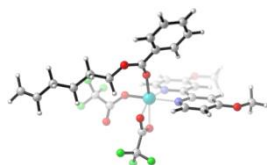

**IntC**

|   |          |          |          |
|---|----------|----------|----------|
| C | 2.49131  | -1.96743 | 0.48780  |
| C | 3.85432  | -2.15434 | 0.58019  |
| C | 4.70566  | -1.06372 | 0.32713  |
| C | 4.13234  | 0.17440  | -0.00749 |
| C | 2.74740  | 0.27682  | -0.07988 |
| N | 1.93780  | -0.78034 | 0.16282  |
| H | 1.80195  | -2.78424 | 0.66661  |
| H | 4.26989  | -3.11948 | 0.84154  |
| H | 4.75524  | 1.03415  | -0.20351 |
| C | 2.03818  | 1.53705  | -0.41794 |
| C | 2.69114  | 2.72348  | -0.72749 |
| N | 0.68480  | 1.45078  | -0.40365 |
| C | 1.92667  | 3.86353  | -1.03088 |
| H | 3.77000  | 2.76554  | -0.73627 |
| C | -0.04951 | 2.54724  | -0.69951 |

|    |          |          |          |
|----|----------|----------|----------|
| C  | 0.52364  | 3.76025  | -1.01186 |
| H  | -1.12470 | 2.41821  | -0.68114 |
| H  | -0.08792 | 4.62327  | -1.24327 |
| Fe | -0.15207 | -0.40906 | 0.02286  |
| O  | -1.94609 | 0.20233  | -0.27127 |
| C  | -2.96226 | -0.17713 | -0.99022 |
| O  | -3.06542 | -1.15978 | -1.70055 |
| O  | -0.04410 | -1.10876 | -2.02143 |
| C  | -0.38823 | -2.23334 | -1.58352 |
| O  | -0.50201 | -2.43857 | -0.33462 |
| C  | -4.16040 | 0.78875  | -0.81213 |
| C  | -0.62288 | -3.40343 | -2.55162 |
| F  | -0.93272 | -2.96153 | -3.77548 |
| F  | 0.50409  | -4.13788 | -2.63503 |
| F  | -1.61112 | -4.19408 | -2.11313 |
| F  | -3.78645 | 2.07009  | -1.00619 |
| F  | -5.15390 | 0.50882  | -1.66152 |
| F  | -4.64392 | 0.69059  | 0.44913  |
| O  | 2.43155  | 5.05737  | -1.34327 |
| O  | 6.01677  | -1.29327 | 0.42799  |
| C  | 6.94402  | -0.22247 | 0.17550  |
| H  | 6.79365  | 0.59635  | 0.88474  |
| H  | 7.93170  | -0.65659 | 0.31909  |
| H  | 6.84581  | 0.14156  | -0.85108 |
| C  | 3.85898  | 5.23529  | -1.39305 |
| H  | 4.30288  | 4.59032  | -2.15640 |
| H  | 4.00946  | 6.27948  | -1.66038 |
| H  | 4.30871  | 5.03509  | -0.41679 |
| C  | 2.39826  | 0.04460  | 5.13812  |
| C  | 1.51555  | -0.10748 | 4.07401  |

|   |          |          |         |
|---|----------|----------|---------|
| C | 0.33680  | -0.85305 | 4.24587 |
| C | 0.04854  | -1.44187 | 5.49015 |
| C | 0.93856  | -1.28658 | 6.54750 |
| C | 2.11147  | -0.54514 | 6.37291 |
| H | 3.30762  | 0.62156  | 5.00761 |
| H | 1.72499  | 0.34955  | 3.11415 |
| H | -0.86203 | -2.01469 | 5.61782 |
| H | 0.71982  | -1.74196 | 7.50755 |
| H | 2.80263  | -0.42597 | 7.20144 |
| C | -0.58299 | -1.00737 | 3.11044 |
| O | -0.33764 | -0.51081 | 1.98424 |
| O | -1.67742 | -1.67961 | 3.36133 |
| C | -2.69442 | -1.83493 | 2.31539 |
| C | -3.89857 | -2.51070 | 2.94348 |
| H | -2.25835 | -2.43321 | 1.51208 |
| H | -2.93592 | -0.84024 | 1.93693 |
| C | -5.02093 | -2.69860 | 1.91233 |
| H | -3.59796 | -3.48156 | 3.35413 |
| H | -4.25629 | -1.89950 | 3.78025 |
| C | -6.27666 | -3.34898 | 2.52178 |
| H | -5.28956 | -1.72824 | 1.47737 |
| H | -4.65687 | -3.31971 | 1.08333 |
| H | -5.98588 | -4.30820 | 2.97463 |
| H | -6.66245 | -2.72021 | 3.33353 |
| C | -7.35856 | -3.58789 | 1.50414 |
| C | -8.58461 | -3.06435 | 1.54668 |
| H | -7.08940 | -4.23918 | 0.67100 |
| H | -9.32257 | -3.27366 | 0.77756 |
| H | -8.89631 | -2.40838 | 2.35670 |

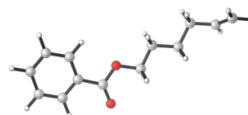

**1**

|   |          |         |          |
|---|----------|---------|----------|
| C | 0.26672  | 2.10723 | 1.09541  |
| C | 1.63864  | 1.86713 | 1.09282  |
| C | 2.40242  | 2.15593 | -0.04710 |
| C | 1.77964  | 2.68806 | -1.18584 |
| C | 0.40621  | 2.92687 | -1.17938 |
| C | -0.35101 | 2.63746 | -0.04100 |
| H | -0.32077 | 1.88222 | 1.98011  |
| H | 2.13526  | 1.45635 | 1.96499  |
| H | 2.37070  | 2.91097 | -2.06631 |
| H | -0.07368 | 3.33862 | -2.06179 |
| H | -1.42064 | 2.82473 | -0.03938 |
| C | 3.86663  | 1.87974 | 0.00275  |
| O | 4.44410  | 1.41439 | 0.97218  |
| O | 4.49454  | 2.19972 | -1.14445 |
| C | 5.92361  | 1.96359 | -1.18631 |
| C | 6.41991  | 2.38445 | -2.55961 |
| H | 6.11099  | 0.90271 | -0.99232 |
| H | 6.39926  | 2.54026 | -0.38668 |
| C | 7.93139  | 2.17352 | -2.71282 |
| H | 5.88382  | 1.81020 | -3.32524 |
| H | 6.17177  | 3.44070 | -2.72096 |
| C | 8.45107  | 2.60166 | -4.09809 |
| H | 8.46585  | 2.73887 | -1.93863 |
| H | 8.17369  | 1.11535 | -2.54634 |

|   |          |         |          |   |          |         |          |
|---|----------|---------|----------|---|----------|---------|----------|
| H | 7.89242  | 2.04522 | -4.86513 | H | 10.23836 | 1.30649 | -4.17403 |
| H | 8.23662  | 3.66506 | -4.26139 | H | 11.89385 | 3.03039 | -4.63961 |
| C | 9.92303  | 2.34648 | -4.27406 | H | 10.57538 | 4.32869 | -4.63199 |
| C | 10.84257 | 3.27937 | -4.52621 |   |          |         |          |

**Table S2.** Cartesian coordinates of the optimized structures.

**TD-DFT calculations of active species (IntB):** The strongest absorption peak in range of experimental blue LEDs.

Excited State 9: 2.7293 eV 454.27 nm f = 0.0269 <S\*\*2> = 8.830

|             |          |
|-------------|----------|
| 140B ->146B | -0.29224 |
| 140B ->147B | -0.13503 |
| 141B ->145B | 0.47187  |
| 141B ->146B | 0.24184  |
| 141B ->147B | -0.24184 |
| 142B ->145B | -0.37854 |
| 142B ->146B | -0.44382 |
| 142B ->147B | -0.25705 |
| 143B ->145B | 0.24768  |
| 143B ->146B | -0.17240 |
| 143B ->147B | 0.18416  |

**Table S3.** TD-DFT calculations of active species IntB.

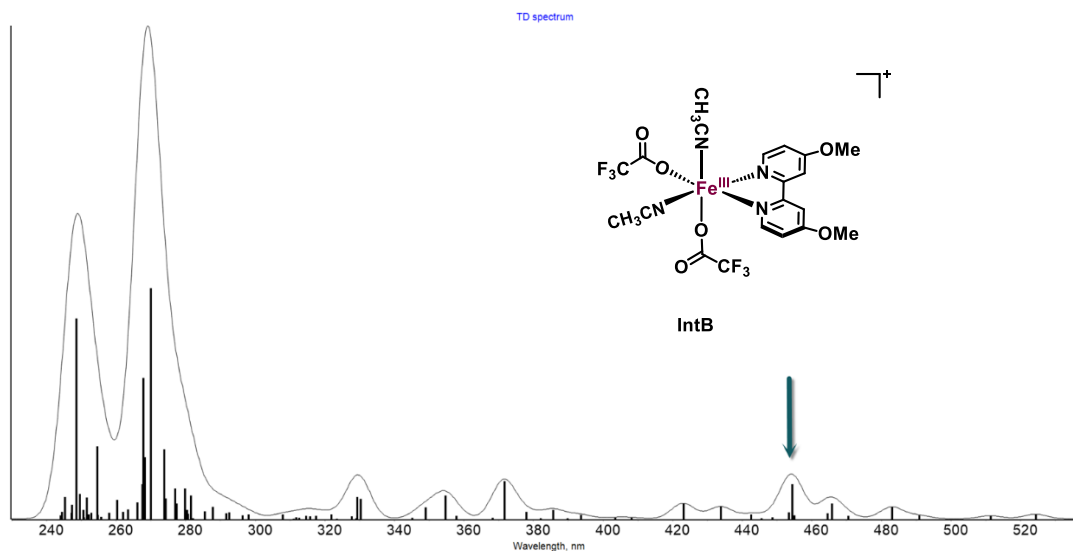

**Figure S21.** The calculated UV-Vis absorption spectrum of **IntB**.

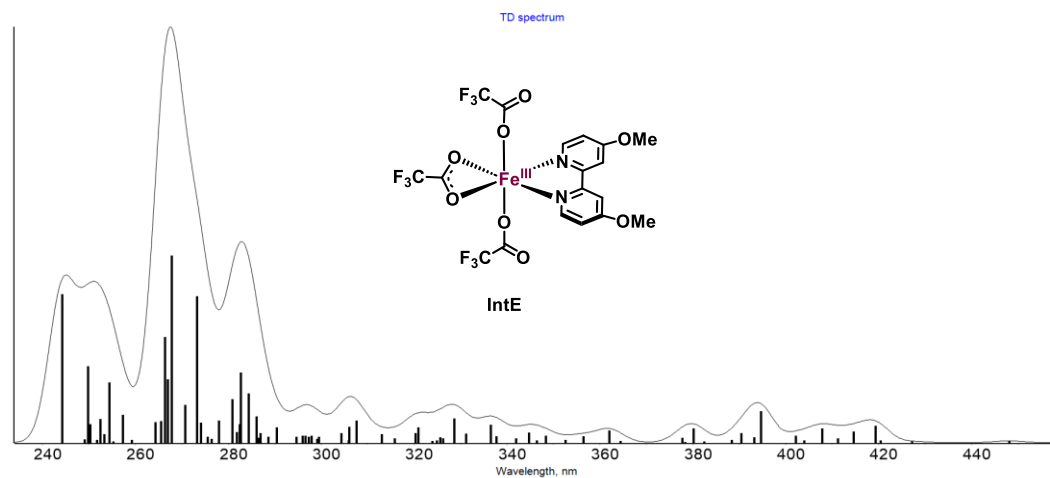

**Figure S22.** The calculated UV-Vis absorption spectrum of **IntE**.

The neutral species **IntE** did not show obvious blue light absorption (Figure S22), and its excited state would not undergo effective LMCT due to the weak oxidizing ability.

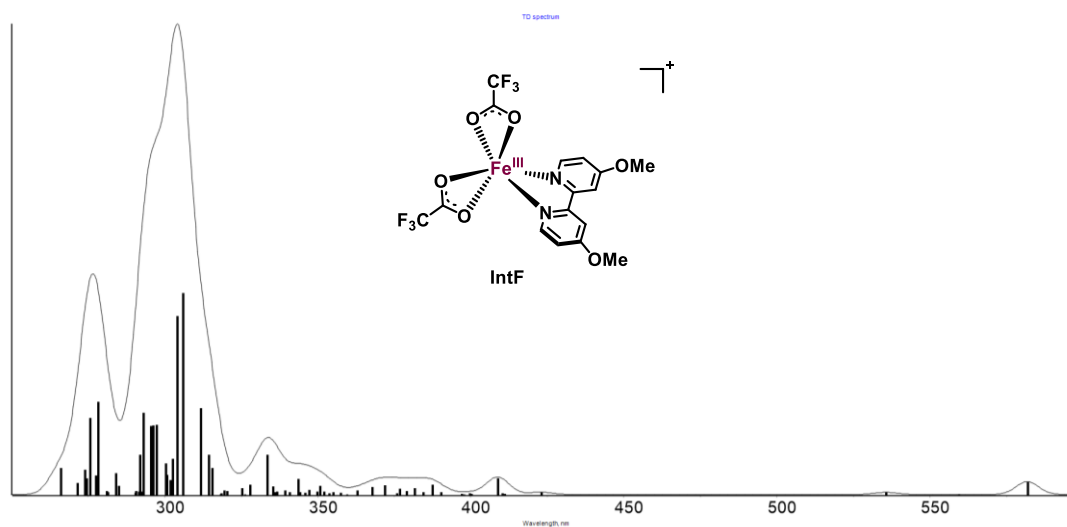

**Figure S23.** The calculated UV-Vis absorption spectrum of **IntF**.

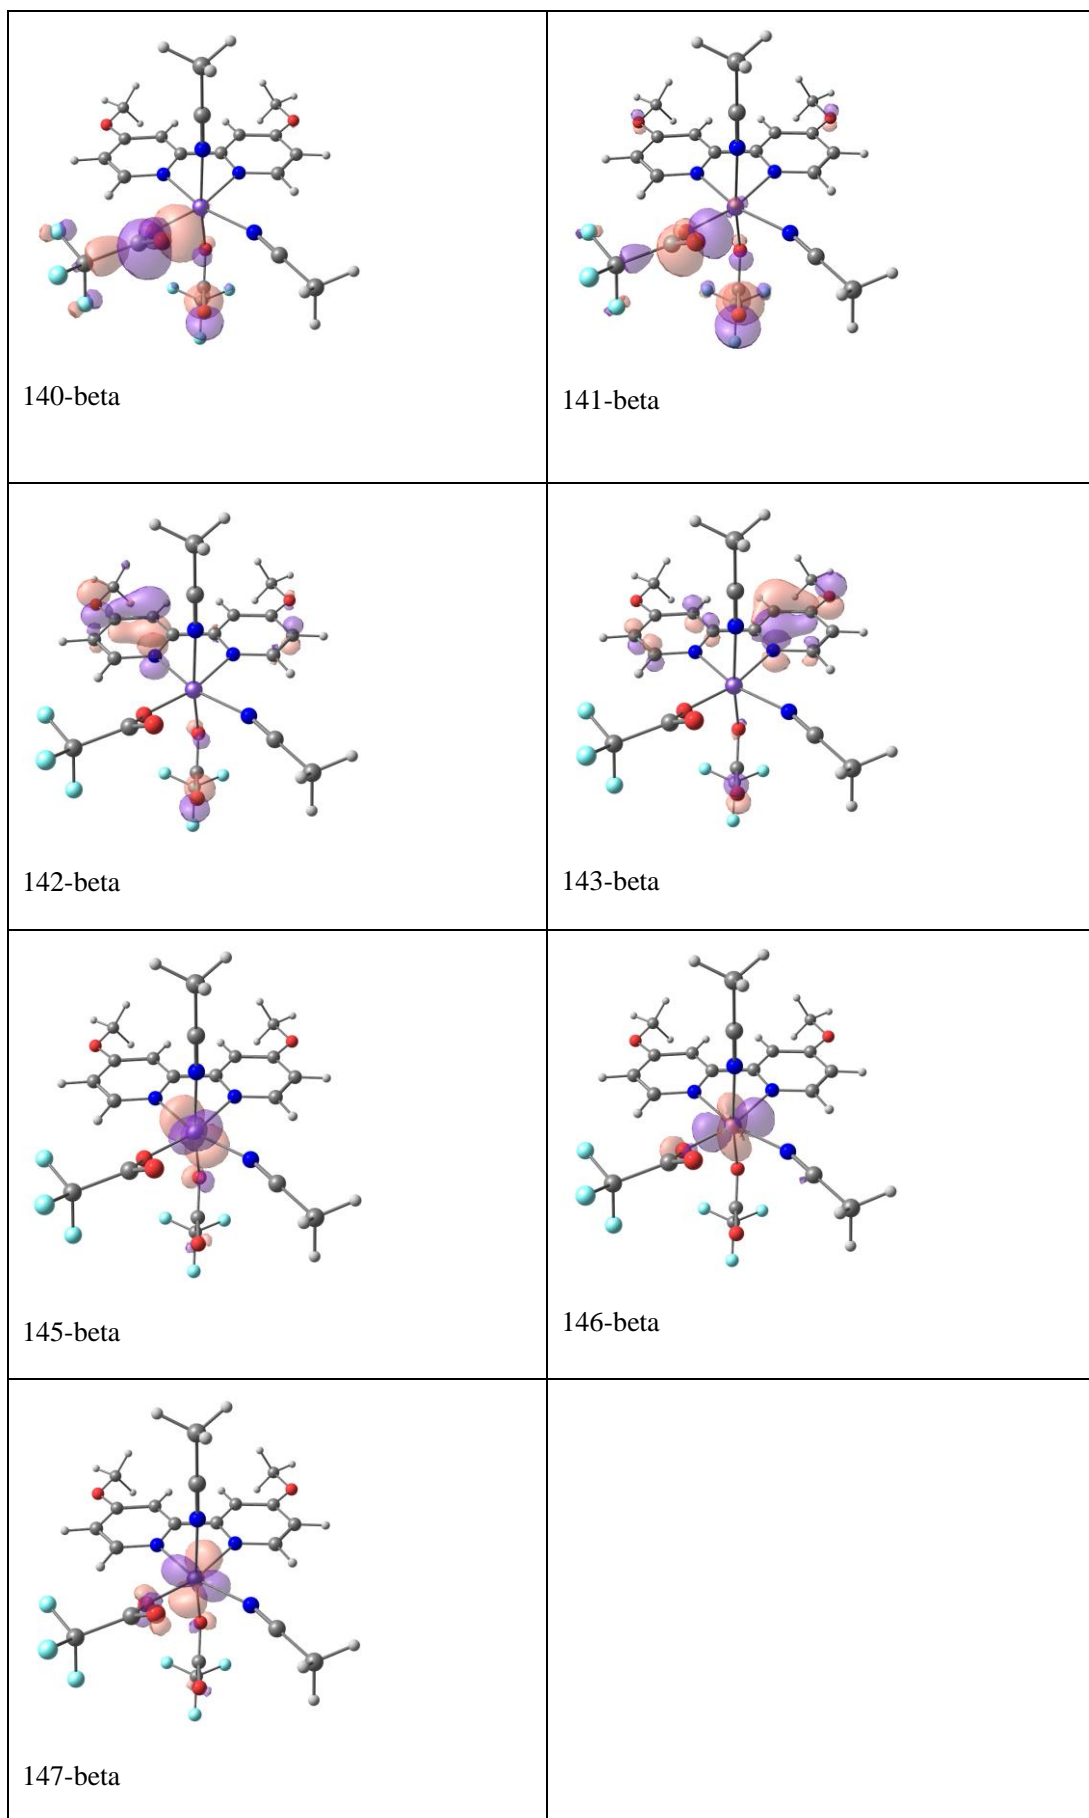

**Figure S24.** The key orbitals for the most possible absorption peak.

**Free energies of the key species in the calculations**

| Species                | Gibbs free energy | Gibbs free energy with the Fang's entropy correction |
|------------------------|-------------------|------------------------------------------------------|
| <b>IntB</b>            | -3305.701959      | -3305.69224                                          |
| <b>TS-B</b>            | -2779.530112      | -2779.5203                                           |
| <b>CF<sub>3</sub>'</b> | -337.56521        | -337.55589                                           |
| <b>CO<sub>2</sub></b>  | -188.590143       | -188.5811435                                         |
| <b>Int1</b>            | -655.279172       | -655.26883                                           |
| <b>2-ts</b>            | -992.83103        | -992.82083                                           |
| <b>Int3</b>            | -992.88293        | -992.87267                                           |
| <b>Int4</b>            | -1511.51048       | -1511.49973                                          |
| <b>5-ts</b>            | -2504.37128       | -2504.36133                                          |
| <b>Int6</b>            | -1051.29444       | -1051.28358                                          |
| <b>Product</b>         | -1453.13961       | -1453.12941                                          |
| <b>7-ts</b>            | -1706.53846       | -1706.52833                                          |
| <b>2b-ts</b>           | -1706.53846       | -1706.52833                                          |
| <b>Int2b</b>           | -1706.56759       | -1706.55746                                          |

**Table S4.** Free energies of the key species in the calculations.



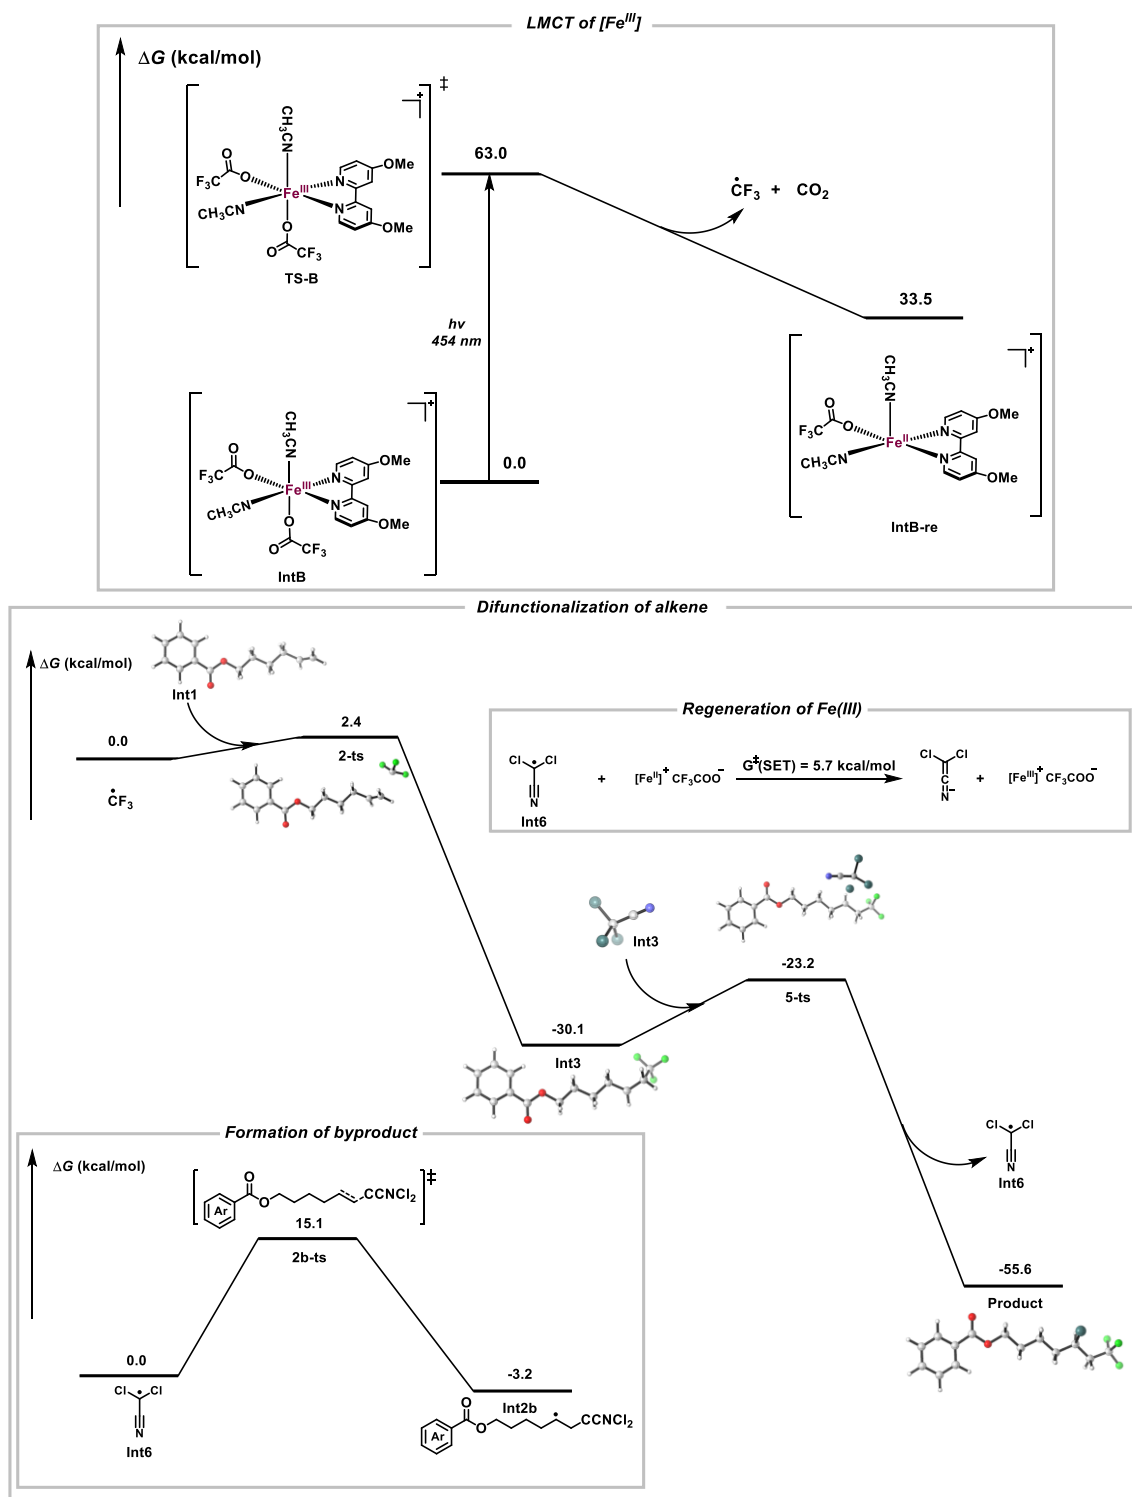

**Figure S25.** Detailed mechanism description.

Through DFT calculations, we can conclude that the  $\text{CCl}_2\text{CN}$  radical is responsible for the oxidation of iron(II) to regenerate iron(III) under the standard catalytic condition (Figure S25). As we can see, the addition of  $\text{CF}_3$  radical to alkene **1** ( $\Delta G = 2.4$  kcal/mol) and the oxidation of iron(II) to iron(III) by  $\text{CCl}_2\text{CN}$  radical ( $\Delta G = 5.7$  kcal/mol) should both occur prior to the radical relay between  $\text{CCl}_2\text{CN}$  radical and **1** ( $\Delta G = 15.1$  kcal/mol). Therefore, compared to the stoichiometric reaction, the iron photocatalyzed condition that involves the oxidation of iron(II) to iron(III) by  $\text{CCl}_2\text{CN}$  radical can avoid the formation of  $\text{CCl}_2\text{CN}$  radical addition by-product.

| Species        | Energy       |
|----------------|--------------|
| <b>IntB</b>    | -2779.802282 |
| <b>IntB-re</b> | -3306.15977  |
| <b>Int6</b>    | -1051.278898 |
| <b>Product</b> | -1051.423348 |
| <b>IntB-ox</b> | -3305.990416 |

**Table S5.** Energy for the relevant species.

### Cartesian coordination of the key species

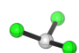

#### CF<sub>3</sub>

|   |          |         |          |
|---|----------|---------|----------|
| C | -0.07951 | 0.96759 | -3.78974 |
| F | -0.19969 | 2.28854 | -3.82591 |
| F | 1.08347  | 0.57756 | -4.29574 |
| F | -1.09408 | 0.37638 | -4.40765 |

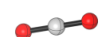

#### CO<sub>2</sub>

|   |          |         |          |
|---|----------|---------|----------|
| O | -1.35731 | 0.21979 | -2.17243 |
| C | -0.22717 | 0.40175 | -1.93515 |
| O | 0.90278  | 0.58339 | -1.69692 |

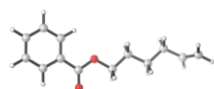

#### Int1

|   |          |         |          |
|---|----------|---------|----------|
| C | 0.26672  | 2.10723 | 1.09541  |
| C | 1.63864  | 1.86713 | 1.09282  |
| C | 2.40242  | 2.15593 | -0.04710 |
| C | 1.77964  | 2.68806 | -1.18584 |
| C | 0.40621  | 2.92687 | -1.17938 |
| C | -0.35101 | 2.63746 | -0.04100 |
| H | -0.32077 | 1.88222 | 1.98011  |
| H | 2.13526  | 1.45635 | 1.96499  |
| H | 2.37070  | 2.91097 | -2.06631 |
| H | -0.07368 | 3.33862 | -2.06179 |
| H | -1.42064 | 2.82473 | -0.03938 |
| C | 3.86663  | 1.87974 | 0.00275  |
| O | 4.44410  | 1.41439 | 0.97218  |
| O | 4.49454  | 2.19972 | -1.14445 |
| C | 5.92361  | 1.96359 | -1.18631 |
| C | 6.41991  | 2.38445 | -2.55961 |

|   |          |         |          |
|---|----------|---------|----------|
| H | 6.11099  | 0.90271 | -0.99232 |
| H | 6.39926  | 2.54026 | -0.38668 |
| C | 7.93139  | 2.17352 | -2.71282 |
| H | 5.88382  | 1.81020 | -3.32524 |
| H | 6.17177  | 3.44070 | -2.72096 |
| C | 8.45107  | 2.60166 | -4.09809 |
| H | 8.46585  | 2.73887 | -1.93863 |
| H | 8.17369  | 1.11535 | -2.54634 |
| H | 7.89242  | 2.04522 | -4.86513 |
| H | 8.23662  | 3.66506 | -4.26139 |
| C | 9.92303  | 2.34648 | -4.27406 |
| C | 10.84257 | 3.27937 | -4.52621 |
| H | 10.23836 | 1.30649 | -4.17403 |
| H | 11.89385 | 3.03039 | -4.63961 |
| H | 10.57538 | 4.32869 | -4.63199 |

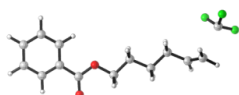

**2-ts**

|   |         |          |         |
|---|---------|----------|---------|
| C | 7.15945 | 0.06788  | 0.34764 |
| C | 6.04774 | 0.90685  | 0.35295 |
| C | 4.75515 | 0.36409  | 0.32340 |
| C | 4.58535 | -1.02794 | 0.28842 |
| C | 5.70057 | -1.86433 | 0.28314 |
| C | 6.98692 | -1.31891 | 0.31268 |
| H | 8.15833 | 0.49235  | 0.37063 |
| H | 6.16181 | 1.98496  | 0.37987 |
| H | 3.58613 | -1.44656 | 0.26568 |

|   |          |          |          |
|---|----------|----------|----------|
| H | 5.56672  | -2.94128 | 0.25600  |
| H | 7.85343  | -1.97336 | 0.30850  |
| C | 3.59977  | 1.30625  | 0.33075  |
| O | 3.70605  | 2.52180  | 0.36036  |
| O | 2.41250  | 0.67161  | 0.30119  |
| C | 1.23126  | 1.51045  | 0.30714  |
| C | 0.01782  | 0.59636  | 0.26649  |
| H | 1.26829  | 2.17744  | -0.55999 |
| H | 1.24426  | 2.13064  | 1.20902  |
| C | -1.29584 | 1.38795  | 0.27260  |
| H | 0.07126  | -0.03008 | -0.63236 |
| H | 0.05068  | -0.07983 | 1.12949  |
| C | -2.53484 | 0.47362  | 0.23217  |
| H | -1.34427 | 2.02025  | 1.16826  |
| H | -1.32011 | 2.06807  | -0.58913 |
| H | -2.46593 | -0.16782 | -0.65962 |
| H | -2.53186 | -0.19651 | 1.10051  |
| C | -3.82544 | 1.23678  | 0.18165  |
| C | -4.85437 | 1.07201  | 1.04008  |
| H | -3.93652 | 1.93978  | -0.64446 |
| H | -5.74351 | 1.69210  | 0.98217  |
| H | -4.75588 | 0.44312  | 1.92115  |
| C | -6.13890 | -0.79522 | 0.05884  |
| F | -7.21620 | -0.33746 | -0.58584 |
| F | -6.51586 | -1.64280 | 1.02215  |
| F | -5.33111 | -1.42093 | -0.80101 |

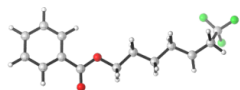

### Int3

|   |          |         |          |
|---|----------|---------|----------|
| C | 0.14643  | 2.22592 | 1.14119  |
| C | 1.50800  | 1.93346 | 1.16101  |
| C | 2.30195  | 2.19791 | 0.03583  |
| C | 1.71975  | 2.75829 | -1.11081 |
| C | 0.35655  | 3.04945 | -1.12677 |
| C | -0.43078 | 2.78435 | -0.00299 |
| H | -0.46451 | 2.01970 | 2.01450  |
| H | 1.97338  | 1.49988 | 2.03940  |
| H | 2.33406  | 2.96211 | -1.97989 |
| H | -0.09191 | 3.48296 | -2.01527 |
| H | -1.49233 | 3.01244 | -0.01875 |
| C | 3.75348  | 1.86595 | 0.10952  |
| O | 4.29600  | 1.37564 | 1.08677  |
| O | 4.41311  | 2.16567 | -1.02539 |
| C | 5.83228  | 1.87392 | -1.04321 |
| C | 6.36829  | 2.27607 | -2.40709 |
| H | 5.97467  | 0.80638 | -0.84769 |
| H | 6.31631  | 2.43083 | -0.23461 |
| C | 7.87213  | 2.00460 | -2.53390 |
| H | 5.82299  | 1.72440 | -3.18275 |
| H | 6.16519  | 3.34153 | -2.57093 |
| C | 8.43320  | 2.40495 | -3.90788 |
| H | 8.41485  | 2.54879 | -1.75049 |
| H | 8.06871  | 0.93779 | -2.36296 |

|   |          |         |          |
|---|----------|---------|----------|
| H | 7.85137  | 1.88479 | -4.69060 |
| H | 8.25572  | 3.47539 | -4.08627 |
| C | 9.88674  | 2.10148 | -4.06667 |
| C | 10.74588 | 2.81624 | -5.06092 |
| H | 10.28788 | 1.20654 | -3.59760 |
| H | 11.80750 | 2.72504 | -4.80960 |
| H | 10.50295 | 3.88477 | -5.10244 |
| C | 10.59748 | 2.29538 | -6.48209 |
| F | 10.91897 | 0.98457 | -6.57966 |
| F | 11.39734 | 2.96542 | -7.34553 |
| F | 9.32795  | 2.42477 | -6.93980 |

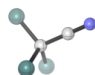

### Int4

|    |          |          |          |
|----|----------|----------|----------|
| C  | -0.81019 | 1.09728  | 0.00580  |
| N  | 0.34969  | 1.09807  | 0.00495  |
| C  | -2.27266 | 1.09708  | 0.00531  |
| Cl | -2.85192 | -0.60364 | -0.05964 |
| Cl | -2.85228 | 1.89122  | 1.51068  |
| Cl | -2.85143 | 2.00354  | -1.43526 |

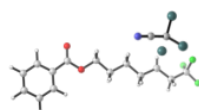

### 5-ts

|   |          |          |          |
|---|----------|----------|----------|
| C | -7.09199 | 0.33838  | -0.08247 |
| C | -5.87091 | 1.00740  | -0.04883 |
| C | -4.67031 | 0.28294  | -0.05030 |
| C | -4.70312 | -1.11901 | -0.08561 |
| C | -5.92734 | -1.78494 | -0.11914 |

|   |          |          |          |
|---|----------|----------|----------|
| C | -7.12139 | -1.05879 | -0.11765 |
| H | -8.01912 | 0.90307  | -0.08121 |
| H | -5.82817 | 2.09068  | -0.02114 |
| H | -3.77477 | -1.67797 | -0.08668 |
| H | -5.95041 | -2.86993 | -0.14642 |
| H | -8.07323 | -1.58077 | -0.14385 |
| C | -3.39142 | 1.04778  | -0.01392 |
| O | -3.32066 | 2.26574  | 0.01662  |
| O | -2.30770 | 0.24788  | -0.01879 |
| C | -1.01950 | 0.90836  | 0.01363  |
| C | 0.04989  | -0.17134 | -0.01609 |
| H | -0.95794 | 1.51805  | 0.92064  |
| H | -0.94491 | 1.57928  | -0.84796 |
| C | 1.46179  | 0.42722  | 0.01044  |
| H | -0.09030 | -0.83739 | 0.84393  |
| H | -0.08299 | -0.78103 | -0.91810 |
| C | 2.54862  | -0.65426 | -0.01516 |
| H | 1.59670  | 1.09263  | -0.85207 |
| H | 1.58461  | 1.04498  | 0.90665  |
| H | 2.45050  | -1.32688 | 0.84708  |
| H | 2.39201  | -1.29637 | -0.90102 |
| C | 3.95207  | -0.14493 | -0.10853 |
| C | 5.06416  | -1.15237 | -0.13518 |
| H | 4.10836  | 0.76681  | -0.68130 |
| H | 4.82931  | -1.91536 | -0.89156 |
| H | 5.15127  | -1.68404 | 0.81790  |
| C | 6.42353  | -0.59588 | -0.50212 |
| F | 6.38257  | 0.08158  | -1.67437 |
| F | 7.32289  | -1.59470 | -0.64666 |

|    |         |         |         |
|----|---------|---------|---------|
| F  | 6.91622 | 0.25219 | 0.42514 |
| C  | 4.50988 | 1.88820 | 3.80320 |
| C  | 3.19401 | 1.92474 | 4.39752 |
| N  | 2.12161 | 1.93758 | 4.84597 |
| Cl | 5.13509 | 3.52350 | 3.51753 |
| Cl | 4.25558 | 0.98812 | 1.99526 |
| Cl | 5.62324 | 0.89247 | 4.76001 |

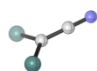

### Int6

|    |          |         |          |
|----|----------|---------|----------|
| C  | -3.64616 | 2.84247 | -0.25751 |
| C  | -2.35786 | 3.26561 | -0.56035 |
| N  | -1.27062 | 3.62380 | -0.81635 |
| Cl | -4.18799 | 2.81267 | 1.36750  |
| Cl | -4.71032 | 2.34420 | -1.50413 |

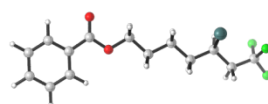

### Product

|   |         |          |          |
|---|---------|----------|----------|
| C | 8.68152 | 0.49170  | 0.09723  |
| C | 7.43767 | 0.66702  | 0.69877  |
| C | 6.29677 | 0.06839  | 0.14532  |
| C | 6.41235 | -0.70825 | -1.01711 |
| C | 7.65911 | -0.88131 | -1.61623 |
| C | 8.79347 | -0.28284 | -1.06112 |
| H | 9.56228 | 0.95684  | 0.52892  |
| H | 7.33111 | 1.26424  | 1.59772  |

|    |          |          |          |
|----|----------|----------|----------|
| H  | 5.53001  | -1.17032 | -1.44399 |
| H  | 7.74632  | -1.48270 | -2.51578 |
| H  | 9.76311  | -0.41976 | -1.53039 |
| C  | 4.99024  | 0.28761  | 0.82856  |
| O  | 4.84822  | 0.95677  | 1.83928  |
| O  | 3.96940  | -0.33587 | 0.20955  |
| C  | 2.65981  | -0.17691 | 0.80711  |
| C  | 1.66958  | -0.95469 | -0.04421 |
| H  | 2.41573  | 0.88942  | 0.84421  |
| H  | 2.69371  | -0.54988 | 1.83569  |
| C  | 0.24150  | -0.85039 | 0.50704  |
| H  | 1.70265  | -0.57100 | -1.07115 |
| H  | 1.98153  | -2.00536 | -0.08509 |
| C  | -0.76279 | -1.63027 | -0.34784 |
| H  | 0.21482  | -1.23388 | 1.53567  |
| H  | -0.05692 | 0.20268  | 0.55683  |
| H  | -0.76428 | -1.25141 | -1.37698 |
| H  | -0.44743 | -2.68093 | -0.39982 |
| C  | -2.19366 | -1.63537 | 0.18927  |
| C  | -3.10789 | -2.54898 | -0.62673 |
| H  | -2.20755 | -1.93428 | 1.23889  |
| H  | -2.59996 | -3.51261 | -0.73595 |
| H  | -3.27469 | -2.14948 | -1.63022 |
| C  | -4.45499 | -2.85980 | -0.00733 |
| F  | -4.33304 | -3.26386 | 1.28018  |
| F  | -5.06057 | -3.86308 | -0.68502 |
| F  | -5.30752 | -1.81348 | -0.01422 |
| Cl | -2.86558 | 0.08676  | 0.20782  |

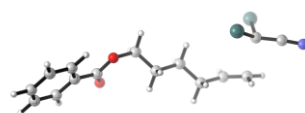

**2b-ts**

|   |          |          |          |
|---|----------|----------|----------|
| C | 5.07266  | -1.17410 | 0.98958  |
| C | 3.76322  | -0.76442 | 1.22878  |
| C | 2.73522  | -1.14348 | 0.35348  |
| C | 3.03032  | -1.93803 | -0.76437 |
| C | 4.34220  | -2.34619 | -1.00016 |
| C | 5.36347  | -1.96561 | -0.12539 |
| H | 5.86547  | -0.87835 | 1.66959  |
| H | 3.51855  | -0.15027 | 2.08847  |
| H | 2.23507  | -2.23105 | -1.43956 |
| H | 4.56830  | -2.96098 | -1.86583 |
| H | 6.38426  | -2.28544 | -0.31213 |
| C | 1.35181  | -0.67769 | 0.65560  |
| O | 1.05910  | 0.01442  | 1.61725  |
| O | 0.45425  | -1.10263 | -0.25701 |
| C | -0.92778 | -0.71240 | -0.05843 |
| C | -1.65499 | -1.69300 | 0.85497  |
| H | -1.35790 | -0.71193 | -1.06255 |
| H | -0.95441 | 0.30185  | 0.34640  |
| C | -3.14256 | -1.34593 | 0.99356  |
| H | -1.54277 | -2.70587 | 0.44954  |
| H | -1.17678 | -1.68302 | 1.84103  |
| C | -3.88776 | -2.32972 | 1.91753  |
| H | -3.24956 | -0.32844 | 1.39141  |
| H | -3.61750 | -1.34714 | 0.00510  |
| H | -3.79799 | -3.35359 | 1.53658  |
| H | -3.38902 | -2.31825 | 2.90012  |

|    |          |          |          |
|----|----------|----------|----------|
| C  | -5.32750 | -1.98056 | 2.12294  |
| C  | -6.38031 | -2.84981 | 1.97481  |
| H  | -5.54451 | -0.94429 | 2.37989  |
| H  | -7.36058 | -2.56934 | 2.34687  |
| H  | -6.19110 | -3.91540 | 1.87716  |
| C  | -7.12324 | -2.73246 | -0.13101 |
| C  | -8.25399 | -3.58971 | -0.04265 |
| N  | -9.16079 | -4.30616 | 0.11921  |
| Cl | -7.52562 | -1.04216 | -0.42095 |
| Cl | -5.83165 | -3.35974 | -1.15217 |

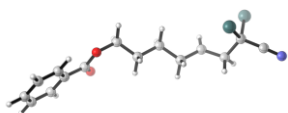

### Int2b

|   |          |          |          |
|---|----------|----------|----------|
| C | -7.34997 | -0.41334 | 0.87151  |
| C | -6.11010 | -0.93371 | 0.50866  |
| C | -5.11228 | -0.08891 | 0.00152  |
| C | -5.36689 | 1.28355  | -0.13807 |
| C | -6.60899 | 1.80062  | 0.22680  |
| C | -7.60064 | 0.95473  | 0.73094  |
| H | -8.11975 | -1.07091 | 1.26326  |
| H | -5.89707 | -1.99215 | 0.61075  |
| H | -4.59481 | 1.93571  | -0.52888 |
| H | -6.80381 | 2.86302  | 0.11811  |

|    |          |          |          |
|----|----------|----------|----------|
| H  | -8.56708 | 1.36098  | 1.01397  |
| C  | -3.80368 | -0.69761 | -0.37176 |
| O  | -3.54641 | -1.88527 | -0.25798 |
| O  | -2.93241 | 0.21059  | -0.85610 |
| C  | -1.62085 | -0.27041 | -1.24454 |
| C  | -0.66087 | -0.28115 | -0.06026 |
| H  | -1.29127 | 0.42928  | -2.01606 |
| H  | -1.72469 | -1.26646 | -1.68080 |
| C  | 0.75417  | -0.70092 | -0.47607 |
| H  | -0.63858 | 0.71985  | 0.38774  |
| H  | -1.04438 | -0.96878 | 0.70226  |
| C  | 1.73799  | -0.71519 | 0.70397  |
| H  | 0.72339  | -1.70035 | -0.92980 |
| H  | 1.13119  | -0.02011 | -1.24995 |
| H  | 1.78169  | 0.28163  | 1.16644  |
| H  | 1.33448  | -1.37743 | 1.49250  |
| C  | 3.11285  | -1.15730 | 0.32504  |
| C  | 4.29804  | -0.89305 | 1.19167  |
| H  | 3.24369  | -1.81130 | -0.53267 |
| H  | 4.76952  | -1.82738 | 1.52904  |
| H  | 4.01302  | -0.33206 | 2.08790  |
| C  | 5.43352  | -0.08216 | 0.51402  |
| C  | 6.54675  | 0.15128  | 1.43812  |
| N  | 7.40613  | 0.31875  | 2.19978  |
| Cl | 6.10087  | -0.98014 | -0.92120 |
| Cl | 4.82469  | 1.54331  | -0.03005 |

**Table S6.** The coordination of the key species involved.

**General procedure for UV-Vis experiments:** UV-Vis absorption spectra were recorded in CH<sub>3</sub>CN ( 1.0 mL) in 1 cm path quartz cuvettes using an Agilent 8453 spectrophotometer. Fe(OTf)<sub>3</sub> (0.01 mmol), **Ligand** (0.01 mmol), CF<sub>3</sub>COONa (0.02 mmol) in 1.0 mL CH<sub>3</sub>CN. The solution was stirred under darkness or 450 nm blue LEDs illumination and diluted before measurement.

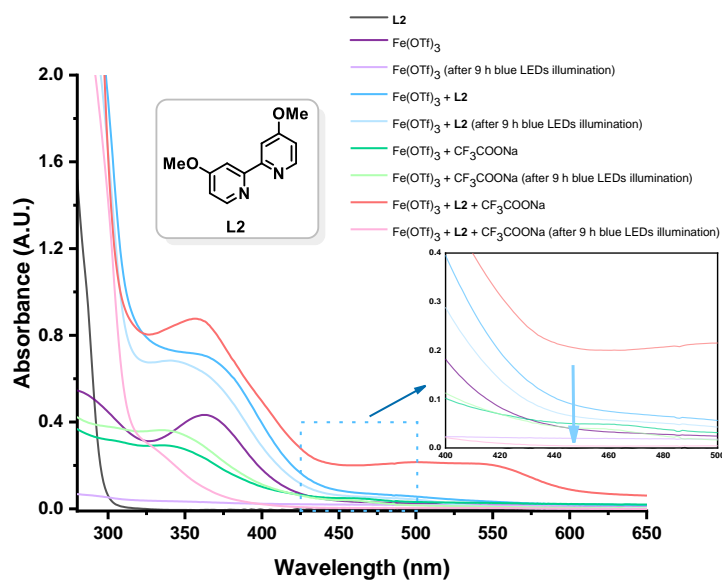

Figure S26. UV-Vis spectra of light-harvesting species.

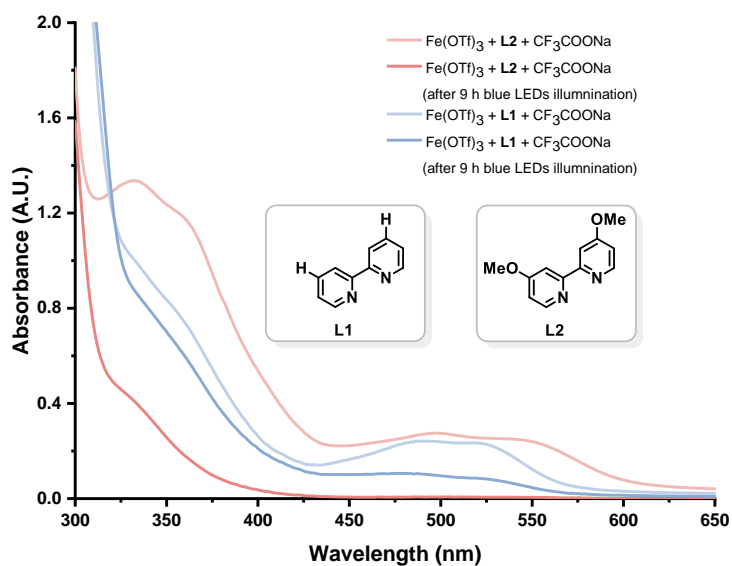

Figure S27. UV-Vis spectra for Fe(III)/ligand (L1/L2)-based species.



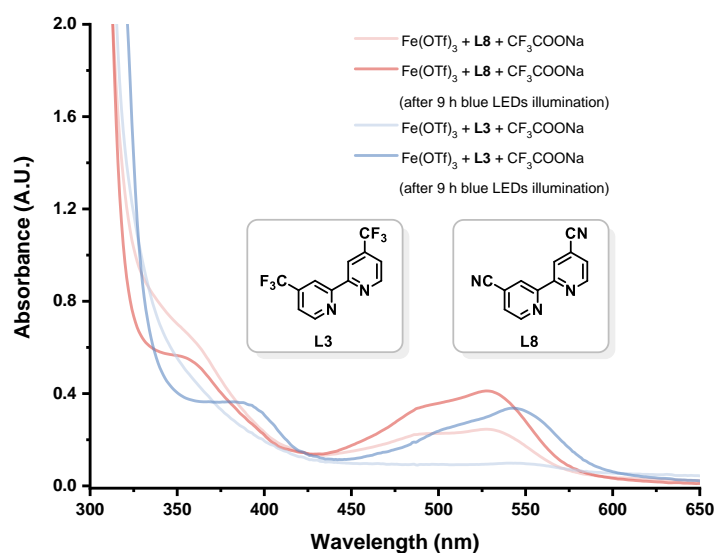

**Figure S28.** UV-Vis spectra for Fe(III)/ligand (L3/L8)-based species.

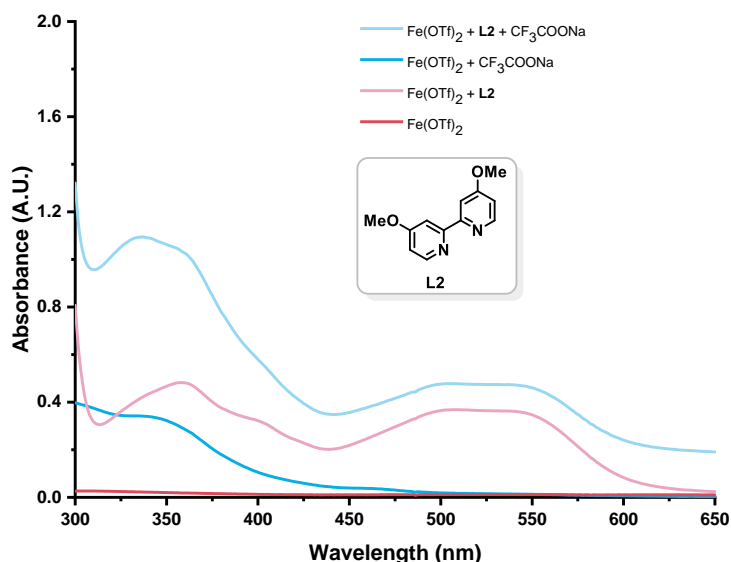

**Figure S29.** UV-Vis spectra of ligand-Fe(II) species. The solution was stirred under darkness and diluted before measurement.

**General procedure for radical trapping experiment:** Following general procedure of *Standard condition A*, a 25-mL Schlenk flask equipped with magneton was charged with Fe(OTf)<sub>3</sub> (0.02 mmol), **L2** (0.03 mmol), CF<sub>3</sub>COONa (0.6 mmol), 2,2,6,6-tetramethyl-1-piperidinyloxy (TEMPO) (0.6 mmol) or butylated hydroxytoluene (BHT) (0.6 mmol). The flask was evacuated and refilled with N<sub>2</sub> for three times. The vessel was then charged with extra dry CH<sub>3</sub>CN (1.0 mL), CCl<sub>3</sub>CN (1.0 mL) and alkene **1** (0.2 mmol). The reaction mixture was stirred under nitrogen atmosphere and irradiated by blue LEDs for 24 h. After completion of the reaction, the system was diluted with EtOAc. Yields and conversion rates were determined by GC analysis of the crude reaction mixture, using biphenyl as an internal standard.

Then crude reaction mixture was used for **ESI-HRMS** detection. **BHT-CF<sub>3</sub>**: **ESI-HRMS** exact mass calculated for [C<sub>16</sub>H<sub>23</sub>F<sub>3</sub>ONa<sup>+</sup>]: 311.1593, found 311.1608 (Figures S30 and S31).

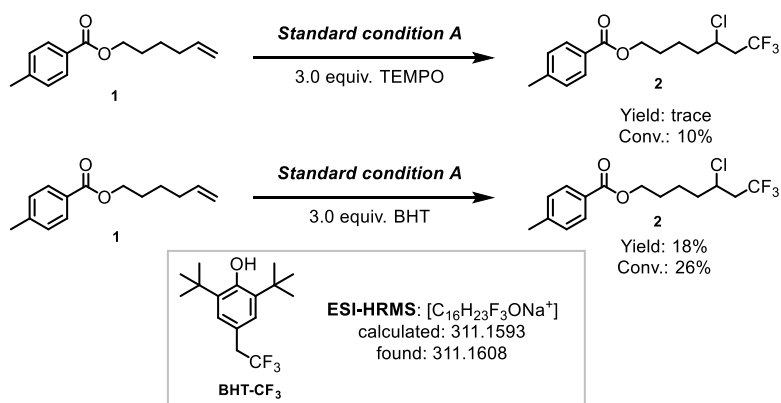

**Figure S30. Radical trapping experiment.**

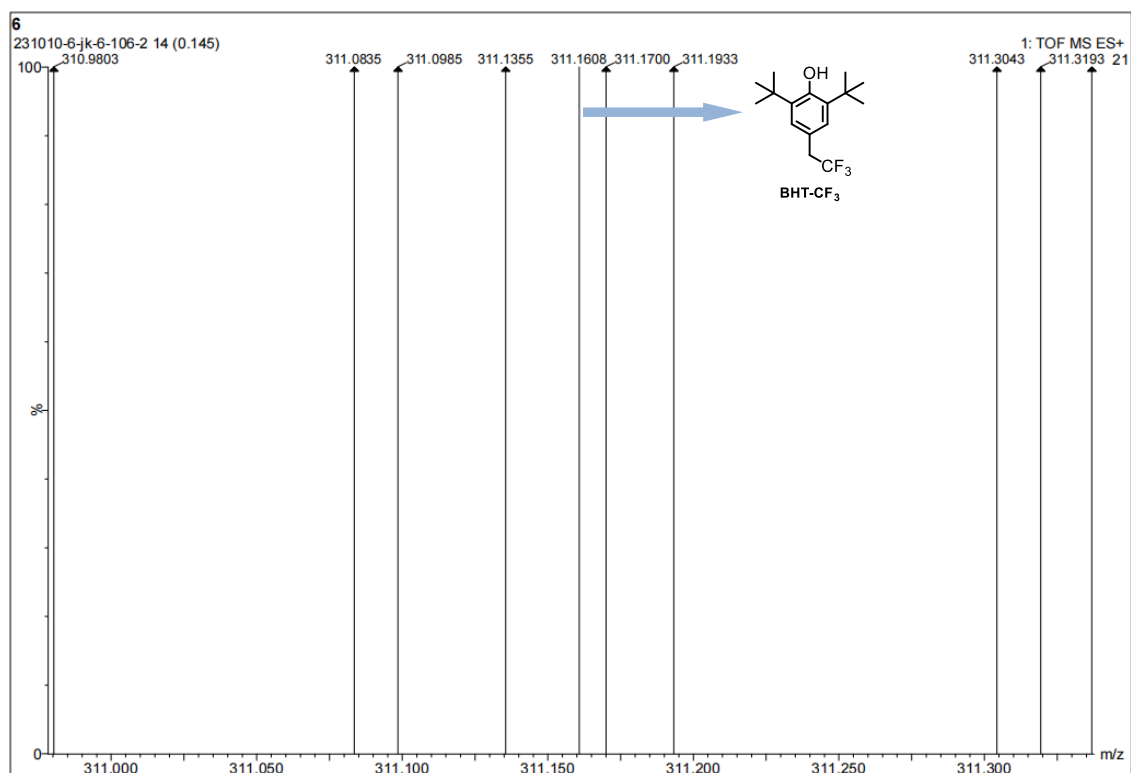

**Figure S31. ESI-HRMS** detection of **BHT-CF<sub>3</sub>**.

**General procedure for radical clock experiment:** Following general procedure of *Standard condition A*, a 25-mL Schlenk flask equipped with magneton was charged with Fe(OTf)<sub>3</sub> (0.02 mmol), **L2** (0.03 mmol), CF<sub>3</sub>COONa (0.6 mmol). The flask was evacuated and refilled with N<sub>2</sub> for three times. The vessel was then charged with extra dry CH<sub>3</sub>CN (1.0 mL), CCl<sub>3</sub>CN (1.0 mL) and N,N-diallyl-4-methylbenzenesulfonamide **41** (0.2 mmol). The reaction mixture was stirred under nitrogen atmosphere and irradiated by blue LEDs for 24 h. After completion of the reaction, the system was diluted with EtOAc. After concentrated under vacuum, the resulting residue was purified by silica gel flash column chromatography to give the product **42** in a yield of 63% (**Figure S32**).

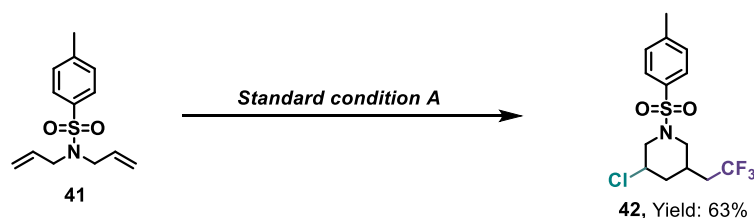

**Figure S32. Radical clock experiment.**

**General procedure for light on/off experiment:** Following general procedure of *Standard condition A*, a 25-mL Schlenk flask equipped with magneton was charged with  $\text{Fe}(\text{OTf})_3$  (0.02 mmol), **L2** (0.03 mmol) and  $\text{CF}_3\text{COONa}$  (0.6 mmol). The flask was evacuated and refilled with  $\text{N}_2$  for three times. The vessel was then charged with extra dry  $\text{CH}_3\text{CN}$  (1.0 mL),  $\text{CCl}_3\text{CN}$  (1.0 mL) and alkene **1** (0.2 mmol). The reaction mixture was stirred under nitrogen atmosphere. Keep blue LEDs light on in light-on time span and turn off in light-off time span. After completion of the reaction, the system was diluted with EtOAc. Yields were determined by GC analysis of the crude reaction mixture, using biphenyl as an internal standard. Observed product **2** formation occurred only during periods of light irradiation, which ruled out a radical chain mechanism.

**General procedure for kinetic studies of  $\text{Fe}(\text{OTf})_3/\text{L2}$ :** Following general procedure of *Standard condition A*, a 25-mL Schlenk flask equipped with magneton was charged with  $\text{Fe}(\text{OTf})_3$  (n mol%), **L2** (1.5n mol%), and  $\text{CF}_3\text{COONa}$  (82.2 mg, 0.6 mmol). The flask was evacuated and refilled with  $\text{N}_2$  for three times. The vessel was then charged with extra dry  $\text{CH}_3\text{CN}$  (1.0 mL),  $\text{CCl}_3\text{CN}$  (1.0 mL) and alkene **1** (0.2 mmol). The reaction mixture was stirred under nitrogen atmosphere and irradiated by blue LEDs for 8 h. After completion of the reaction, the system was diluted with EtOAc. Yields were determined by GC analysis of the crude reaction mixture, using biphenyl as an internal standard (Table S7).

| n | $[\text{Fe}^{\text{III}}]$ ( $\text{mol}\cdot\text{L}^{-1}$ ) | Yield (%) | Initial rate ( $\text{mol}\cdot\text{L}^{-1}\cdot\text{h}^{-1}$ ) |
|---|---------------------------------------------------------------|-----------|-------------------------------------------------------------------|
| 0 | 0                                                             | 0         | 0                                                                 |
| 1 | 0.001                                                         | 7         | 0.000875                                                          |
| 3 | 0.003                                                         | 15        | 0.001875                                                          |
| 5 | 0.005                                                         | 18        | 0.00225                                                           |
| 6 | 0.006                                                         | 20        | 0.0025                                                            |
| 7 | 0.007                                                         | 24        | 0.003                                                             |
| 9 | 0.009                                                         | 27        | 0.003375                                                          |

|    |       |    |         |
|----|-------|----|---------|
| 10 | 0.01  | 30 | 0.00375 |
| 12 | 0.012 | 34 | 0.00425 |

**Table S7.** The kinetic studies of Fe(OTf)<sub>3</sub>/L2.

**Kinetic experiments of alkene 43 in different mixture solvents:** Following general procedure of *Standard condition A*, a 25mL Schlenk flask equipped with magneton was charged with Fe(OTf)<sub>3</sub> (0.02 mmol), L2 (0.03 mmol) and CF<sub>3</sub>COONa (0.6 mmol). The flask was evacuated and refilled with N<sub>2</sub> for three times. The vessel was then charged with extra dry CH<sub>3</sub>CN or DCM (1.0 mL), CCl<sub>3</sub>CN (1.0 mL) and alkene 43 (0.2 mmol). The reaction mixture was stirred under nitrogen atmosphere and irradiated by blue LEDs. After the reaction reached the specified time (10 h, 12 h, 14 h), the system was diluted with EtOAc. Yields were determined by GC analysis of the crude reaction mixture, using biphenyl as an internal standard (Figure S33).

(i) CH<sub>3</sub>CN and CCl<sub>3</sub>CN as solvents;

(ii) DCM and CCl<sub>3</sub>CN as solvents.

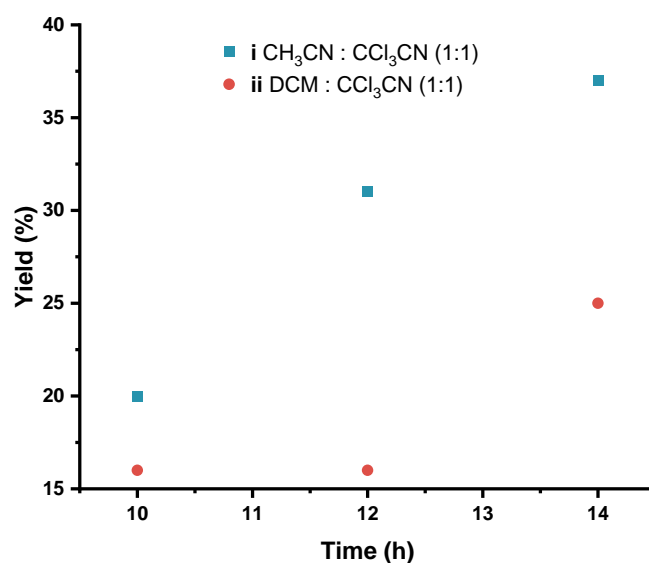

**Figure S33.** Kinetic experiments in different mixture solvents.

**ESI-HRMS detection of IntB:** Fe(OTf)<sub>3</sub> (0.1 mmol), L2 (0.1 mmol) and CF<sub>3</sub>COONa (0.2 mmol) were diluted in extra dry CH<sub>3</sub>CN (2.0 mL). The mixture was stirred in darkness for 8 h. After concentrated under vacuum, crude reaction mixture was used for **ESI-HRMS** detection. The corresponding mass of **IntB** was detected. Exact mass calculated for [C<sub>20</sub>H<sub>18</sub>F<sub>6</sub>FeN<sub>4</sub>O<sub>6</sub><sup>+</sup>]: 580.0480, found: 580.0475 (Figure S34).

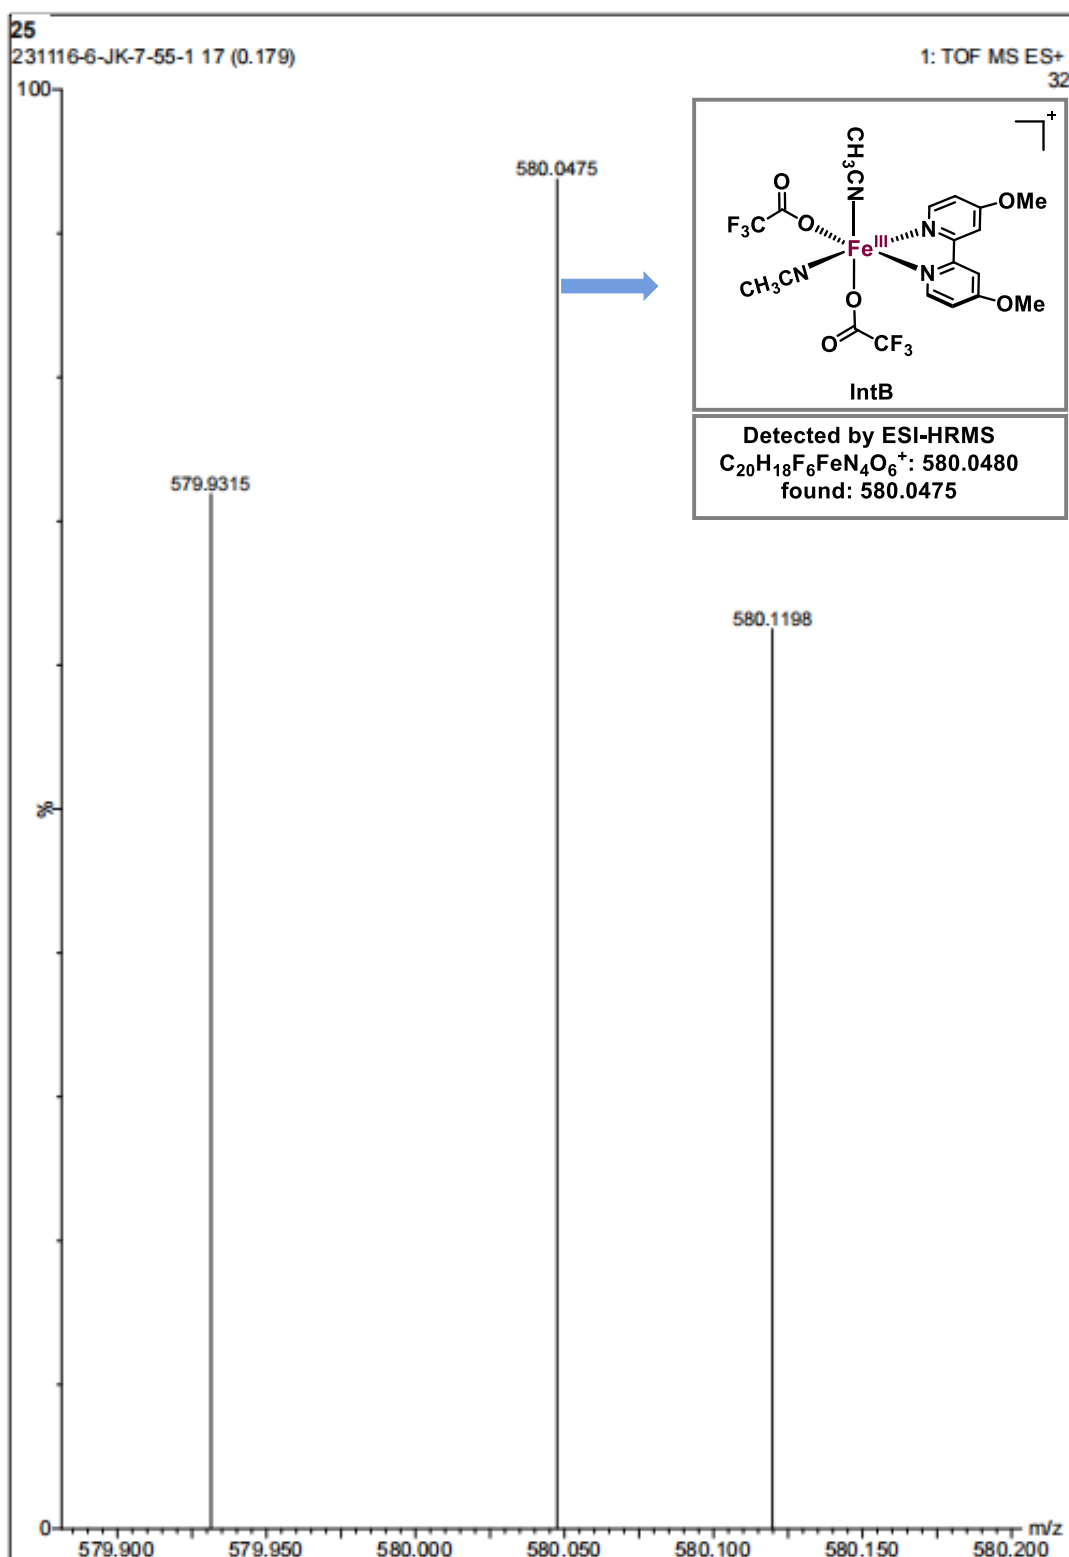

**Figure S34.** ESI-HRMS detection of **IntB**.

Regarding the roles of the dual ligands, now, we may say that OMe/CF<sub>3</sub>-substituted bipyridine is responsible for the visible light absorption of **IntB** rather than UV light (based on the UV-Vis experiments, Figure 4d and Figures S26-S29), and CH<sub>3</sub>CN/CCl<sub>3</sub>CCN as the second ligand is beneficial to stabilize the whole structure of **IntB/IntD** (by comparing the calculation data of **IntB/IntD** and **IntF**, Figures 5a and 5b, Figures S21 and S23, Tables S1-S2).

## 5. Data for products

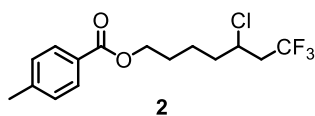

**5-Chloro-7,7,7-trifluoroheptyl 4-methylbenzoate (2):** 46.4 mg colorless liquid was isolated, yield: 84%.  $^1\text{H NMR}$  (400 MHz, Chloroform-*d*)  $\delta$  7.96 – 7.89 (m, 2H), 7.24 (d,  $J = 8.0$  Hz, 2H), 4.32 (t,  $J = 6.3$  Hz, 2H), 4.19 – 4.08 (m, 1H), 2.71 – 2.45 (m, 2H), 2.41 (s, 3H), 1.97 – 1.87 (m, 1H), 1.86 – 1.72 (m, 4H), 1.64 – 1.56 (m, 1H).  $^{13}\text{C NMR}$  (101 MHz, Chloroform-*d*)  $\delta$  166.80, 143.75, 129.69, 129.22, 127.66, 125.35 (q,  $J = 277.6$  Hz), 64.41, 54.04 (q,  $J = 3.3$  Hz), 42.58 (q,  $J = 28.4$  Hz), 37.73, 28.18, 22.78, 21.78.  $^{19}\text{F NMR}$  (376 MHz, Chloroform-*d*)  $\delta$  -63.79 (s, 3F). **ESI-HRMS** exact mass calculated for  $[\text{C}_{15}\text{H}_{19}\text{ClF}_3\text{O}_2]^+$ : 323.1020, found 323.1033.

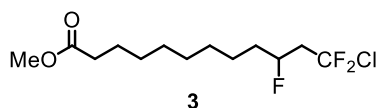

**Methyl 12-chloro-10,12,12-trifluorododecanoate (3):** 45.3 mg white solid was isolated, yield: 75%.  $^1\text{H NMR}$  (400 MHz, Chloroform-*d*)  $\delta$  4.95 – 4.72 (m, 1H), 3.66 (s, 3H), 2.82 – 2.38 (m, 2H), 2.30 (t,  $J = 7.5$  Hz, 2H), 1.80 – 1.66 (m, 1H), 1.65 – 1.57 (m, 3H), 1.47 – 1.23 (m, 10H).  $^{13}\text{C NMR}$  (101 MHz, Chloroform-*d*)  $\delta$  174.42, 127.96 (td,  $J = 2.6$ , 292.5, Hz), 88.55 (dt,  $J = 172.6$ , 3.0 Hz), 51.60, 47.14 (q,  $J = 24.2$  Hz), 35.16 (d,  $J = 20.7$  Hz), 34.21, 29.33, 29.24, 29.23, 29.20, 25.04, 24.68 (d,  $J = 4.3$  Hz).  $^{19}\text{F NMR}$  (376 MHz, Chloroform-*d*)  $\delta$  -48.57 – -50.37 (m, 2F), -181.11 – -181.18 (m, 1F). **ESI-HRMS** exact mass calculated for  $[\text{C}_{13}\text{H}_{22}\text{ClF}_3\text{O}_2\text{Na}^+]$ : 325.1153, found 325.1156.

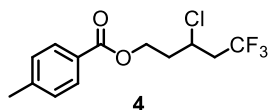

**3-Chloro-5,5,5-trifluoropentyl 4-methylbenzoate (4):** 49.4 mg colorless liquid was isolated, yield: 84%.  $^1\text{H NMR}$  (400 MHz, Chloroform-*d*)  $\delta$  8.02 – 7.91 (m, 2H), 6.96 – 6.88 (m, 2H), 4.58 – 4.39 (m, 2H), 4.39 – 4.28 (m, 1H), 3.85 (s, 3H), 2.81 – 2.52 (m, 2H), 2.42 – 2.29 (m, 1H), 2.29 – 2.06 (m, 1H).  $^{13}\text{C NMR}$  (101 MHz, Chloroform-*d*)  $\delta$  166.44, 144.04, 129.69, 129.29, 127.18, 125.21 (q,  $J = 277.6$  Hz), 61.05, 50.83 (q,  $J = 3.2$  Hz), 42.57 (q,  $J = 28.7$  Hz), 37.10, 21.74.  $^{19}\text{F NMR}$  (376 MHz, Chloroform-*d*)  $\delta$  -63.98 (s, 3F). **ESI-HRMS** exact mass calculated for  $[\text{C}_{13}\text{H}_{14}\text{ClF}_3\text{O}_2\text{Na}^+]$ : 317.0527, found 317.0536.

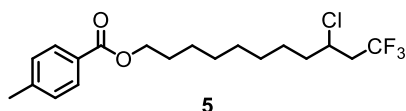

**9-Chloro-11,11,11-trifluoroundecyl 4-methylbenzoate (5):** 62.1 mg colorless liquid was isolated, yield: 82%.  $^1\text{H NMR}$  (400 MHz, Chloroform-*d*)  $\delta$  7.93 (d,  $J = 8.2$  Hz, 2H), 7.23 (d,  $J = 8.1$  Hz, 2H), 4.30 (t,  $J = 6.6$  Hz, 2H), 4.15 – 4.04 (m, 1H), 2.69 – 2.51 (m, 2H), 2.40 (s, 3H), 1.88 – 1.63 (m, 4H), 1.53 – 1.22 (m, 10H).  $^{13}\text{C NMR}$  (101 MHz, Chloroform-*d*)  $\delta$  166.84, 143.54, 129.66, 129.13, 127.89, 125.42 (q,  $J = 277.6$  Hz), 64.96, 54.27 (d,  $J = 3.1$  Hz), 42.53 (q,  $J = 28.4$  Hz), 38.15, 29.37, 29.23, 28.87, 28.82, 26.09, 25.97, 21.72.  $^{19}\text{F NMR}$  (376 MHz, Chloroform-*d*)  $\delta$  -63.82 (s, 3F). **ESI-HRMS** exact mass calculated for  $[\text{C}_{19}\text{H}_{26}\text{ClF}_3\text{O}_2\text{Na}^+]$ : 401.1466, found 401.1465.

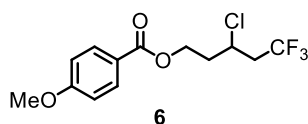

**3-Chloro-5,5,5-trifluoropentyl 4-methoxybenzoate (6):** 49.0 mg colorless liquid was isolated, yield: 79%.  $^1\text{H NMR}$  (400 MHz, Chloroform-*d*)  $\delta$  8.00 – 7.95 (m, 2H), 6.95 – 6.90 (m, 2H), 4.57 – 4.42 (m, 2H), 4.38 – 4.29 (m, 1H), 3.85 (s, 3H), 2.79 – 2.56 (m, 2H), 2.41 – 2.31 (m, 1H), 2.18 – 2.08 (m, 1H).  $^{13}\text{C NMR}$  (101 MHz, Chloroform-*d*)  $\delta$  166.06, 163.64, 131.67, 125.21 (q,  $J = 277.6$  Hz), 122.27, 113.80, 60.90, 55.48, 50.84 (q,  $J = 3.3$  Hz), 42.52 (q,  $J = 28.6$  Hz), 37.12.  $^{19}\text{F NMR}$  (376 MHz, Chloroform-*d*)  $\delta$  -63.65 (s, 3F). **ESI-HRMS** exact mass calculated for  $[\text{C}_{13}\text{H}_{14}\text{ClF}_3\text{O}_3\text{Na}^+]$ : 333.0476, found 333.0475.

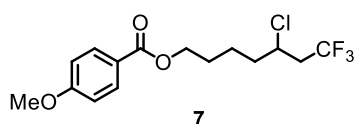

**5-Chloro-7,7,7-trifluoroheptyl 4-methoxybenzoate (7):** 46.6 mg colorless liquid was isolated, yield: 69%.  $^1\text{H NMR}$  (400 MHz, Chloroform-*d*)  $\delta$  8.05 – 7.94 (m, 2H), 6.95 – 6.87 (m, 2H), 4.30 (t,  $J = 6.2$  Hz, 2H), 4.18 – 4.01 (m, 1H), 3.84 (s, 3H), 2.72 – 2.44 (m, 2H), 1.96 – 1.85 (m, 1H), 1.84 – 1.67 (m, 4H), 1.65 – 1.53 (m, 1H).  $^{13}\text{C NMR}$  (101 MHz, Chloroform-*d*)  $\delta$  166.37, 163.44, 131.60, 125.33 (q,  $J = 277.6$  Hz), 122.75, 113.68, 64.22, 55.44, 54.00 (q,  $J = 3.1$  Hz), 42.45 (q,  $J = 28.4$  Hz), 37.66, 28.13, 22.70.  $^{19}\text{F NMR}$  (376 MHz, Chloroform-*d*)  $\delta$  -63.66 (s, 3F). **ESI-HRMS** exact mass calculated for  $[\text{C}_{15}\text{H}_{18}\text{ClF}_3\text{O}_3\text{Na}^+]$ : 361.0789, found 361.0788.

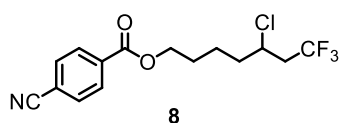

**5-Chloro-7,7,7-trifluoroheptyl 4-cyanobenzoate (8):** 52.6 mg colorless liquid was isolated, yield: 79%.  $^1\text{H NMR}$  (400 MHz, Chloroform-*d*)  $\delta$  8.12 – 8.07 (d, 2H), 7.75 – 7.67 (d, 2H), 4.34 (t,  $J = 6.3$  Hz, 2H), 4.16 – 4.07 (m, 1H), 2.69 – 2.44 (m, 2H), 1.94 – 1.85 (m, 1H), 1.84 – 1.66 (m, 4H), 1.64 – 1.51 (m, 1H).  $^{13}\text{C NMR}$  (101 MHz, Chloroform-*d*)  $\delta$  164.82, 134.02, 132.17, 129.98, 125.22 (q,  $J = 277.6$  Hz), 117.90, 116.29, 65.23, 53.88 (q,  $J = 3.0$  Hz), 42.27 (q,  $J = 28.4$  Hz), 37.42, 27.83, 22.48.  $^{19}\text{F NMR}$  (376 MHz, Chloroform-*d*)  $\delta$  -63.75 (s, 3F). **ESI-HRMS** exact mass calculated for  $[\text{C}_{15}\text{H}_{16}\text{ClF}_3\text{NO}_2^+]$ : 334.0816, found 334.0828.

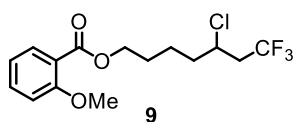

**5-Chloro-7,7,7-trifluoroheptyl 2-methoxybenzoate (9):** 41.2 mg colorless liquid was isolated, yield: 61%.  $^1\text{H NMR}$  (400 MHz, Chloroform-*d*)  $\delta$  7.77 (dd,  $J = 7.9, 1.8$  Hz, 1H), 7.50 – 7.41 (m, 1H), 7.01 – 6.92 (m, 2H), 4.31 (t,  $J = 6.2$  Hz, 2H), 4.16 – 4.07 (m, 1H), 3.88 (s, 3H), 2.71 – 2.44 (m, 2H), 1.95 – 1.85 (m, 1H), 1.84 – 1.70 (m, 4H), 1.65 – 1.56 (m, 1H).  $^{13}\text{C NMR}$  (101 MHz, Chloroform-*d*)  $\delta$  166.34, 159.18, 133.53, 131.55, 125.32 (q,  $J = 277.6$  Hz), 120.30, 120.17, 112.09, 64.34, 55.97, 54.03 (q,  $J = 3.1$  Hz), 42.45 (q,  $J = 28.4$  Hz), 37.66, 28.07, 22.69.  $^{19}\text{F NMR}$  (376 MHz, Chloroform-*d*)  $\delta$  -63.79 (s, 3F). **ESI-HRMS** exact mass calculated for  $[\text{C}_{15}\text{H}_{18}\text{ClF}_3\text{O}_3\text{Na}^+]$ : 361.1789, found 361.0799.

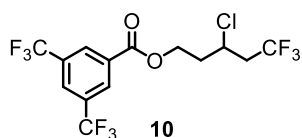

**3-Chloro-5,5,5-trifluoropentyl 3,5-bis(trifluoromethyl)benzoate (10):** 60.0 mg colorless liquid was isolated, yield: 72%.  $^1\text{H NMR}$  (400 MHz, Chloroform-*d*)  $\delta$  8.46 (s, 2H), 8.07 (s, 1H), 4.70 – 4.55 (m, 2H), 4.36 – 4.27 (m, 1H), 2.83 – 2.56 (m, 2H), 2.51 – 2.36 (m, 1H), 2.27 – 2.14 (m, 1H).  $^{13}\text{C NMR}$  (101 MHz, Chloroform-*d*)  $\delta$  163.83, 132.49 (q,  $J = 34.1$  Hz), 132.17, 129.85 (d,  $J = 2.9$  Hz), 126.86 – 126.60 (m), 125.16 (q,  $J = 277.5$  Hz), 122.99 (q,  $J = 272.8$  Hz), 62.65, 50.63 (q,  $J = 3.2$  Hz), 42.63 (q,  $J = 28.8$  Hz), 36.83.  $^{19}\text{F NMR}$  (376 MHz, Chloroform-*d*)  $\delta$  -63.32 (s, 6F), -63.97 (s, 3F). **ESI-HRMS** exact mass calculated for  $[\text{C}_{14}\text{H}_{10}\text{ClF}_9\text{O}_2\text{Na}^+]$ : 439.0118, found 439.0119.

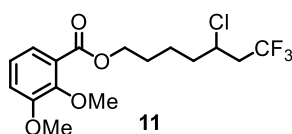

**5-Chloro-7,7,7-trifluoroheptyl 3,5-dimethoxybenzoate (11):** 61.8 mg colorless liquid was isolated, yield: 84%.  $^1\text{H NMR}$  (400 MHz, Chloroform-*d*)  $\delta$  7.66 (dd,  $J = 8.4, 1.9$  Hz, 1H), 7.52 (d,  $J = 1.9$  Hz, 1H), 6.87 (d,  $J = 8.4$  Hz, 1H), 4.30 (t,  $J = 6.2$  Hz, 2H), 4.17 – 4.06 (m, 1H), 3.91 (s, 3H), 3.91 (s, 3H), 2.71 – 2.44 (m, 2H), 1.97 – 1.85 (m, 1H), 1.84 – 1.66 (m, 4H), 1.64 – 1.52 (m, 1H).  $^{13}\text{C NMR}$  (101 MHz, Chloroform-*d*)  $\delta$  166.41, 153.07, 148.70, 125.29 (q,  $J = 277.6$  Hz), 123.57, 122.84, 112.01, 110.32, 64.35, 56.05 (d,  $J = 2.9$  Hz), 54.00 (q,  $J = 3.3$  Hz), 54.00 (q,  $J = 3.3$  Hz), 42.47 (q,  $J = 28.4$  Hz), 37.62, 28.14, 22.66.  $^{19}\text{F NMR}$  (376 MHz, Chloroform-*d*)  $\delta$  -63.79 (s, 3F). **ESI-HRMS** exact mass calculated for  $[\text{C}_{16}\text{H}_{20}\text{ClF}_3\text{O}_4\text{Na}^+]$ : 391.0894, found 391.0891.

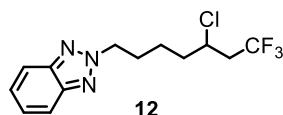

**2-(5-Chloro-7,7,7-trifluoroheptyl)-2H-benzo[d][1,2,3]triazole (12):** 45.1 mg colorless liquid was isolated, yield: 74%.  $^1\text{H NMR}$  (400 MHz, Chloroform-*d*)  $\delta$  7.85 (dd,  $J = 6.5, 3.1$  Hz, 2H), 7.36 (dd,  $J = 6.6, 3.1$  Hz, 2H), 4.73 (t,  $J = 7.0$  Hz, 2H), 4.11 – 4.00 (m, 1H), 2.67 – 2.38 (m, 2H), 2.25 – 2.04 (m, 2H), 1.89 – 1.70 (m, 2H), 1.69 – 1.57 (m, 1H), 1.55 – 1.42 (m, 1H).  $^{13}\text{C NMR}$  (101 MHz, Chloroform-*d*)  $\delta$  144.39, 126.37, 125.24 (q,  $J = 277.6$  Hz), 118.02, 56.14, 53.72 (q,  $J = 3.1$  Hz), 42.40 (q,  $J = 28.5$  Hz), 37.35, 29.24, 23.12.  $^{19}\text{F NMR}$  (376 MHz, Chloroform-*d*)  $\delta$  -63.79 (s, 3F). **ESI-HRMS** exact mass calculated for  $[\text{C}_{13}\text{H}_{16}\text{ClF}_3\text{N}_3^+]$ : 306.0979, found 306.0985.

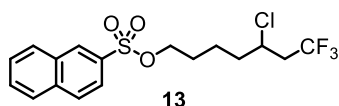

**5-Chloro-7,7,7-trifluoroheptyl naphthalene-2-sulfonate (13):** 53.6 mg colorless liquid was isolated, yield: 68%.  $^1\text{H NMR}$  (400 MHz, Chloroform-*d*)  $\delta$  8.49 (s, 1H), 7.99 (t,  $J = 7.8$  Hz, 2H), 7.93 (d,  $J = 8.0$  Hz, 1H), 7.86 (d,  $J = 8.6$  Hz, 1H), 7.73 – 7.60 (m, 2H), 4.09 (t,  $J = 6.2$  Hz, 2H), 4.01 (m, 1H), 2.66 – 2.33 (m, 2H), 1.87 – 1.51 (m, 5H), 1.53 – 1.37 (m, 1H).  $^{13}\text{C NMR}$  (101 MHz, Chloroform-*d*)  $\delta$  135.33, 132.82, 131.99, 129.81, 129.73, 129.49, 129.36, 128.07, 127.95, 125.23 (d,  $J = 277.6$  Hz), 122.51, 70.39, 53.75 (q,  $J = 3.1$  Hz), 42.28 (q,  $J = 28.4$  Hz), 37.25, 28.18, 22.08.  $^{19}\text{F NMR}$



**NMR** (376 MHz, Chloroform-*d*)  $\delta$  -63.73 (s, 3F). **ESI-HRMS** exact mass calculated for  $[\text{C}_{17}\text{H}_{18}\text{ClF}_3\text{O}_3\text{SNa}^+]$ : 417.0509, found 417.0512.

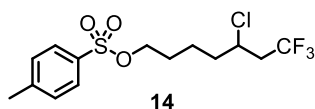

**5-Chloro-7,7,7-trifluoroheptyl 4-methylbenzenesulfonate (14)**: 48.0 mg colorless liquid was isolated, yield: 67%. **<sup>1</sup>H NMR** (400 MHz, Chloroform-*d*)  $\delta$  7.76 (d, *J* = 8.3 Hz, 2H), 7.33 (d, *J* = 8.0 Hz, 2H), 4.09 – 3.98 (m, 3H), 2.63 – 2.44 (m, 2H), 2.42 (s, 3H), 1.80 – 1.70 (m, 1H), 1.70 – 1.50 (m, 4H), 1.49 – 1.38 (m, 1H). **<sup>13</sup>C NMR** (101 MHz, Chloroform-*d*)  $\delta$  144.97, 132.99, 129.95, 127.87, 125.25 (q, *J* = 277.6 Hz), 70.09, 53.78 (q, *J* = 3.1 Hz), 42.27 (q, *J* = 28.4 Hz), 37.25, 28.11, 22.05, 21.60. **<sup>19</sup>F NMR** (376 MHz, Chloroform-*d*)  $\delta$  -63.79 (s, 3F). **ESI-HRMS** exact mass calculated for  $[\text{C}_{14}\text{H}_{18}\text{ClF}_3\text{O}_3\text{SNa}^+]$ : 381.0509, found 381.0508.

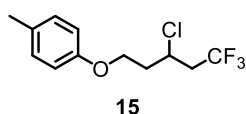

**1-((3-Chloro-5,5,5-trifluoropentyl)oxy)-4-methylbenzene (15)**: 41.5 mg colorless liquid was isolated, yield: 78%. **<sup>1</sup>H NMR** (400 MHz, Chloroform-*d*)  $\delta$  7.10 (d, *J* = 8.3 Hz, 2H), 6.82 (d, *J* = 8.5 Hz, 2H), 4.50 – 4.41 (m, 1H), 4.21 – 4.10 (m, 2H), 2.75 – 2.62 (m, 2H), 2.40 – 2.33 (m, 1H), 2.30 (s, 3H), 2.18 – 2.08 (m, 1H). **<sup>13</sup>C NMR** (101 MHz, Chloroform-*d*)  $\delta$  156.50, 130.54, 130.11, 125.35 (q, *J* = 277.6 Hz), 114.56, 64.11, 51.14 (q, *J* = 3.3 Hz), 42.69 (q, *J* = 28.6 Hz), 37.85, 20.60. **<sup>19</sup>F NMR** (376 MHz, Chloroform-*d*)  $\delta$  -63.61 (s, 3F). **ESI-HRMS** exact mass calculated for  $[\text{C}_{12}\text{H}_{15}\text{ClF}_3\text{O}^+]$ : 267.1758, found 267.0756.

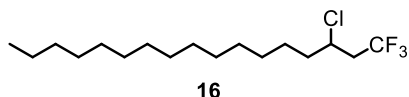

**3-Chloro-1,1,1-trifluoroheptadecane (16)**: 44.0 mg colorless liquid was isolated, yield: 67%. **<sup>1</sup>H NMR** (400 MHz, Chloroform-*d*)  $\delta$  4.15 – 4.07 (m, 1H), 2.69 – 2.45 (m, 2H), 1.88 – 1.68 (m, 2H), 1.60 – 1.50 (m, 1H), 1.48 – 1.39 (m, 1H), 1.31 – 1.24 (m, 22H), 0.89 (t, *J* = 6.8 Hz, 3H). **<sup>13</sup>C NMR** (101 MHz, Chloroform-*d*)  $\delta$  125.48 (q, *J* = 277.5 Hz), 54.34 (q, *J* = 3.1 Hz), 42.62 (q, *J* = 28.3 Hz), 38.26, 32.11, 29.87, 29.85, 29.83, 29.82, 29.78, 29.68, 29.57, 29.54, 29.04, 26.08, 22.87, 14.26. **<sup>19</sup>F NMR** (376 MHz, Chloroform-*d*)  $\delta$  -63.89 (s, 3F). **ESI-HRMS** exact mass calculated for  $[\text{C}_{17}\text{H}_{32}\text{ClF}_3\text{Na}^+]$ : 351.2037, found 351.2039.

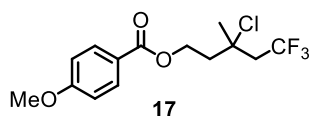

**3-Chloro-5,5,5-trifluoro-3-methylpentyl 4-methoxybenzoate (17)**: 44.1 mg colorless liquid was isolated, yield: 66%. **<sup>1</sup>H NMR** (400 MHz, Chloroform-*d*)  $\delta$  8.00 – 7.94 (m, 2H), 6.95 – 6.87 (m, 2H), 4.62 – 4.49 (m, 2H), 3.85 (s, 3H), 2.87 – 2.69 (m, 2H), 2.44 – 2.26 (m, 2H), 1.78 (s, 3H). **<sup>13</sup>C NMR** (101 MHz, Chloroform-*d*)  $\delta$  166.15, 163.61, 131.68, 125.02 (q, *J* = 278.7 Hz), 122.39, 113.79, 65.55 (d, *J* = 2.1 Hz), 61.12, 55.50, 47.13 (q, *J* = 27.8 Hz), 42.30, 30.49. **<sup>19</sup>F NMR** (376 MHz, Chloroform-*d*)  $\delta$  -60.53 (s, 3F). **ESI-HRMS** exact mass calculated for  $[\text{C}_{14}\text{H}_{16}\text{ClF}_3\text{O}_3\text{Na}^+]$ : 347.0632, found 347.0631.

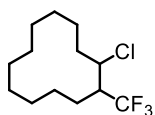

**18**, d.r. = 4:1

**1-Chloro-2-(trifluoromethyl)cyclododecane (18)**: 34.0 mg colorless liquid was isolated, yield: 63%, d.r. = 4:1. Characterization data for a mixture of rotamers:  $^1\text{H NMR}$  (400 MHz, Chloroform-*d*)  $\delta$  4.28 – 4.12 (m, 1H), 2.64 – 2.51 (m, 1H), 2.20 – 1.95 (m, 1H), 1.84 – 1.59 (m, 4H), 1.55 – 1.22 (m, 15H).  $^{13}\text{C NMR}$  (101 MHz, Chloroform-*d*)  $\delta$  127.71 (q,  $J = 281.6$  Hz), 55.23, 44.10 (q,  $J = 24.6$  Hz), 34.96, 24.80, 23.52, 22.91, 22.87, 22.82, 22.65, 22.48, 21.72, 21.23.  $^{19}\text{F NMR}$  (376 MHz, Chloroform-*d*)  $\delta$  -64.30 (s, 3F). **ESI-HRMS** exact mass calculated for  $[\text{C}_{13}\text{H}_{22}\text{ClF}_3\text{Na}^+]$ : 293.1254, found 293.1270.

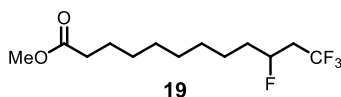

**Methyl 10,12,12,12-tetrafluorododecanoate (19)**: 30.9 mg white solid was isolated, yield: 54%.  $^1\text{H NMR}$  (400 MHz, Chloroform-*d*)  $\delta$  4.89 – 4.65 (m, 1H), 3.66 (s, 3H), 2.58 – 2.39 (m, 1H), 2.38 – 2.20 (m, 3H), 1.80 – 1.67 (m, 1H), 1.65 – 1.55 (m, 3H), 1.51 – 1.28 (m, 10H).  $^{13}\text{C NMR}$  (101 MHz, Chloroform-*d*)  $\delta$  174.41, 125.64 (dq,  $J = 3.3, 276.8$  Hz), 87.74 (dq,  $J = 172.0, 3.2$  Hz), 51.58, 39.52 (qd,  $J = 28.4, 23.0$  Hz), 35.12 (d,  $J = 20.7$  Hz), 34.19, 29.32, 29.23, 29.22, 29.19, 25.03, 24.68 (d,  $J = 4.3$  Hz).  $^{19}\text{F NMR}$  (376 MHz, Chloroform-*d*)  $\delta$  -64.18 (d,  $J = 7.6$  Hz, 3F), -181.82 (q,  $J = 7.6$  Hz, 1F). **ESI-HRMS** exact mass calculated for  $[\text{C}_{13}\text{H}_{22}\text{F}_4\text{O}_2\text{Na}^+]$ : 309.1448, found 309.1456.

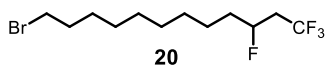

**12-Bromo-1,1,1,3-tetrafluorododecane (20)**: 30.1 mg colorless liquid was isolated, yield: 47%.  $^1\text{H NMR}$  (400 MHz, DMSO-*d*<sub>6</sub>)  $\delta$  4.98 – 4.58 (m, 1H), 3.52 (t,  $J = 6.7$  Hz, 2H), 2.83 – 2.56 (m, 2H), 1.87 – 1.73 (m, 2H), 1.70 – 1.50 (m, 2H), 1.46 – 1.23 (m, 12H).  $^{13}\text{C NMR}$  (101 MHz, Chloroform-*d*)  $\delta$  125.64 (qd,  $J = 276.8, 3.2$  Hz), 87.73 (dq,  $J = 172.0, 3.2$  Hz), 39.52 (qd,  $J = 28.4, 23.0$  Hz), 35.13 (d,  $J = 20.8$  Hz), 34.11, 32.93, 29.43, 29.41, 29.27, 28.83, 28.26, 24.70 (d,  $J = 4.2$  Hz).  $^{19}\text{F NMR}$  (376 MHz, DMSO-*d*<sub>6</sub>)  $\delta$  -62.45 (d,  $J = 7.8$  Hz, 3F), -181.90 (q,  $J = 7.9$  Hz, 1F). **ESI-HRMS** exact mass calculated for  $[\text{C}_{12}\text{H}_{22}\text{BrF}_4^+]$ : 321.0836, found 321.0823.

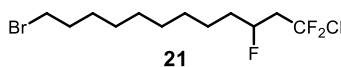

**12-Bromo-1-chloro-1,1,3-trifluorododecane (21)**: 34.9 mg colorless liquid was isolated, yield: 52%.  $^1\text{H NMR}$  (400 MHz, Chloroform-*d*)  $\delta$  4.96 – 4.74 (m, 1H), 3.41 (t,  $J = 6.8$  Hz, 2H), 2.83 – 2.39 (m, 2H), 1.91 – 1.80 (m, 2H), 1.76 – 1.52 (m, 2H), 1.51 – 1.27 (m, 12H).  $^{13}\text{C NMR}$  (101 MHz, Chloroform-*d*)  $\delta$  127.96 (td,  $J = 292.4, 2.5$  Hz), 88.55 (dt,  $J = 172.6, 2.9$  Hz), 47.14 (q,  $J = 23.8$  Hz), 35.17 (d,  $J = 20.8$  Hz), 34.15, 32.93, 29.43, 29.41, 29.28, 28.84, 28.26, 24.69 (d,  $J = 4.3$  Hz).  $^{19}\text{F NMR}$  (376 MHz, Chloroform-*d*)  $\delta$  -48.48 – -50.41 (m, 2F), -181.10 – -181.18 (m, 1F). **ESI-HRMS** exact mass calculated for  $[\text{C}_{12}\text{H}_{22}\text{BrClF}_3^+]$ : 337.0540, found 337.0544.

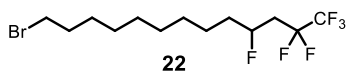

**13-Bromo-1,1,1,2,2,4-hexafluorotridecane (22):** 42.2 mg colorless liquid was isolated, yield: 57%.  $^1\text{H NMR}$  (400 MHz, DMSO- $d_6$ )  $\delta$  4.99 – 4.78 (m, 1H), 3.52 (t,  $J = 6.7$  Hz, 2H), 2.75 – 2.51 (m, 2H), 1.84 – 1.74 (m, 2H), 1.74 – 1.54 (m, 2H), 1.46 – 1.24 (m, 12H).  $^{13}\text{C NMR}$  (101 MHz, Chloroform- $d$ )  $\delta$  124.28 – 111.29 (2C, m), 86.95 (dt,  $J = 172.8$ , 3.2 Hz), 36.80-36.14 (m), 35.75, 35.54, 34.10, 32.94, 29.43, 29.42 (d,  $J = 1.7$  Hz), 29.27, 28.84, 28.27, 24.71 (d,  $J = 4.2$  Hz).  $^{19}\text{F NMR}$  (376 MHz, Chloroform- $d$ )  $\delta$  -80.23 (d,  $J = 3.5$  Hz, 3F), -109.70 – -112.17 (m, 2F), -175.64 – -175.75 (m, 1F). **ESI-HRMS** exact mass calculated for  $[\text{C}_{13}\text{H}_{21}\text{BrF}_6\text{K}^+]$ : 409.0362, found 409.0365.

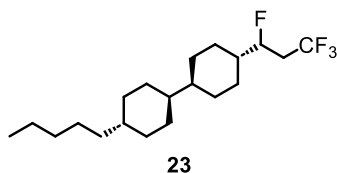

**(1s,1'S,4S,4'R)-4-Pentyl-4'-((S)-1,3,3,3-tetrafluoropropyl)-1,1'-bi(cyclohexane) (23):** 49.7 mg white solid was isolated, yield: 71%.  $^1\text{H NMR}$  (400 MHz, Chloroform- $d$ )  $\delta$  4.67 – 4.45 (m, 1H), 2.54 – 2.20 (m, 2H), 1.92 – 1.65 (m, 8H), 1.54 – 1.42 (m, 1H), 1.33 – 1.18 (m, 7H), 1.17 – 1.08 (m, 4H), 1.04 – 0.93 (m, 6H), 0.89 – 0.79 (m, 5H).  $^{13}\text{C NMR}$  (101 MHz, Chloroform- $d$ )  $\delta$  126.11 (q,  $J = 276.9$  Hz), 91.15 (dq,  $J = 174.2$ , 2.8 Hz), 43.25 (d,  $J = 27.4$  Hz), 42.22 (d,  $J = 19.3$  Hz), 38.04, 37.60, 37.23 (qd,  $J = 23.2$ , 28.3 Hz), 33.73, 32.40, 30.20, 29.36 (d,  $J = 16.7$  Hz), 28.56 (d,  $J = 4.3$  Hz), 27.24 (d,  $J = 5.7$  Hz), 26.83, 22.87, 14.26.  $^{19}\text{F NMR}$  (376 MHz, Chloroform- $d$ )  $\delta$  -64.25 (d,  $J = 7.8$  Hz, 3F), -187.38 (q,  $J = 7.9$  Hz, 1F). **ESI-HRMS** exact mass calculated for  $[\text{C}_{20}\text{H}_{35}\text{F}_4^+]$ : 351.2669, found 351.2679.

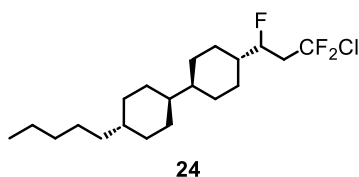

**(1S,1'S,4R,4'S)-4-((S)-3-Chloro-1,3,3-trifluoropropyl)-4'-pentyl-1,1'-bi(cyclohexane) (24):** 46.9 mg white solid was isolated, yield: 64%.  $^1\text{H NMR}$  (400 MHz, Chloroform- $d$ )  $\delta$  4.74 – 4.47 (m, 1H), 2.77 – 2.37 (m, 2H), 1.90 – 1.66 (m, 8H), 1.54 – 1.42 (m, 1H), 1.37 – 1.19 (m, 7H), 1.18 – 1.10 (m, 4H), 1.08 – 0.95 (m, 6H), 0.91 – 0.82 (m, 5H).  $^{13}\text{C NMR}$  (101 MHz, Chloroform- $d$ )  $\delta$  128.58 (t,  $J = 293.9$  Hz), 91.91 (dt,  $J = 175.3$ , 2.7 Hz), 44.90 (q,  $J = 23.7$  Hz), 43.27 (d,  $J = 26.7$  Hz), 42.32 (d,  $J = 19.4$  Hz), 38.06, 37.62, 33.74, 32.41, 30.20, 29.39 (d,  $J = 15.7$  Hz), 28.60 (d,  $J = 4.1$  Hz), 27.23 (d,  $J = 5.8$  Hz), 26.85, 22.88, 14.27.  $^{19}\text{F NMR}$  (376 MHz, Chloroform- $d$ )  $\delta$  -48.27 – -50.66 (m, 2F), -186.67 (t,  $J = 9.3$  Hz, 1F). **ESI-HRMS** exact mass calculated for  $[\text{C}_{20}\text{H}_{34}\text{ClF}_3\text{Na}^+]$ : 389.2193, found 389.2210.

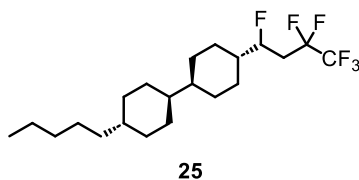

**(1S,1'S,4R,4'S)-4-((S)-1,3,3,4,4-Hexafluorobutyl)-4'-pentyl-1,1'-bi(cyclohexane) (25):** 64.8 mg white solid was isolated, yield: 81%.  $^1\text{H NMR}$  (400 MHz, Chloroform- $d$ )  $\delta$  4.81 – 4.50 (m, 1H), 2.50 – 2.12 (m, 2H), 1.94 – 1.66 (m, 8H), 1.55 – 1.42 (m, 1H), 1.35 – 1.21 (m, 7H), 1.20 – 1.09 (m, 4H), 1.08 – 0.94 (m, 6H), 0.94 – 0.82 (m, 5H).  $^{13}\text{C NMR}$  (101 MHz, Chloroform- $d$ )  $\delta$  125.29 – 111.34 (2C, m), 90.21 (dt,  $J = 175.2$ , 2.9 Hz), 43.30 (d,  $J = 26.9$  Hz), 42.62 (d,  $J = 19.4$  Hz), 38.09, 37.65, 34.14 (q,  $J = 22.2$  Hz), 33.76, 32.45, 30.23, 29.40 (d,  $J = 16.8$  Hz), 28.63 (d,  $J =$

4.0 Hz), 27.16 (d,  $J = 5.8$  Hz), 26.88, 22.90, 14.24.  $^{19}\text{F}$  NMR (376 MHz, Chloroform- $d$ )  $\delta$  -85.86 (d,  $J = 3.2$  Hz, 3F), -117.15 – 117.36 (m, 2F), -185.50 – -185.65 (m, 1F). **ESI-HRMS** exact mass calculated for  $[\text{C}_{21}\text{H}_{35}\text{F}_6]^+$ : 401.2637, found 401.2633.

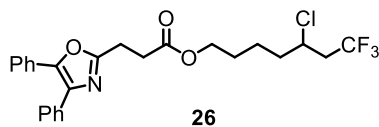

**5-Chloro-7,7,7-trifluoroheptyl 3-(4,5-diphenyloxazol-2-yl)propanoate (26)**: 56.5 mg colorless liquid was isolated, yield: 59%.  $^1\text{H}$  NMR (400 MHz, Chloroform- $d$ )  $\delta$  7.67 – 7.61 (m, 2H), 7.60 – 7.55 (m, 2H), 7.40 – 7.28 (m, 6H), 4.15 (t,  $J = 6.3$  Hz, 2H), 4.10 – 4.03 (m, 1H), 3.20 (t,  $J = 7.4$  Hz, 2H), 2.93 (t,  $J = 7.4$  Hz, 2H), 2.69 – 2.40 (m, 2H), 1.88 – 1.75 (m, 1H), 1.75 – 1.59 (m, 4H), 1.55 – 1.42 (m, 1H).  $^{13}\text{C}$  NMR (101 MHz, Chloroform- $d$ )  $\delta$  172.07, 161.80, 145.48, 135.19, 132.53, 129.04, 128.72, 128.63, 128.55, 128.15, 127.95, 126.53, 125.29 (q,  $J = 277.5$  Hz), 64.39, 53.93 (q,  $J = 3.1$  Hz), 42.44 (q,  $J = 28.4$  Hz), 37.57, 31.20, 27.97, 23.63, 22.55.  $^{19}\text{F}$  NMR (376 MHz, Chloroform- $d$ )  $\delta$  -63.69 (s, 3F). **ESI-HRMS** exact mass calculated for  $[\text{C}_{25}\text{H}_{25}\text{ClF}_3\text{NO}_3\text{Na}^+]$ : 502.1367, found 502.1378.

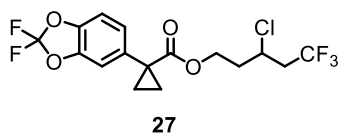

**3-Chloro-5,5,5-trifluoropentyl 2-(2,2-difluorobenzo[d][1,3]dioxol-5-yl)cyclopropane-1-carboxylate (27)**: 66.4 mg colorless liquid was isolated, yield: 83%.  $^1\text{H}$  NMR (400 MHz, Chloroform- $d$ )  $\delta$  7.08 – 7.03 (m, 2H), 6.99 – 6.96 (m, 1H), 4.29 – 4.17 (m, 2H), 4.02 – 3.94 (m, 1H), 2.61 – 2.33 (m, 2H), 2.15 – 2.05 (m, 1H), 1.97 – 1.87 (m, 1H), 1.64 – 1.61 (m, 2H), 1.22 – 1.19 (m, 2H).  $^{13}\text{C}$  NMR (101 MHz, Chloroform- $d$ )  $\delta$  173.80, 143.59, 143.02, 135.60, 131.80 (t,  $J = 255.1$  Hz), 125.78, 125.09 (q,  $J = 277.6$  Hz), 111.96, 109.05, 61.43, 50.60 (q,  $J = 3.3$  Hz), 42.35 (q,  $J = 28.6$  Hz), 36.72, 29.05, 17.28, 17.13.  $^{19}\text{F}$  NMR (376 MHz, Chloroform- $d$ )  $\delta$  -50.08 (s, 2F), -64.21 (s, 3F). **ESI-HRMS** exact mass calculated for  $[\text{C}_{16}\text{H}_{14}\text{ClF}_5\text{O}_4\text{Na}^+]$ : 432.0393, found 432.0399.

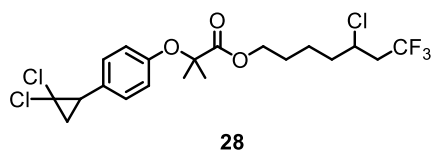

**5-Chloro-7,7,7-trifluoroheptyl 2-(3-(2,2-dichlorocyclopropyl)phenoxy)-2-methylpropanoate (28)**: 53.2 mg colorless liquid was isolated, yield: 56%.  $^1\text{H}$  NMR (400 MHz, Chloroform- $d$ )  $\delta$  7.14 – 7.06 (m, 2H), 6.83 – 6.75 (m, 2H), 4.16 (t,  $J = 6.3$  Hz, 2H), 4.06 – 3.95 (m, 1H), 2.82 (dd,  $J = 10.3, 8.7$  Hz, 1H), 2.65 – 2.36 (m, 2H), 1.93 (dd,  $J = 10.7, 7.4$  Hz, 1H), 1.80 – 1.73 (m, 2H), 1.72 – 1.62 (m, 3H), 1.60 (s, 6H), 1.55 – 1.45 (m, 1H), 1.42 – 1.32 (m, 1H).  $^{13}\text{C}$  NMR (101 MHz, Chloroform- $d$ )  $\delta$  174.33, 155.11, 129.74, 128.14, 125.31 (q,  $J = 277.5$  Hz), 118.40, 79.20, 65.05, 61.00, 53.89 (q,  $J = 2.9$  Hz), 42.41 (q,  $J = 28.4$  Hz), 37.54, 34.90, 27.81, 25.91, 25.61 – 25.40 (m), 22.47.  $^{19}\text{F}$  NMR (376 MHz, Chloroform- $d$ )  $\delta$  -63.74 (d,  $J = 2.3$  Hz, 3F). **ESI-HRMS** exact mass calculated for  $[\text{C}_{20}\text{H}_{24}\text{Cl}_3\text{F}_3\text{O}_3\text{Na}^+]$ : 497.0635, found 497.0631.

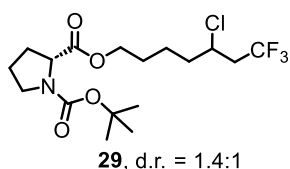

**1-(Tert-butyl) 2-(5-chloro-7,7,7-trifluoroheptyl) (2R)-pyrrolidine-1,2-dicarboxylate (29)**: 56.1 mg colorless liquid was isolated, yield: 70%, d.r. = 1.4:1.  $^1\text{H NMR}$  (400 MHz, Chloroform-*d*, a mixture of rotamers)  $\delta$  4.29-4.17 (m, 1H), 4.15 – 4.03 (m, 3H), 3.56 – 3.31 (m, 2H), 2.71 – 2.40 (m, 2H), 2.25 – 2.09 (m, 1H), 1.97 – 1.79 (m, 4H), 1.77 – 1.58 (m, 4H), 1.55 – 1.46 (m, 1H), [1.42(s, 3.78H), 1.38 (s, 5.22H), 9H].  $^{13}\text{C NMR}$  (101 MHz, Chloroform-*d*, characterization data for the major isomer)  $\delta$  173.30, 153.85, 125.26 (q,  $J = 277.7$  Hz), 79.89, 64.42 (d,  $J = 10.4$  Hz), 59.23, 53.94, 46.3, 42.50 (q,  $J = 28.8$  Hz), 37.56, 31.00, 28.43 (d,  $J = 8.1$  Hz), 28.01, 23.68, 22.57.  $^{19}\text{F NMR}$  (376 MHz, Chloroform-*d*)  $\delta$  -63.85 (s, 3F). **ESI-HRMS** exact mass calculated for  $[\text{C}_{17}\text{H}_{27}\text{ClF}_3\text{NO}_4\text{Na}^+]$ : 424.1473, found 424.1472.

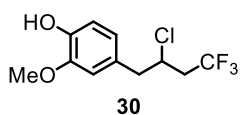

**4-(2-Chloro-4,4,4-trifluorobutyl)-2-methoxyphenol (30)**: 23.0 mg colorless liquid was isolated, yield: 43%.  $^1\text{H NMR}$  (400 MHz, Chloroform-*d*)  $\delta$  6.88 (d,  $J = 8.2$  Hz, 1H), 6.75 – 6.68 (m, 2H), 5.61 (s, 1H), 4.34 – 4.22 (m, 1H), 3.90 (s, 3H), 3.04 (d,  $J = 6.9$  Hz, 2H), 2.64 – 2.47 (m, 2H).  $^{13}\text{C NMR}$  (101 MHz, Chloroform-*d*)  $\delta$  146.68, 145.03, 128.20, 125.50 (q,  $J = 277.5$  Hz), 122.39, 114.62, 111.92, 56.07, 54.41 (q,  $J = 2.9$  Hz), 44.28, 41.29 (q,  $J = 28.6$  Hz).  $^{19}\text{F NMR}$  (376 MHz, Chloroform-*d*)  $\delta$  -63.55 (s, 3F). **ESI-HRMS** exact mass calculated for  $[\text{C}_{11}\text{H}_{12}\text{ClF}_3\text{O}_2\text{Na}^+]$ : 291.0370, found 291.0381.

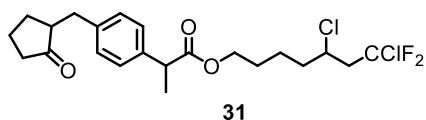

**5,7-Dichloro-7,7-difluoroheptyl 2-(4-((2-oxocyclopentyl)methyl)phenyl)propanoate (31)**: 63.6 mg colorless liquid was isolated, yield: 71%.  $^1\text{H NMR}$  (400 MHz, Chloroform-*d*)  $\delta$  7.18 (d,  $J = 8.1$  Hz, 2H), 7.09 (d,  $J = 8.2$  Hz, 2H), 4.16 – 3.94 (m, 3H), 3.66 (q,  $J = 7.1$  Hz, 1H), 3.08 (dd,  $J = 13.9, 4.1$  Hz, 1H), 2.83 – 2.57 (m, 2H), 2.47 (m,  $J = 13.9, 9.5$  Hz, 1H), 2.35 – 2.23 (m, 2H), 2.12 – 2.01 (m, 2H), 1.96 – 1.87 (m, 1H), 1.80 – 1.48 (m, 7H), 1.44 (d,  $J = 7.2$  Hz, 3H), 1.41 – 1.32 (m, 1H).  $^{13}\text{C NMR}$  (101 MHz, Chloroform-*d*)  $\delta$  219.81, 174.42, 138.80, 138.31 (d,  $J = 2.0$  Hz), 129.02, 127.72 (t,  $J = 293.3$  Hz), 127.41, 64.02, 54.87 (t,  $J = 2.1$  Hz), 50.83, 49.57 (t,  $J = 23.8$  Hz), 45.05, 38.04, 37.38, 35.10, 29.15, 27.73, 22.22, 20.45, 18.34 (d,  $J = 1.4$  Hz).  $^{19}\text{F NMR}$  (376 MHz, Chloroform-*d*)  $\delta$  -48.48 – -49.67 (m, 2F). **ESI-HRMS** exact mass calculated for  $[\text{C}_{22}\text{H}_{28}\text{Cl}_2\text{F}_2\text{O}_3\text{Na}^+]$ : 471.1276, found 471.1285.

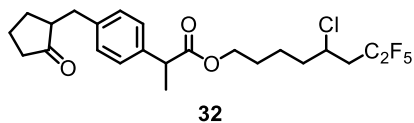

**5-Chloro-7,7,8,8,8-pentafluorooctyl 2-(4-((2-oxocyclopentyl)methyl)phenyl)propanoate (32)**: 60.7 mg colorless liquid was isolated, yield: 63%.  $^1\text{H NMR}$  (400 MHz, Chloroform-*d*)  $\delta$  7.19 (d,  $J = 8.0$  Hz, 2H), 7.10 (d,  $J = 8.0$  Hz, 2H), 4.17 – 4.10 (m, 1H), 4.10 – 4.03 (m, 2H), 3.67 (q,  $J = 7.1$  Hz, 1H), 3.08 (dd,  $J = 13.9, 4.1$  Hz, 1H), 2.63 – 2.37 (m,

3H), 2.36 – 2.26 (m, 2H), 2.14 – 2.01 (m, 2H), 1.98 – 1.88 (m, 1H), 1.87 – 1.76 (m, 1H), 1.76 – 1.65 (m, 2H), 1.65 – 1.49 (m, 4H), 1.46 (d,  $J = 7.2$  Hz, 3H), 1.42 – 1.31 (m, 1H).  $^{13}\text{C}$  NMR (101 MHz, Chloroform- $d$ )  $\delta$  219.91, 174.50, 138.86, 138.36 (d,  $J = 2.0$  Hz), 129.06, 127.46, 123.91 – 110.97 (2C, m), 64.06, 53.04, 50.90, 45.11, 38.99 (t,  $J = 20.7$  Hz), 38.08, 37.95, 35.15, 29.20, 27.77, 22.33, 20.48, 18.35.  $^{19}\text{F}$  NMR (376 MHz, Chloroform- $d$ )  $\delta$  -85.93 (d,  $J = 7.2$  Hz, 3F), -116.45 – -118.13 (m, 2F). **ESI-HRMS** exact mass calculated for  $[\text{C}_{23}\text{H}_{28}\text{ClF}_5\text{O}_3\text{Na}^+]$ : 505.1539, found 505.1550.

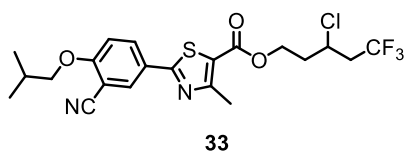

**3-Chloro-5,5,5-trifluoropentyl-2-(3-cyano-4-isobutoxyphenyl)-4-methylthiazole-5-carboxylate (33)**: 77.8 mg white solid was isolated, yield: 82%.  $^1\text{H}$  NMR (400 MHz, Chloroform- $d$ )  $\delta$  8.08 (d,  $J = 2.2$  Hz, 1H), 8.00 (dd,  $J = 8.8, 2.3$  Hz, 1H), 6.96 (d,  $J = 8.9$  Hz, 1H), 4.54 – 4.39 (m, 2H), 4.34 – 4.24 (m, 1H), 3.86 (d,  $J = 6.5$  Hz, 2H), 2.78 – 2.58 (m, 5H), 2.40 – 2.27 (m, 1H), 2.21 – 2.05 (m, 2H), 1.05 (d,  $J = 6.7$  Hz, 6H).  $^{13}\text{C}$  NMR (101 MHz, Chloroform- $d$ )  $\delta$  167.44, 162.55, 161.67, 161.58, 132.59, 131.98, 125.78, 125.10 (q,  $J = 277.6$  Hz), 121.06, 115.35, 112.66, 102.91, 75.71, 61.50, 50.64 (q,  $J = 3.1$  Hz), 42.46 (q,  $J = 28.7$  Hz), 36.83, 28.17, 19.03, 17.50.  $^{19}\text{F}$  NMR (376 MHz, Chloroform- $d$ )  $\delta$  -63.58 (s, 3F). **ESI-HRMS** exact mass calculated for  $[\text{C}_{21}\text{H}_{23}\text{ClF}_3\text{N}_2\text{O}_3\text{S}^+]$ : 475.1065, found 475.1068.

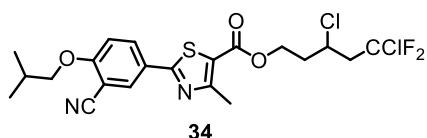

**3,5-Dichloro-5,5-difluoropentyl-2-(3-cyano-4-isobutoxyphenyl)-4-methylthiazole-5-carboxylate (34)**: 76.4 mg white solid was isolated, yield: 78%.  $^1\text{H}$  NMR (400 MHz, Chloroform- $d$ )  $\delta$  8.16 (d,  $J = 2.2$  Hz, 1H), 8.07 (dd,  $J = 8.8, 2.3$  Hz, 1H), 7.01 (d,  $J = 8.9$  Hz, 1H), 4.58 – 4.44 (m, 2H), 4.42 – 4.34 (m, 1H), 3.89 (d,  $J = 6.5$  Hz, 2H), 3.02 – 2.78 (m, 2H), 2.75 (s, 3H), 2.43 – 2.32 (m, 1H), 2.25 – 2.06 (m, 2H), 1.08 (d,  $J = 6.7$  Hz, 6H).  $^{13}\text{C}$  NMR (101 MHz, Chloroform- $d$ )  $\delta$  167.64, 162.68, 161.82, 161.75, 132.74, 132.21, 127.59 (t,  $J = 293.2$  Hz), 125.92, 121.20, 115.48, 112.75, 103.06, 75.81, 61.62, 51.73 (t,  $J = 2.6$  Hz), 49.91 (t,  $J = 24.1$  Hz), 36.91, 28.25, 19.15, 17.65.  $^{19}\text{F}$  NMR (376 MHz, Chloroform- $d$ )  $\delta$  -49.17 (dd,  $J = 18.4, 3.1$  Hz, 2F). **ESI-HRMS** exact mass calculated for  $[\text{C}_{21}\text{H}_{23}\text{Cl}_2\text{F}_2\text{N}_2\text{O}_3\text{S}^+]$ : 491.0769, found 491.0766.

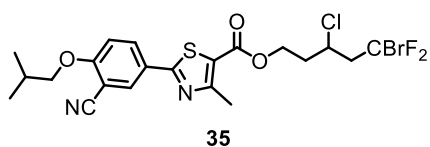

**5-Bromo-3-chloro-5,5-difluoropentyl-2-(3-cyano-4-isobutoxyphenyl)-4-methylthiazole-5-carboxylate (35)**: 70.5 mg yellow solid was isolated, yield: 66%.  $^1\text{H}$  NMR (400 MHz, Chloroform- $d$ )  $\delta$  8.14 – 7.94 (m, 2H), 7.03 – 6.92 (m, 1H), 4.59 – 4.27 (m, 3H), 3.90 – 3.79 (m, 2H), 3.09 – 2.81 (m, 2H), 2.77 – 2.64 (m, 3H), 2.42 – 2.27 (m, 1H), 2.28 – 2.02 (m, 2H), 1.11 – 1.00 (m, 6H).  $^{13}\text{C}$  NMR (101 MHz, Chloroform- $d$ )  $\delta$  167.34, 162.47, 161.54, 161.49, 132.53, 131.88, 125.70, 121.06, 119.98 (t,  $J = 306.7$  Hz), 115.29, 112.63, 102.82, 75.65, 61.46, 52.24 (t,  $J = 2.4$  Hz), 51.94 (t,  $J = 21.6$

Hz), 36.73, 28.11, 19.00, 17.51.  $^{19}\text{F}$  NMR (376 MHz, Chloroform-*d*)  $\delta$  -42.95 (s, 1F), -43.38 (s, 1F). **ESI-HRMS** exact mass calculated for  $[\text{C}_{21}\text{H}_{23}\text{BrClF}_2\text{N}_2\text{O}_3\text{S}^+]$ : 535.0264, found 535.0270.

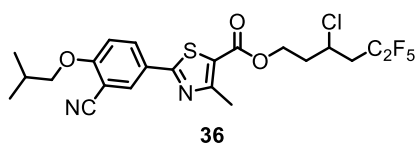

**3-Chloro-5,5,6,6,6-pentafluorohexyl-2-(3-cyano-4-isobutoxyphenyl)-4-methylthiazole-5-carboxylate (36)**: 83.8 mg yellow solid was isolated, yield: 81%.  $^1\text{H}$  NMR (400 MHz, Chloroform-*d*)  $\delta$  8.08 (d,  $J$  = 2.2 Hz, 1H), 8.00 (dd,  $J$  = 8.8, 2.2 Hz, 1H), 6.97 (d,  $J$  = 8.9 Hz, 1H), 4.56 – 4.34 (m, 3H), 3.86 (d,  $J$  = 6.5 Hz, 2H), 2.70 (s, 3H), 2.67 – 2.49 (m, 2H), 2.44 – 2.31 (m, 1H), 2.26 – 2.06 (m, 2H), 1.05 (d,  $J$  = 6.7 Hz, 6H).  $^{13}\text{C}$  NMR (101 MHz, Chloroform-*d*)  $\delta$  167.27, 162.45, 161.53, 161.44, 132.46, 131.78, 125.67, 120.98, 123.63 – 111.16 (2C, m), 120.98 115.24, 112.59, 102.78, 75.63, 61.45, 49.85, 39.10 (t,  $J$  = 20.7 Hz), 37.26, 28.10, 18.90, 17.37.  $^{19}\text{F}$  NMR (376 MHz, Chloroform-*d*)  $\delta$  -85.79 – -85.86 (m, 3F), -116.78 – -117.34 (m, 2F). **ESI-HRMS** exact mass calculated for  $[\text{C}_{22}\text{H}_{23}\text{ClF}_5\text{N}_2\text{O}_3\text{S}^+]$ : 525.1033, found 525.1041.

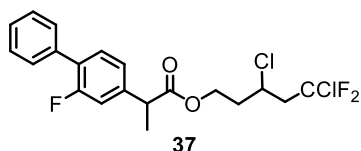

**5,7-Dichloro-7,7-difluoroheptyl 2-(2-fluoro-[1,1'-biphenyl]-4-yl)propanoate (37)**: 61.9 mg colorless liquid was isolated, yield: 74%.  $^1\text{H}$  NMR (400 MHz, Chloroform-*d*)  $\delta$  7.57 (d,  $J$  = 7.6 Hz, 2H), 7.51 – 7.33 (m, 4H), 7.16 (t,  $J$  = 9.1 Hz, 2H), 4.45 – 4.26 (m, 2H), 4.26 – 4.13 (m, 1H), 3.85 – 3.74 (m, 1H), 2.93 – 2.60 (m, 2H), 2.31 – 2.14 (m, 1H), 2.04 – 1.91 (m, 1H), 1.58 (d,  $J$  = 7.2 Hz, 3H).  $^{13}\text{C}$  NMR (101 MHz, Chloroform-*d*)  $\delta$  173.61 (d,  $J$  = 1.7 Hz), 159.75 (d,  $J$  = 248.5 Hz), 141.62 (dd,  $J$  = 7.5, 3.5 Hz), 135.44, 130.96 (d,  $J$  = 4.0 Hz), 128.97 (d,  $J$  = 2.8 Hz), 128.50, 128.00 (dd,  $J$  = 1.0, 13.1 Hz), 127.75, 127.57 (td,  $J$  = 294.9, 3.0 Hz), 123.54, 115.22 (dd,  $J$  = 23.7, 3.7 Hz), 61.09 (d,  $J$  = 2.9 Hz), 51.66 – 51.55 (m), 49.64 (t,  $J$  = 24.0 Hz), 45.00 (dd,  $J$  = 1.0, 8.1 Hz), 36.78 (d,  $J$  = 5.0 Hz), 18.19 (d,  $J$  = 0.9 Hz).  $^{19}\text{F}$  NMR (376 MHz, Chloroform-*d*)  $\delta$  -48.45 – -49.79 (m, 2F), -117.32 (d,  $J$  = 10.3 Hz, 1F). **ESI-HRMS** exact mass calculated for  $[\text{C}_{20}\text{H}_{19}\text{Cl}_2\text{F}_3\text{O}_2\text{Na}^+]$ : 441.0606, found 441.0613.

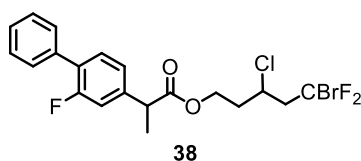

**5-Bromo-3-chloro-5,5-difluoropentyl 2-(2-fluoro-[1,1'-biphenyl]-4-yl)propanoate (38)**: 62.8 mg colorless liquid was isolated, yield: 68%.  $^1\text{H}$  NMR (400 MHz, Chloroform-*d*)  $\delta$  7.57 (d,  $J$  = 7.5 Hz, 2H), 7.51 – 7.36 (m, 4H), 7.17 (t,  $J$  = 8.9 Hz, 2H), 4.44 – 4.27 (m, 2H), 4.26 – 4.15 (m, 1H), 3.85 – 3.75 (m, 1H), 2.99 – 2.70 (m, 2H), 2.28 – 2.14 (m, 1H), 2.04 – 1.92 (m, 1H), 1.58 (d,  $J$  = 7.2 Hz, 3H).  $^{13}\text{C}$  NMR (101 MHz, Chloroform-*d*)  $\delta$  173.54, 159.71 (d,  $J$  = 248.5 Hz), 141.61 (dd,  $J$  = 7.3, 3.8 Hz), 135.39, 130.93 (d,  $J$  = 3.9 Hz), 128.94 (d,  $J$  = 2.8 Hz), 128.48, 127.93 (dd,  $J$  = 14.1, 1.0 Hz), 127.72, 123.53, 120.06 (t,  $J$  = 306.9 Hz), 115.21 (dd,  $J$  = 23.6, 2.5 Hz), 61.04 (d,  $J$  = 3.0 Hz), 52.30 – 52.08 (m), 51.80 (t,  $J$  = 21.6 Hz), 44.95 (dd,  $J$  = 1.0, 8.0 Hz), 36.67 (d,  $J$  = 4.0 Hz), 18.19 (d,  $J$  = 1.1 Hz).  $^{19}\text{F}$  NMR (376 MHz,

Chloroform-*d*)  $\delta$  -41.90 – -43.50 (m, 2F), -117.24 (d,  $J$  = 10.4 Hz, 1F). **ESI-HRMS** exact mass calculated for  $[\text{C}_{20}\text{H}_{19}\text{BrClF}_3\text{O}_2\text{Na}^+]$ : 485.0101, found 485.0101.

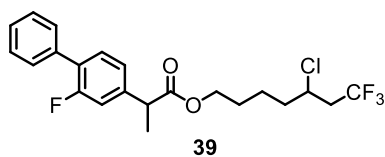

**5-Chloro-7,7,7-trifluoroheptyl 2-(2-fluoro-[1,1'-biphenyl]-4-yl)propanoate (39)**: 68.0 mg colorless liquid was isolated, yield: 79%. **<sup>1</sup>H NMR** (400 MHz, Chloroform-*d*)  $\delta$  7.60 – 7.53 (m, 2H), 7.49 – 7.34 (m, 4H), 7.21 – 7.13 (m, 2H), 4.14 (t,  $J$  = 6.3 Hz, 2H), 4.11 – 4.04 (m, 1H), 3.78 (q,  $J$  = 7.2 Hz, 1H), 2.68 – 2.41 (m, 2H), 1.88 – 1.60 (m, 5H), 1.57 (d,  $J$  = 7.2 Hz, 3H), 1.51 – 1.40 (m, 1H). **<sup>13</sup>C NMR** (101 MHz, Chloroform-*d*)  $\delta$  173.98, 159.75 (d,  $J$  = 248.3 Hz), 141.96 (dd,  $J$  = 7.7, 1.3 Hz), 135.51, 130.86 (d,  $J$  = 4.2 Hz), 128.99 (d,  $J$  = 2.9 Hz), 128.52, 127.88 (d,  $J$  = 13.5 Hz), 127.75, 125.30 (q,  $J$  = 277.6 Hz), 123.63 (d,  $J$  = 3.3 Hz), 115.30 (d,  $J$  = 23.6 Hz), 64.50, 53.93 (d,  $J$  = 2.5 Hz), 45.13, 42.38 (q,  $J$  = 28.3 Hz), 37.50, 27.89, 22.44 (d,  $J$  = 1.6 Hz), 18.35. **<sup>19</sup>F NMR** (376 MHz, Chloroform-*d*)  $\delta$  -63.73 (s, 3F), -117.58 (s, 1F). **ESI-HRMS** exact mass calculated for  $[\text{C}_{22}\text{H}_{23}\text{ClF}_4\text{O}_2\text{Na}^+]$ : 453.1215, found 453.1216.

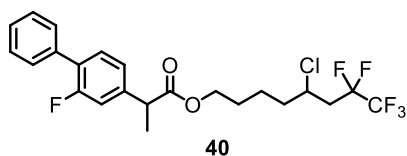

**5-Chloro-7,7,8,8,8-pentafluoroethyl 2-(2-fluoro-[1,1'-biphenyl]-4-yl)propanoate (40)**: 71.1 mg colorless liquid was isolated, yield: 74%. **<sup>1</sup>H NMR** (400 MHz, Chloroform-*d*)  $\delta$  7.61 – 7.55 (m, 2H), 7.50 – 7.41 (m, 3H), 7.41 – 7.36 (m, 1H), 7.23 – 7.15 (m, 2H), 4.25 – 4.19 (m, 1H), 4.16 (t,  $J$  = 6.2 Hz, 2H), 3.80 (q,  $J$  = 7.1 Hz, 1H), 2.70 – 2.38 (m, 2H), 1.94 – 1.61 (m, 5H), 1.58 (d,  $J$  = 7.2 Hz, 3H), 1.54 – 1.43 (m, 1H). **<sup>13</sup>C NMR** (101 MHz, Chloroform-*d*)  $\delta$  173.54, 160.94, 158.47, 141.61 (dd,  $J$  = 7.3, 3.8 Hz), 135.39, 130.93 (d,  $J$  = 3.9 Hz), 128.96, 128.93, 128.48, 127.85 (d,  $J$  = 13.5 Hz), 127.72, 123.11 – 117.01 (2C, C<sub>2</sub>F<sub>5</sub>), 115.21 (dd,  $J$  = 23.6, 2.5 Hz), 61.04 (d,  $J$  = 3.0 Hz), 52.32 – 52.09 (m), 51.80 (t,  $J$  = 21.6 Hz), 44.96 (dd,  $J$  = 8.1, 1.0 Hz), 36.69, 36.65, 18.18 (d,  $J$  = 1.01 Hz). **<sup>19</sup>F NMR** (376 MHz, Chloroform-*d*)  $\delta$  -85.90 (s, 3F), -117.09 (s, 1F), -117.35 (s, 1F), -117.60 (s, 1F). **ESI-HRMS** exact mass calculated for  $[\text{C}_{23}\text{H}_{23}\text{ClF}_6\text{O}_2\text{Na}^+]$ : 503.1183, found 503.1189.

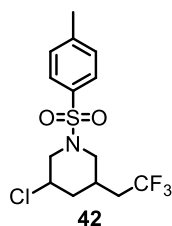

**3-Chloro-1-tosyl-5-(2,2,2-trifluoroethyl)piperidine (42)**: 44.7 mg colorless liquid was isolated, yield: 63%. **<sup>1</sup>H NMR** (400 MHz, Chloroform-*d*)  $\delta$  7.71 (d,  $J$  = 8.2 Hz, 2H), 7.34 (d,  $J$  = 8.0 Hz, 2H), 3.48 (dd,  $J$  = 10.3, 7.0 Hz, 1H), 3.39 (d,  $J$  = 4.6 Hz, 2H), 3.36 (d,  $J$  = 5.4 Hz, 1H), 3.20 – 3.02 (m, 2H), 2.57 – 2.45 (m, 2H), 2.43 (s, 3H), 2.28 – 2.11 (m, 1H), 2.05 – 1.86 (m, 1H). **<sup>13</sup>C NMR** (101 MHz, Chloroform-*d*)  $\delta$  144.05, 133.38, 129.96, 127.51, 126.33 (q,  $J$  = 278.0 Hz), 51.16 (d,  $J$  = 1.6 Hz), 50.39, 43.33, 42.13, 35.03 (q,  $J$  = 2.5 Hz), 31.93 (q,  $J$  = 29.1 Hz), 21.63. **<sup>19</sup>F NMR** (376 MHz, Chloroform-*d*)  $\delta$  -63.71 (s, 3F). **ESI-HRMS** exact mass calculated for  $[\text{C}_{14}\text{H}_{17}\text{ClF}_3\text{O}_2\text{SNa}^+]$ : 377.0560, found 377.0565.



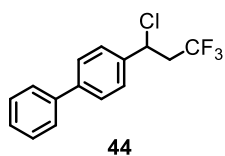

**4-(1-Chloro-3,3,3-trifluoropropyl)-1,1'-biphenyl (44):** 9.7 mg yellow solid was isolated, yield: 17%.  $^1\text{H NMR}$  (400 MHz, Chloroform-*d*)  $\delta$  7.66 – 7.53 (m, 4H), 7.50 – 7.41 (m, 4H), 7.40 – 7.34 (m, 1H), 5.17 (t,  $J = 7.0$  Hz, 1H), 3.14 – 2.83 (m, 2H).  $^{13}\text{C NMR}$  (101 MHz, Chloroform-*d*)  $\delta$  142.18, 140.34, 138.75, 129.01, 127.85, 127.82, 127.38, 127.28, 129.01 – 120.76 (m), 54.91 – 54.52 (m), 43.87 (q,  $J = 28.2$  Hz).  $^{19}\text{F NMR}$  (376 MHz, Chloroform-*d*)  $\delta$  -63.98 (s, 3F) **EI-MS** calculated for  $[\text{C}_{15}\text{H}_{12}\text{ClF}_3]$ : 284.1, found 284.1.

## 6. Reference

1. Y. Ouyang, X.-H. Xu, F.-L. Qing, *Angew. Chem., Int. Ed.*, 2019, **58**, 18508-18512.
2. Y. Zhang, S. Torker, M. Sigrist, N. Bregović, P. Dydio, *J. Am. Chem. Soc.*, 2020, **142**, 18251-18265.
3. M. S. Jung, W. S. Kim, Y. H. Shin, H. J. Jin, Y. S. Kim, E. J. Kang, *Org. Lett.*, 2012, **14**, 6262-6265.
4. (a) A. S. Pirzer, E. M. Alvarez, H. Friedrich, M. R. Heinrich, *Chem.-Eur. J.*, 2019, **25**, 2786-2792;  
(b) X. Jiang, Y. Lan, Y. Hao, K. Jiang, J. He, J. Zhu, S. Jia, J. Song, S.-J. Li, L. Niu, *Nat. Commun.*, 2024, **15**, 6115.
5. M. J. Frisch, G. W. Trucks, H. B. Schlegel et al., Gaussian16, Gaussian, Inc, Wallingford, CT, 2016.
6. F. Furche and R. Ahlrichs, *J. Chem. Phys.*, 2002, **117**, 7433-7447.
7. G. Scalmani, M. J. Frisch, *J. Chem. Phys.*, 2006, **124**, 094107.
8. D.-C. Fang, THERMO, Beijing Normal University, Beijing, China, 2013.

# 7 Copies of $^1\text{H}$ NMR, $^{13}\text{C}$ NMR and $^{19}\text{F}$ NMR Spectra

7.942  
7.937  
7.932  
7.921  
7.916  
7.912  
7.249  
7.229  
4.340  
4.325  
4.309  
4.155  
4.151  
4.147  
4.142  
4.137  
4.133  
4.129  
4.124  
4.120  
4.115  
4.111  
4.101  
2.684  
2.665  
2.658  
2.653  
2.645  
2.640  
2.627  
2.619  
2.607  
2.601  
2.593  
2.581  
2.575  
2.567  
2.556  
2.542  
2.529  
2.517  
2.503  
2.409  
1.938  
1.928  
1.913  
1.903  
1.893  
1.878  
1.866  
1.854  
1.843  
1.830  
1.820  
1.803  
1.800  
1.784  
1.778  
1.763  
1.755  
1.739  
1.727  
1.715  
1.704  
1.633  
1.627  
1.617  
1.611  
1.608  
1.602  
1.594  
1.587

$^1\text{H}$  NMR, 400 MHz,  $\text{CDCl}_3$

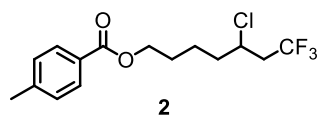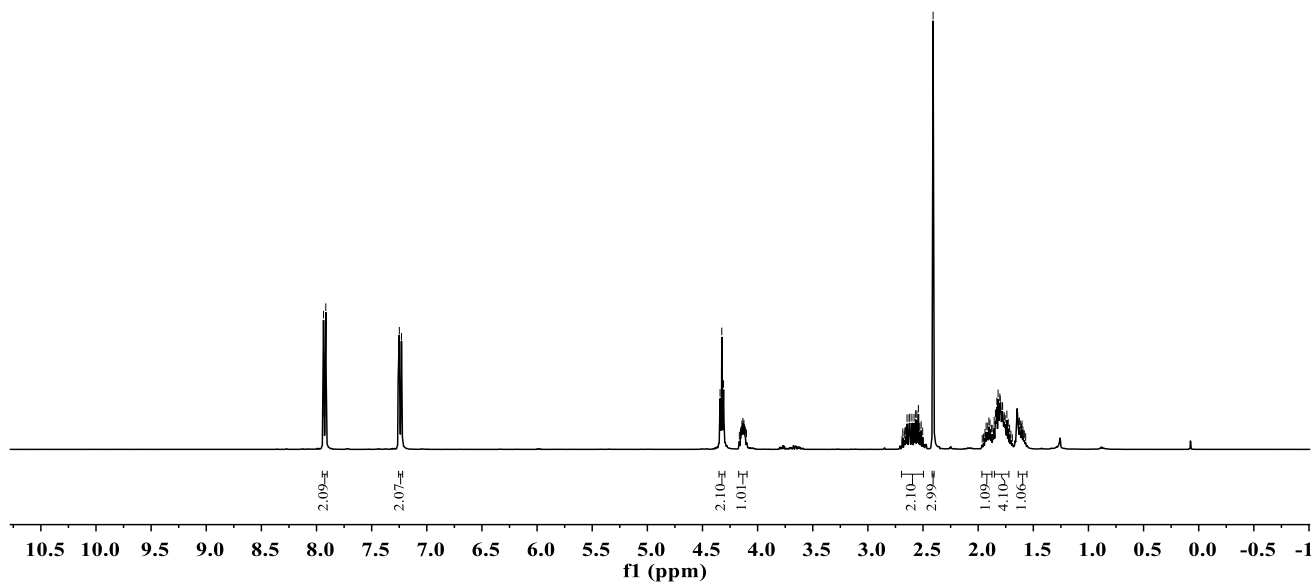

166.80  
143.75  
129.69  
129.48  
129.22  
127.66  
126.73  
123.97  
121.21  
64.41  
54.09  
54.06  
54.02  
53.99  
43.00  
42.72  
42.44  
42.15  
37.73  
28.18  
22.78  
21.78

$^{13}\text{C}$  NMR, 101 MHz,  $\text{CDCl}_3$

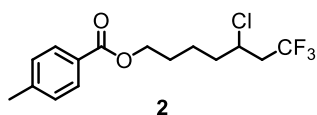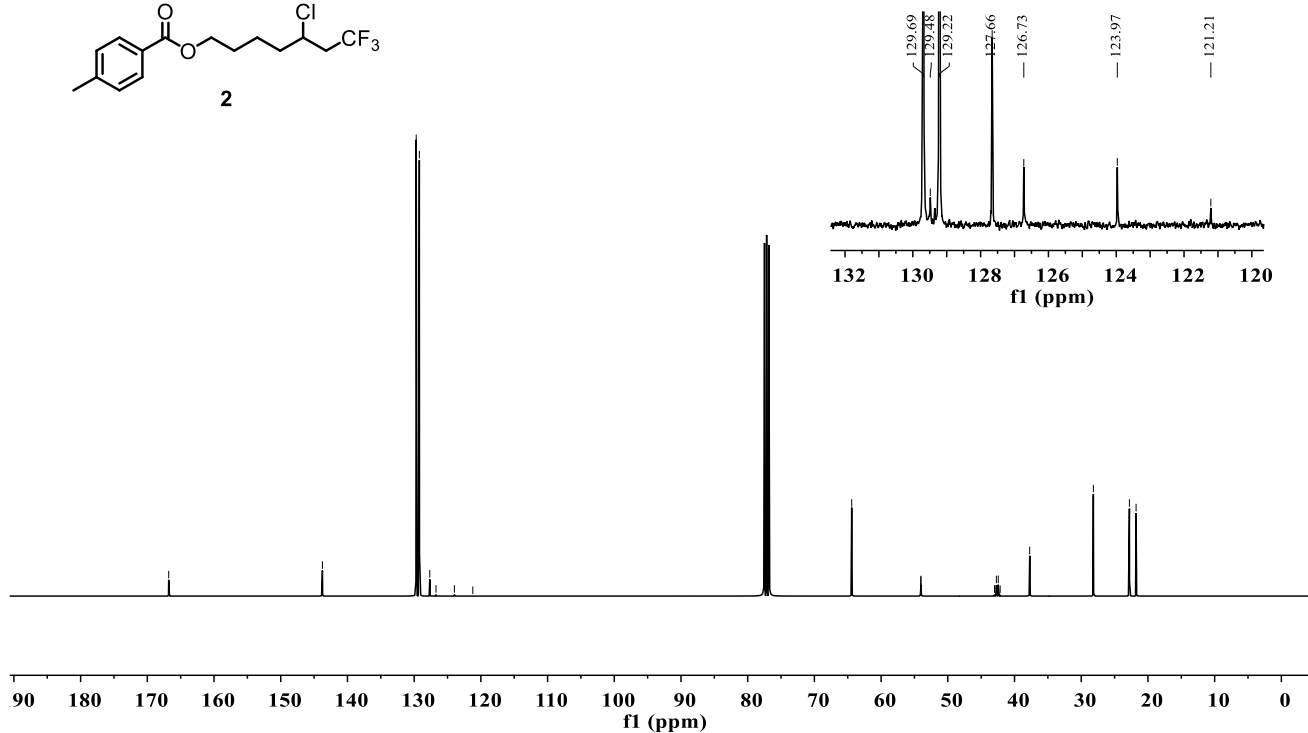

<sup>19</sup>F NMR, 376 MHz, CDCl<sub>3</sub>

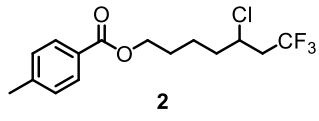

— -63.79

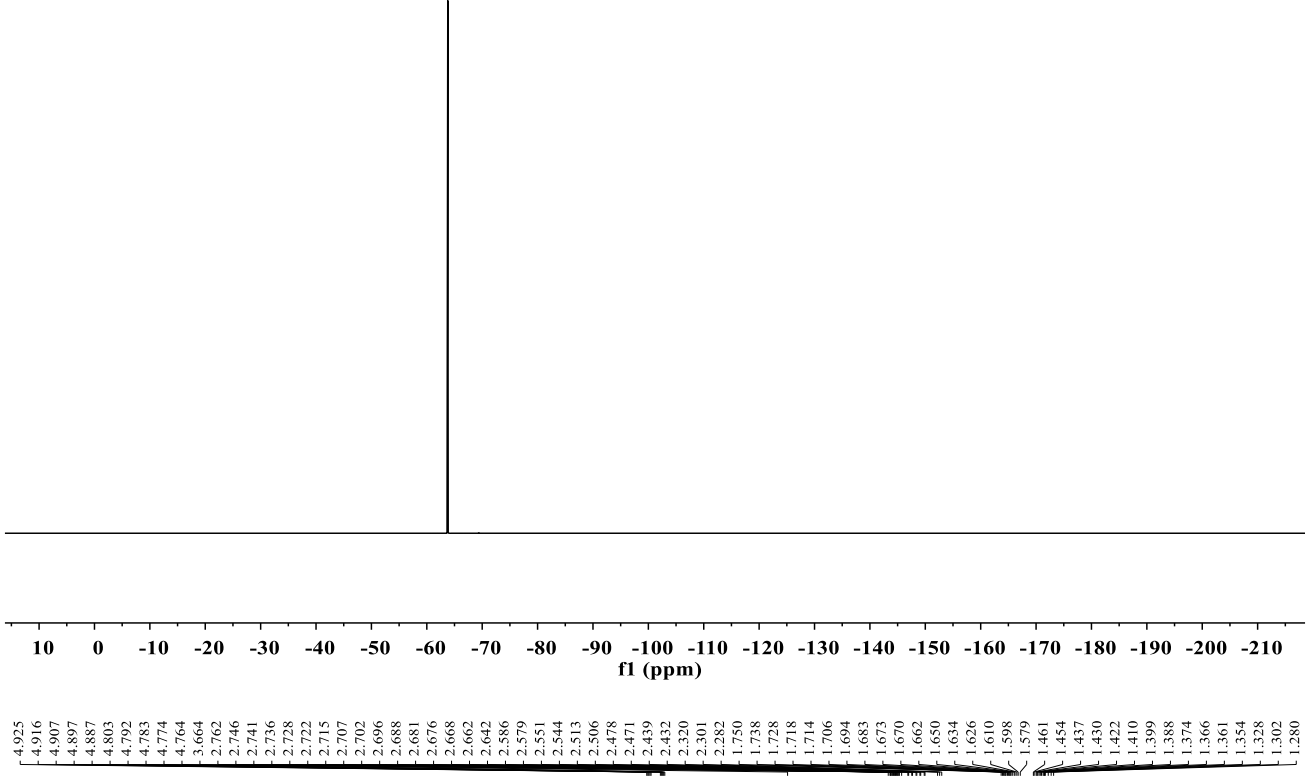

<sup>1</sup>H NMR, 400 HMz, CDCl<sub>3</sub>

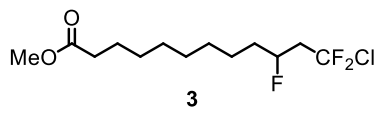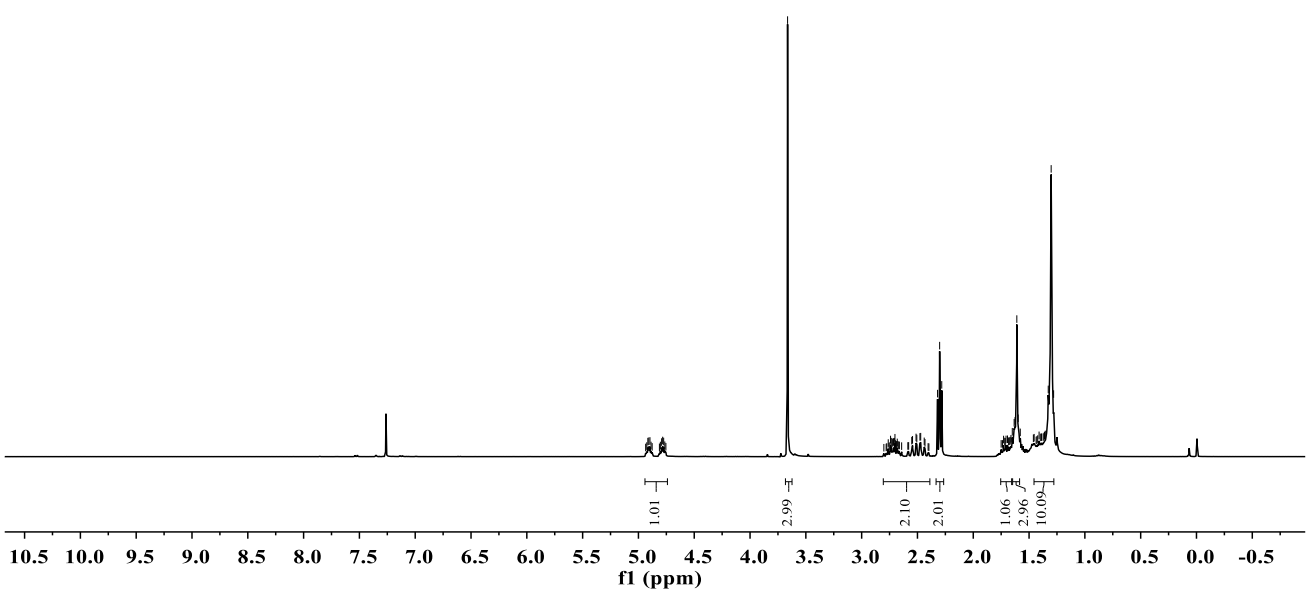

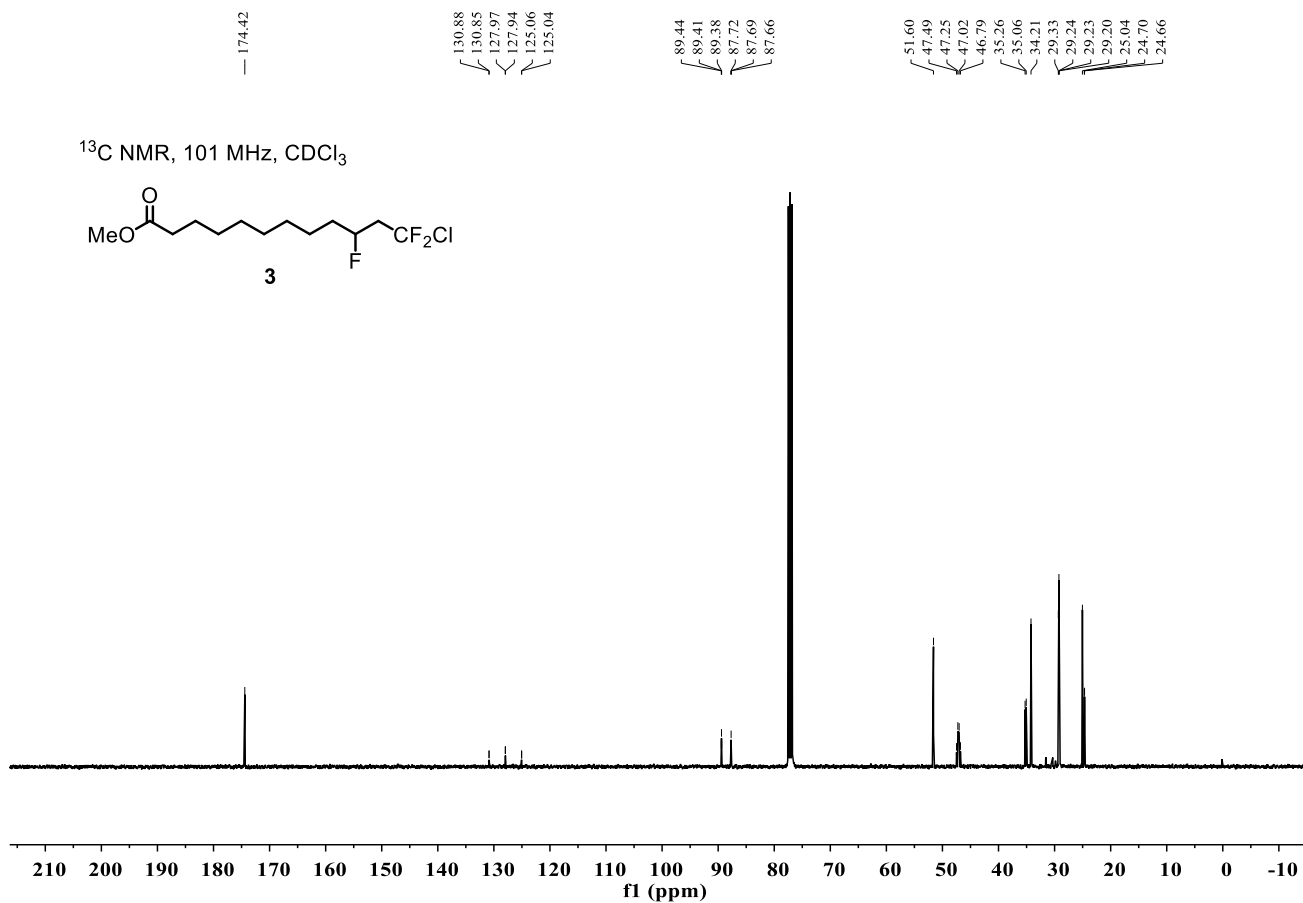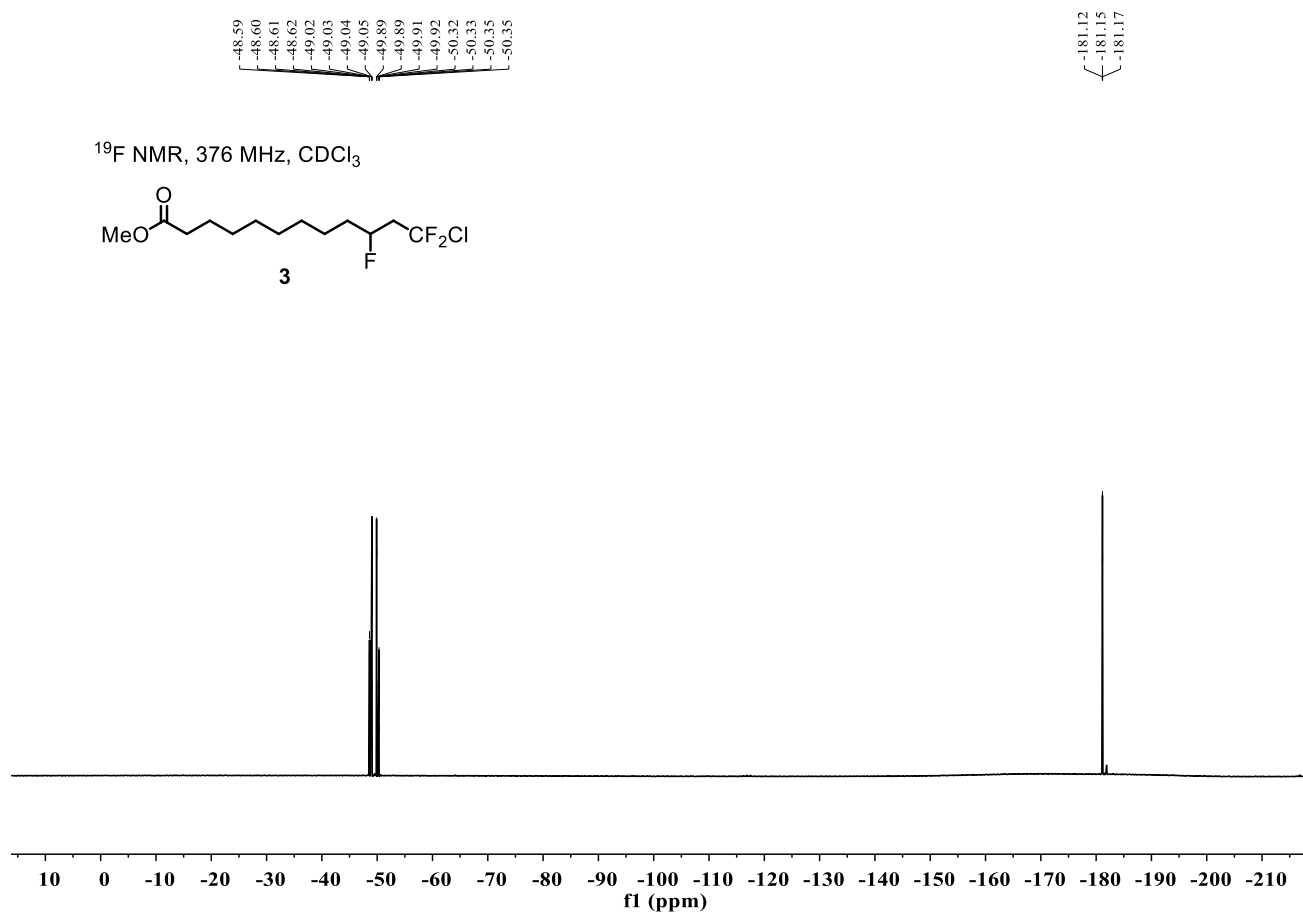

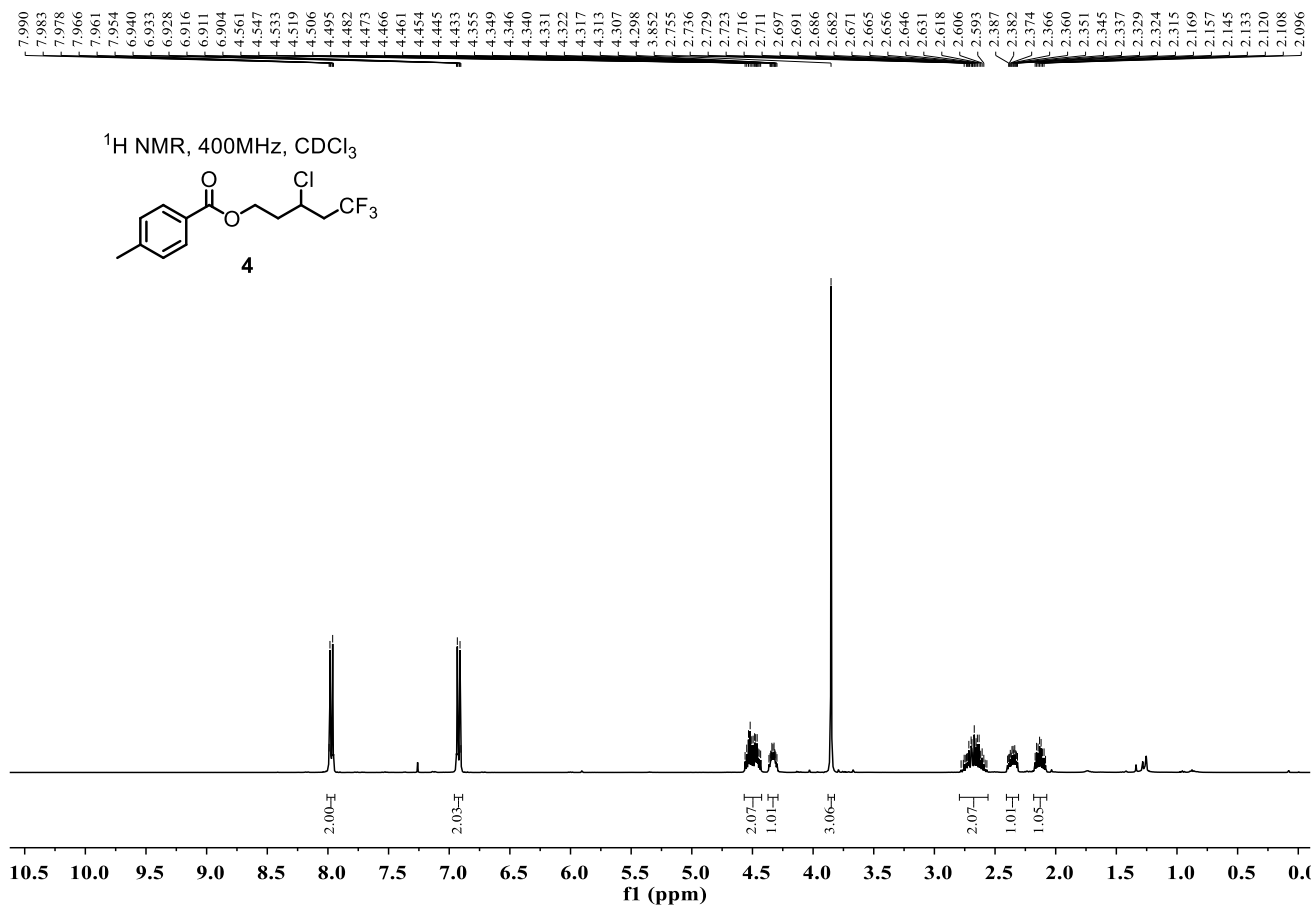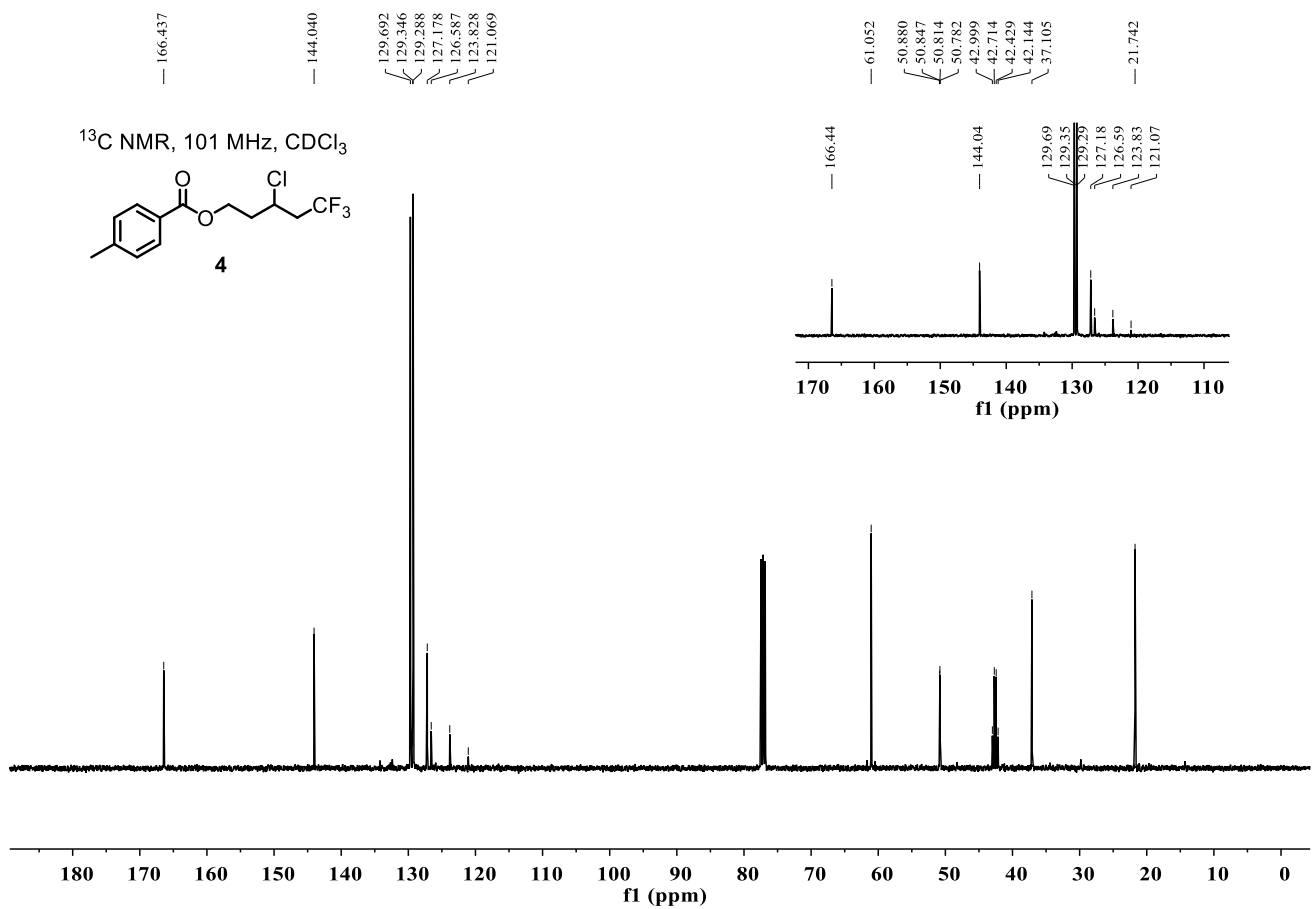

<sup>19</sup>F NMR, 376 MHz, CDCl<sub>3</sub>

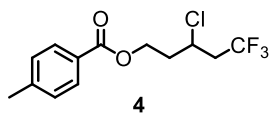

-63.98

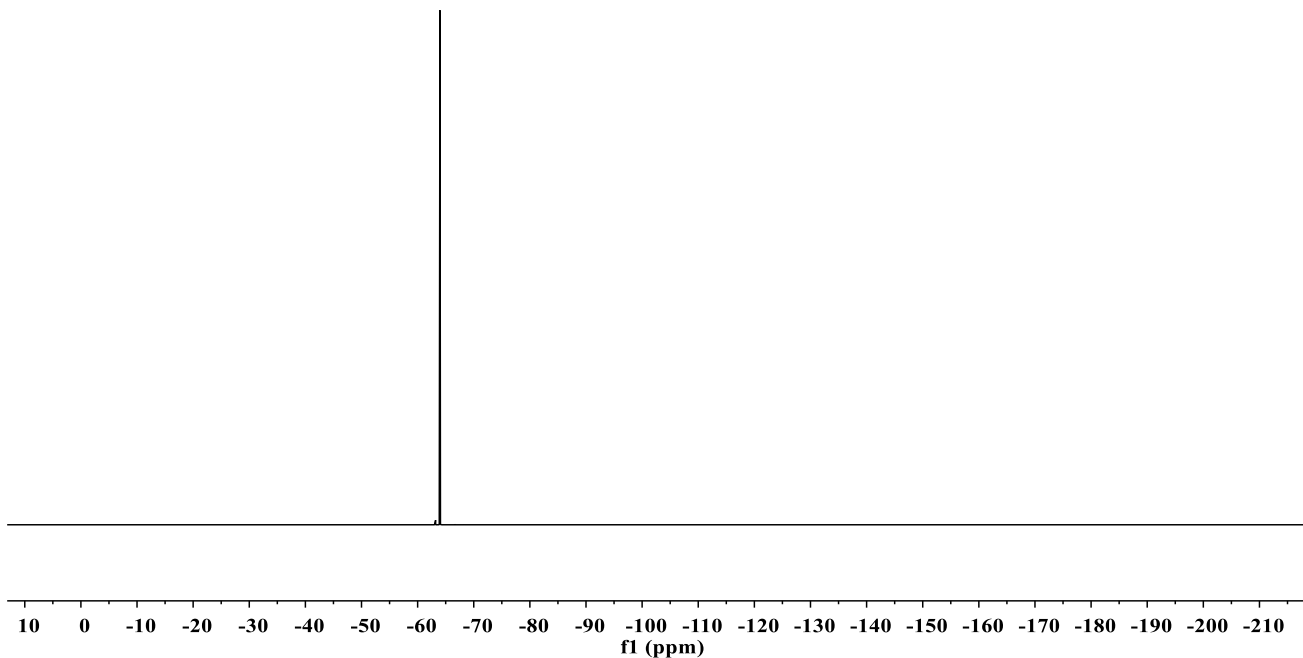

7.941 7.920 7.241 7.221 4.312 4.295 4.279 4.131 4.118 4.109 4.098 4.088 4.079 4.066 2.650 2.637 2.631 2.624 2.618 2.611 2.605 2.592 2.586 2.573 2.566 2.561 2.548 2.540 2.536 2.522 2.510 2.497 2.484 2.402 1.844 1.832 1.821 1.807 1.796 1.776 1.757 1.739 1.721 1.707 1.685 1.685 1.439 1.420 1.405 1.379 1.339

<sup>1</sup>H NMR, 400 MHz, CDCl<sub>3</sub>

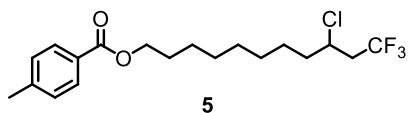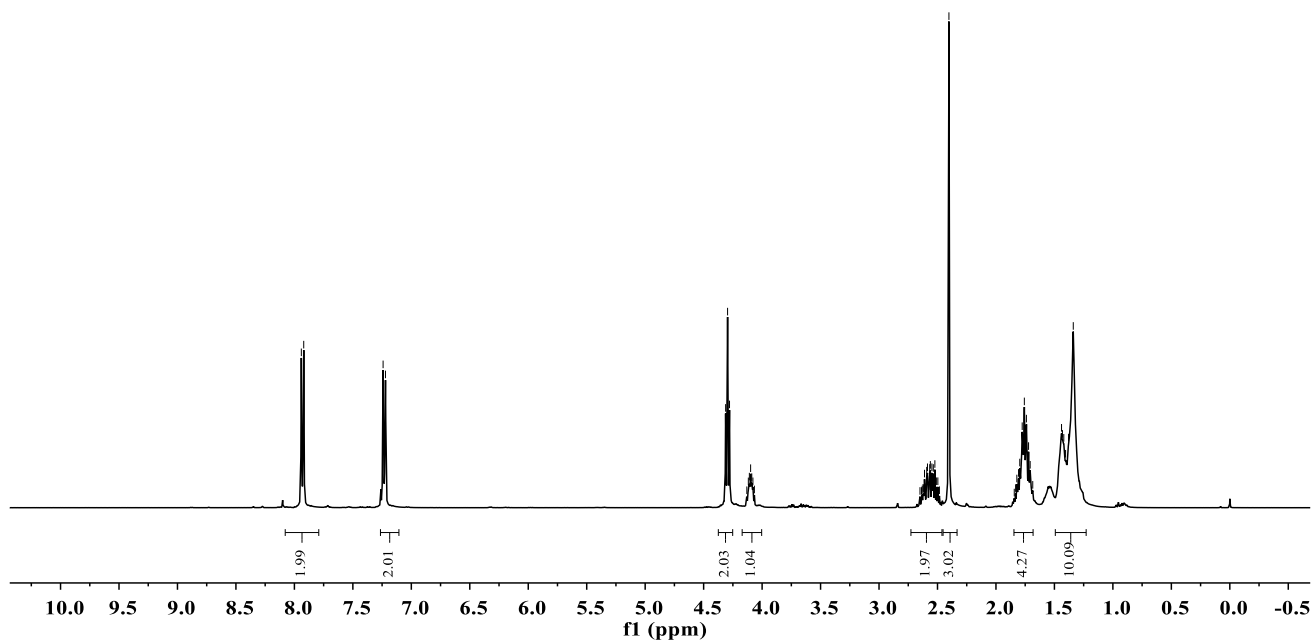

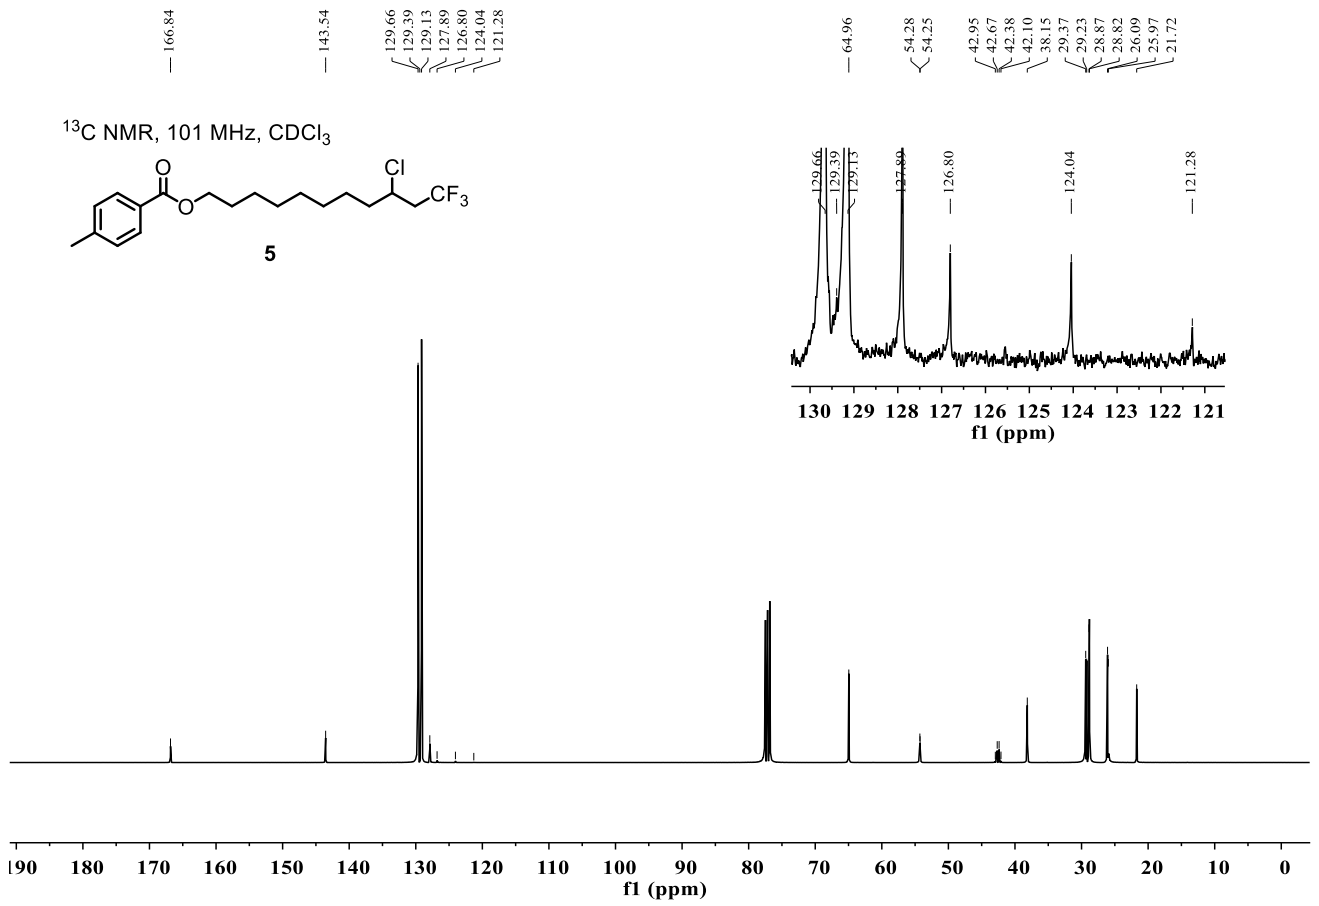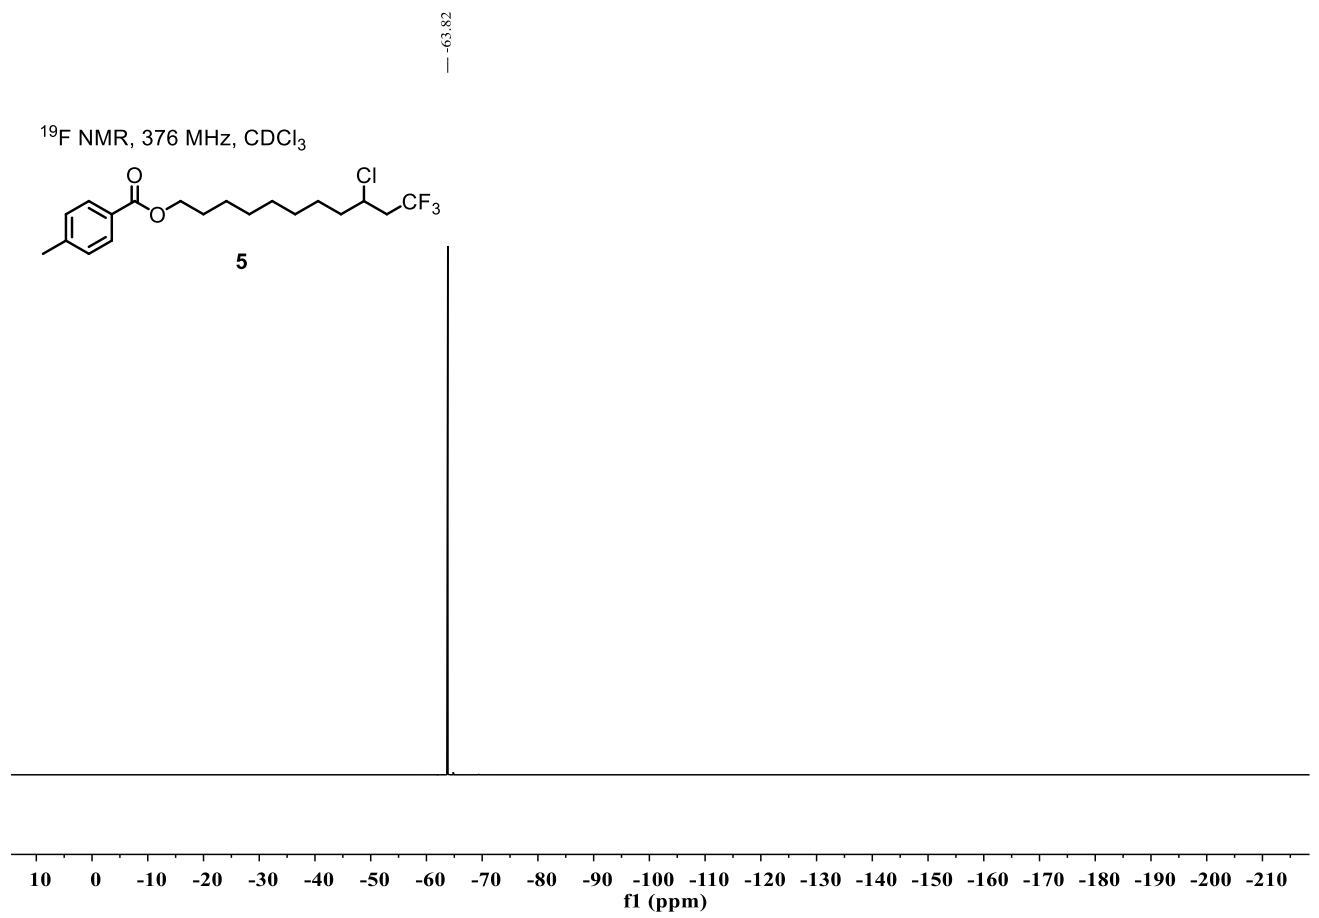

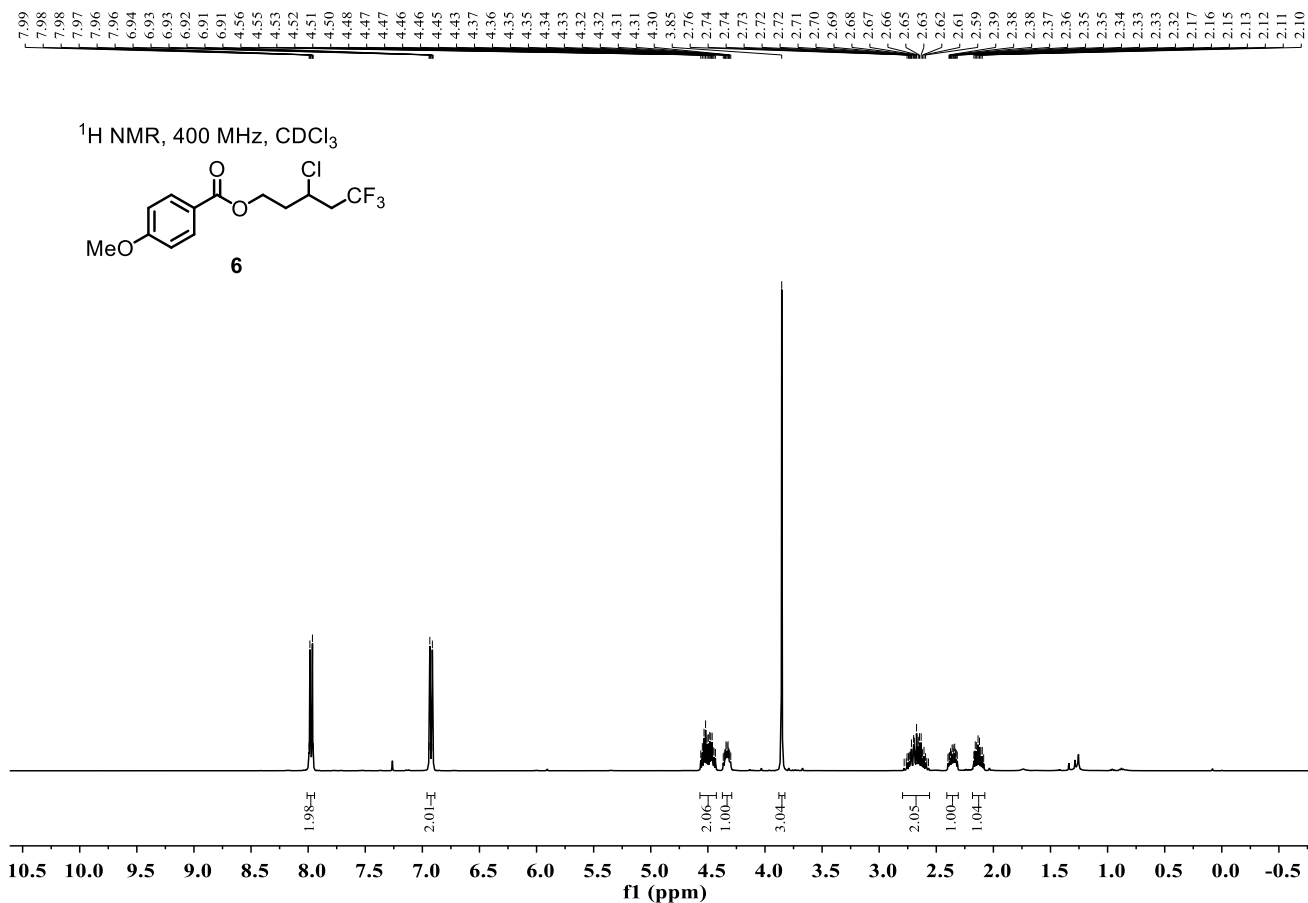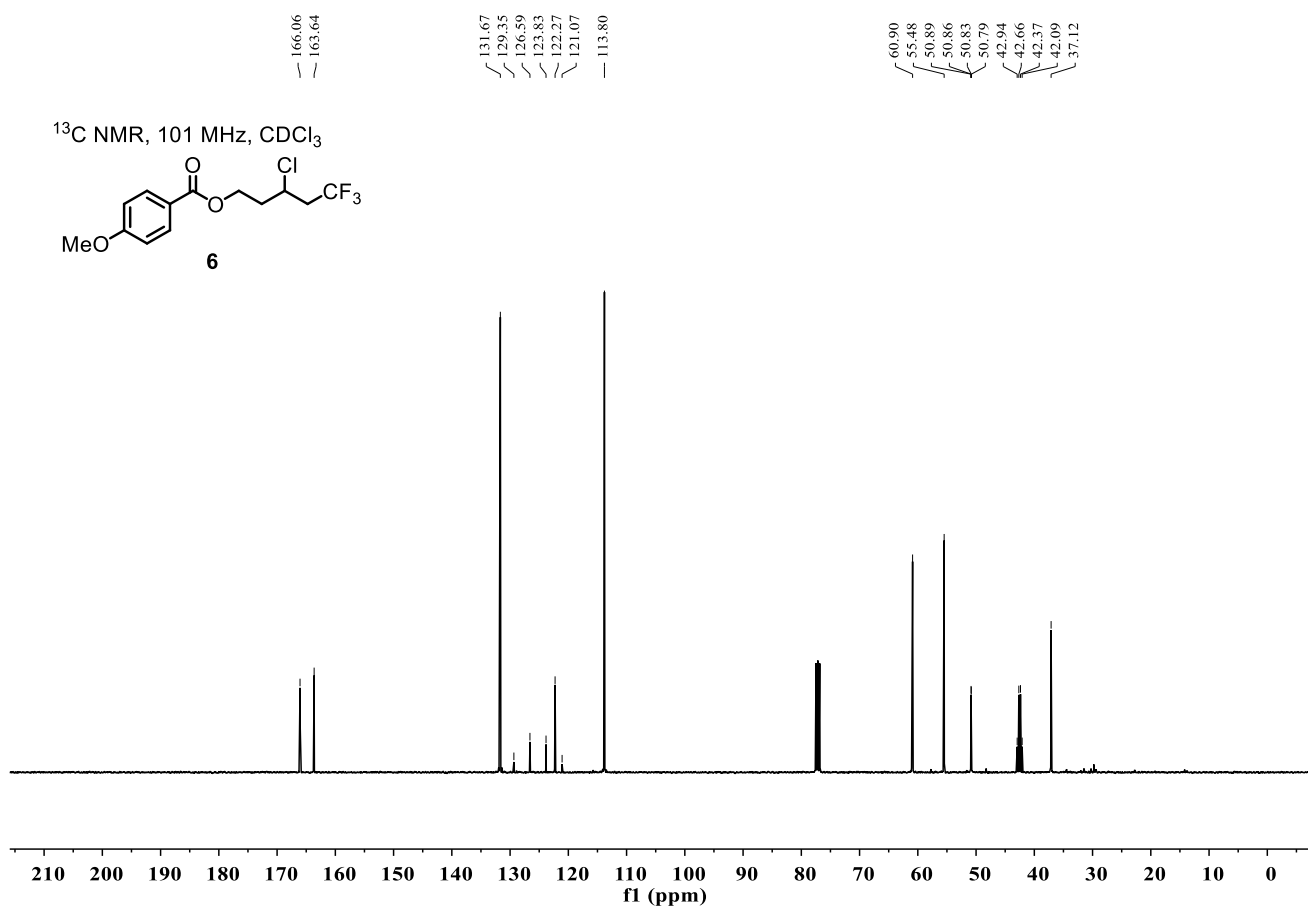



<sup>19</sup>F NMR, 376 MHz, CDCl<sub>3</sub>

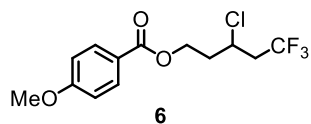

-63.65

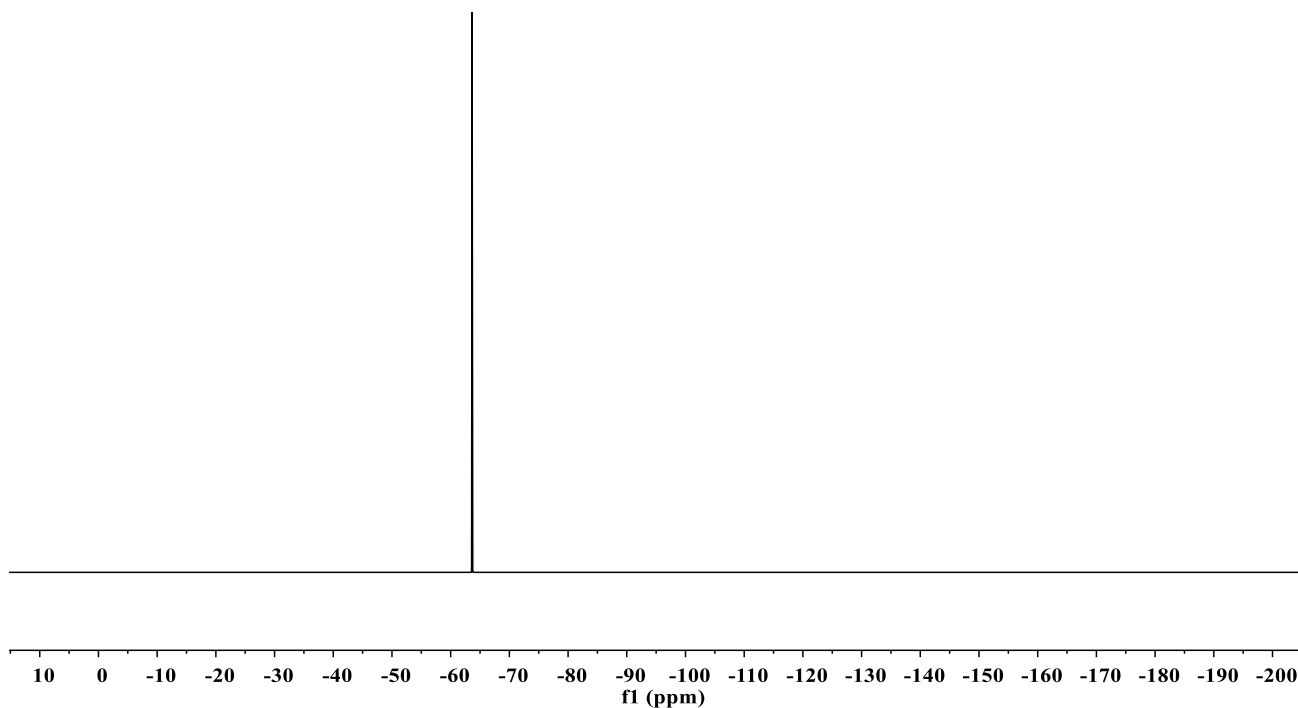

8.001  
7.994  
7.989  
7.977  
7.972  
7.965  
6.927  
6.920  
6.915  
6.903  
6.898  
6.891  
6.891  
4.312  
4.297  
4.281  
4.140  
4.131  
4.121  
4.112  
4.103  
3.840  
4.089  
2.668  
2.655  
2.649  
2.642  
2.636  
2.629  
2.623  
2.610  
2.603  
2.596  
2.585  
2.578  
2.570  
2.556  
2.544  
2.531  
2.518  
2.505  
2.492  
1.919  
1.908  
1.894  
1.883  
1.873  
1.860  
1.849  
1.838  
1.823  
1.814  
1.807  
1.798  
1.792  
1.778  
1.765  
1.757  
1.744  
1.734  
1.721  
1.709  
1.697  
1.685  
1.631  
1.621  
1.615  
1.608  
1.599  
1.590  
1.584  
1.575  
1.568

<sup>1</sup>H NMR, 400 MHz, CDCl<sub>3</sub>

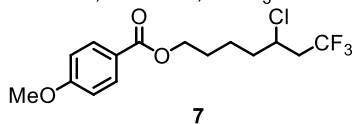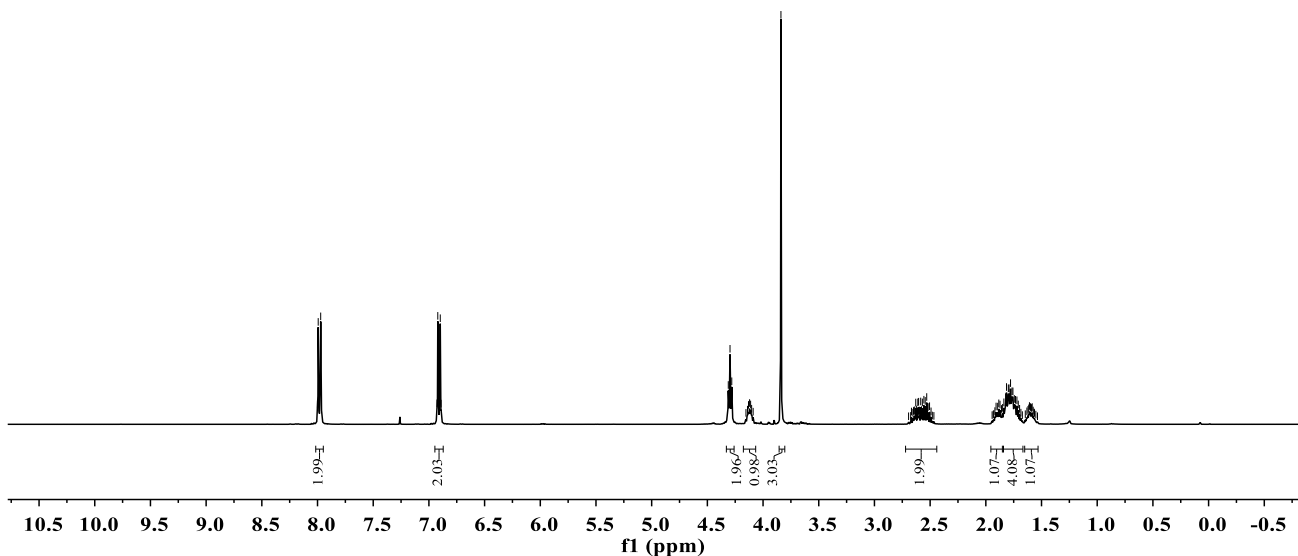

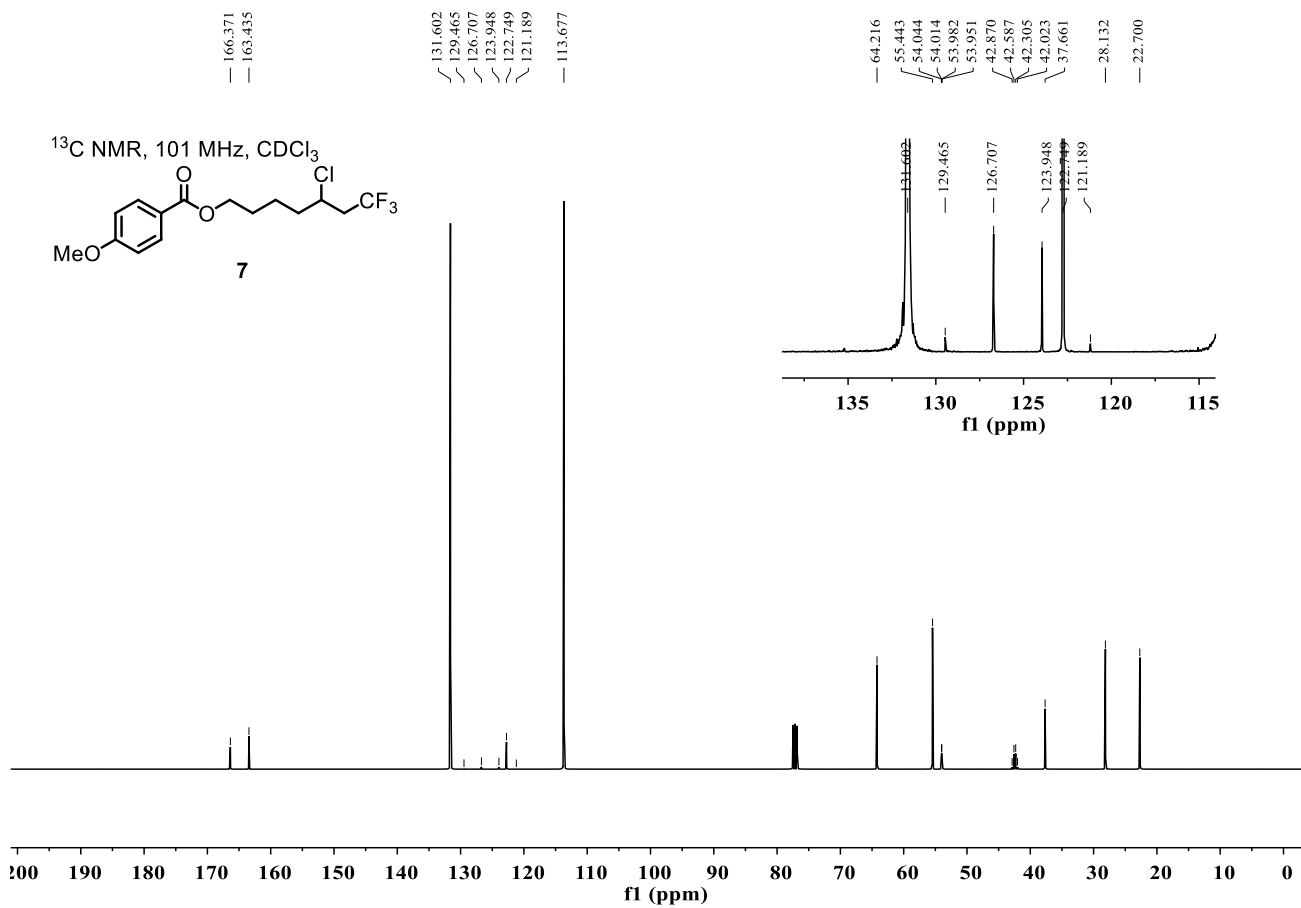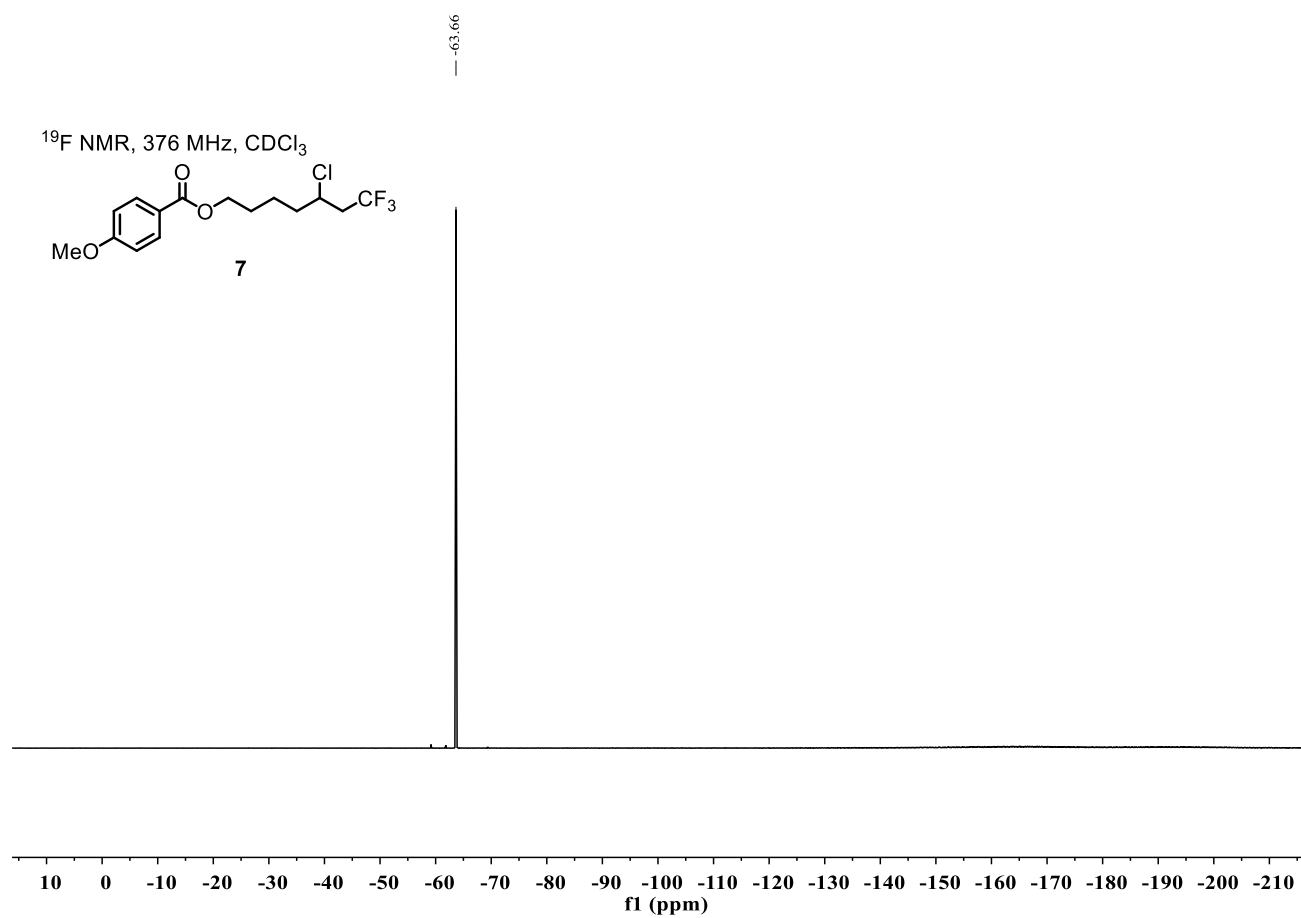

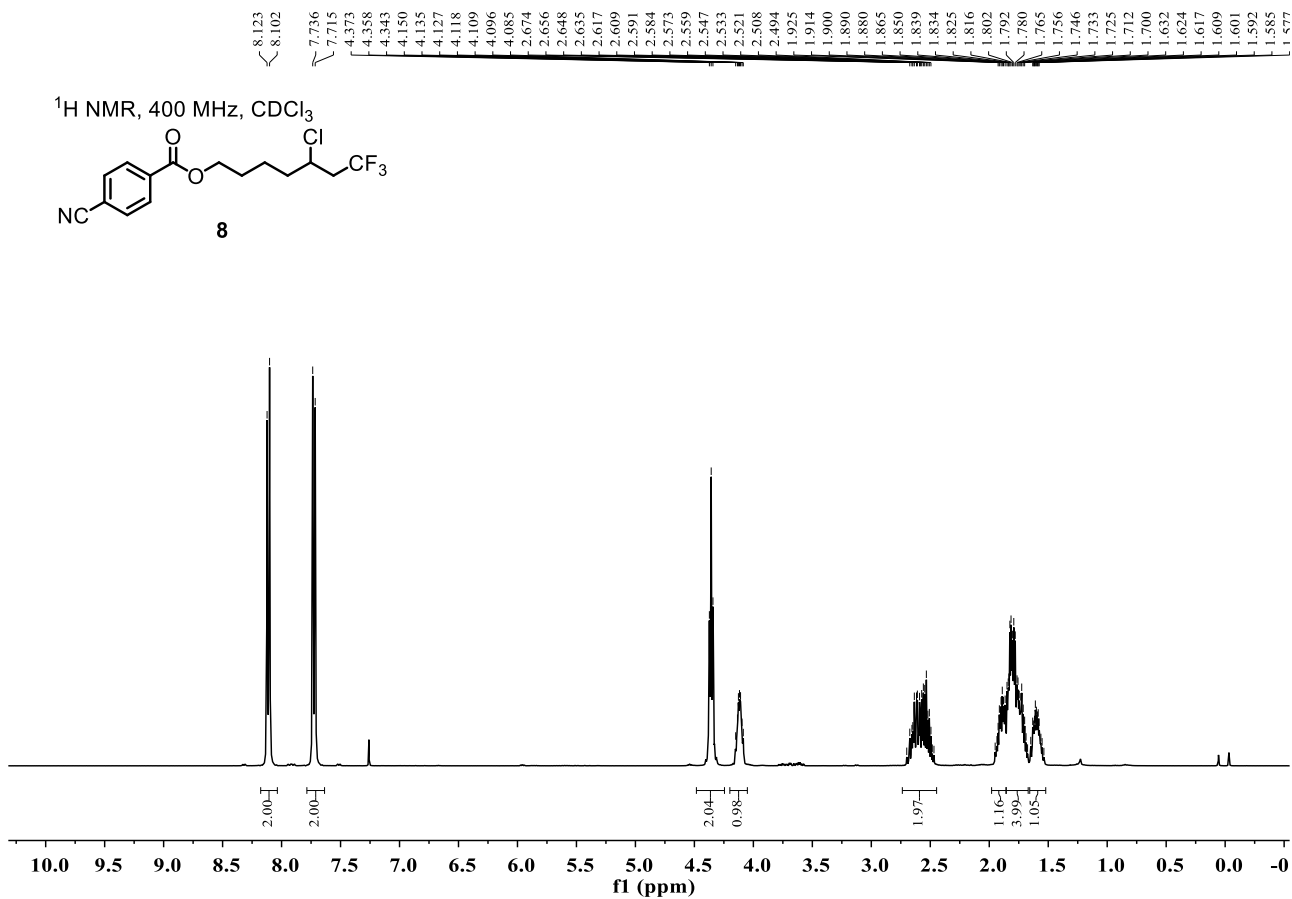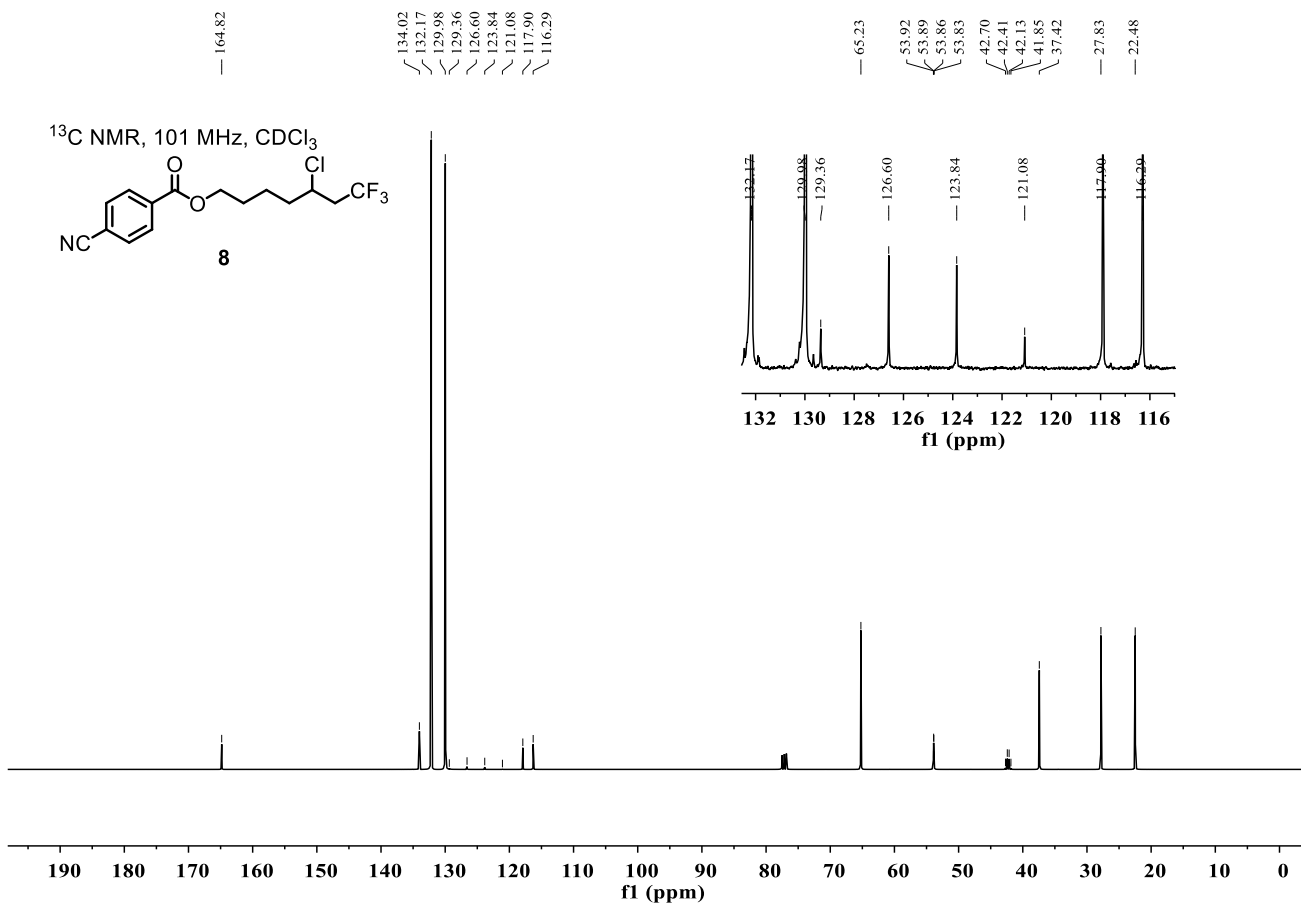

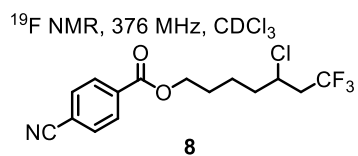

-63.75

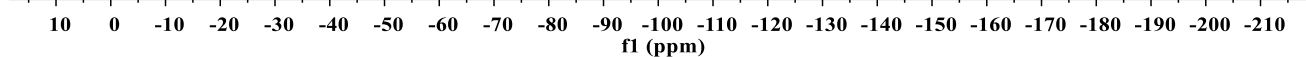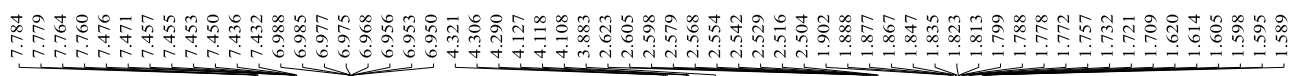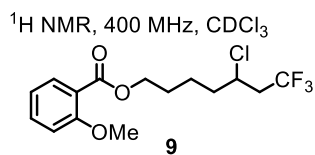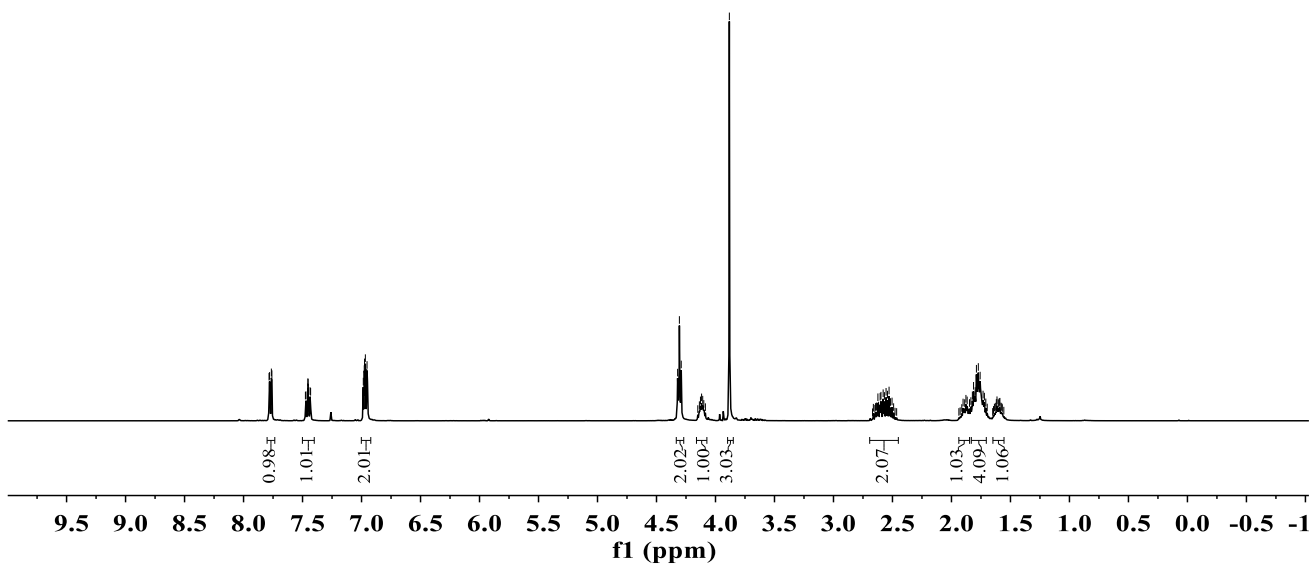

<sup>13</sup>C NMR, 101 MHz, CDCl<sub>3</sub>

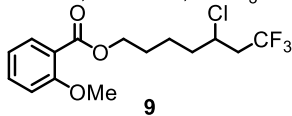

— 166.337 —  
— 159.182 —  
— 133.534 —  
— 131.555 —  
— 129.456 —  
— 126.698 —  
— 123.939 —  
— 121.181 —  
— 120.502 —  
— 120.172 —  
— 112.092 —

— 64.337 —  
— 55.968 —  
— 54.073 —  
— 54.042 —  
— 54.010 —  
— 53.978 —  
— 42.874 —  
— 42.591 —  
— 42.309 —  
— 42.026 —  
— 37.663 —  
— 28.072 —  
— 22.693 —

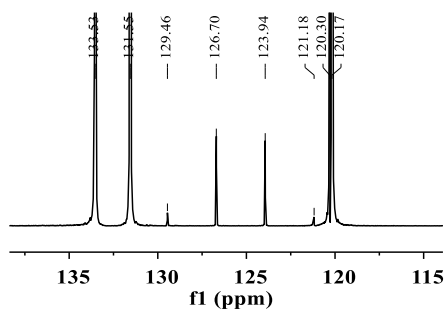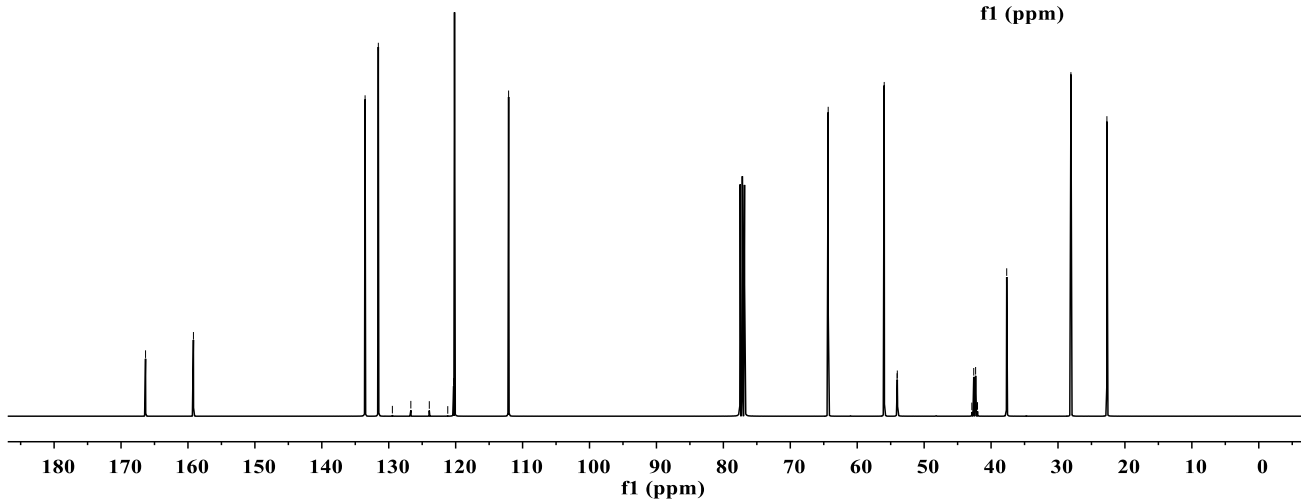

<sup>19</sup>F NMR, 376 MHz, CDCl<sub>3</sub>

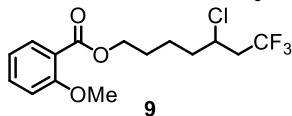

— -63.79 —

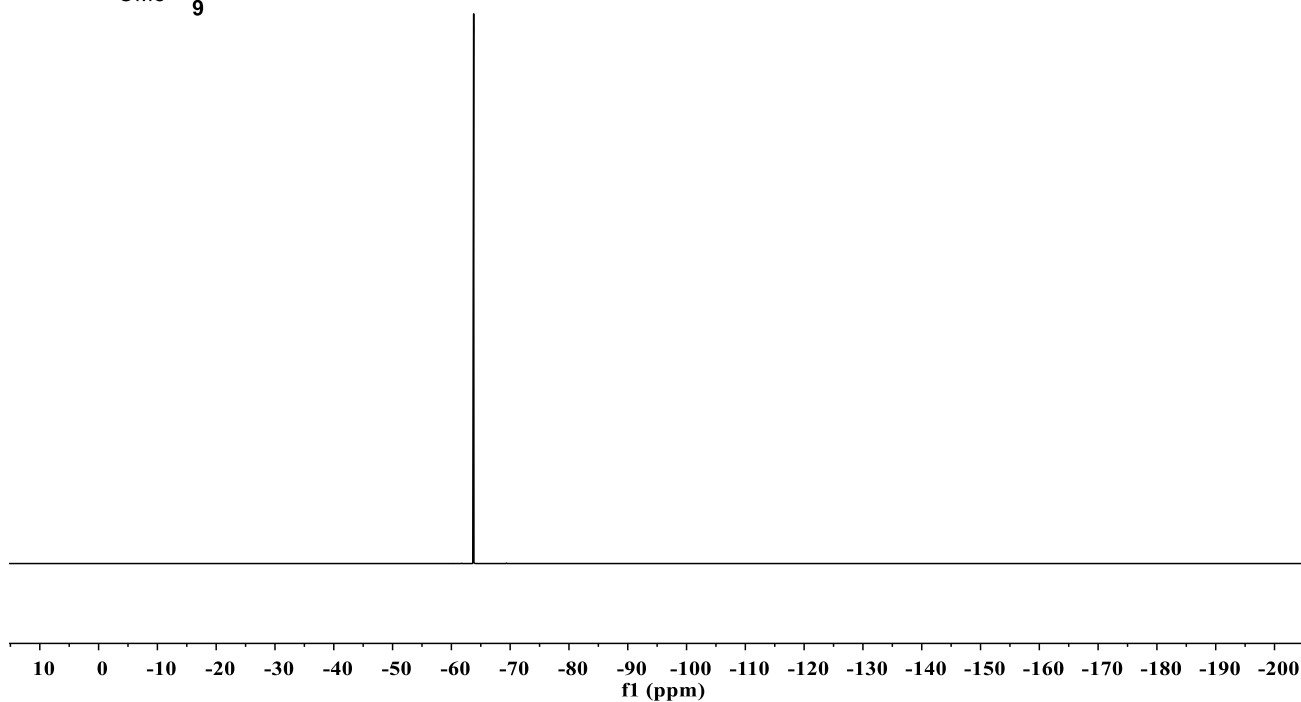

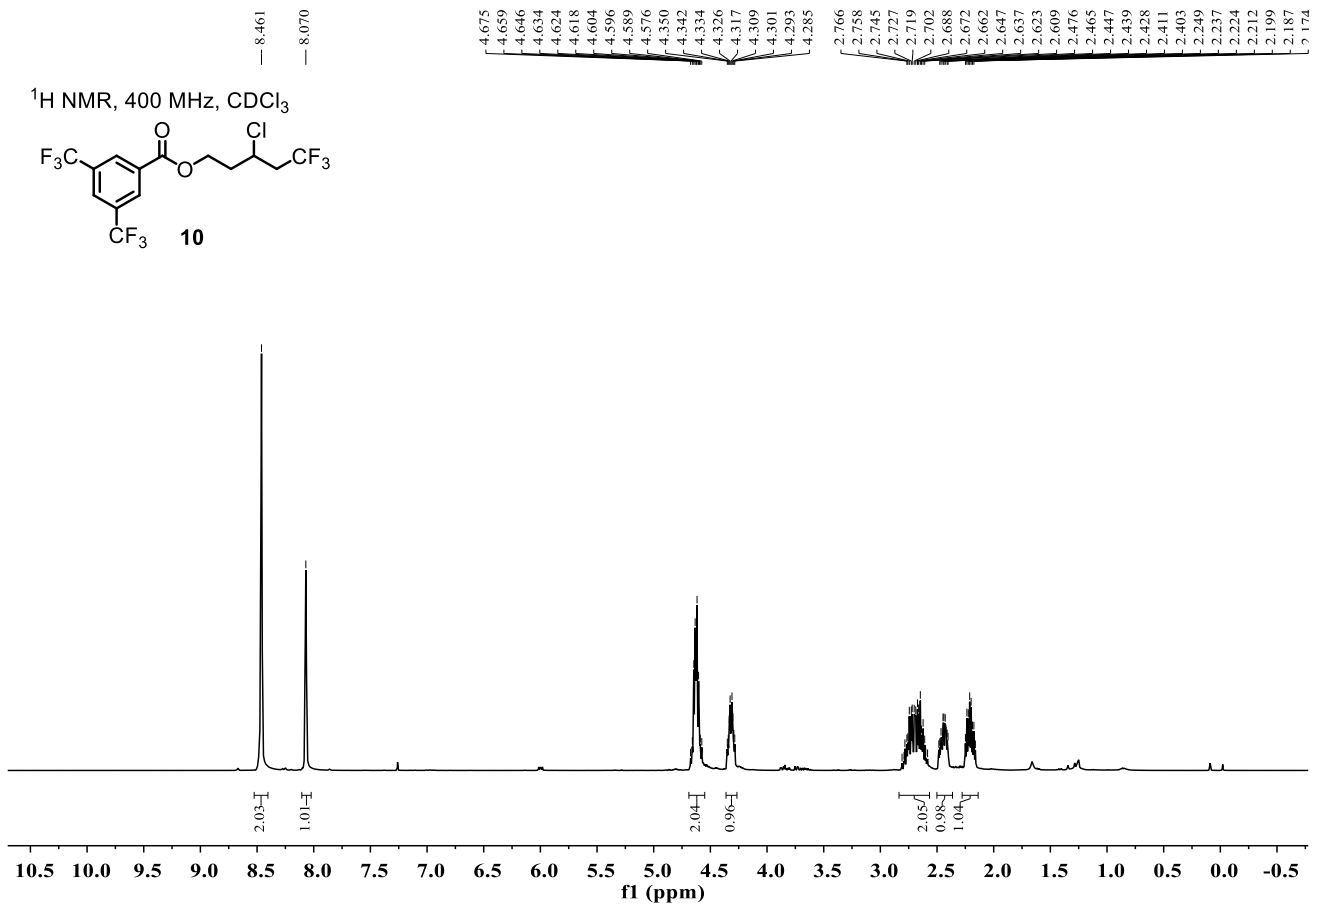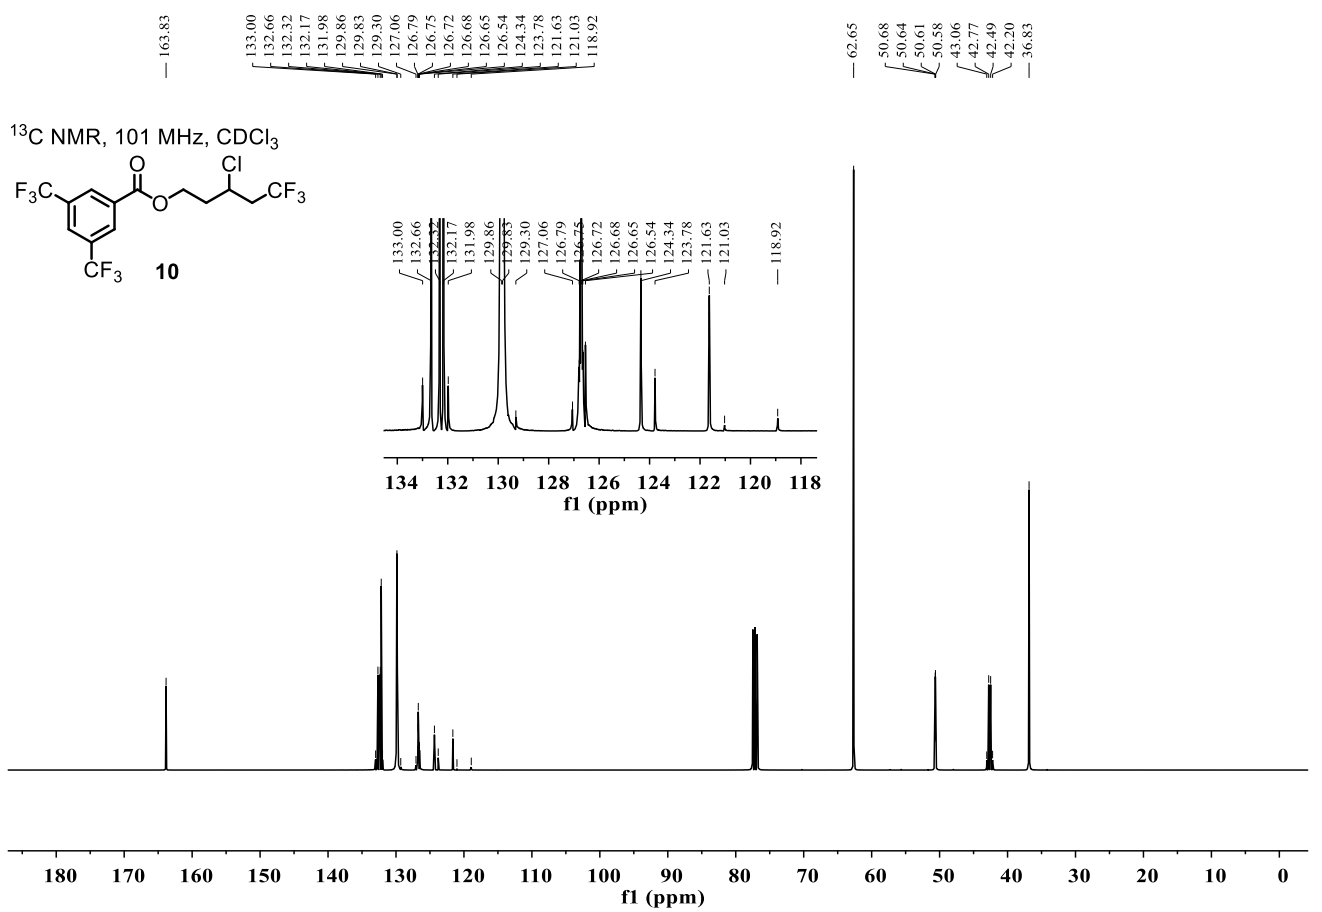

<sup>19</sup>F NMR, 376 MHz, CDCl<sub>3</sub>

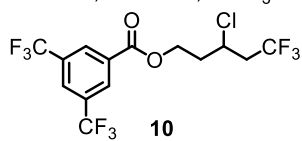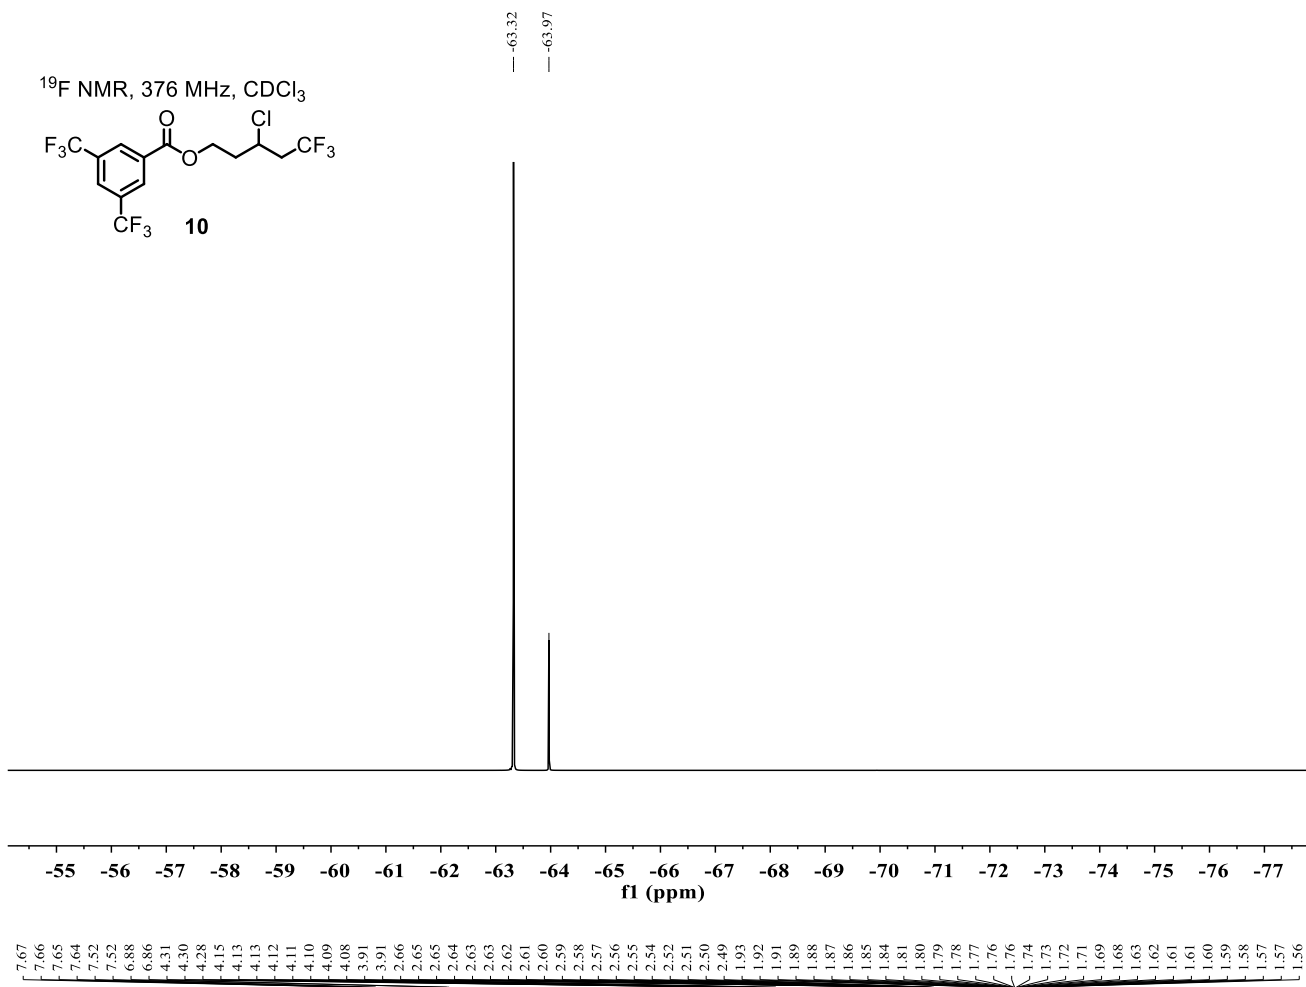

<sup>1</sup>H NMR, 400 MHz, CDCl<sub>3</sub>

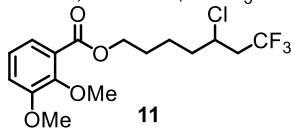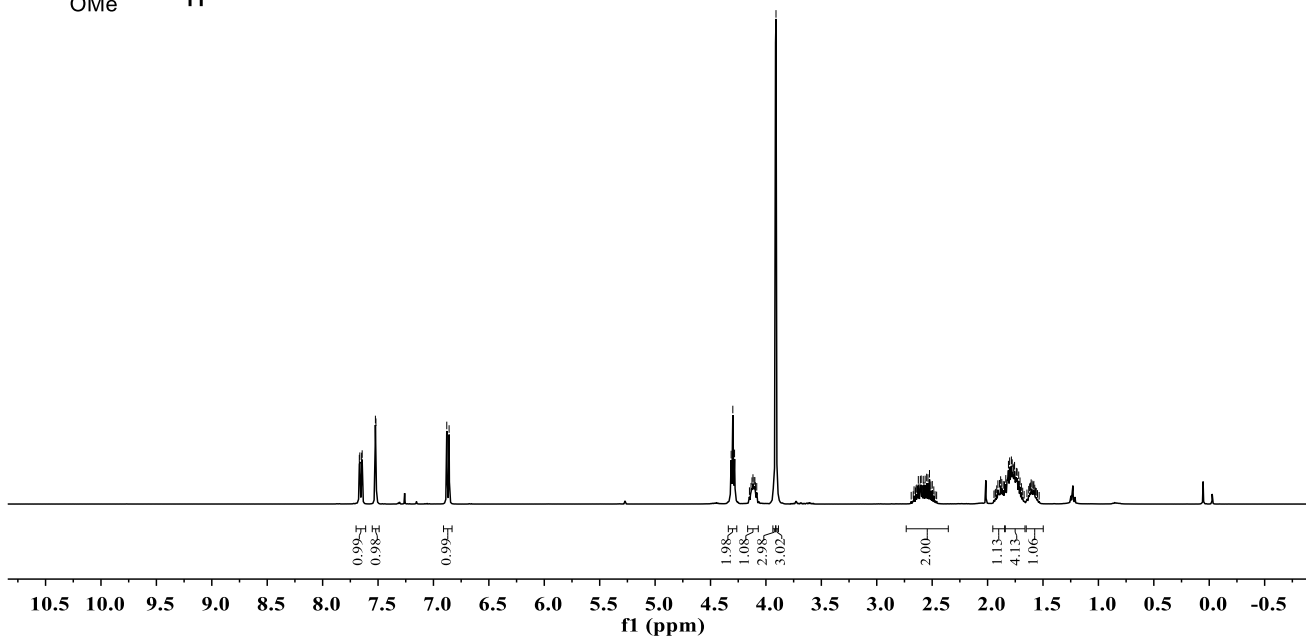

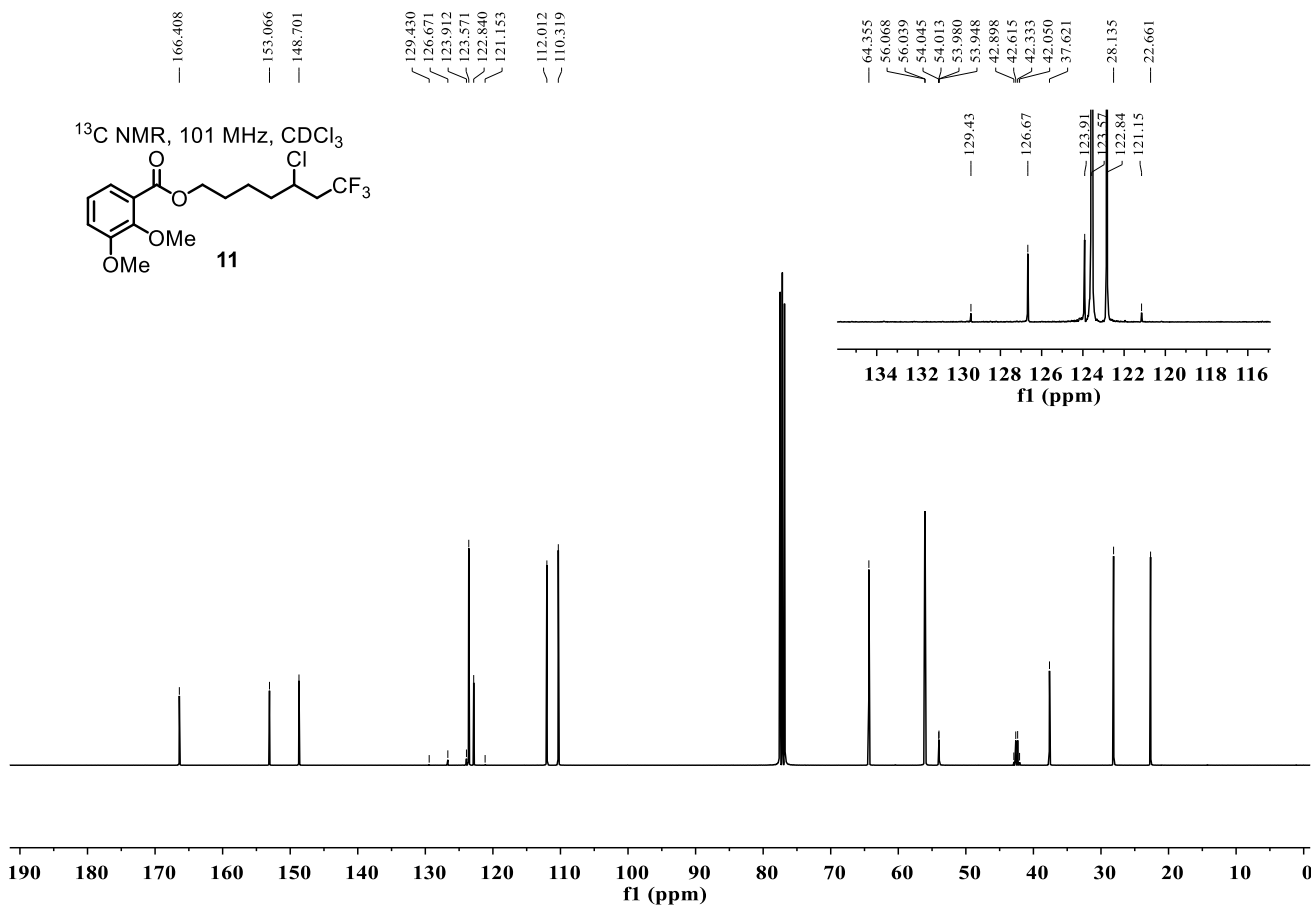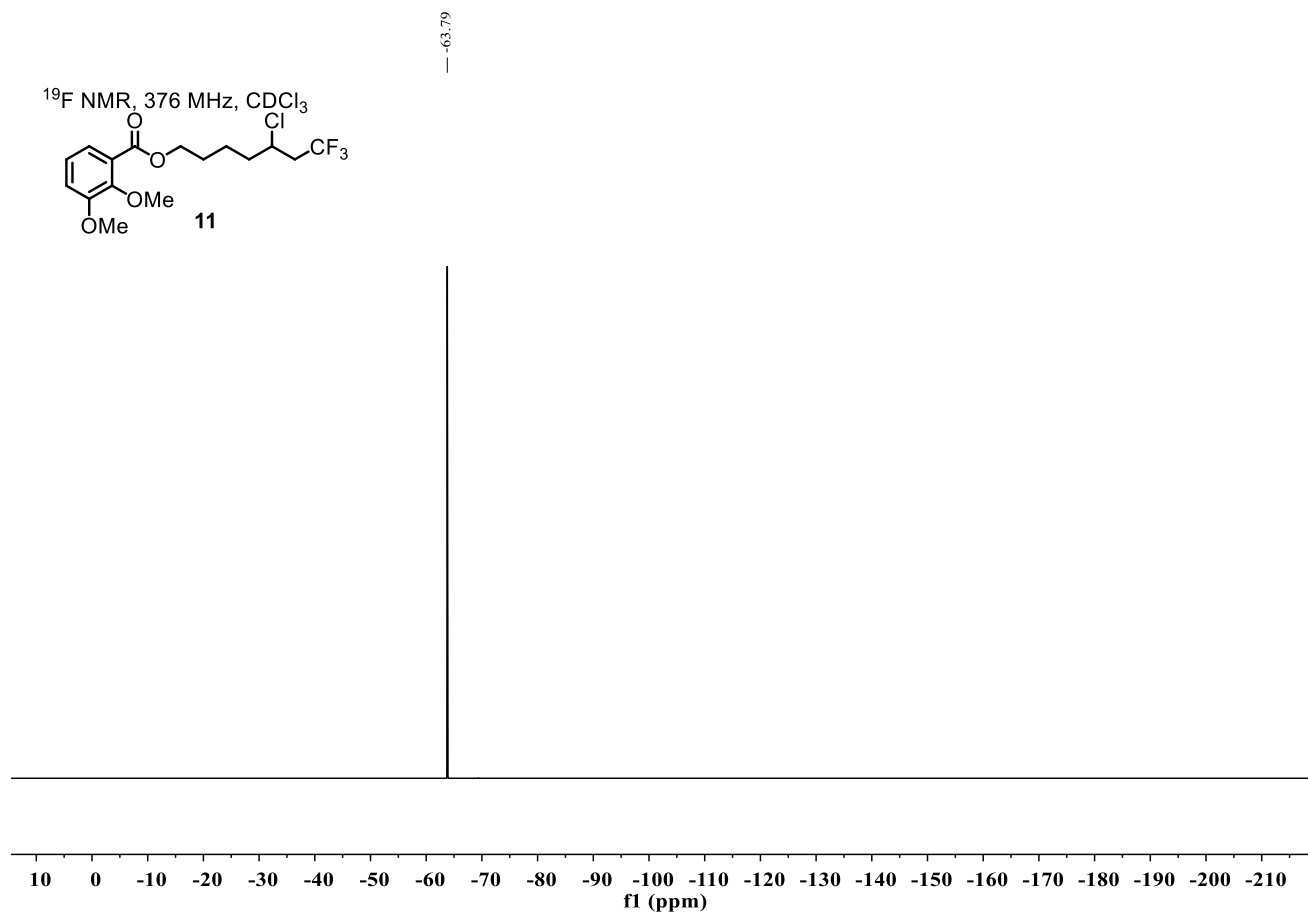





<sup>19</sup>F NMR, 376 MHz, CDCl<sub>3</sub>

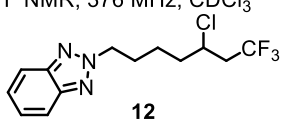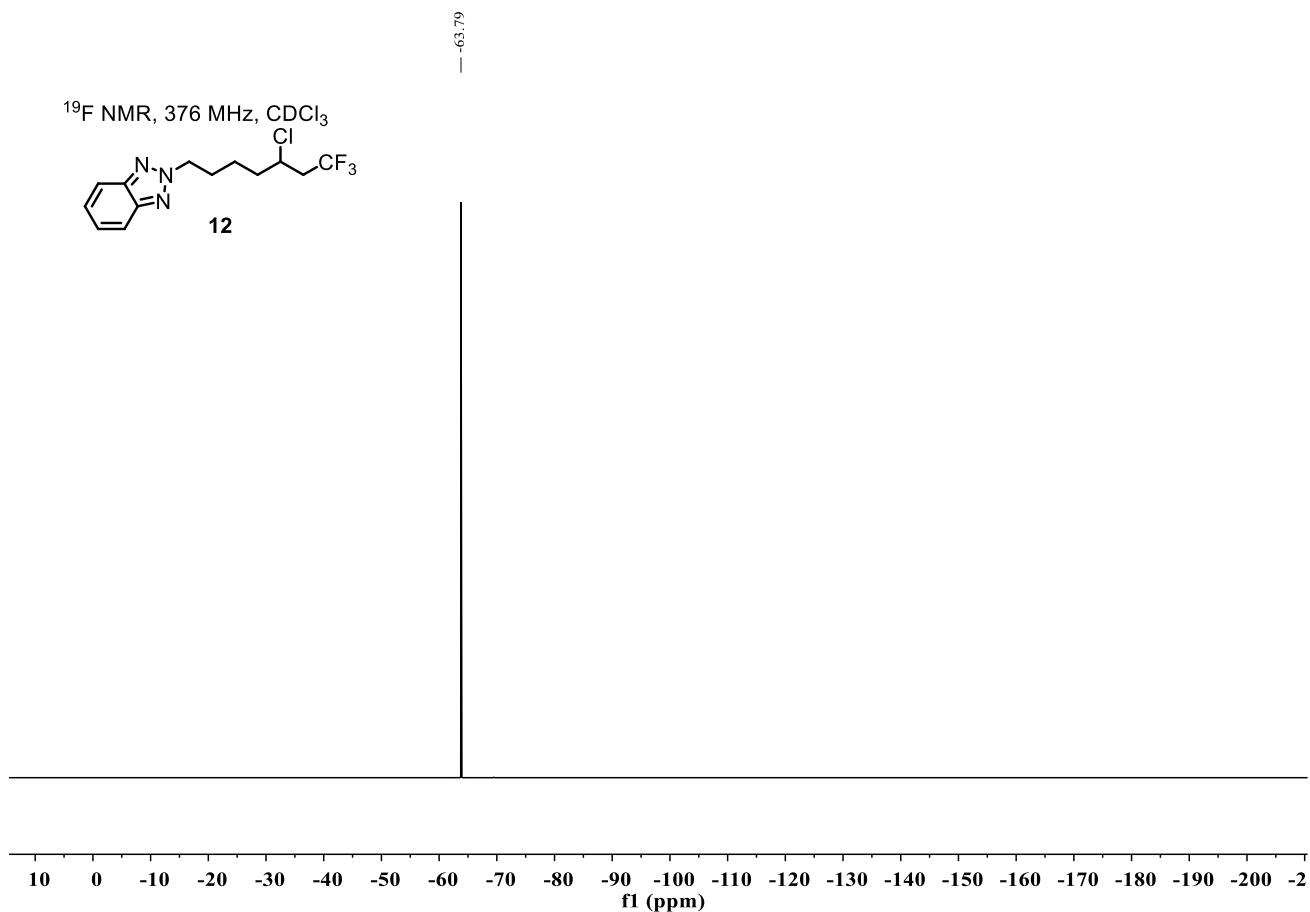

8.489  
8.010  
7.988  
7.971  
7.937  
7.917  
7.870  
7.849  
7.698  
7.681  
7.663  
7.660  
7.655  
7.651  
7.634  
7.616

4.110  
4.094  
4.079  
4.038  
4.025  
4.016  
4.006  
3.996  
3.987  
3.974

2.538  
2.519  
2.513  
2.493  
2.467  
2.453  
2.441  
2.428  
2.415  
2.402  
1.765  
1.741  
1.730  
1.690  
1.675  
1.662  
1.640  
1.629  
1.607  
1.583  
1.571  
1.559  
1.488  
1.472  
1.464  
1.457  
1.448  
1.433

<sup>1</sup>H NMR, 400 MHz, CDCl<sub>3</sub>

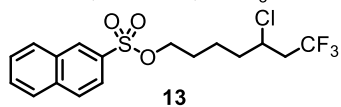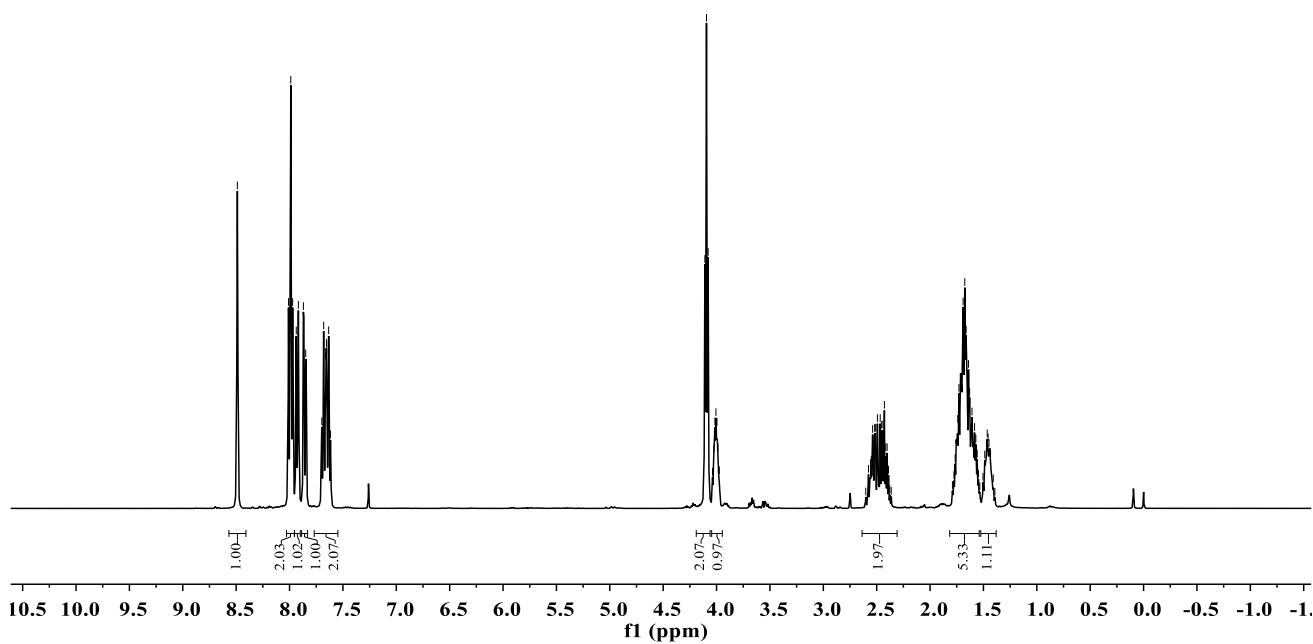

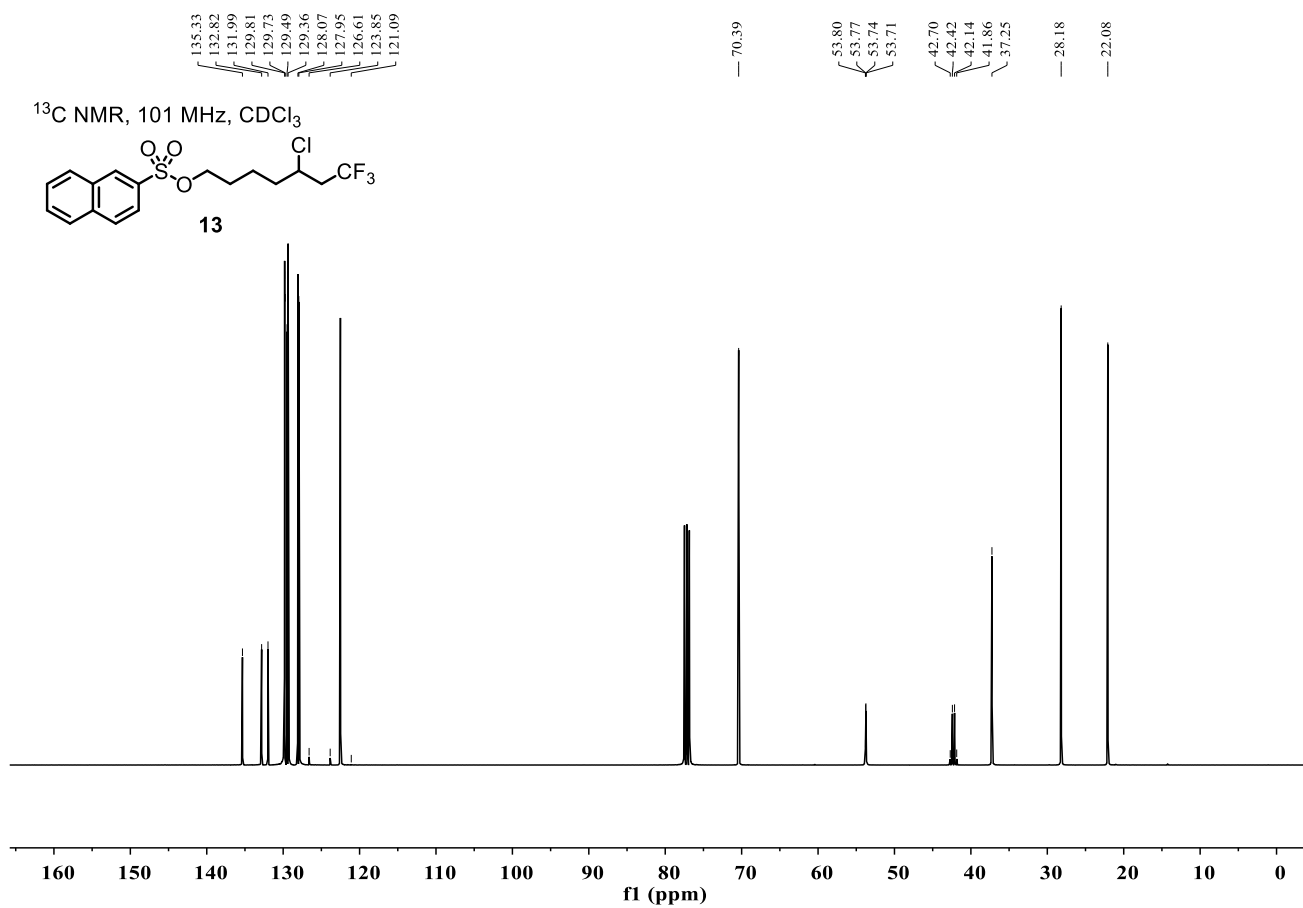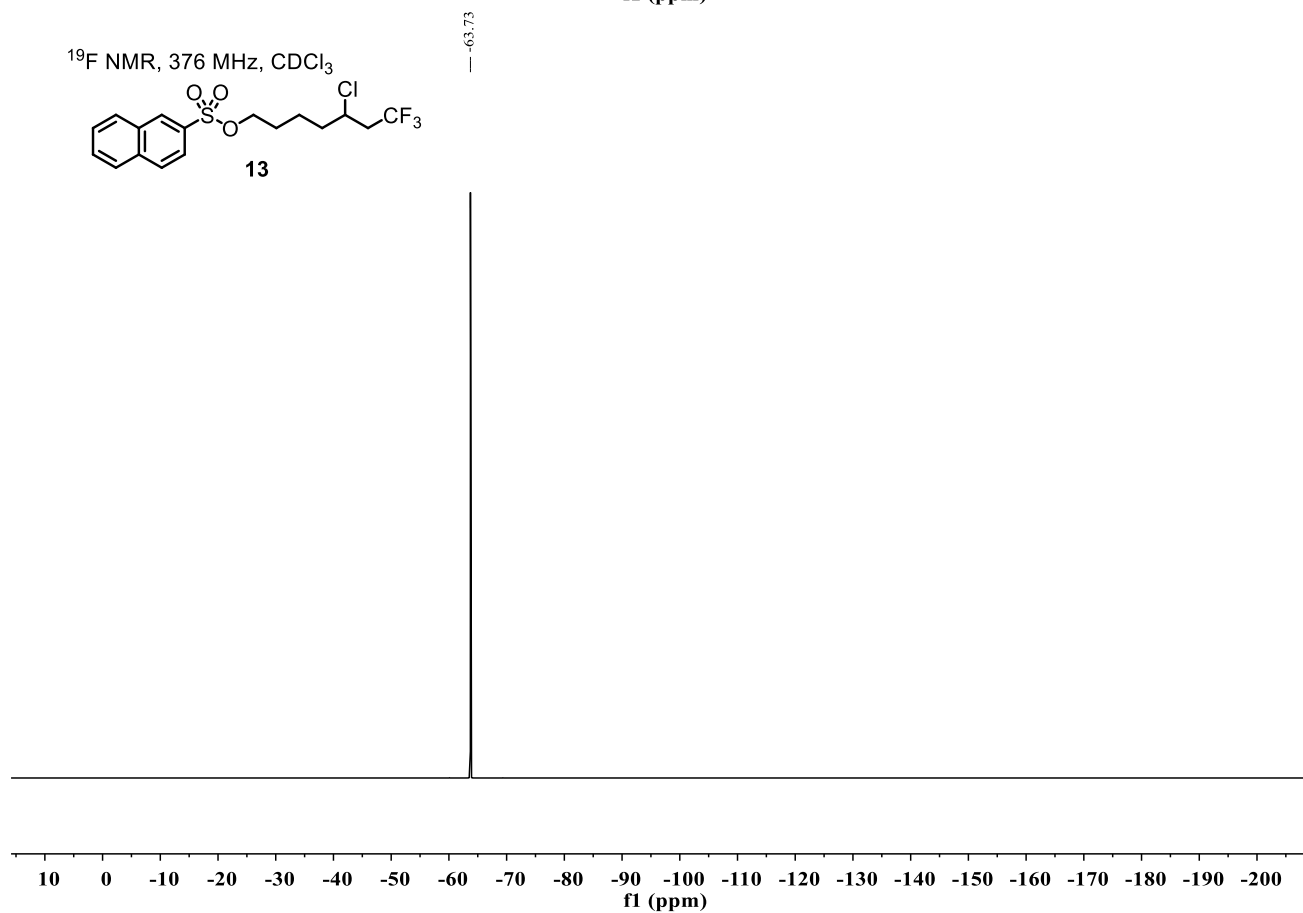

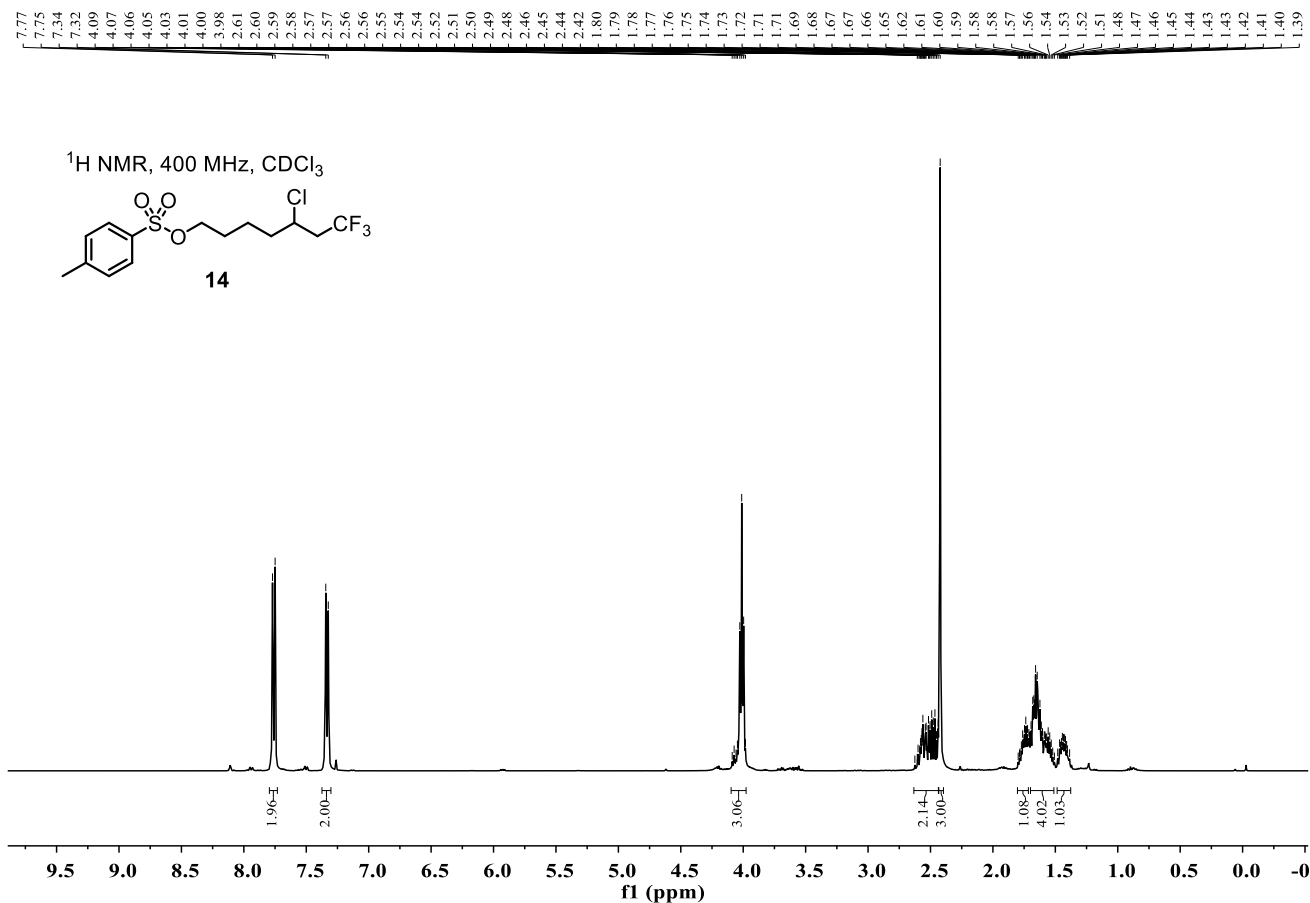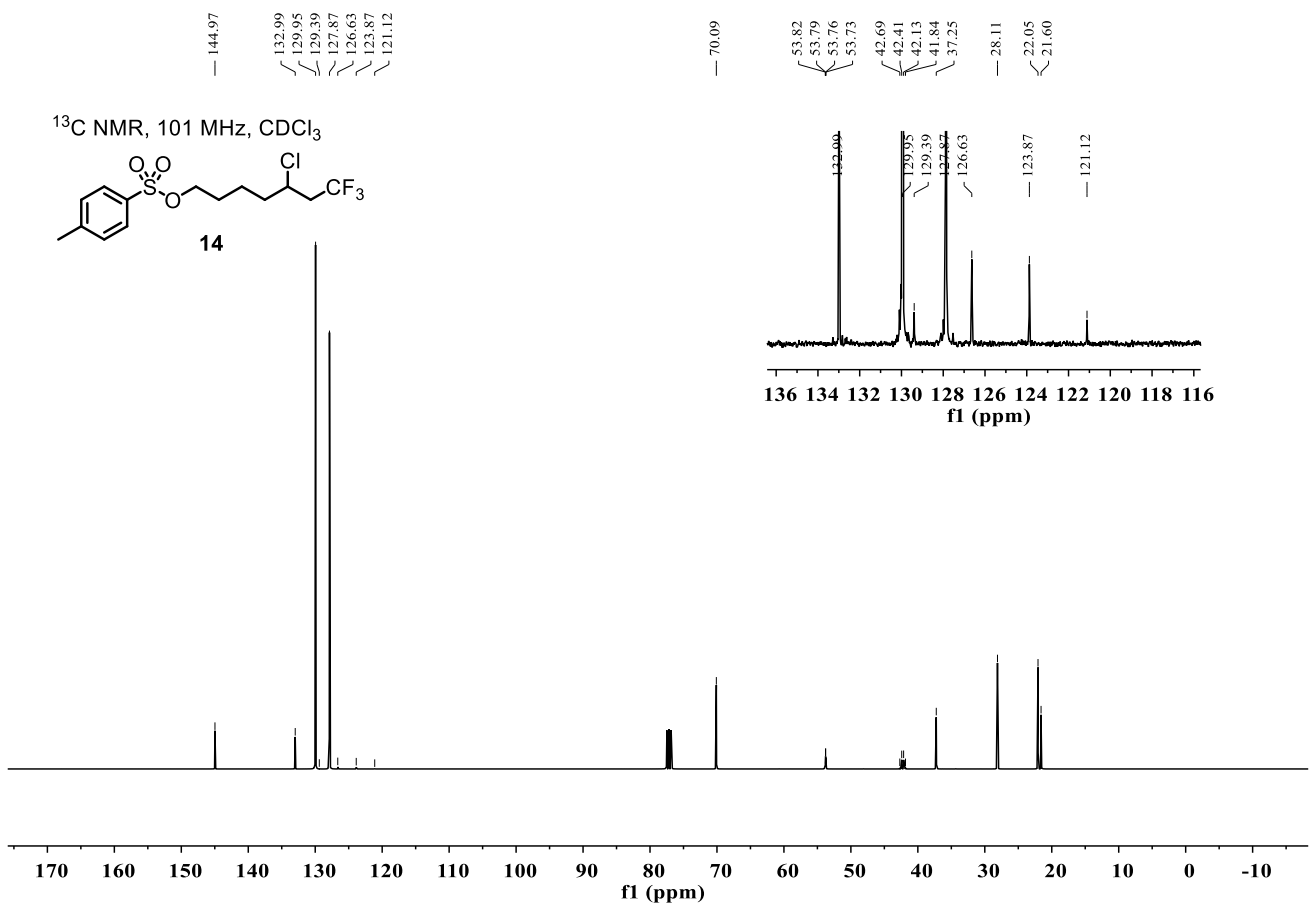

<sup>19</sup>F NMR, 376 MHz, CDCl<sub>3</sub>

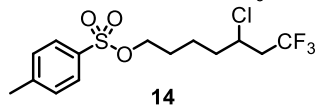

-63.79

10 0 -10 -20 -30 -40 -50 -60 -70 -80 -90 -100 -110 -120 -130 -140 -150 -160 -170 -180 -190 -200  
f1 (ppm)

7.11 7.09 6.83 6.81  
4.48 4.48 4.47 4.46 4.45 4.44 4.43 4.43 4.42 4.20 4.19 4.18 4.17 4.16 4.14 4.13 4.12 4.11  
2.73 2.72 2.72 2.71 2.71 2.70 2.69 2.68 2.68 2.66 2.66 2.65 2.64 2.58 2.37 2.36 2.35 2.34 2.34 2.30 2.16 2.14 2.13 2.12 2.11 2.10

<sup>1</sup>H NMR, 400 MHz, CDCl<sub>3</sub>

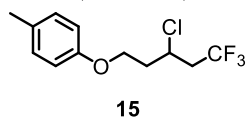

10.0 9.5 9.0 8.5 8.0 7.5 7.0 6.5 6.0 5.5 5.0 4.5 4.0 3.5 3.0 2.5 2.0 1.5 1.0 0.5 0.0 -0.5  
f1 (ppm)

1.95H 1.96H 1.00H 2.08H 2.05H 1.09H 2.93H 1.08H

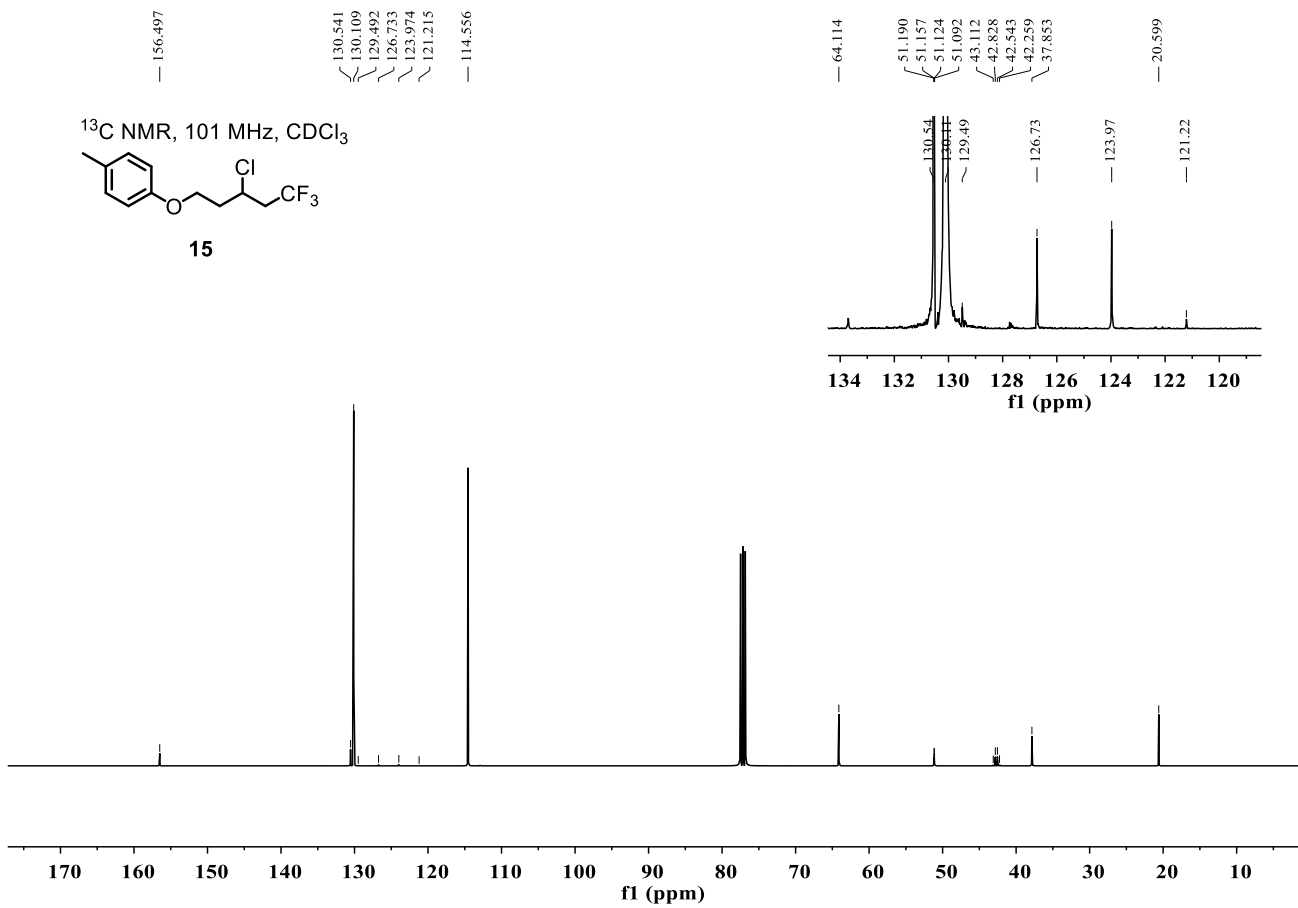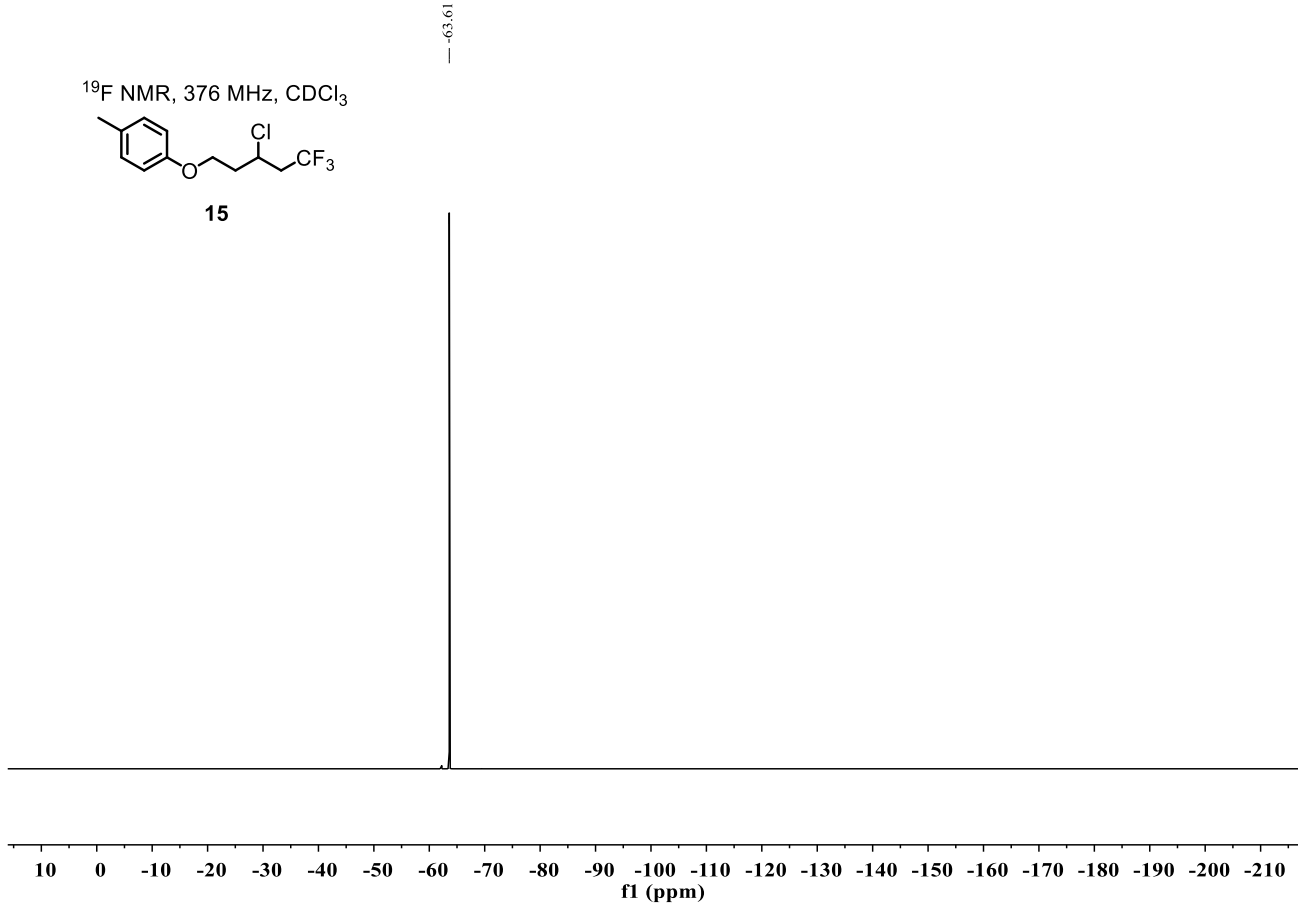

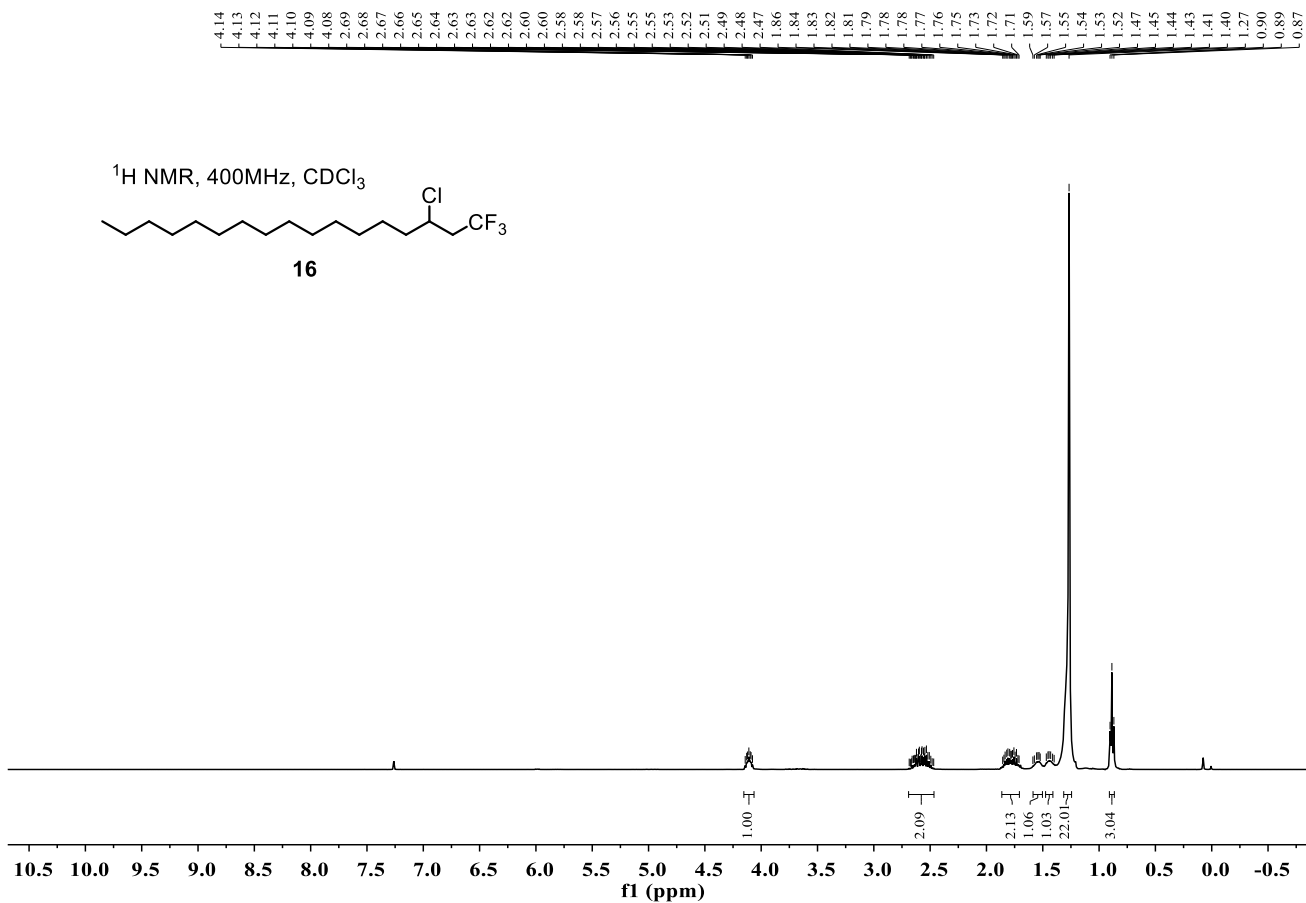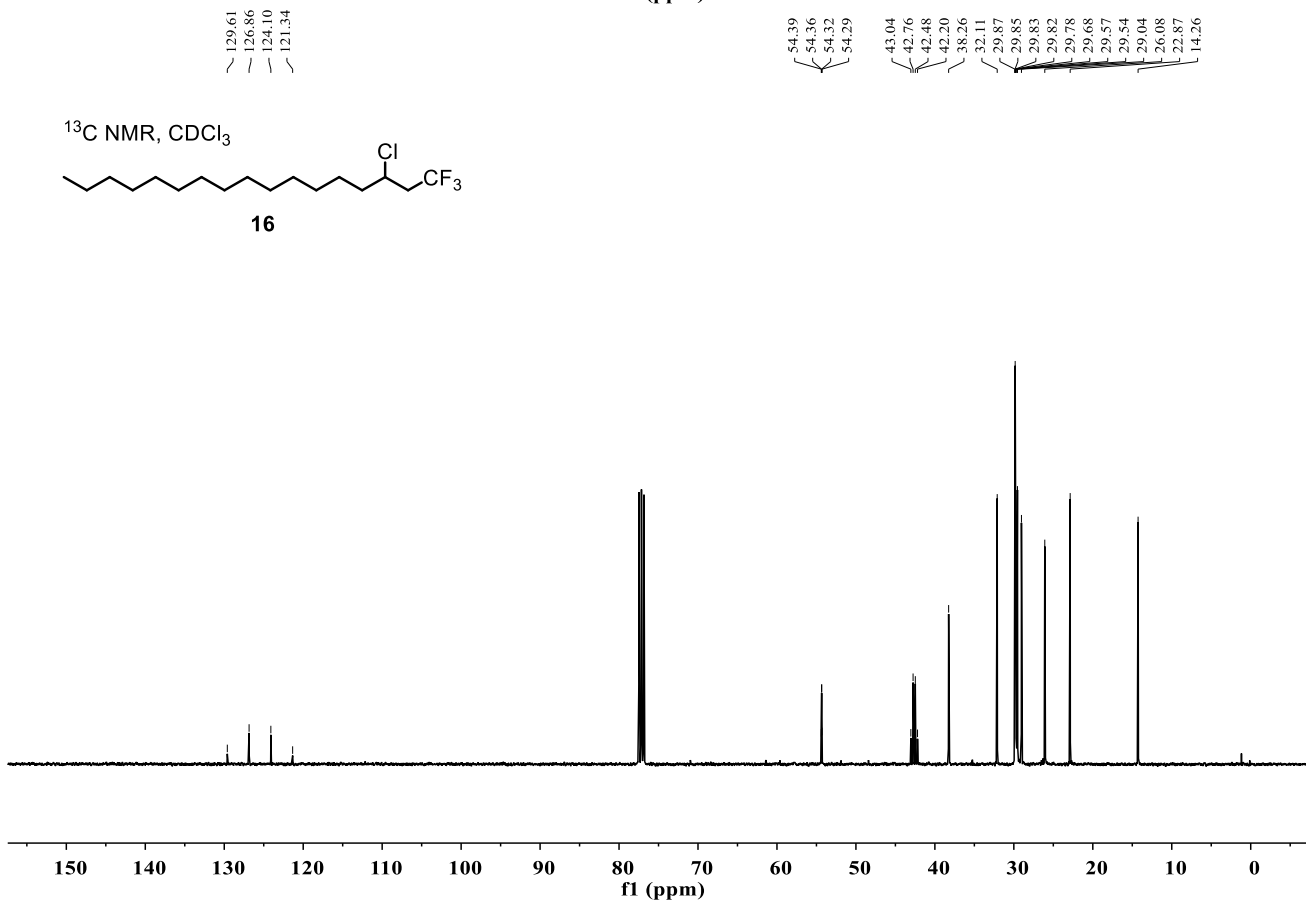

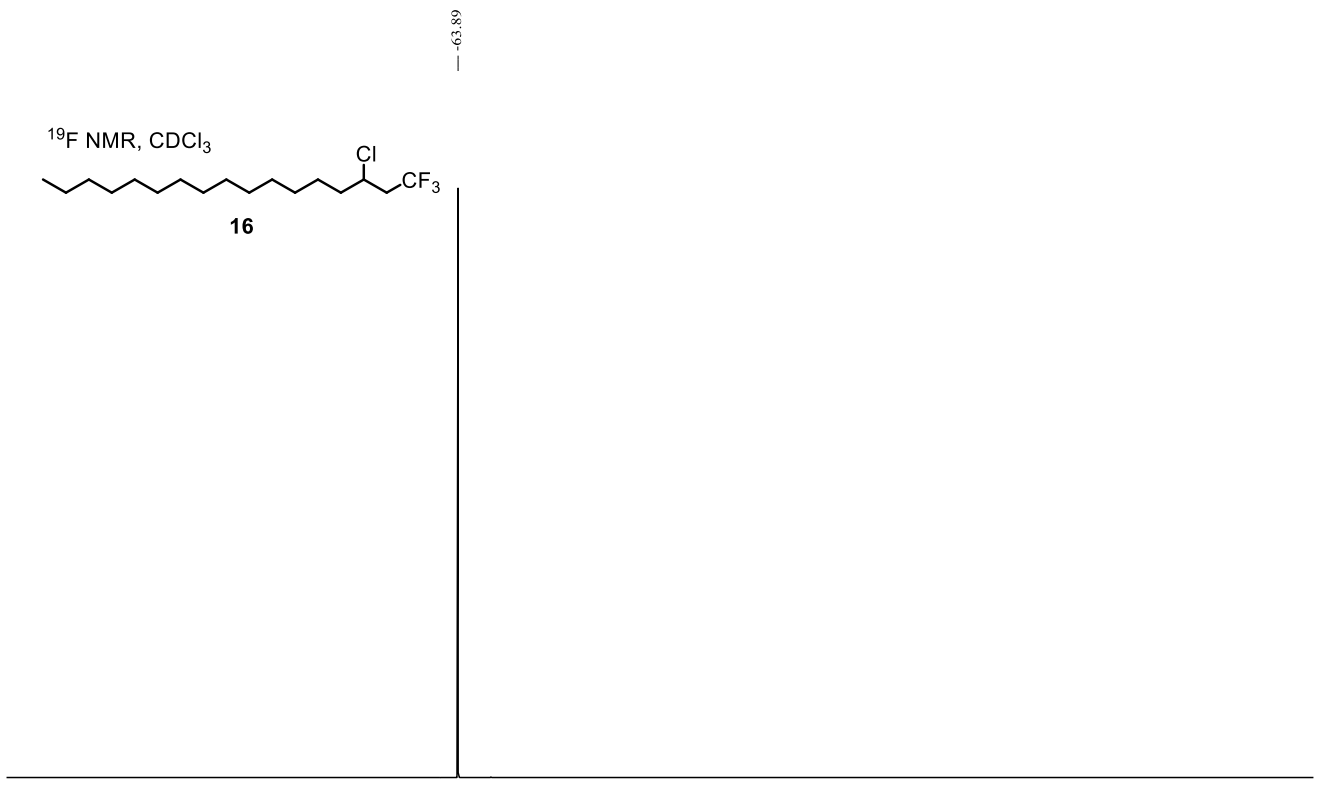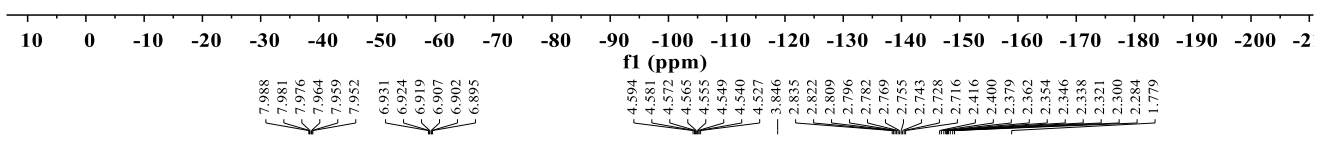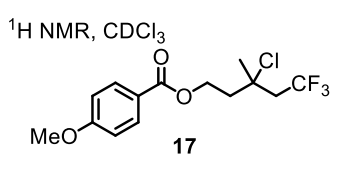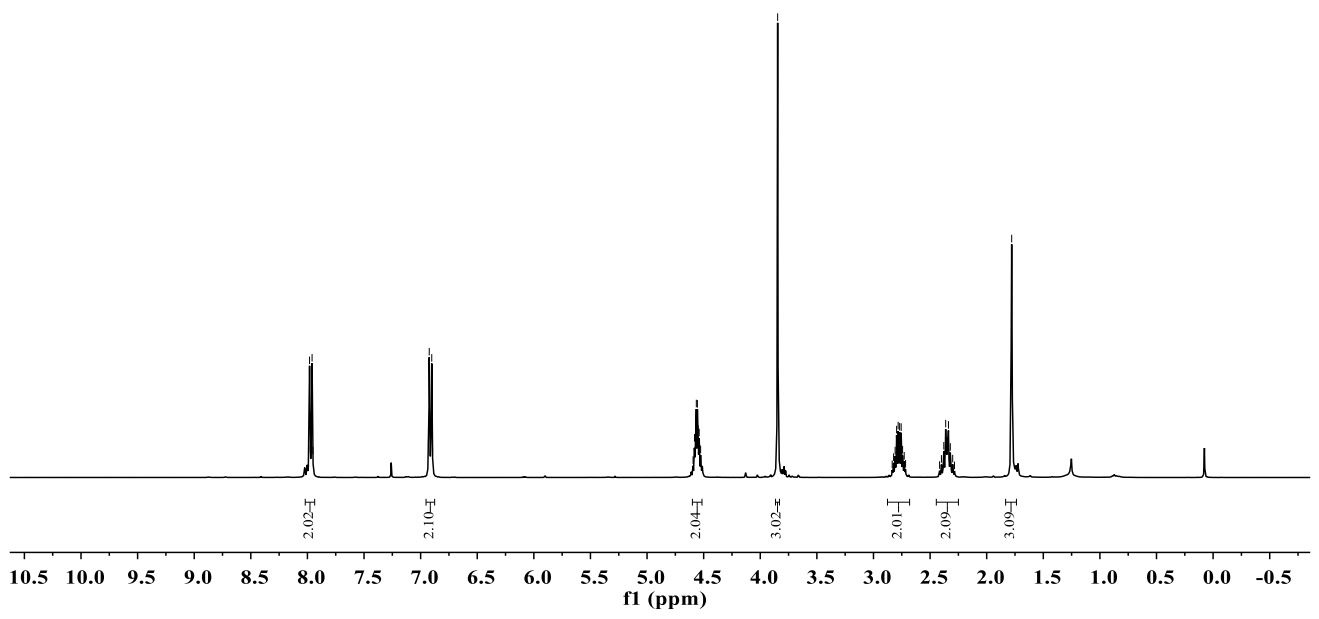



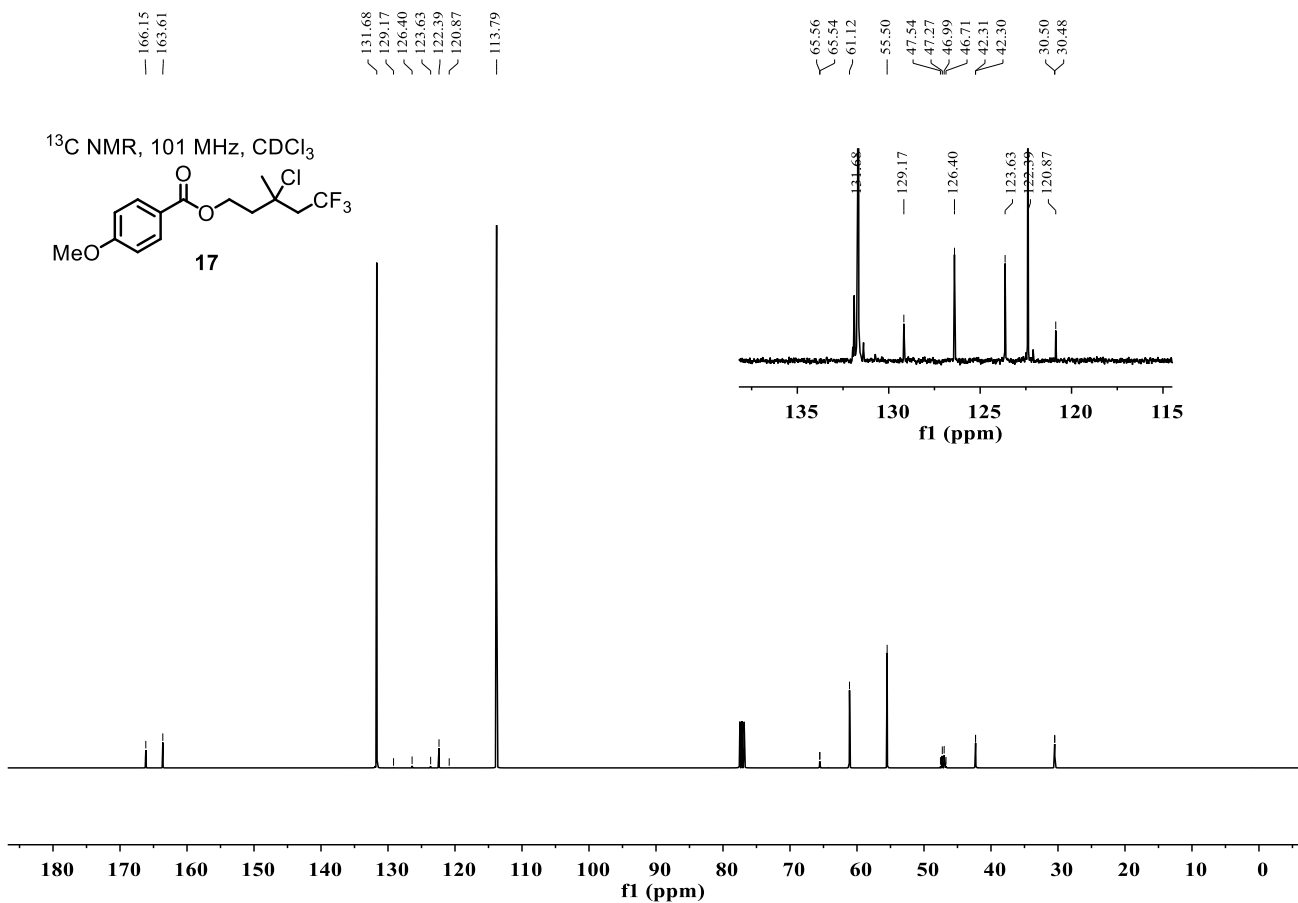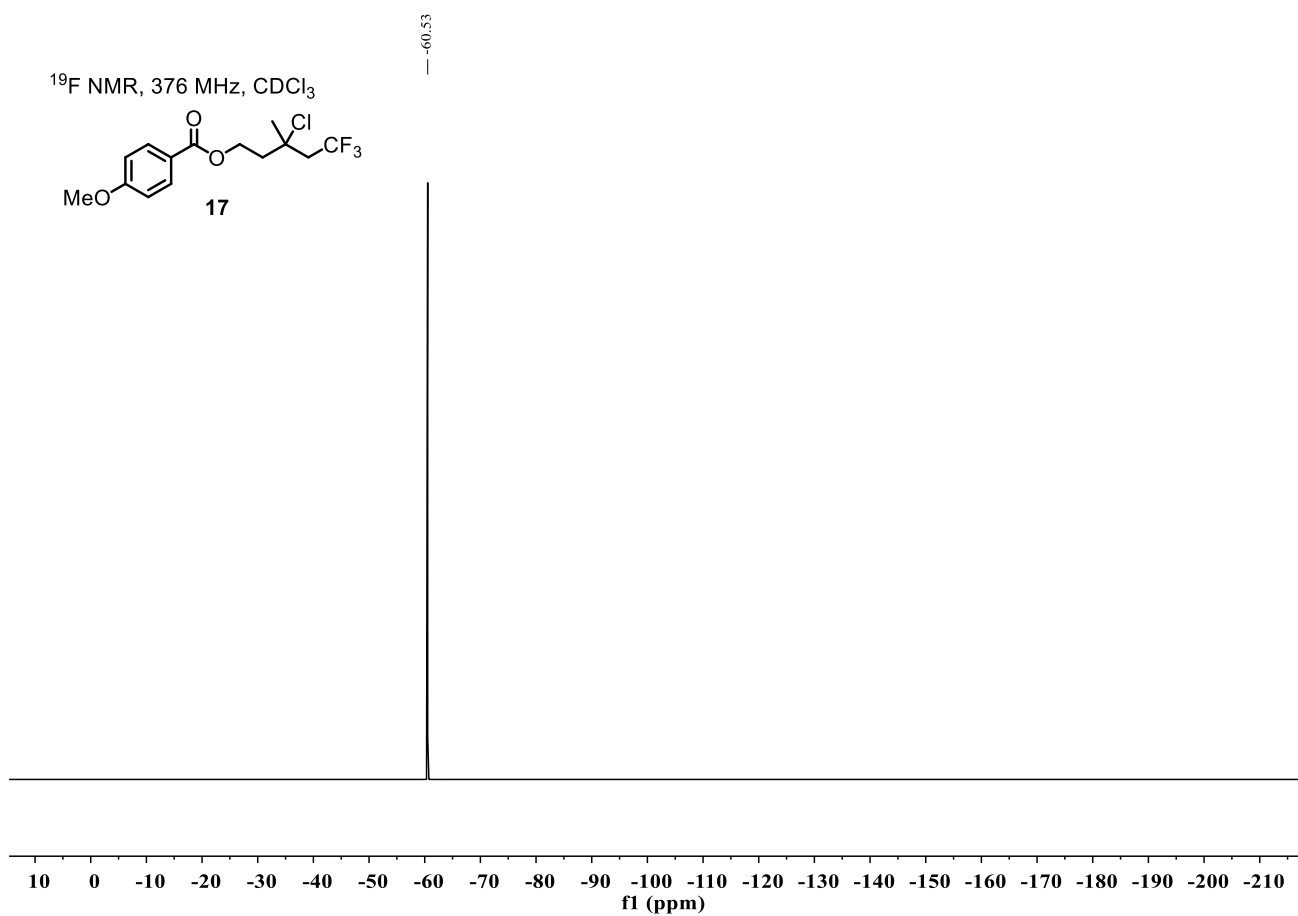

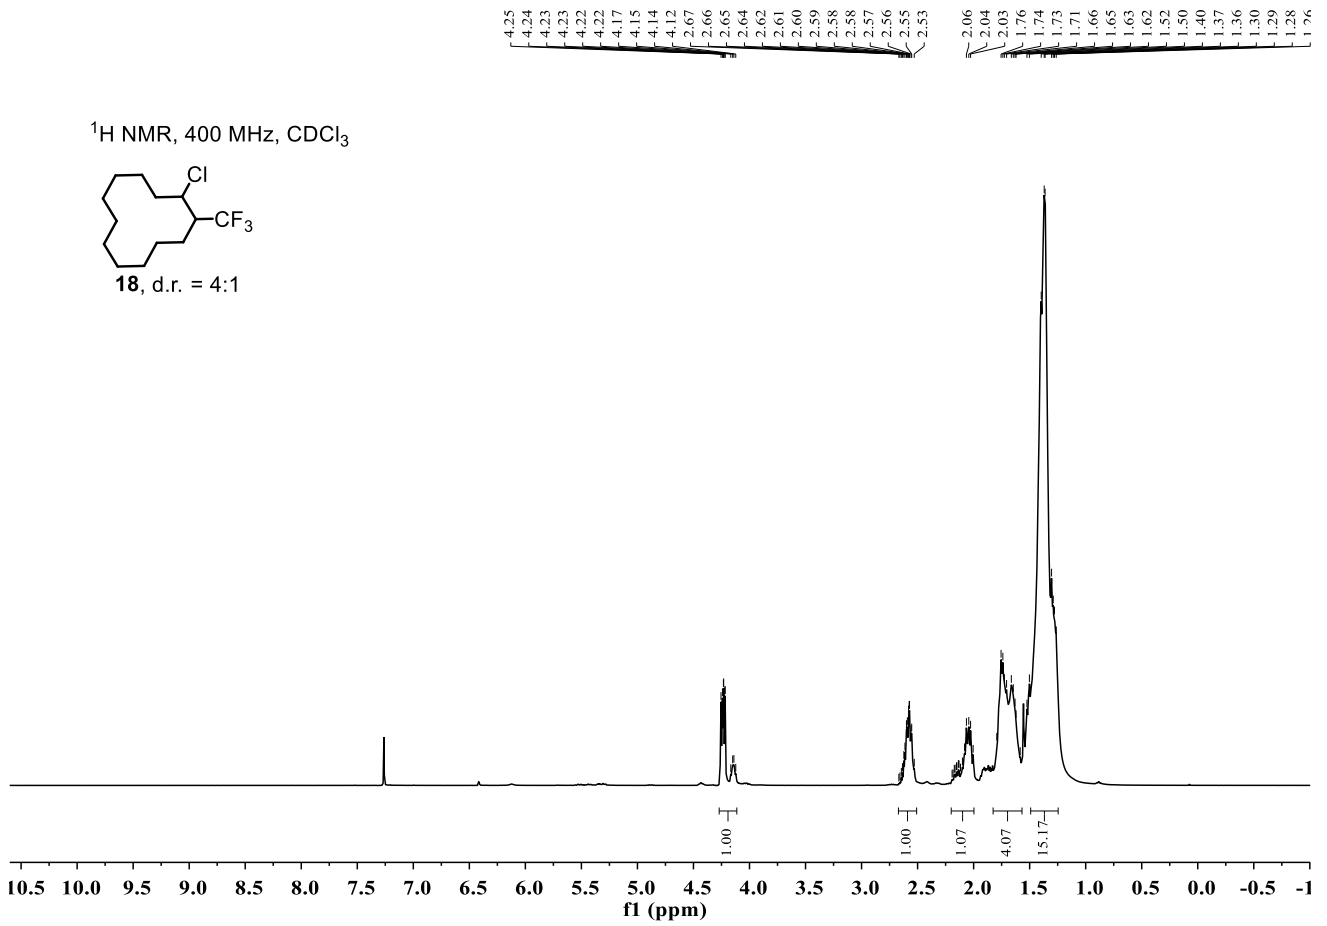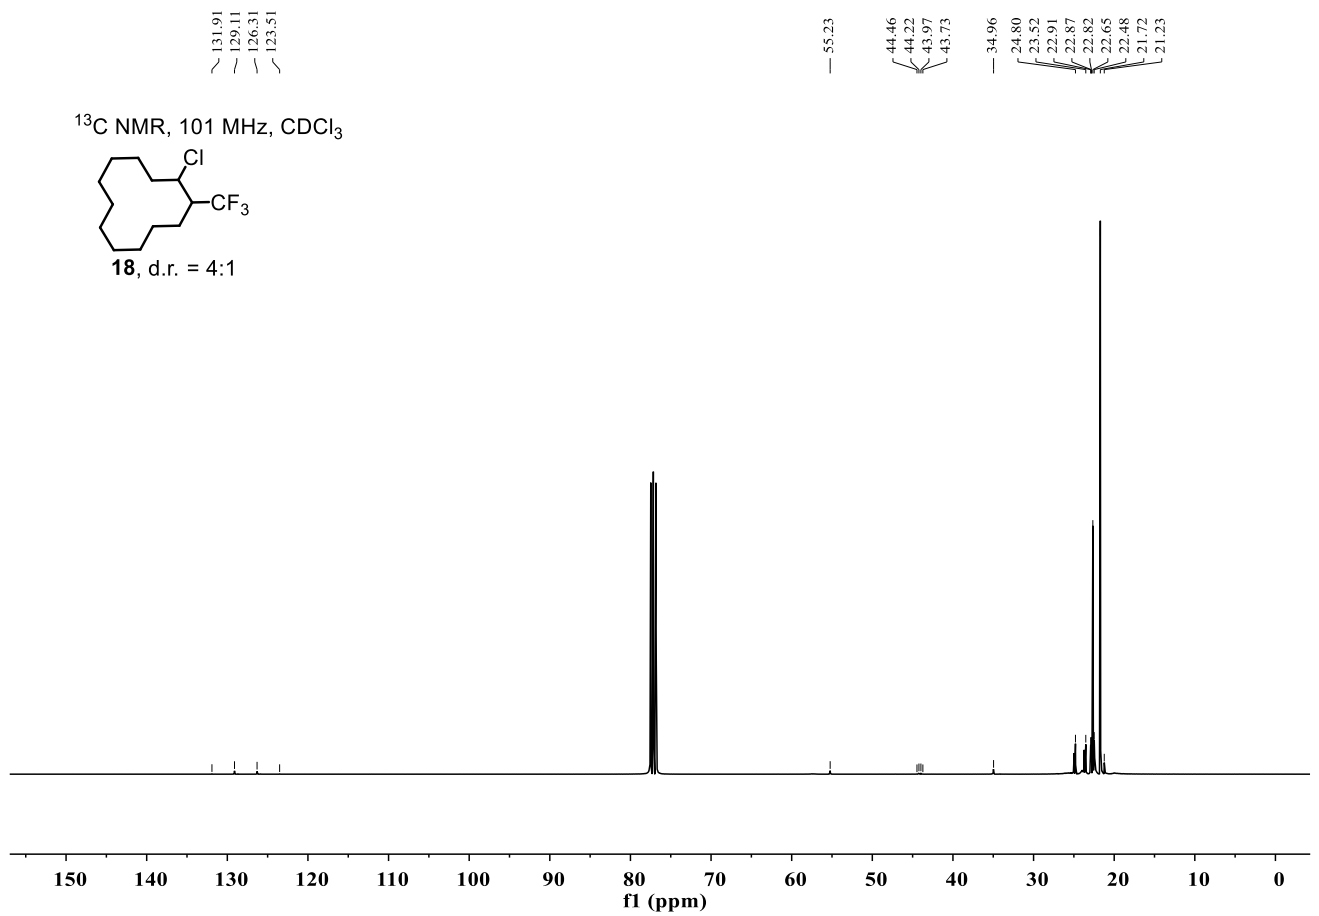

$^{19}\text{F}$  NMR, 376 MHz,  $\text{CDCl}_3$

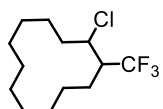

**18**, d.r. = 4:1

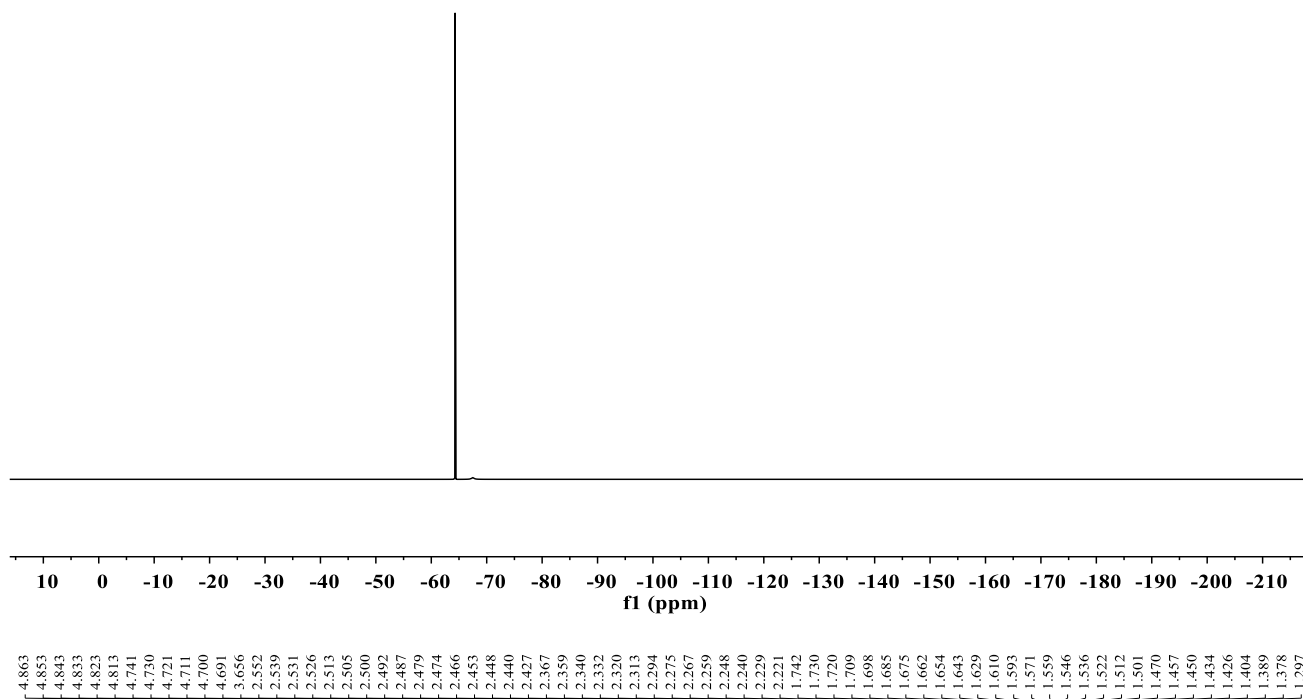

$^1\text{H}$  NMR, 400 MHz,  $\text{CDCl}_3$

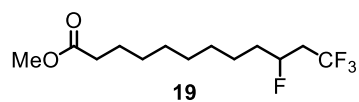

**19**

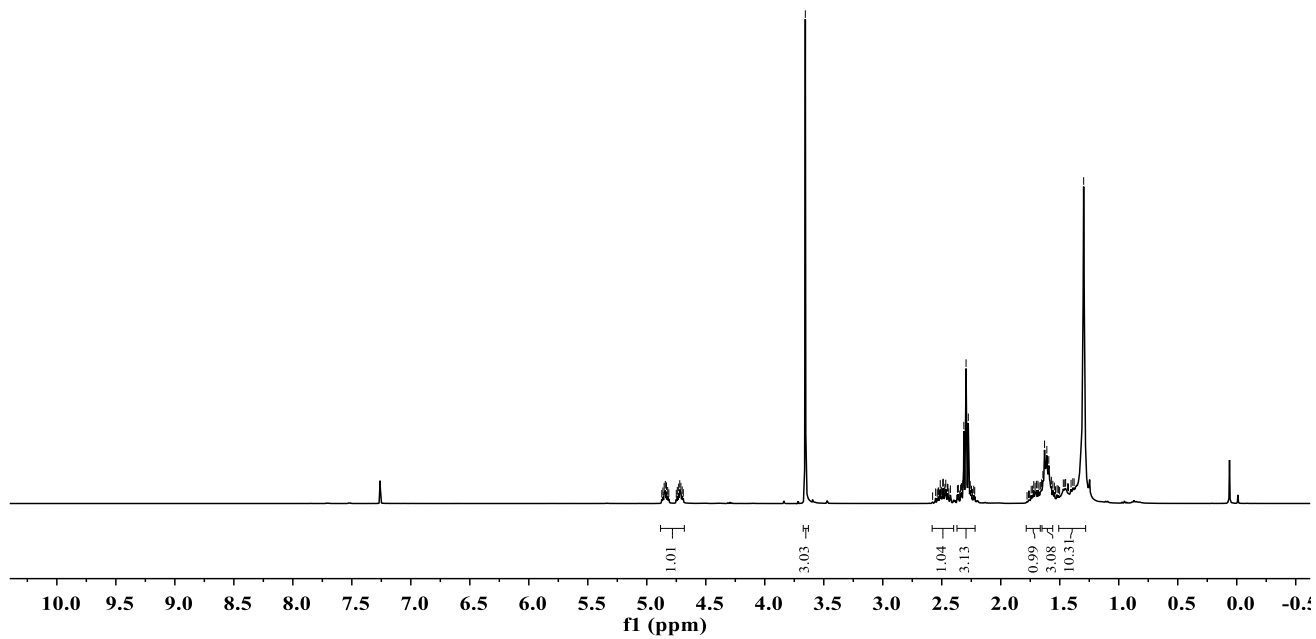

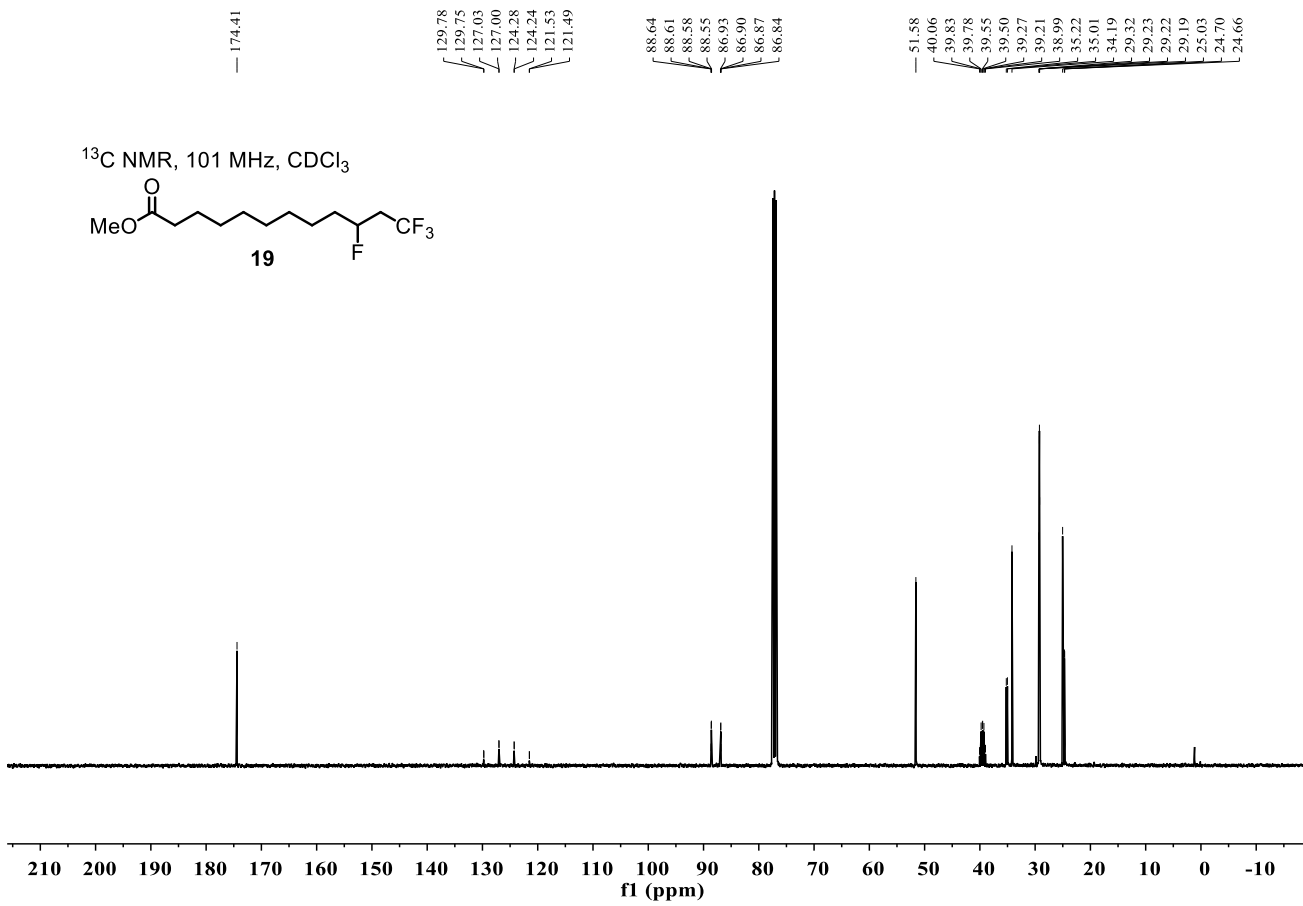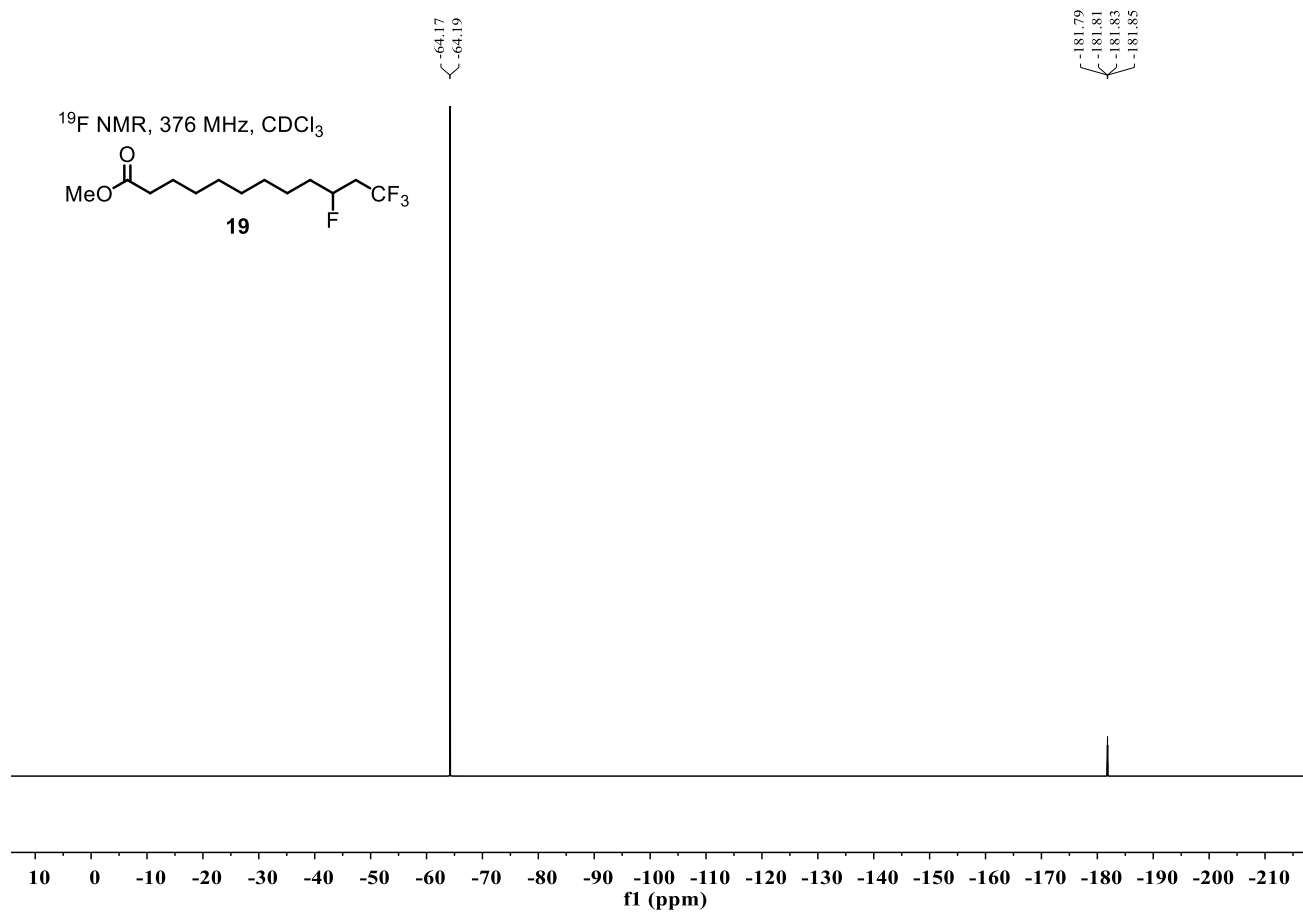

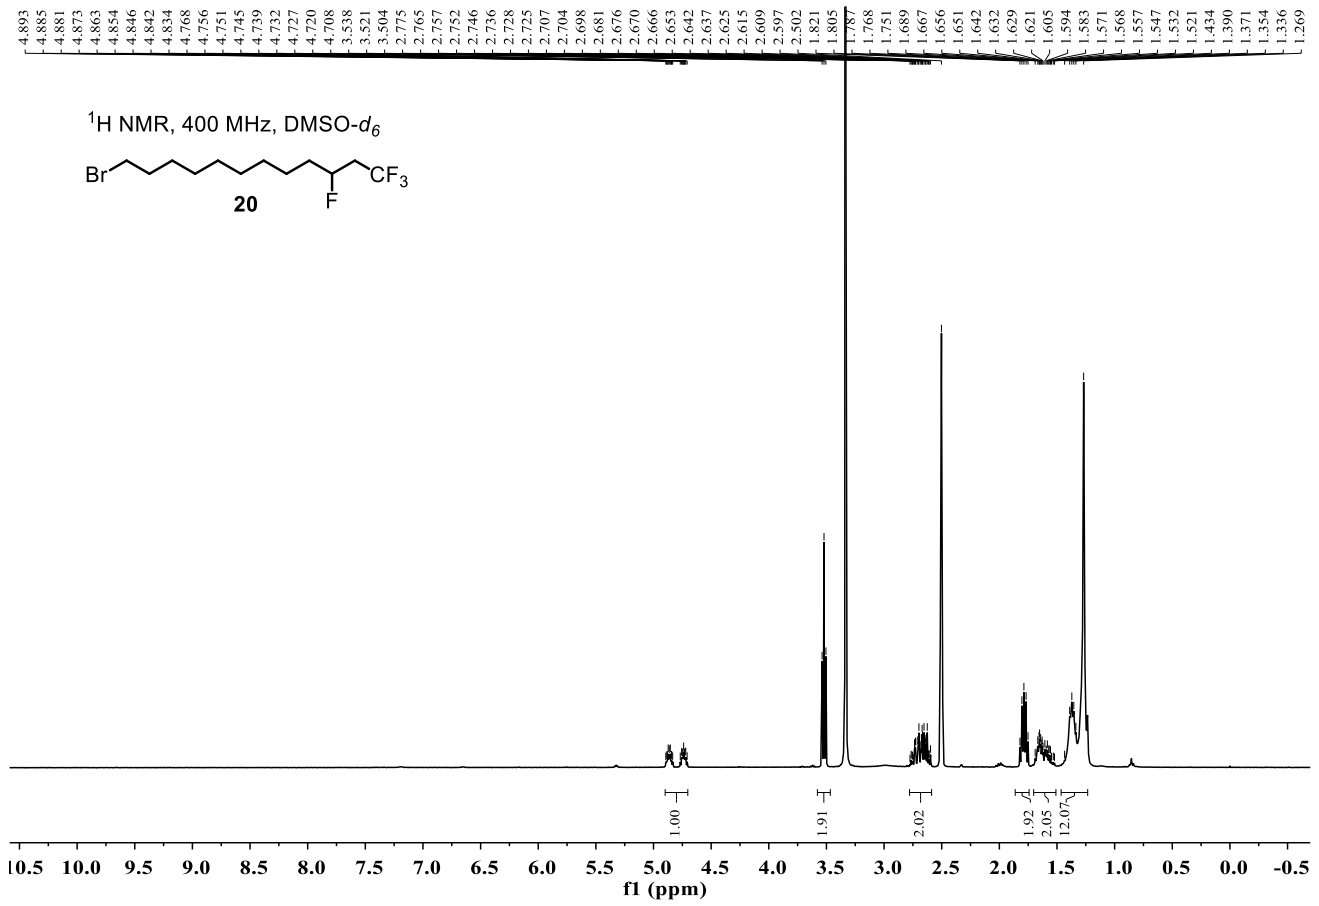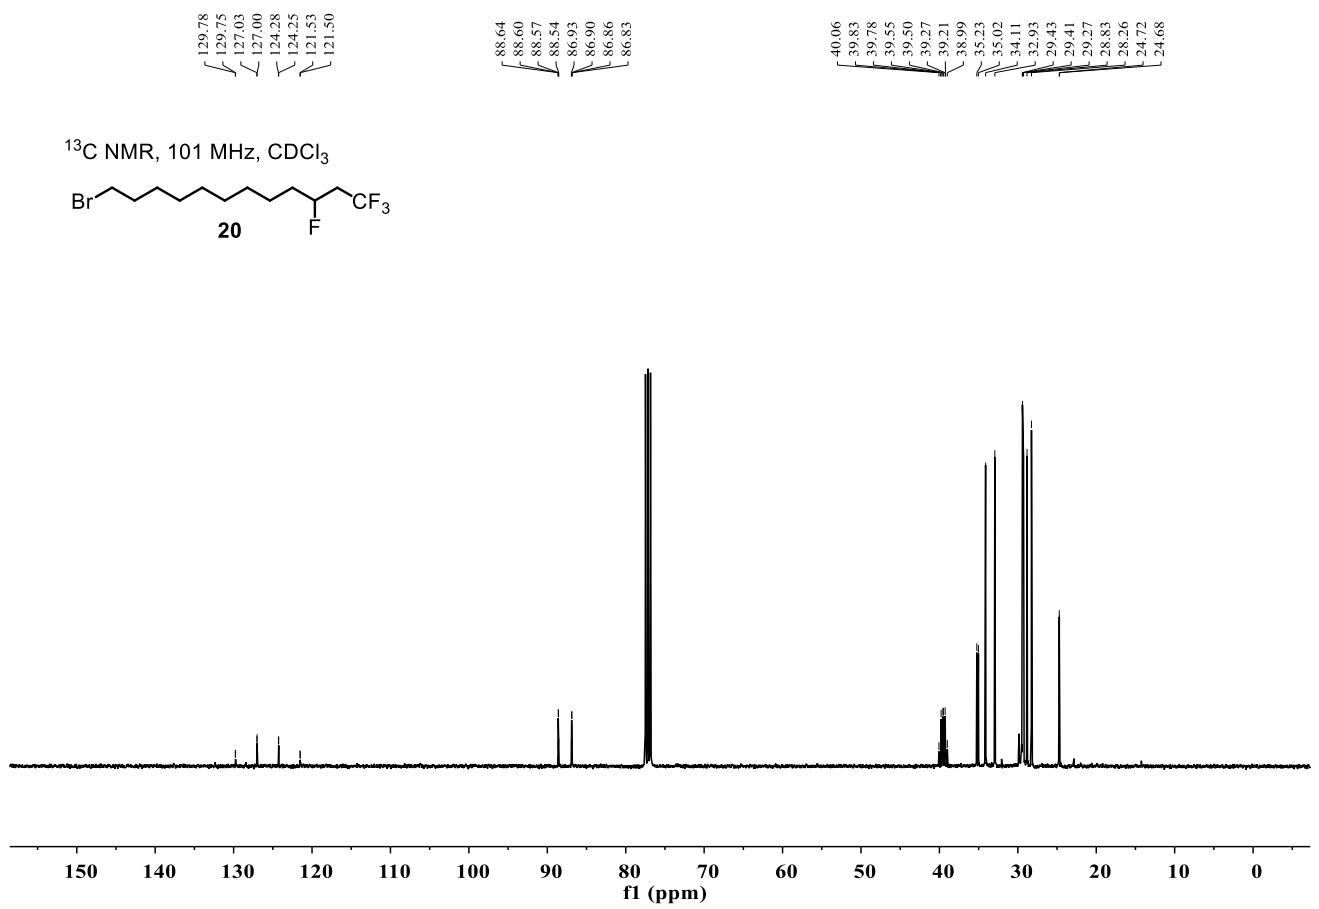

$^{19}\text{F}$  NMR, 376 MHz,  $\text{DMSO-}d_6$

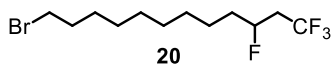

-62.44  
-62.46

-181.87  
-181.89  
-181.91  
-181.94

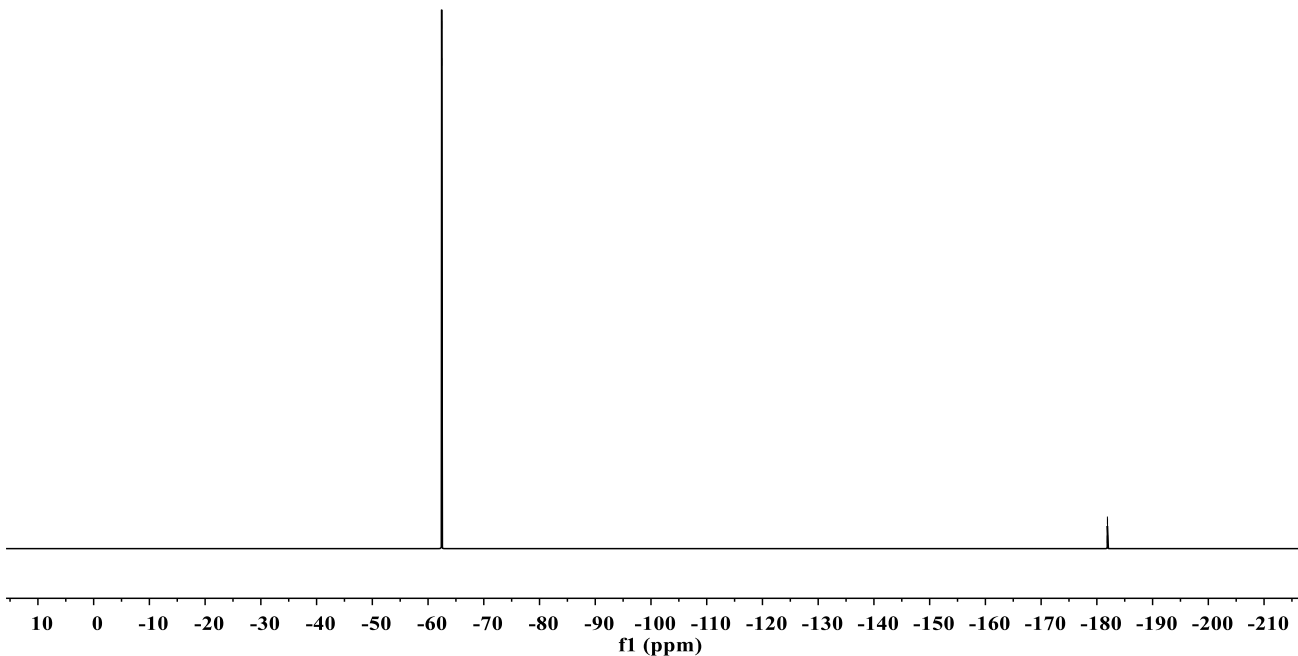

$^1\text{H}$  NMR, 400 MHz,  $\text{CDCl}_3$

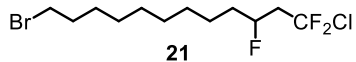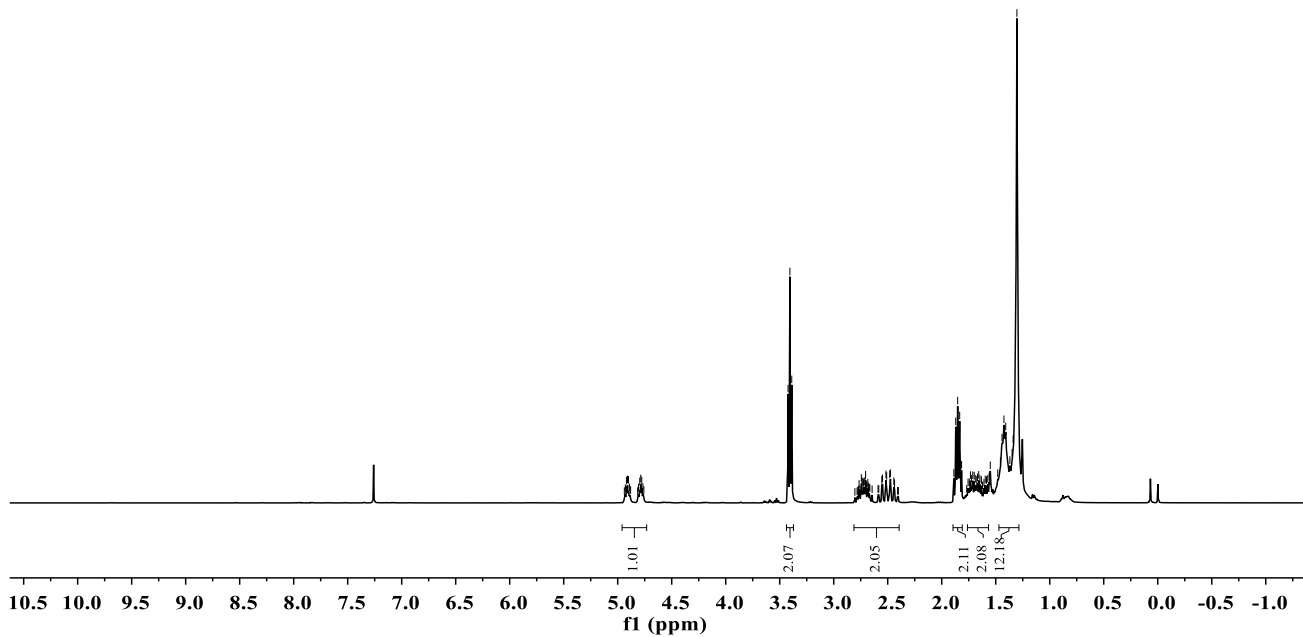

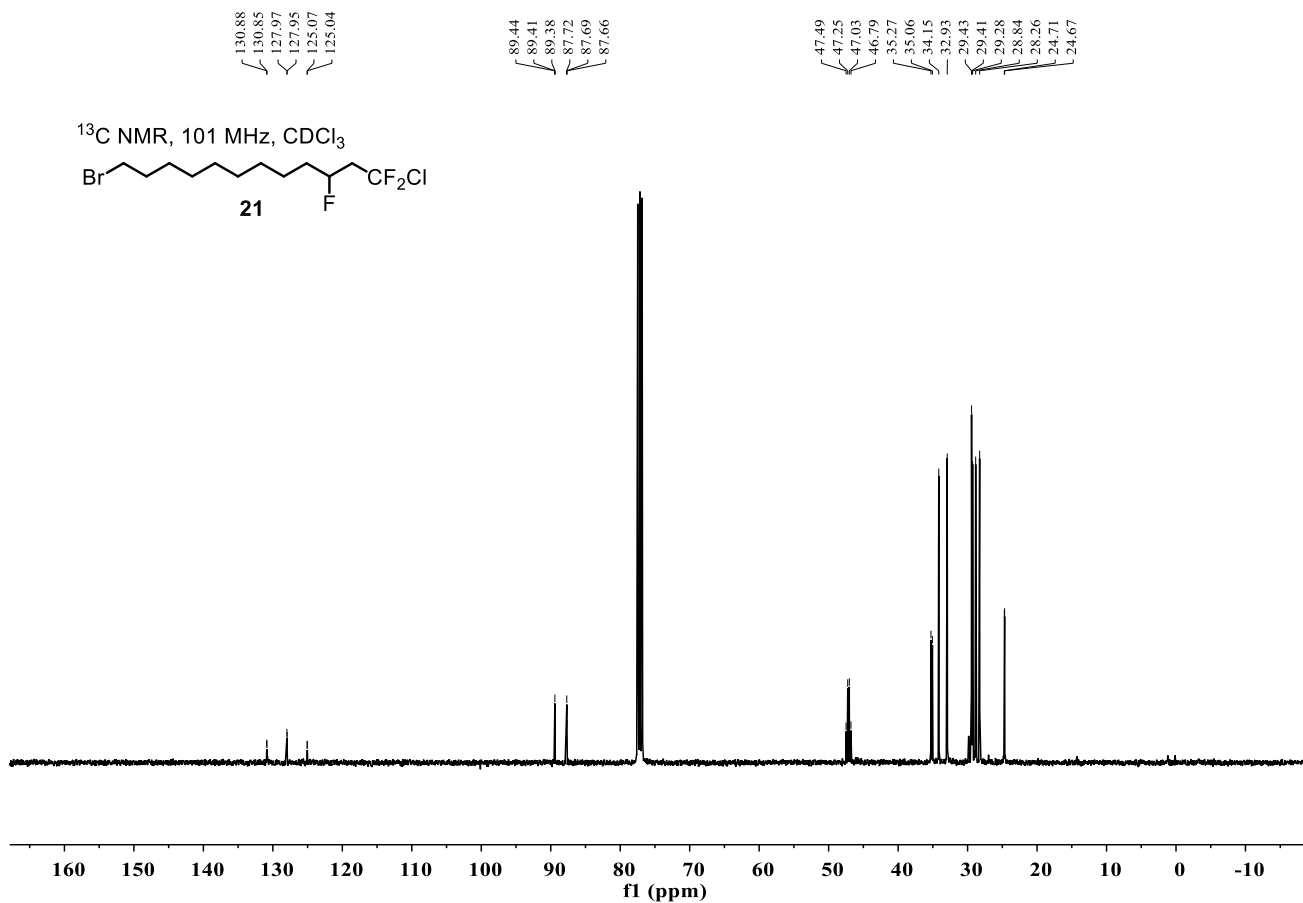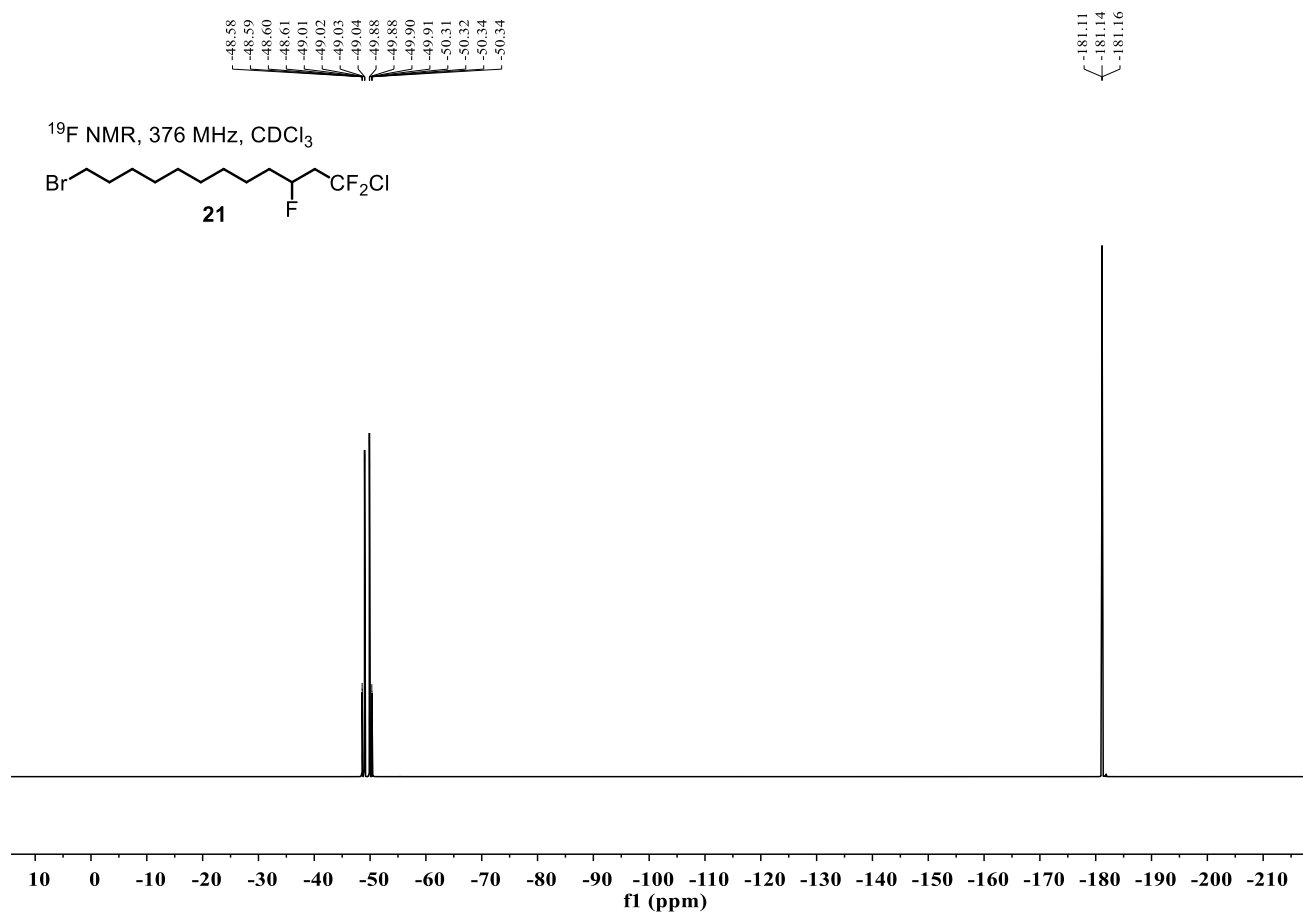

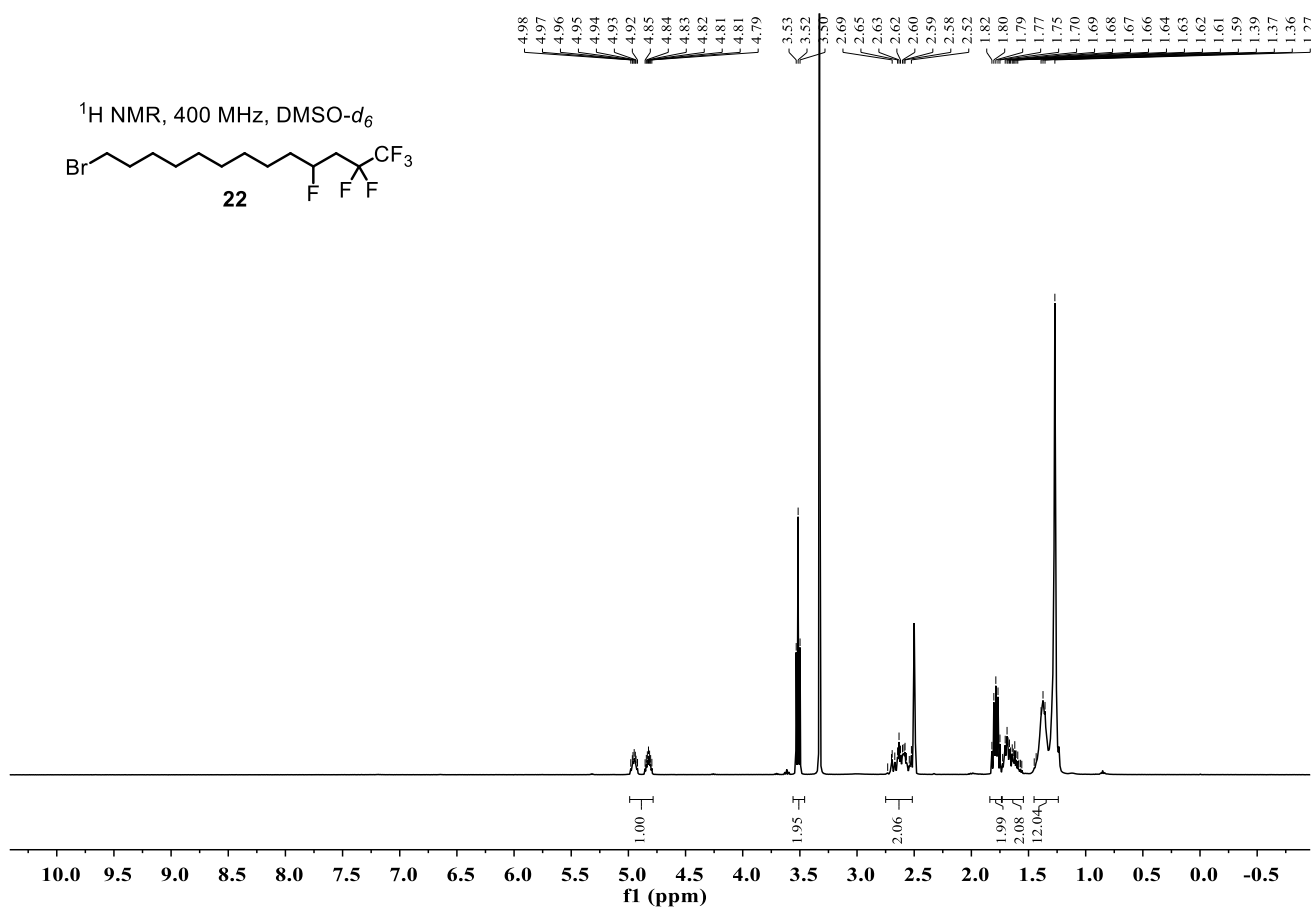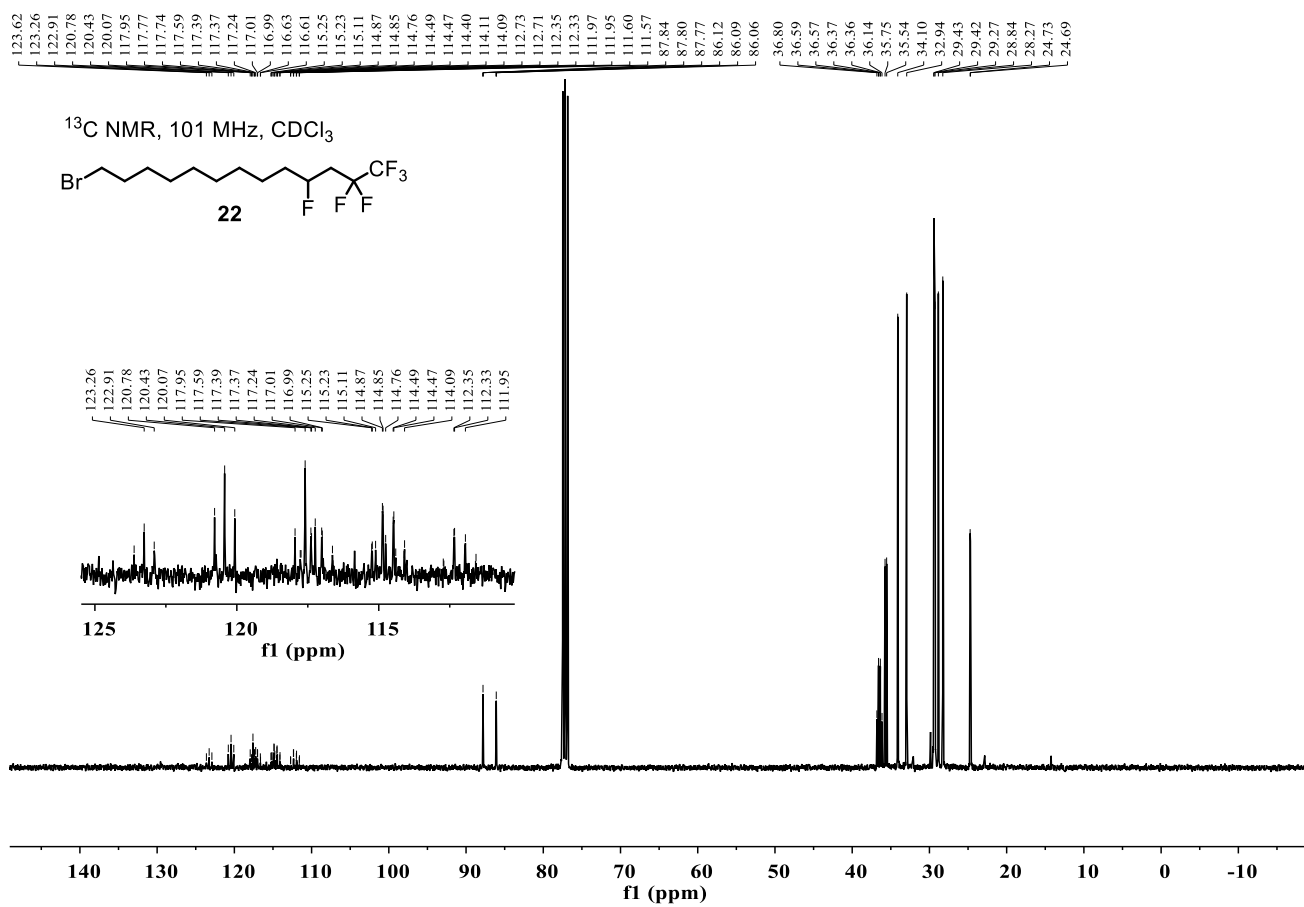



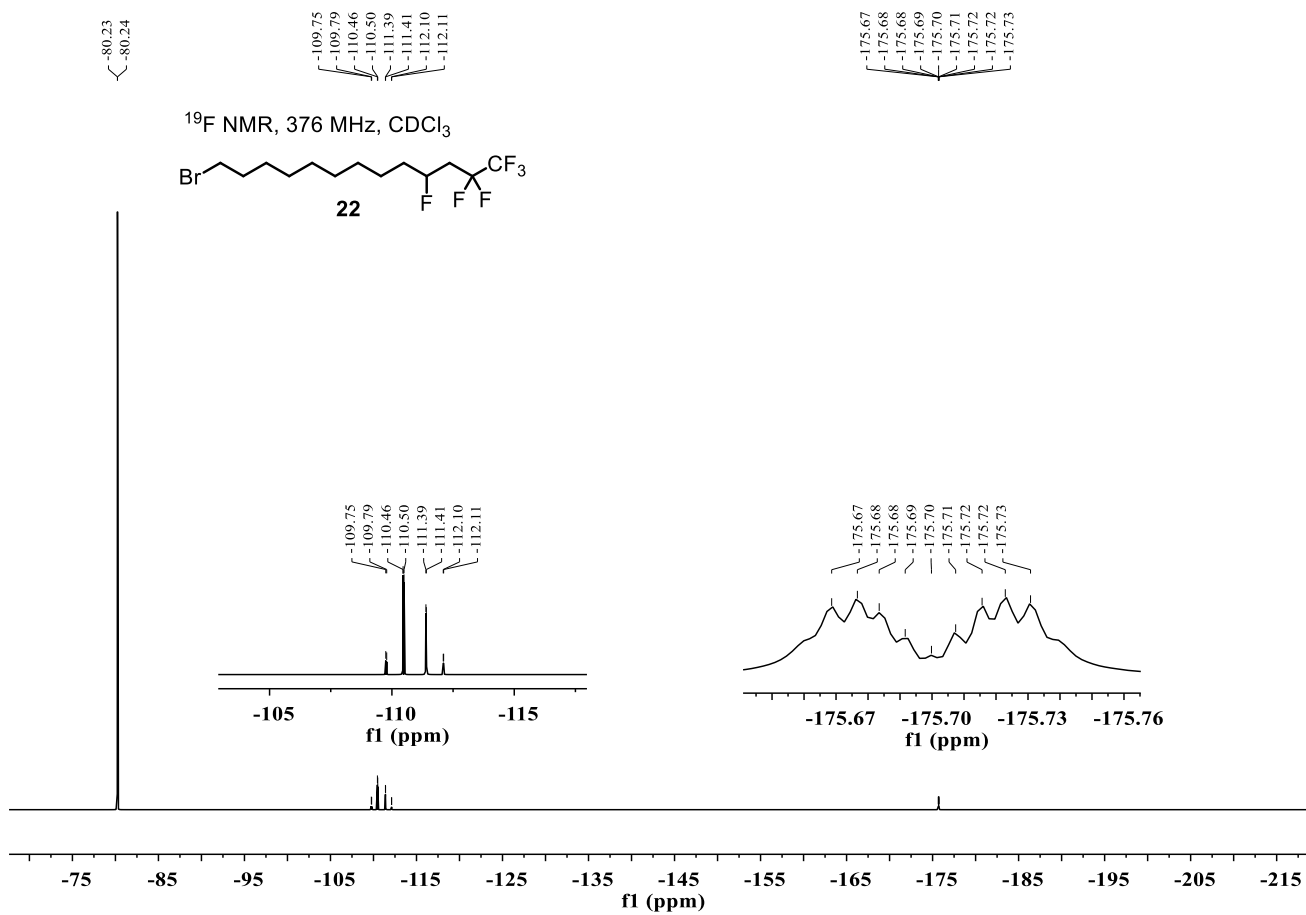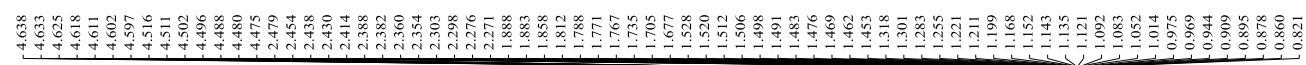

**<sup>1</sup>H NMR, 400 MHz, CDCl<sub>3</sub>**

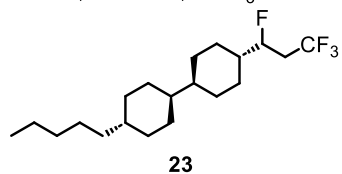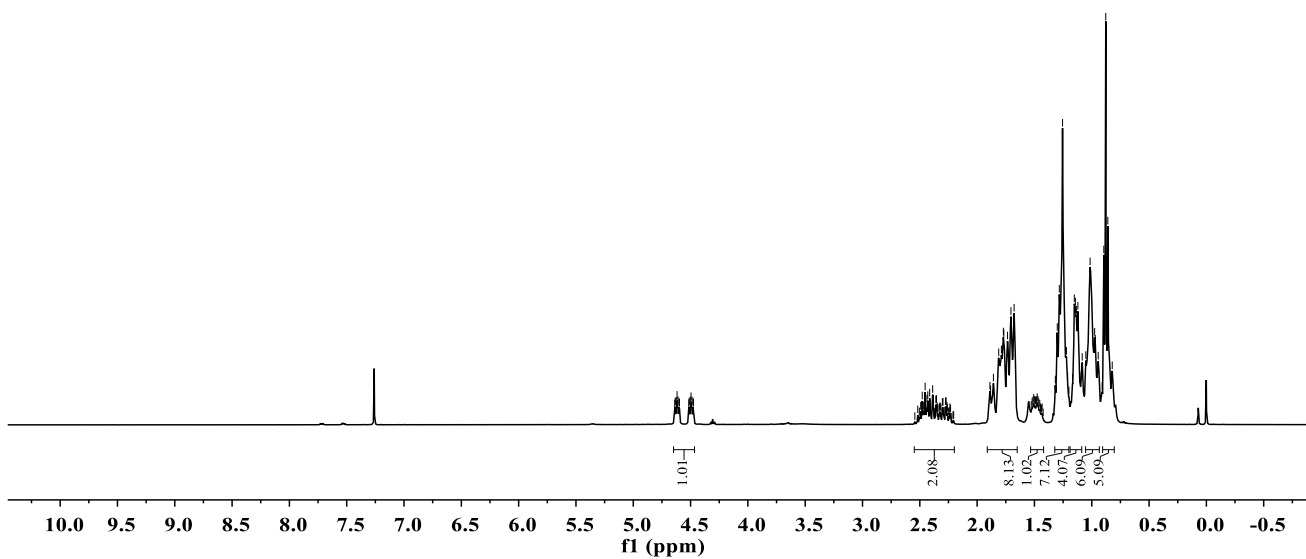



4.695  
4.691  
4.675  
4.670  
4.660  
4.656  
4.572  
4.569  
4.553  
4.537  
4.534  
2.717  
2.692  
2.683  
2.674  
2.658  
2.637  
2.627  
2.615  
2.574  
2.536  
2.492  
2.454  
1.884  
1.879  
1.854  
1.817  
1.793  
1.776  
1.739  
1.712  
1.685  
1.535  
1.527  
1.519  
1.513  
1.505  
1.498  
1.490  
1.483  
1.476  
1.469  
1.460  
1.453  
1.444  
1.439  
1.432  
1.340  
1.323  
1.306  
1.288  
1.270  
1.255  
1.226  
1.216  
1.205  
1.186  
1.158  
1.139  
1.132  
1.106  
1.098  
1.066  
1.019  
0.981  
0.949  
0.916  
0.899  
0.882  
0.864  
0.827  
0.799

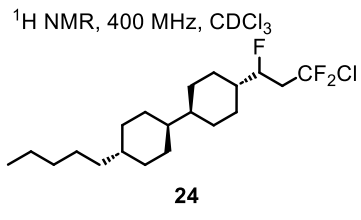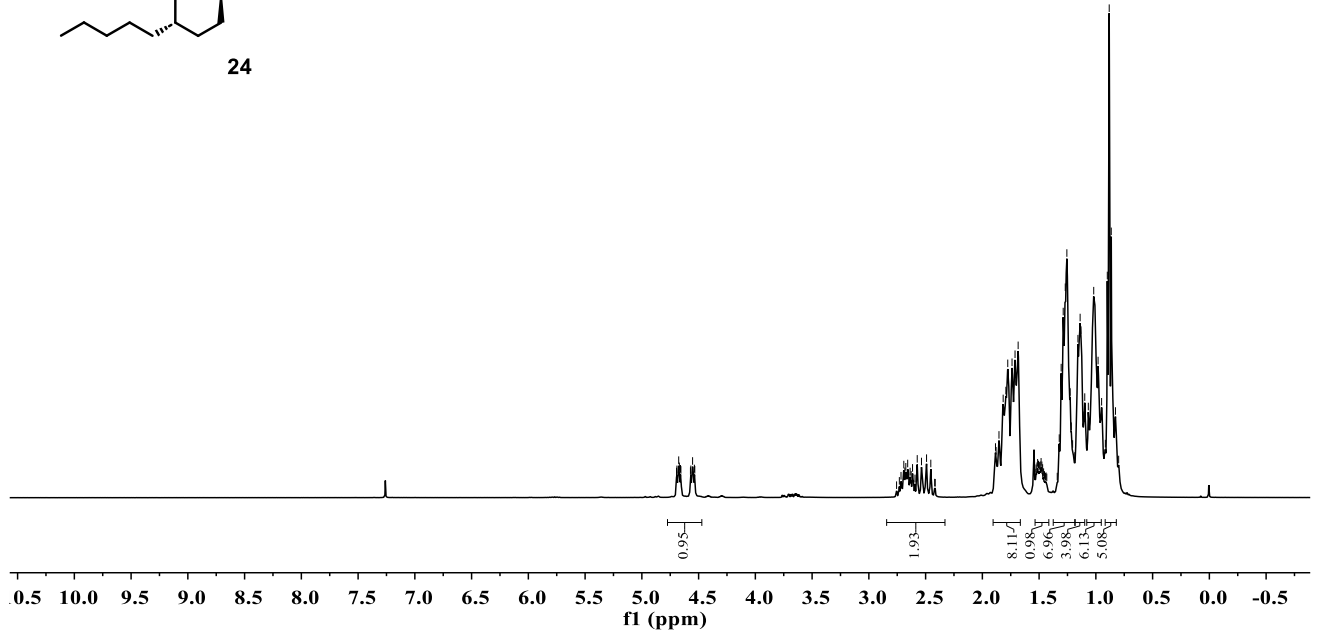

131.45  
128.54  
125.63

92.81  
92.79  
92.76  
91.07  
91.04  
91.02

45.25  
45.02  
44.79  
44.55  
43.40  
43.14  
42.42  
42.22  
38.06  
37.62  
33.74  
32.41  
30.20  
29.47  
29.31  
28.62  
28.58  
27.56  
27.20  
26.85  
22.88  
14.27

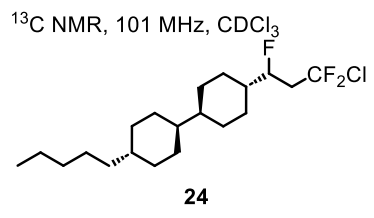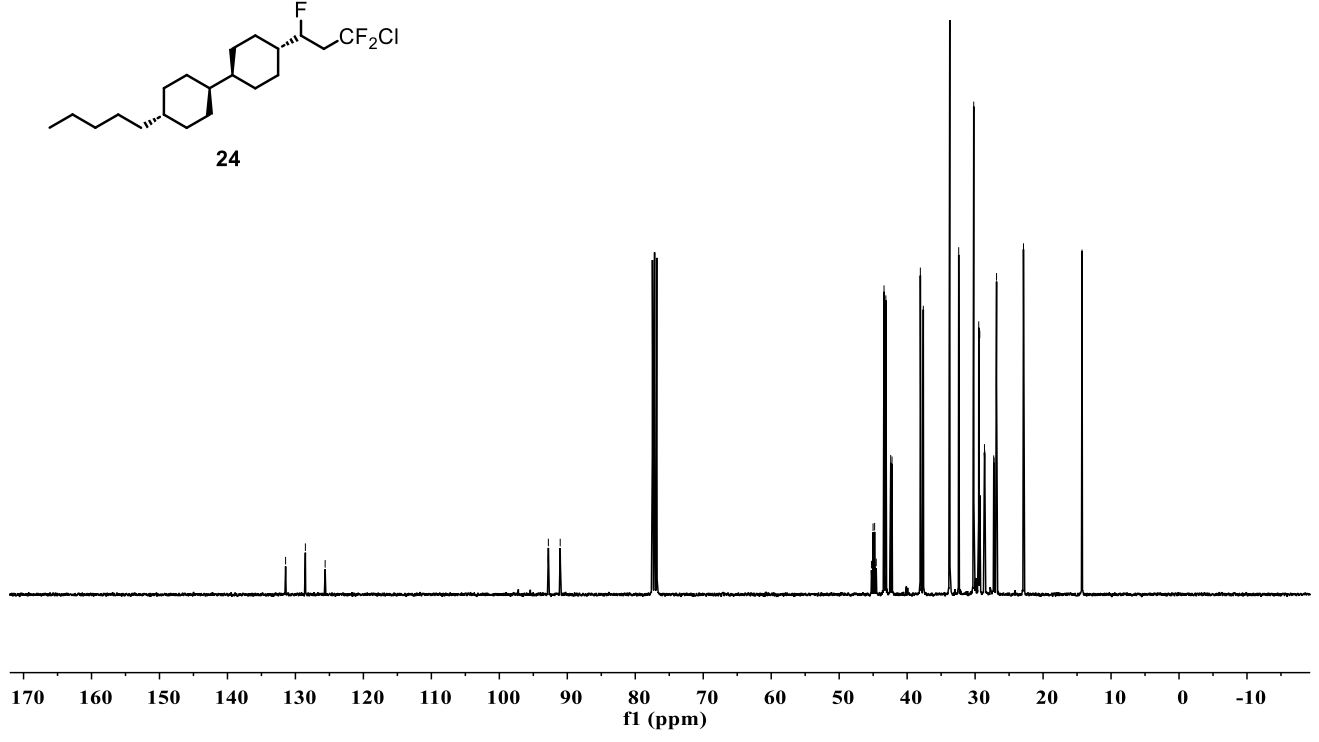

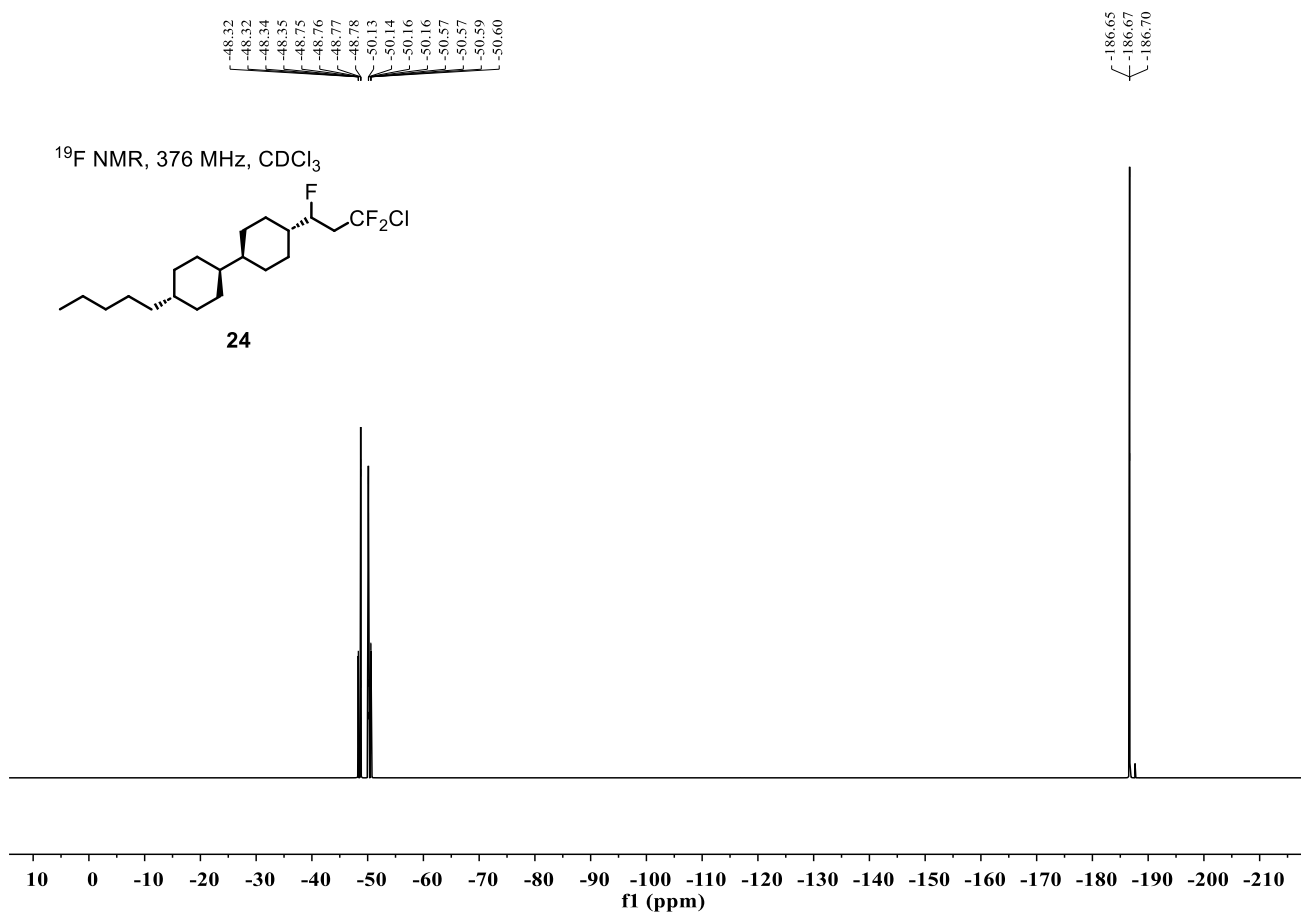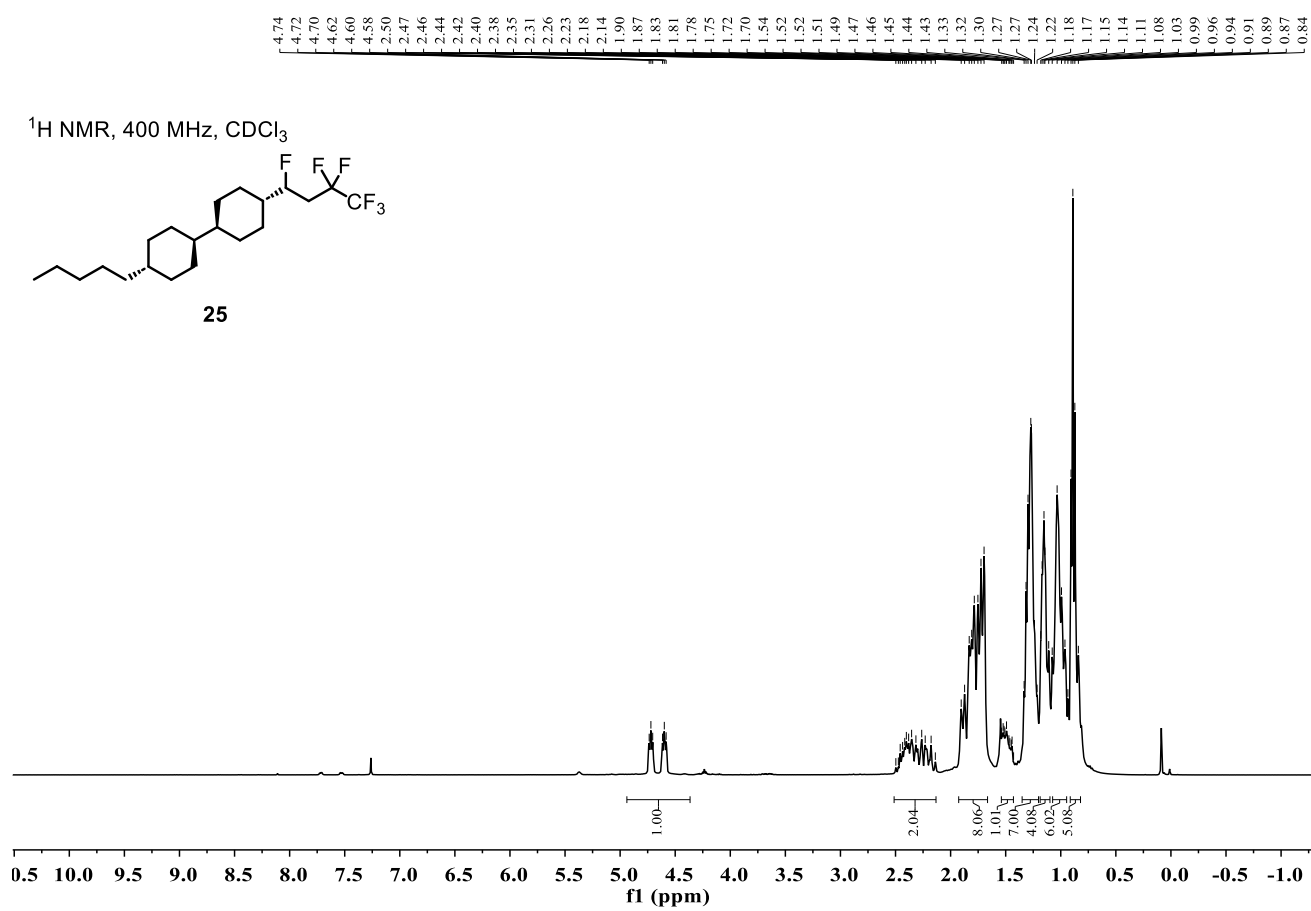

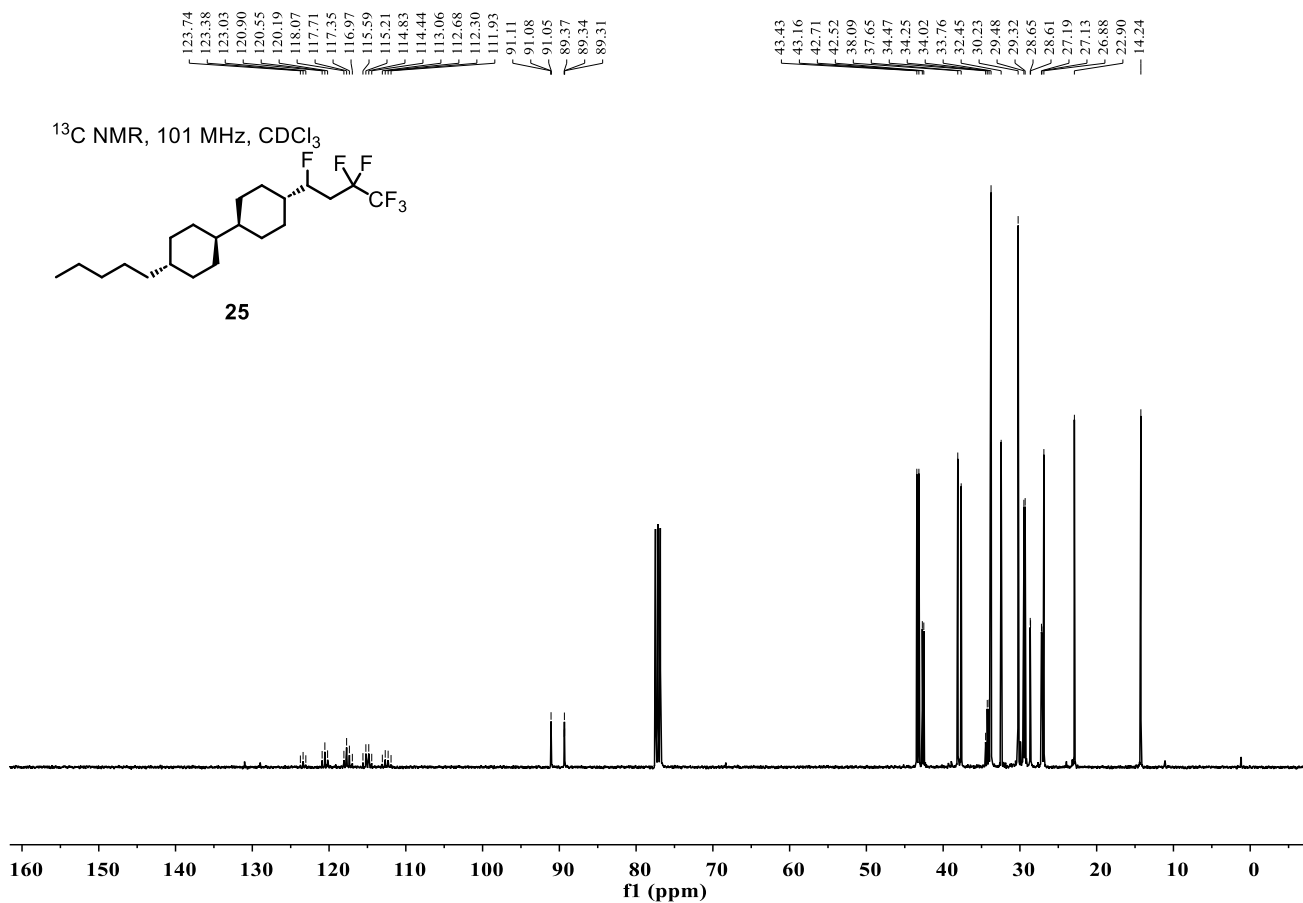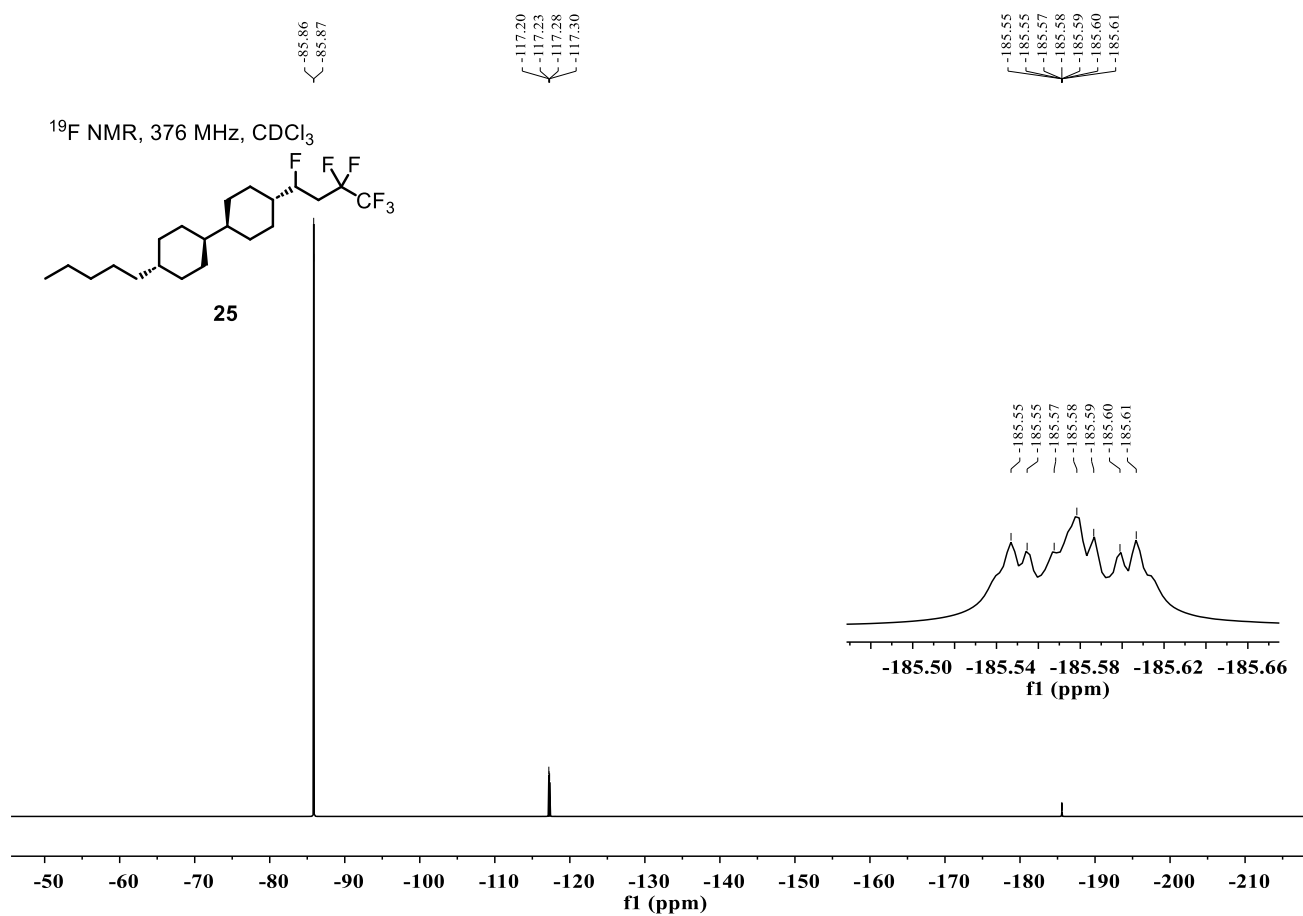

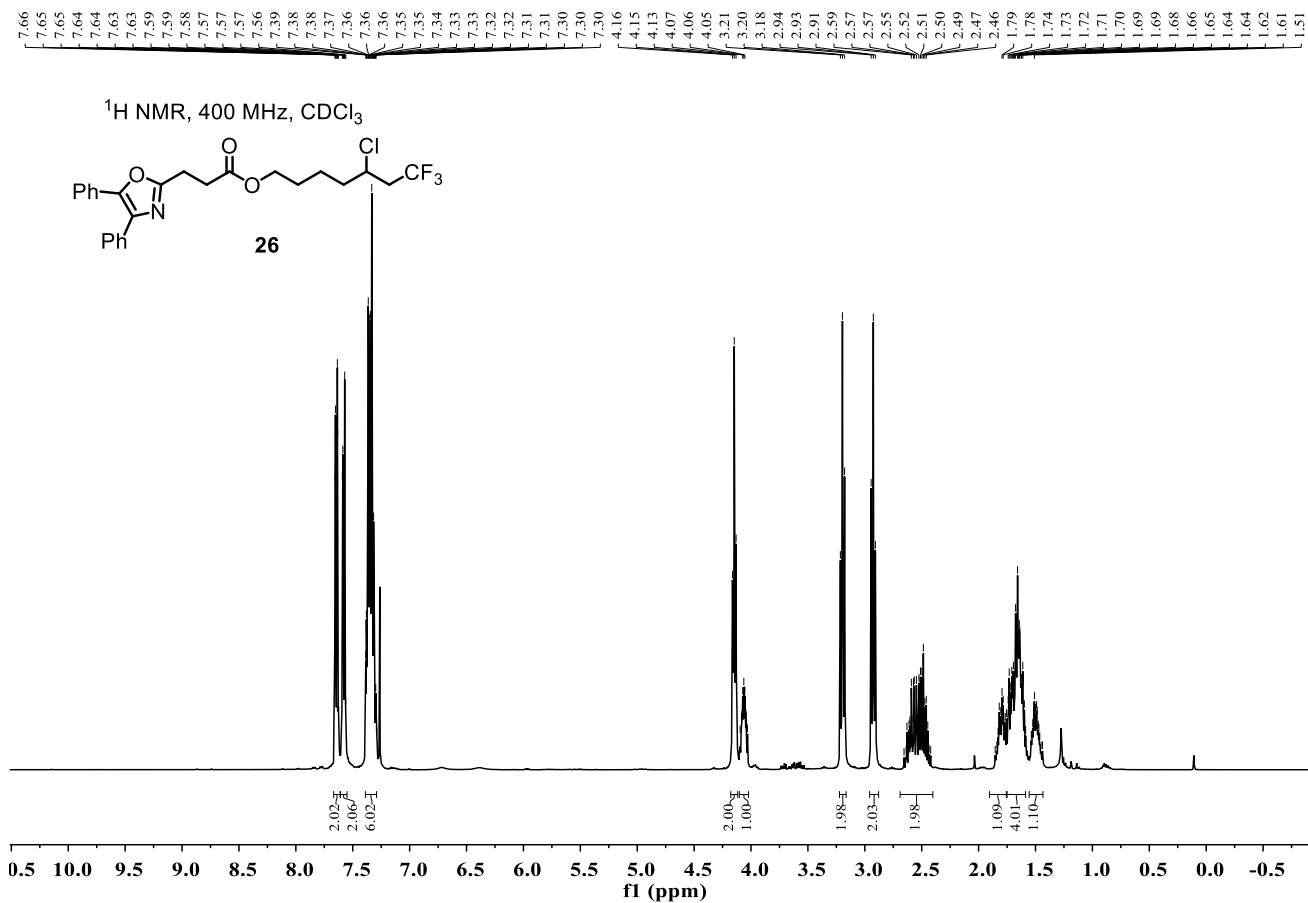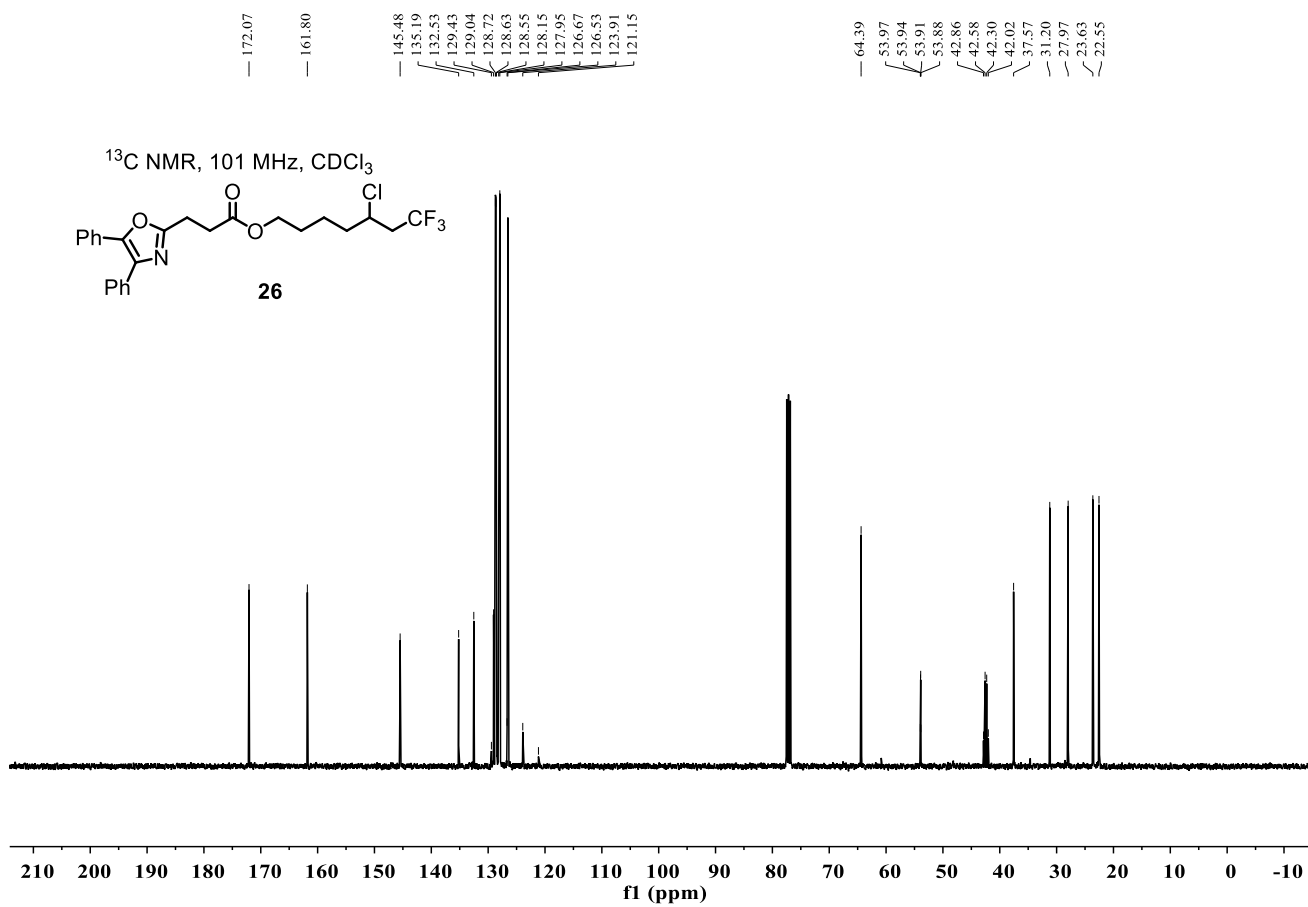

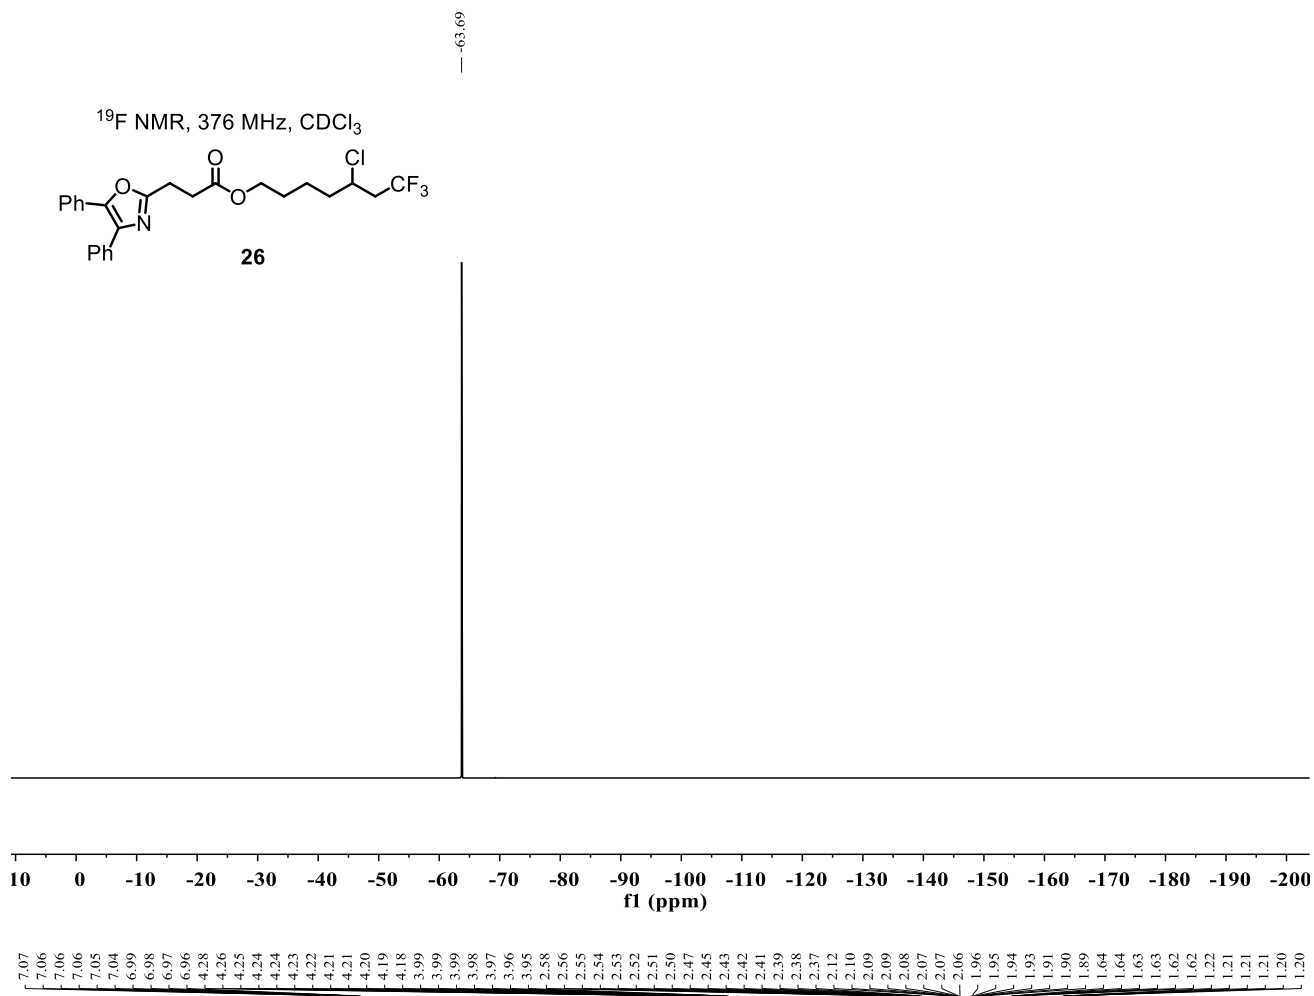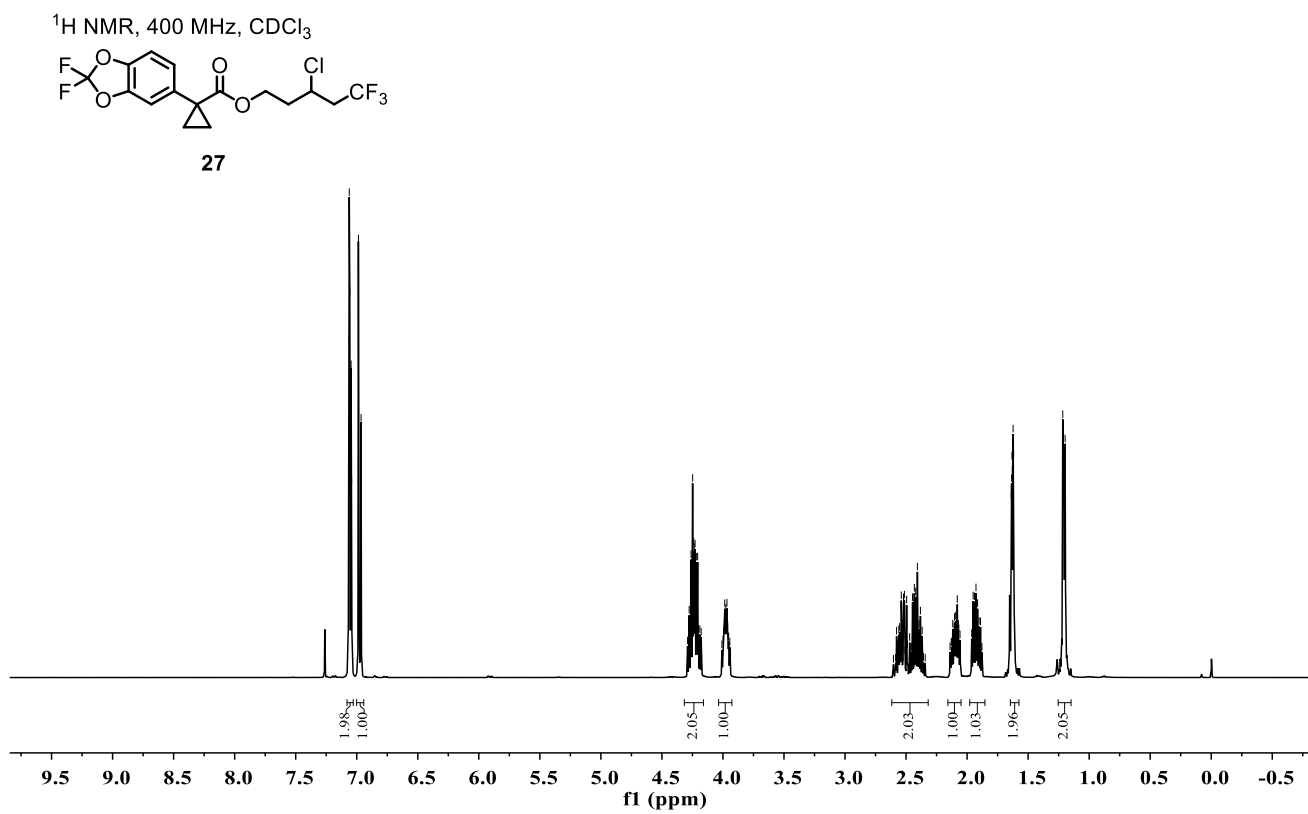

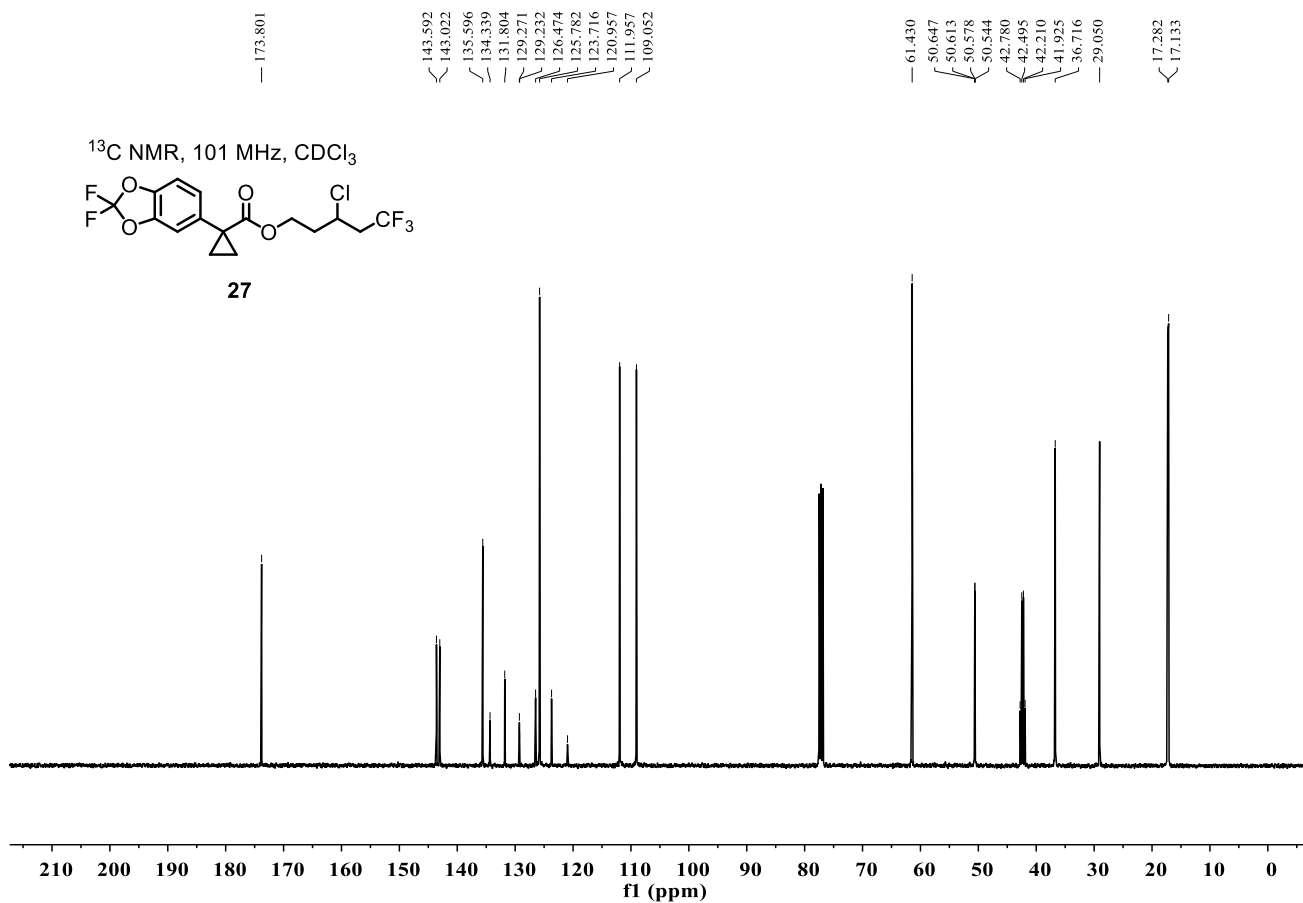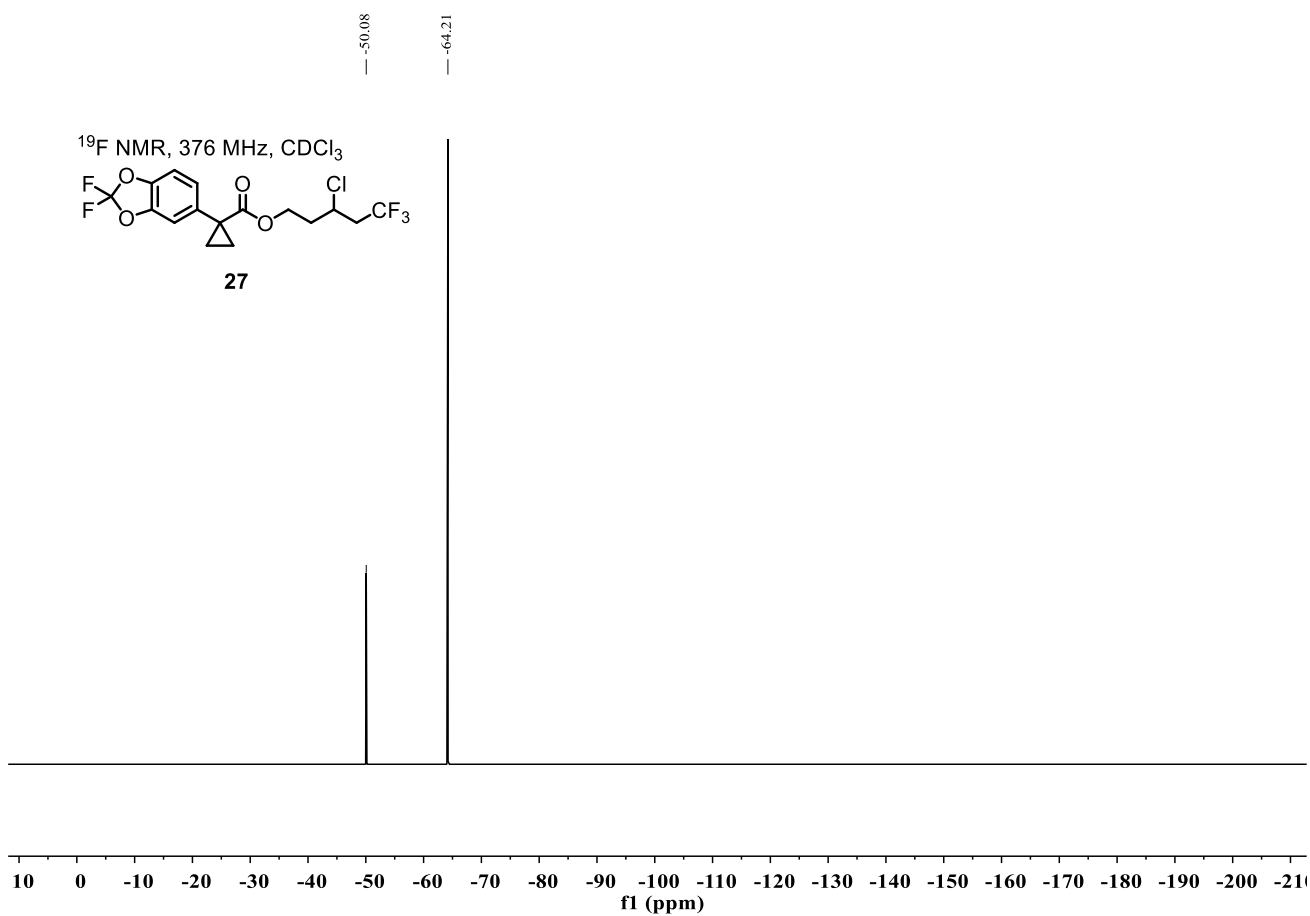



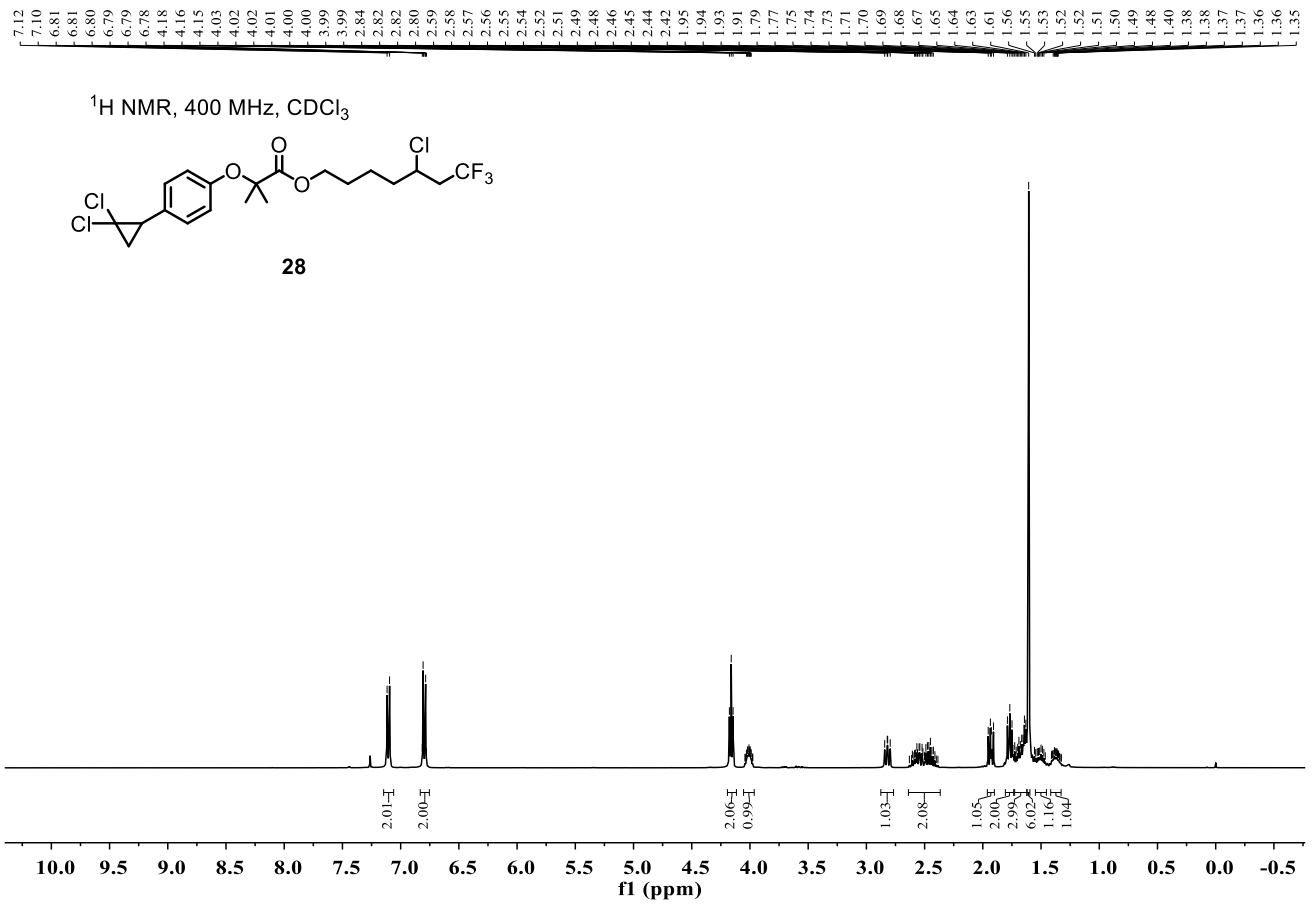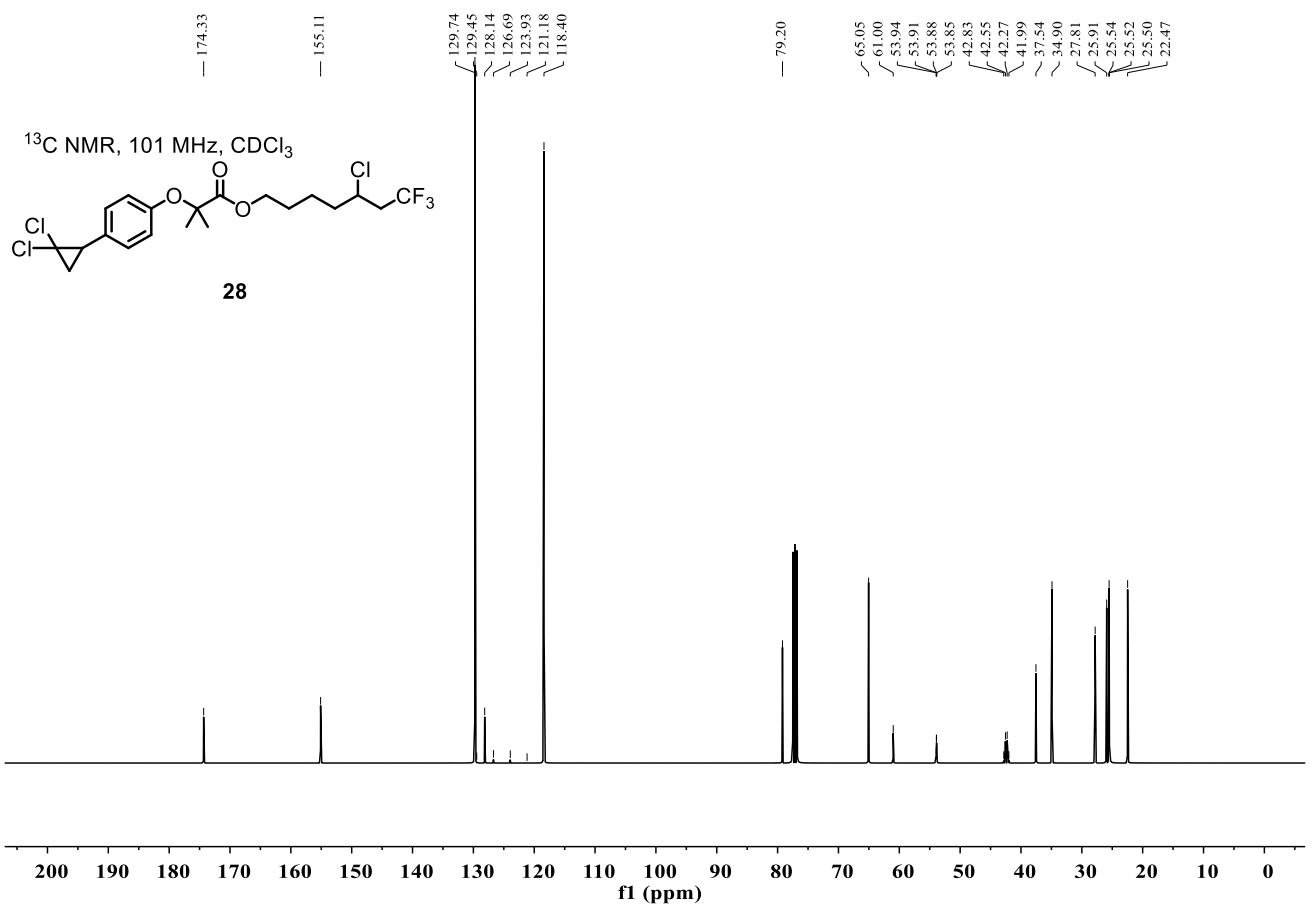

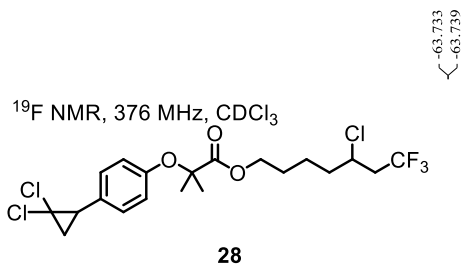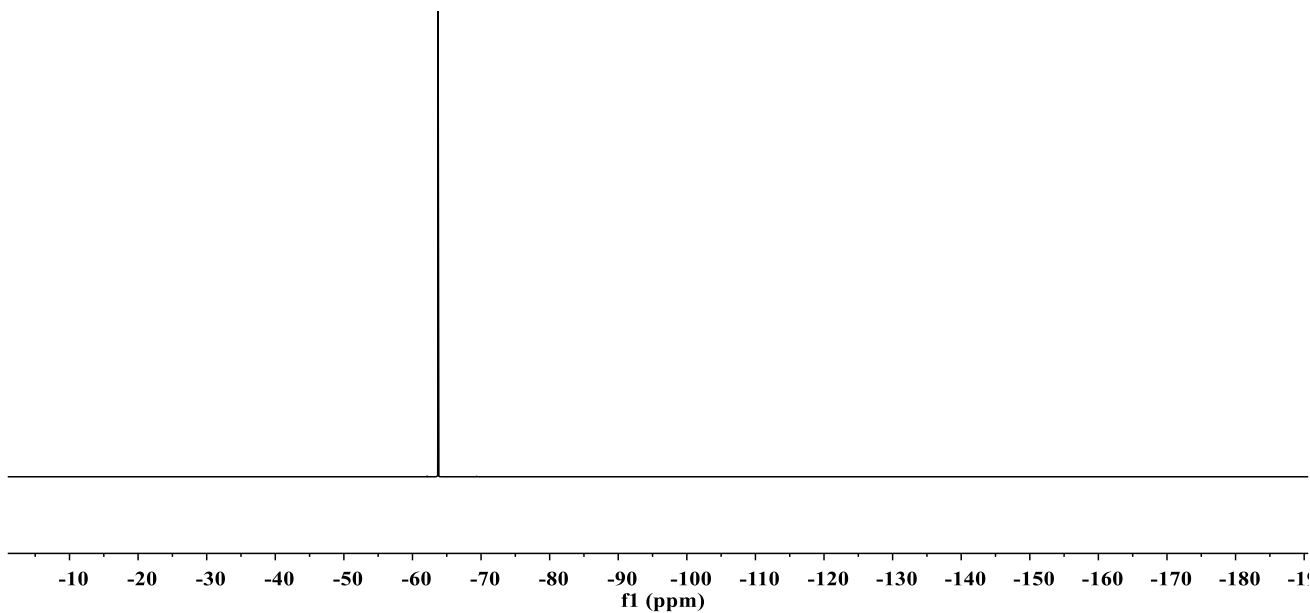

4.29  
4.28  
4.26  
4.26  
4.20  
4.19  
4.18  
4.17  
4.12  
4.11  
4.11  
4.10  
4.09  
4.08  
4.07  
4.04  
3.52  
3.51  
3.49  
3.45  
3.44  
3.43  
3.42  
3.41  
3.36  
2.61  
2.60  
2.59  
2.57  
2.56  
2.55  
2.54  
2.52  
2.51  
2.50  
2.20  
2.18  
2.16  
2.15  
2.15  
1.95  
1.94  
1.93  
1.91  
1.91  
1.88  
1.86  
1.86  
1.85  
1.84  
1.83  
1.81  
1.81  
1.79  
1.78  
1.75  
1.74  
1.73  
1.73  
1.72  
1.70  
1.68  
1.67  
1.65  
1.64  
1.61  
1.60  
1.58  
1.52  
1.51  
1.51  
1.48  
1.48  
1.47  
1.46  
1.42  
1.38

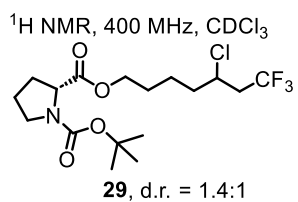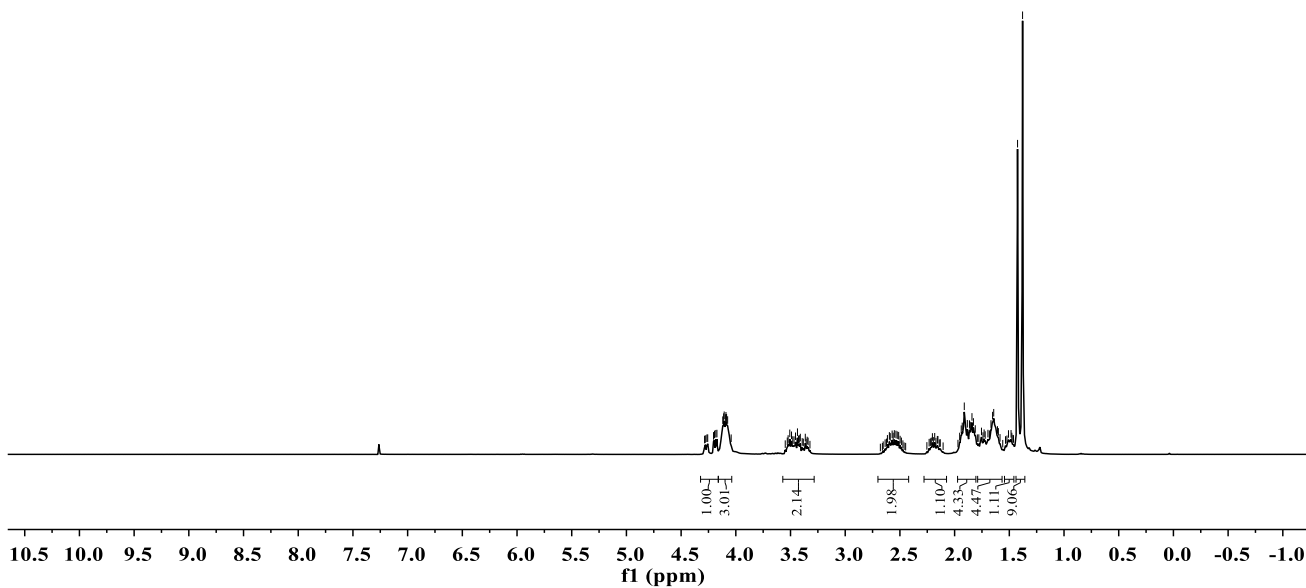

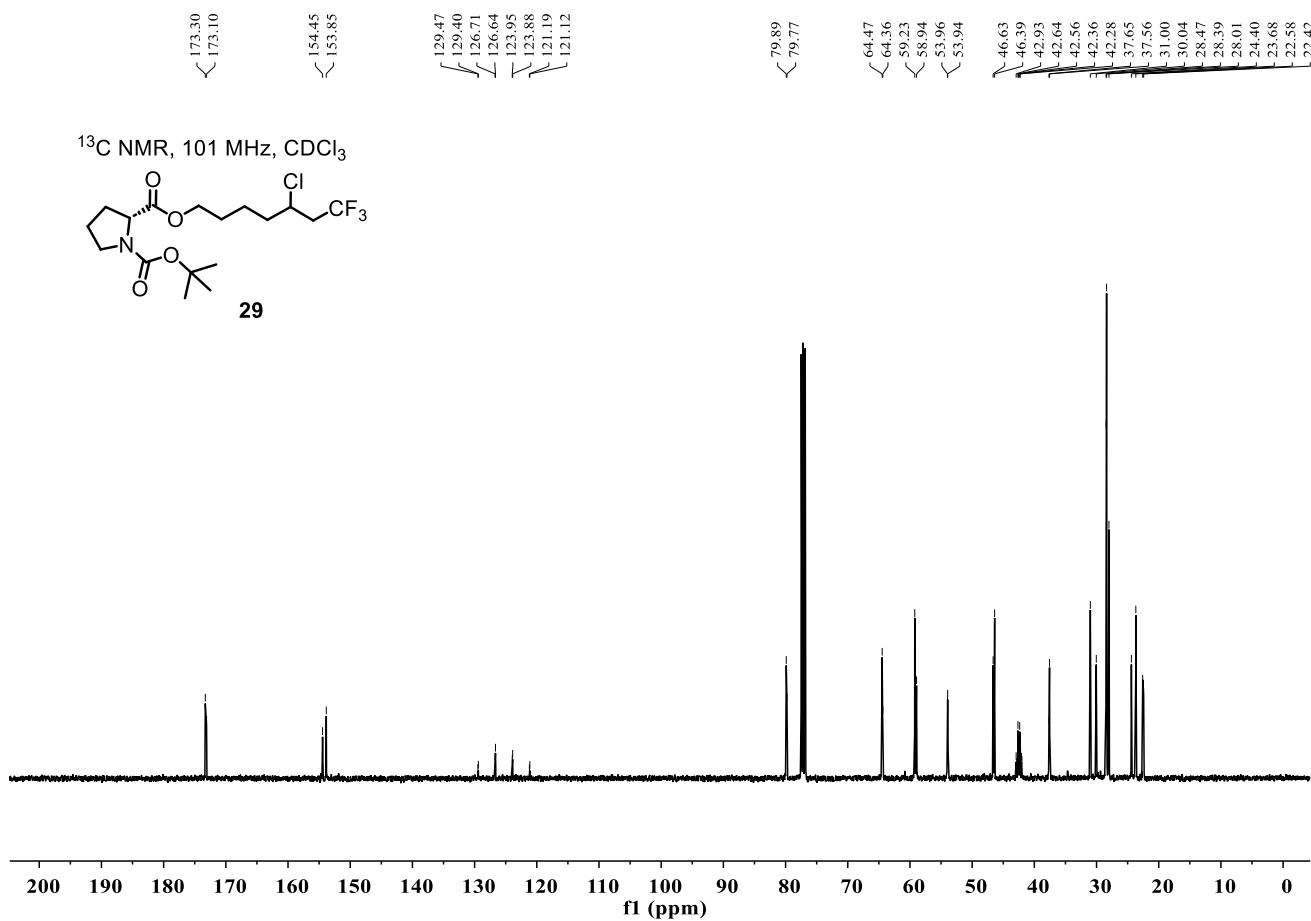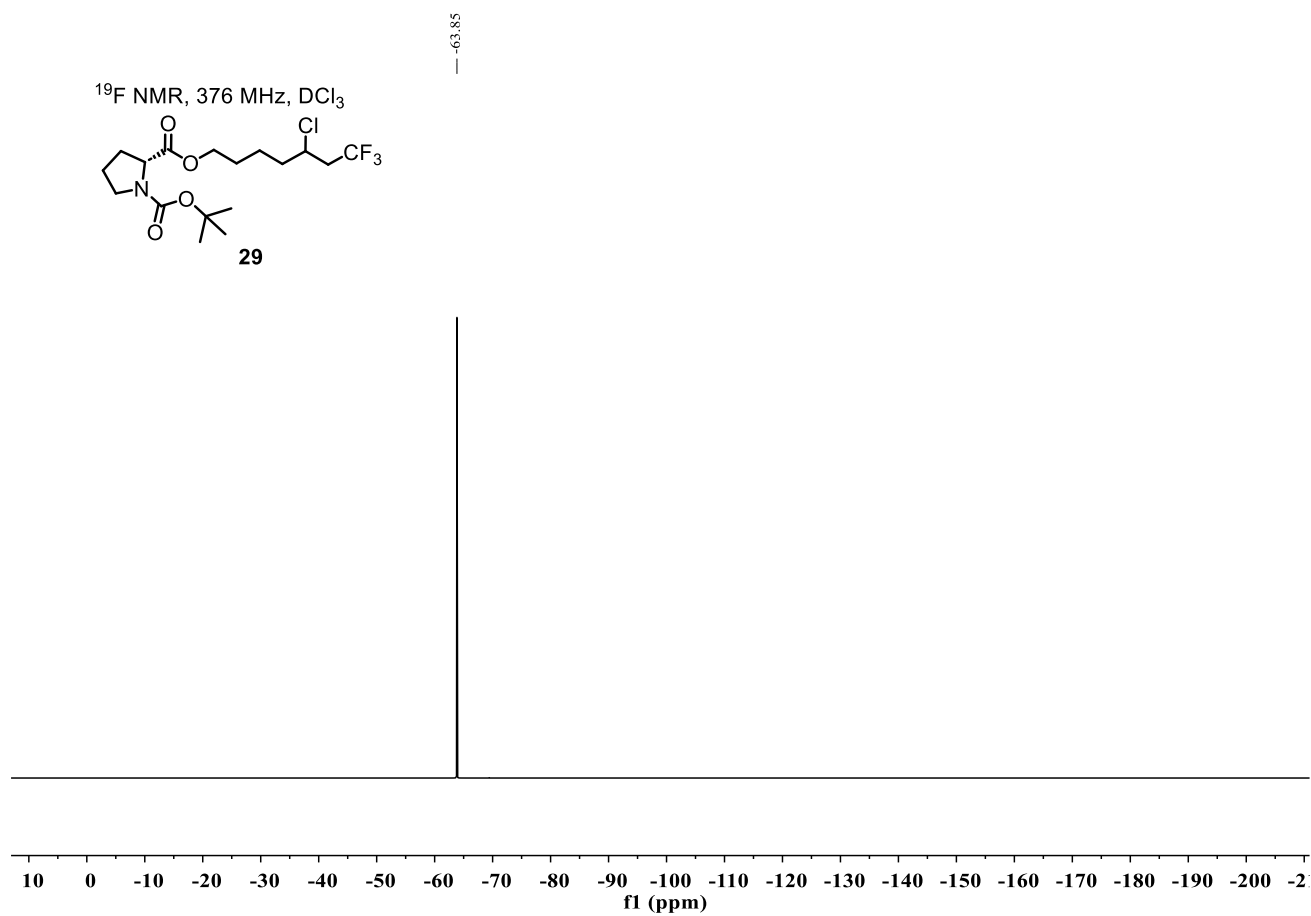

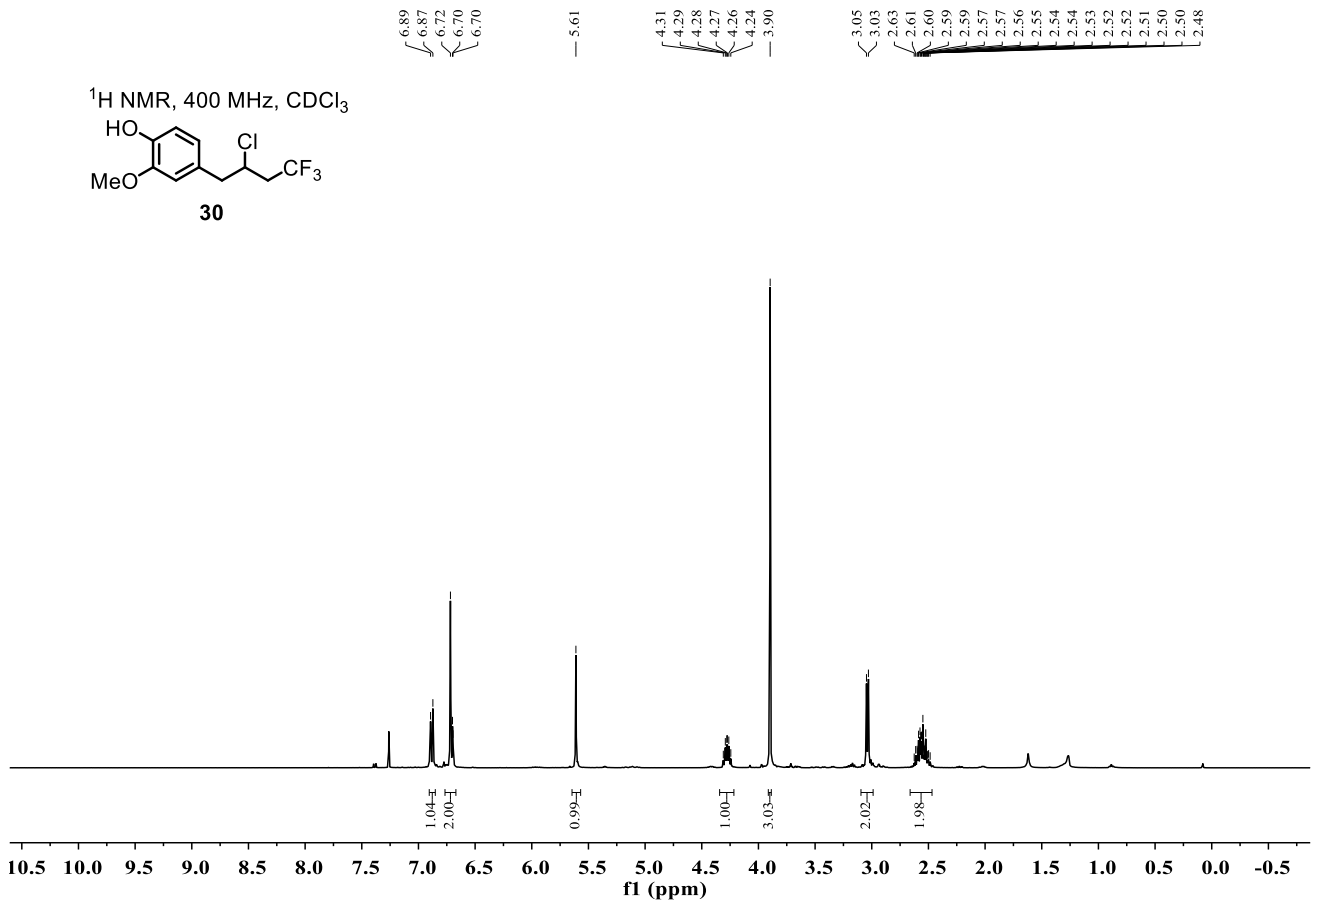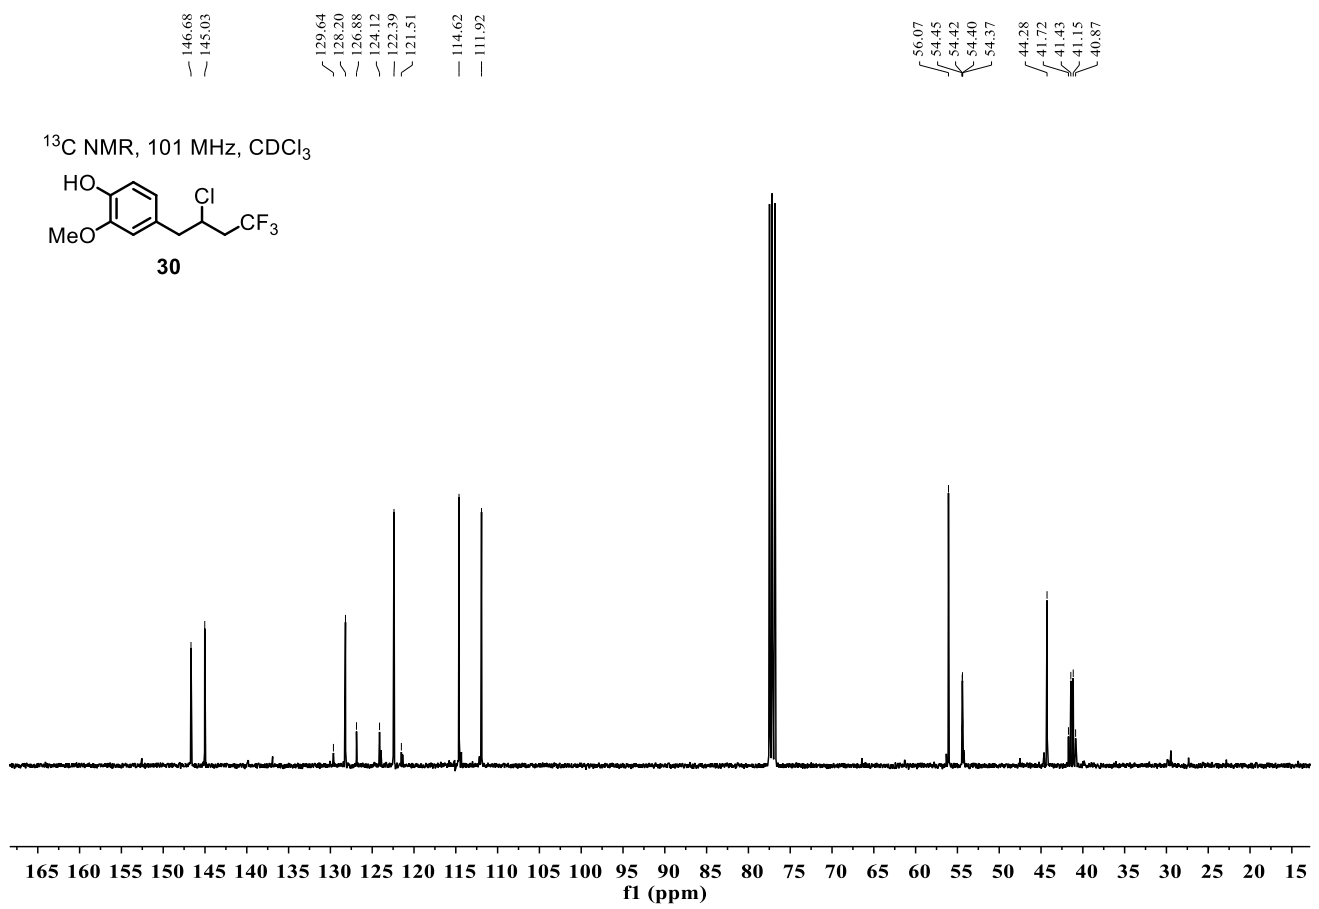

<sup>19</sup>F NMR, 376 MHz, CDCl<sub>3</sub>

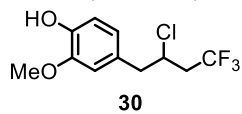

— -63.55

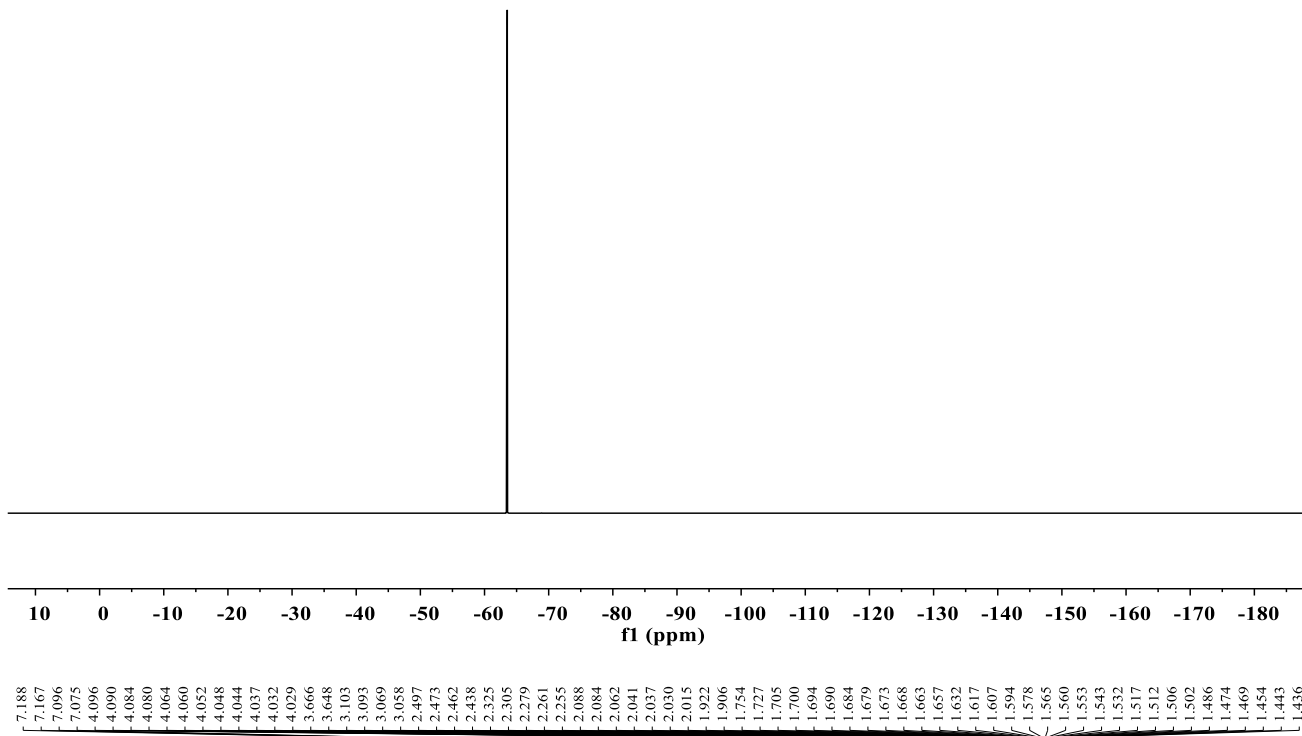

<sup>1</sup>H NMR, 400 MHz, CDCl<sub>3</sub>

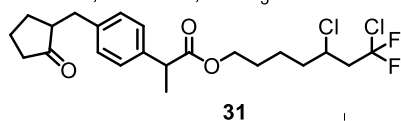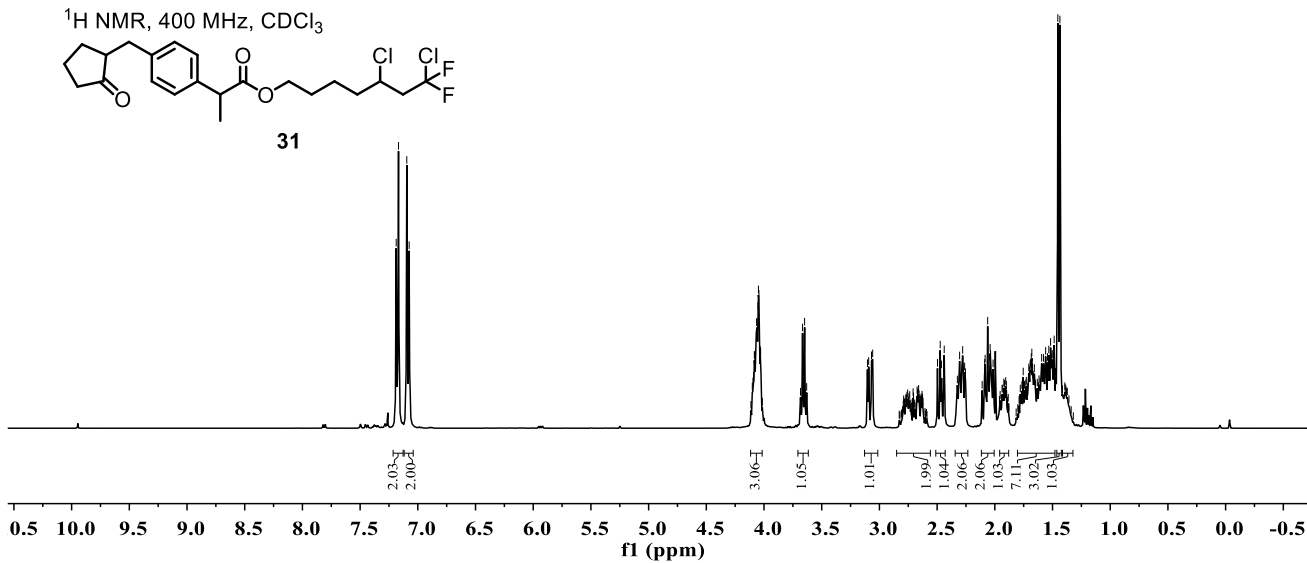

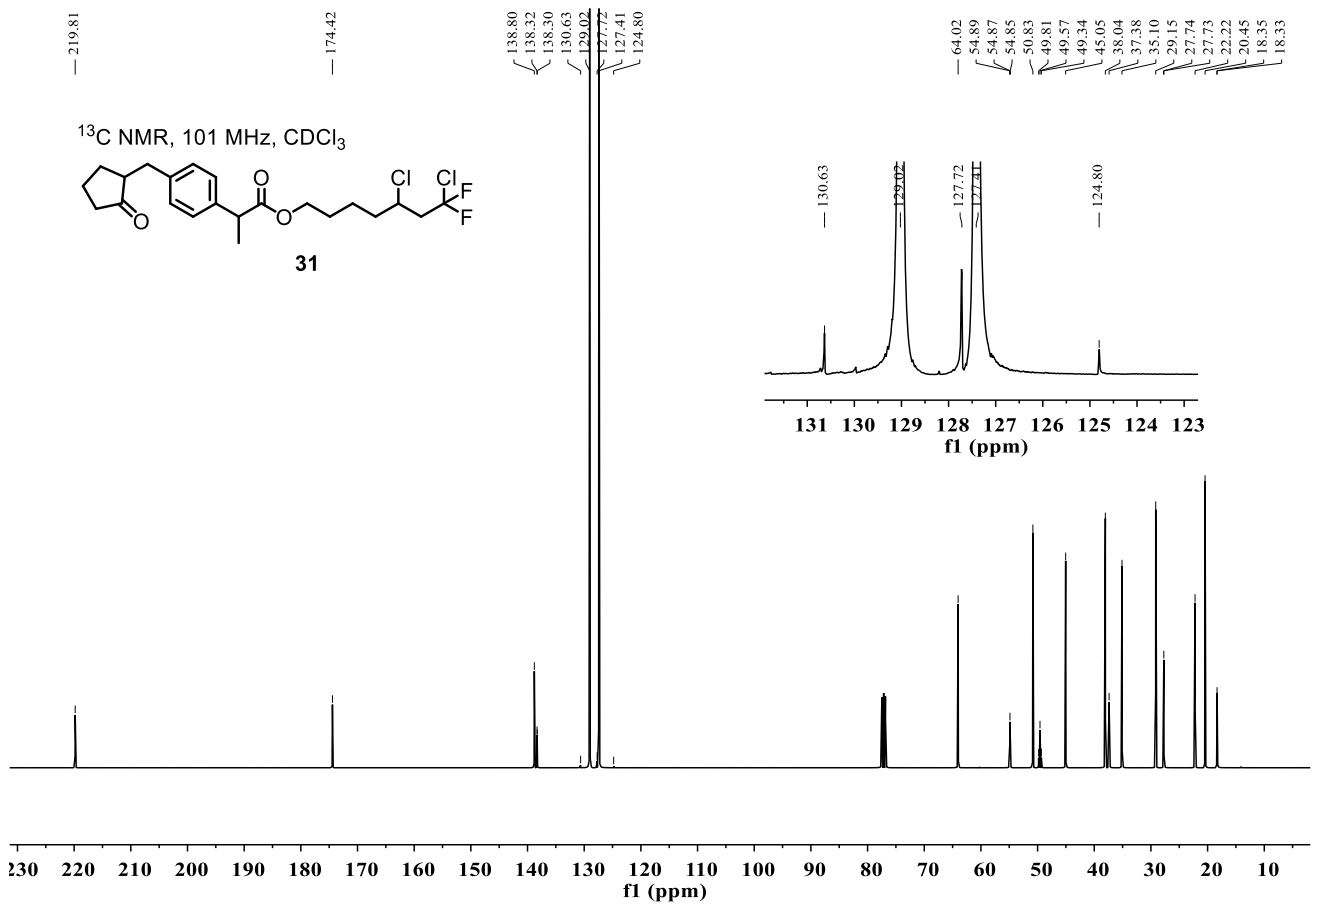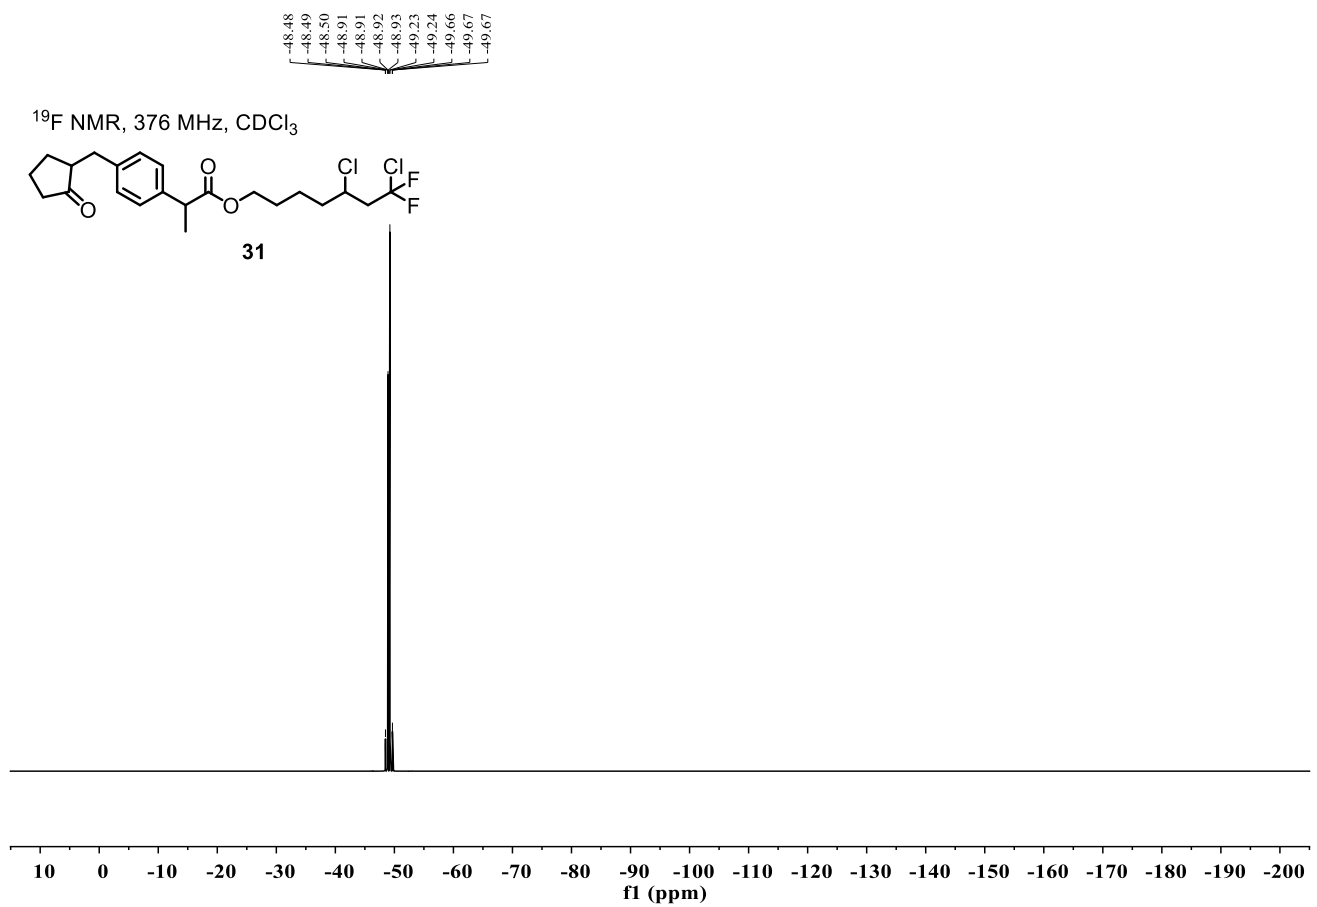

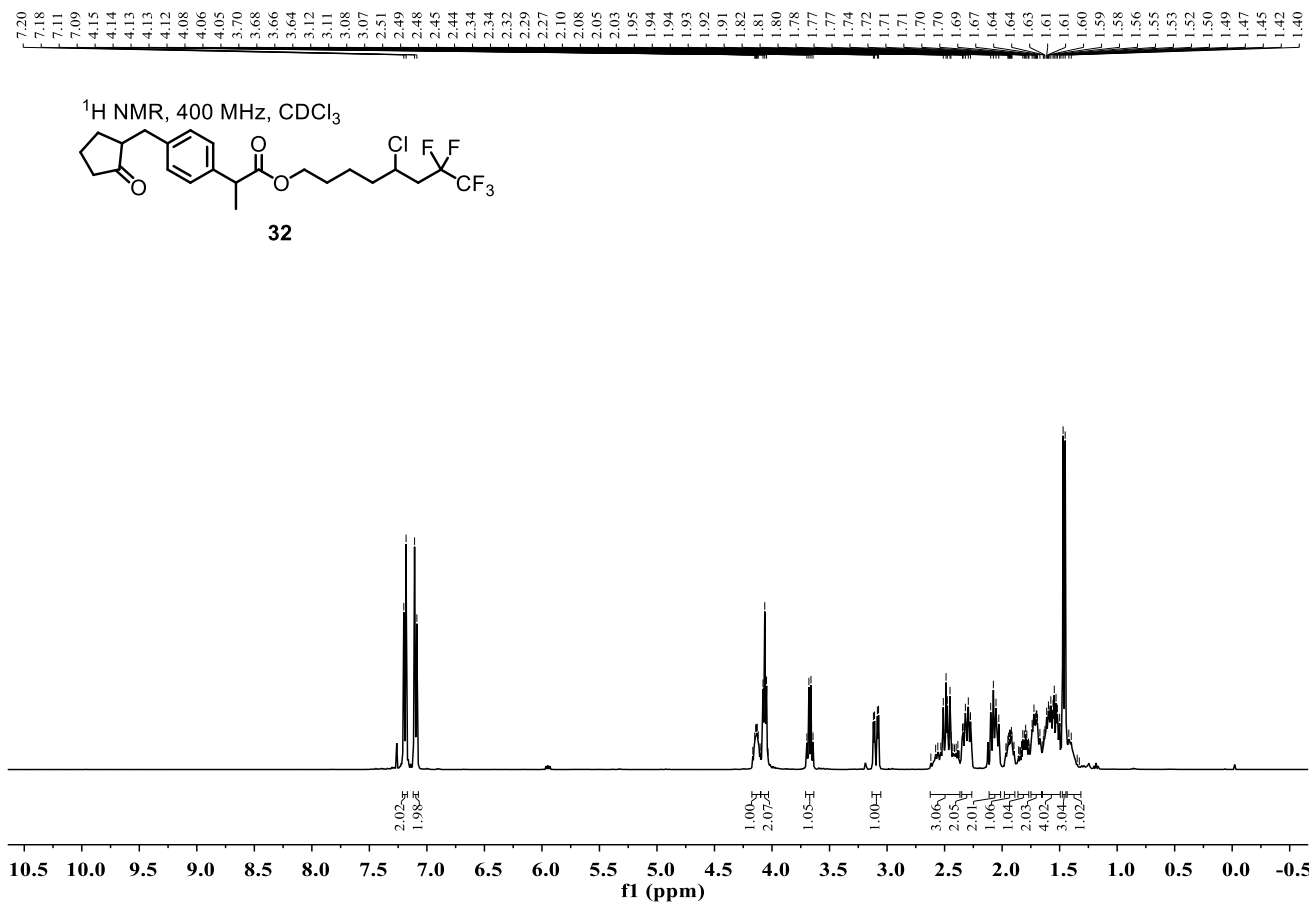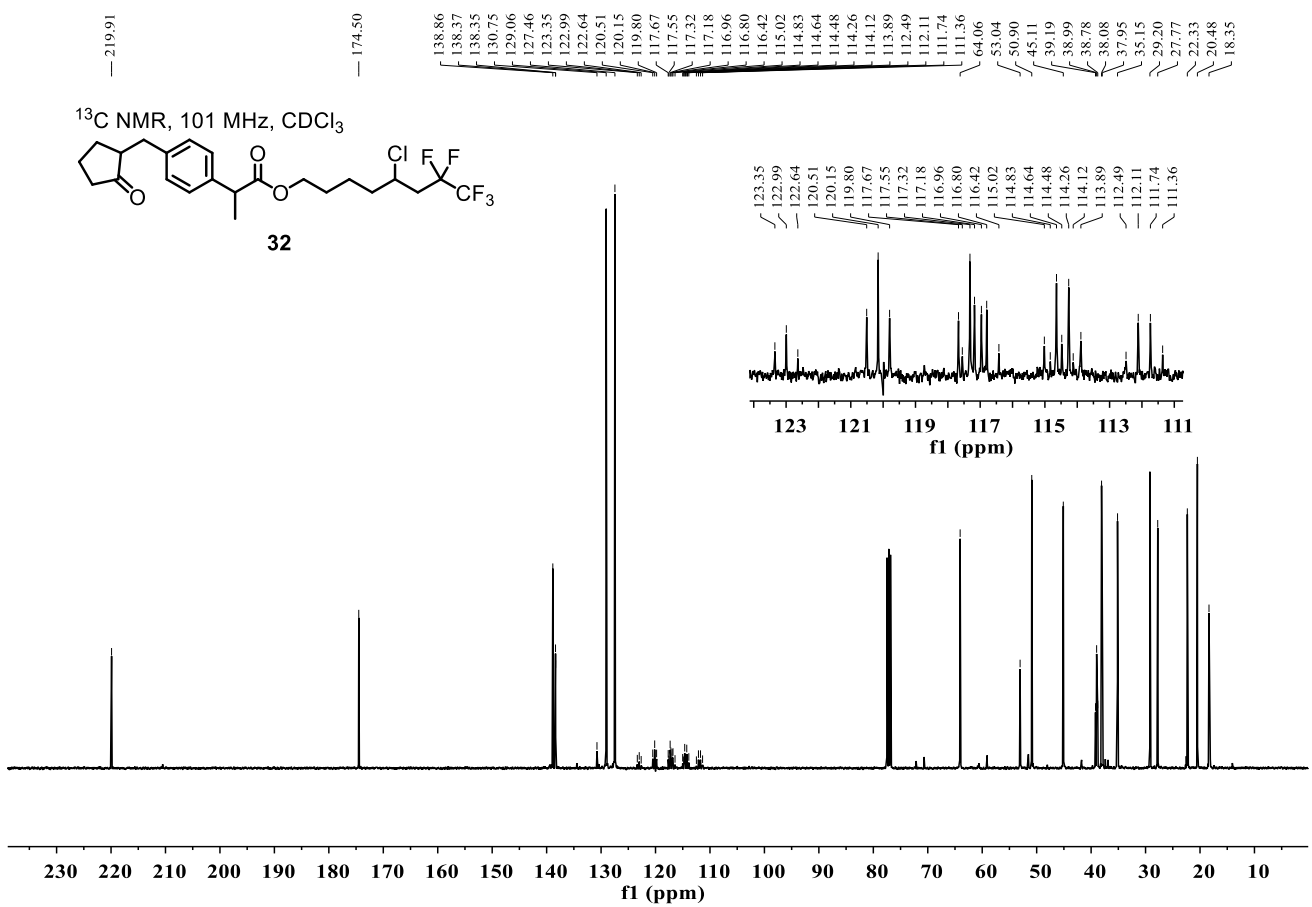

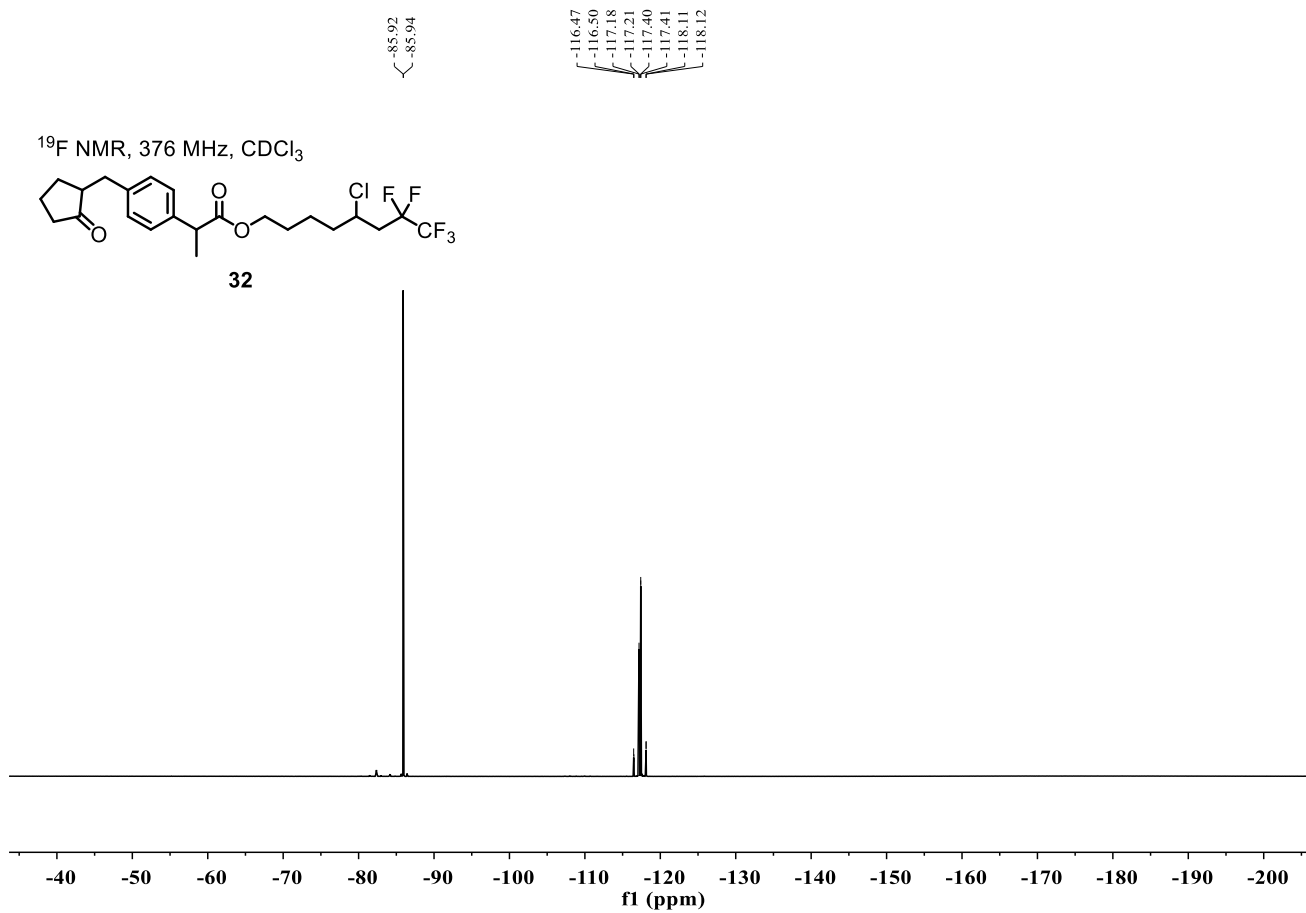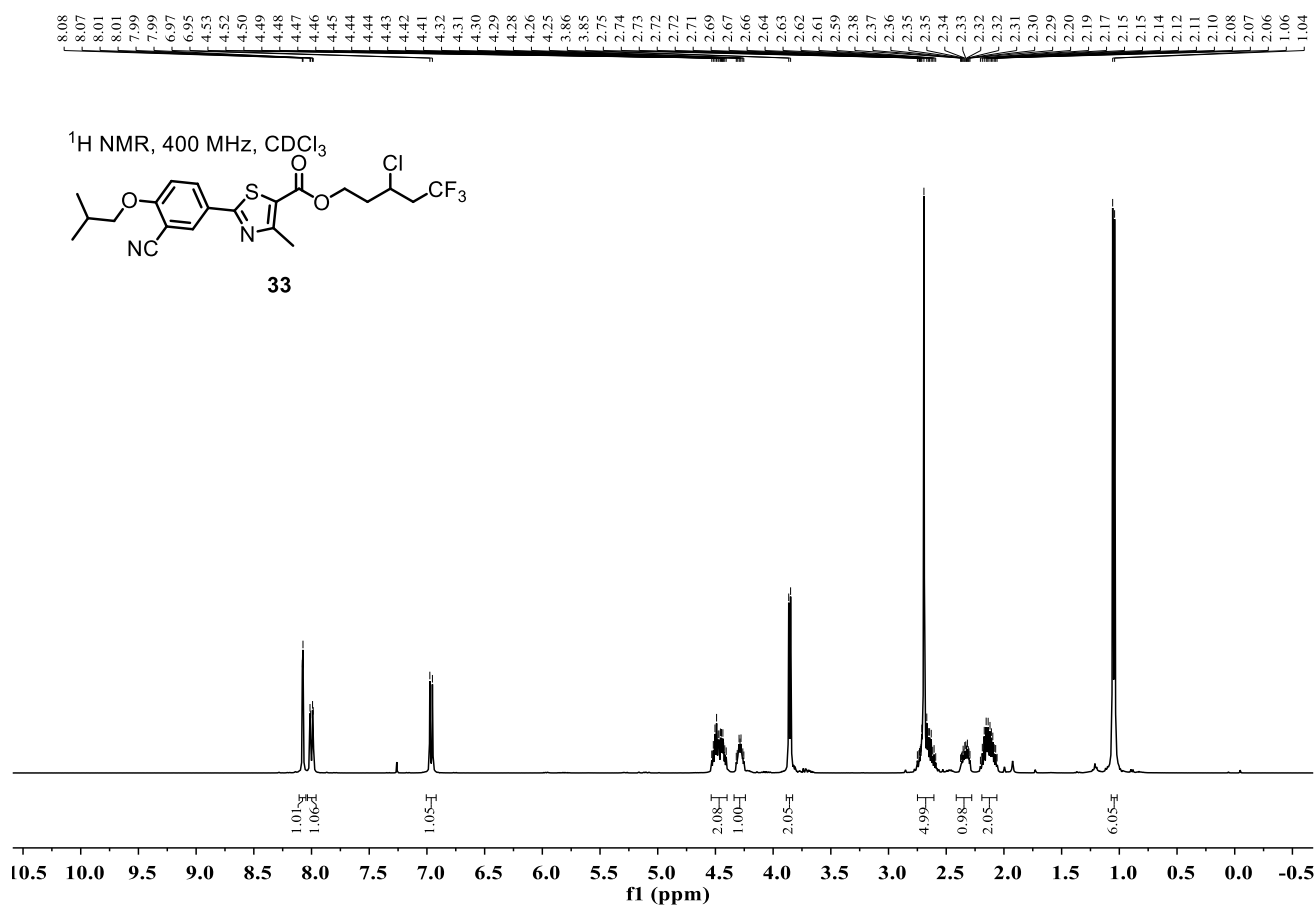



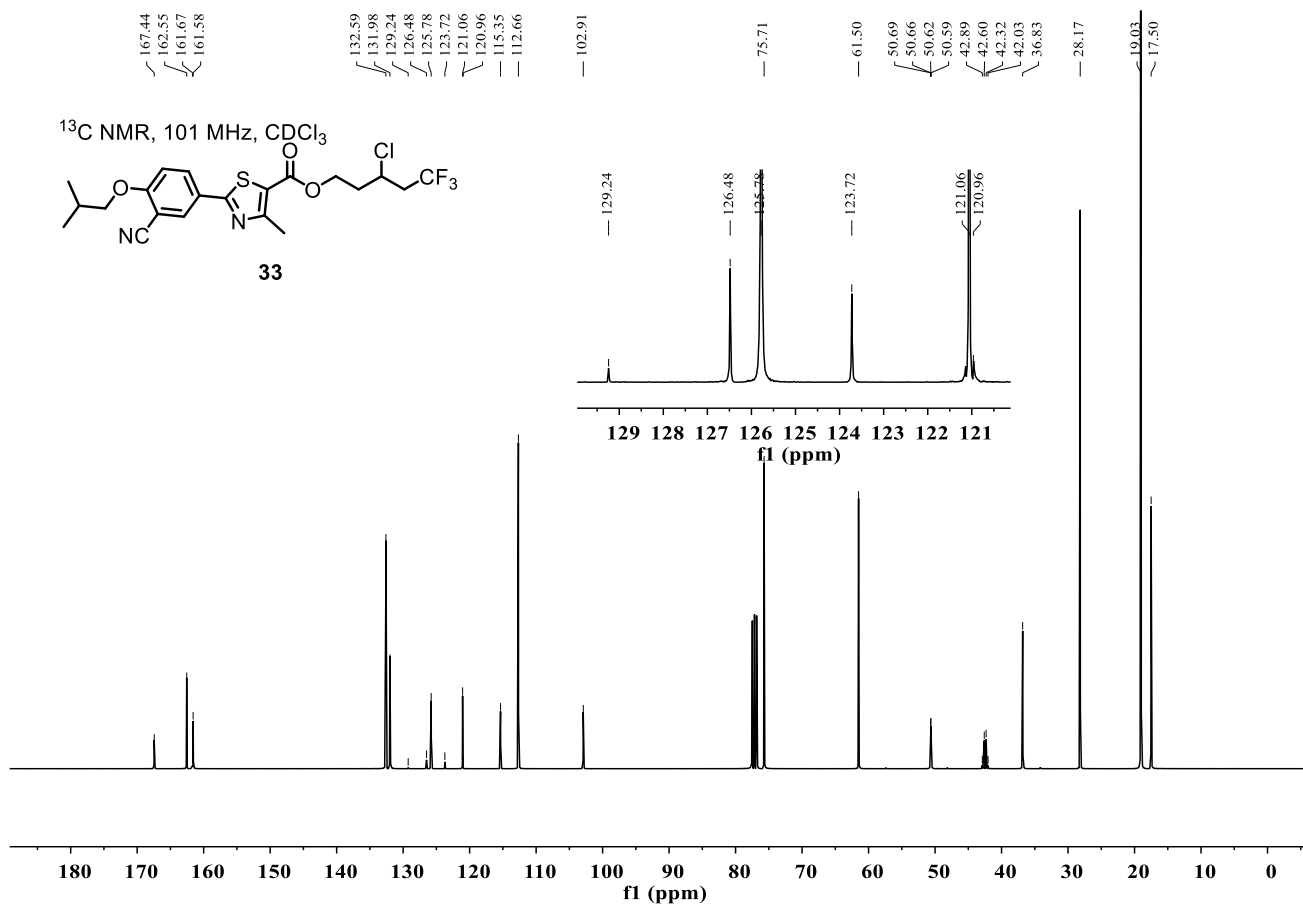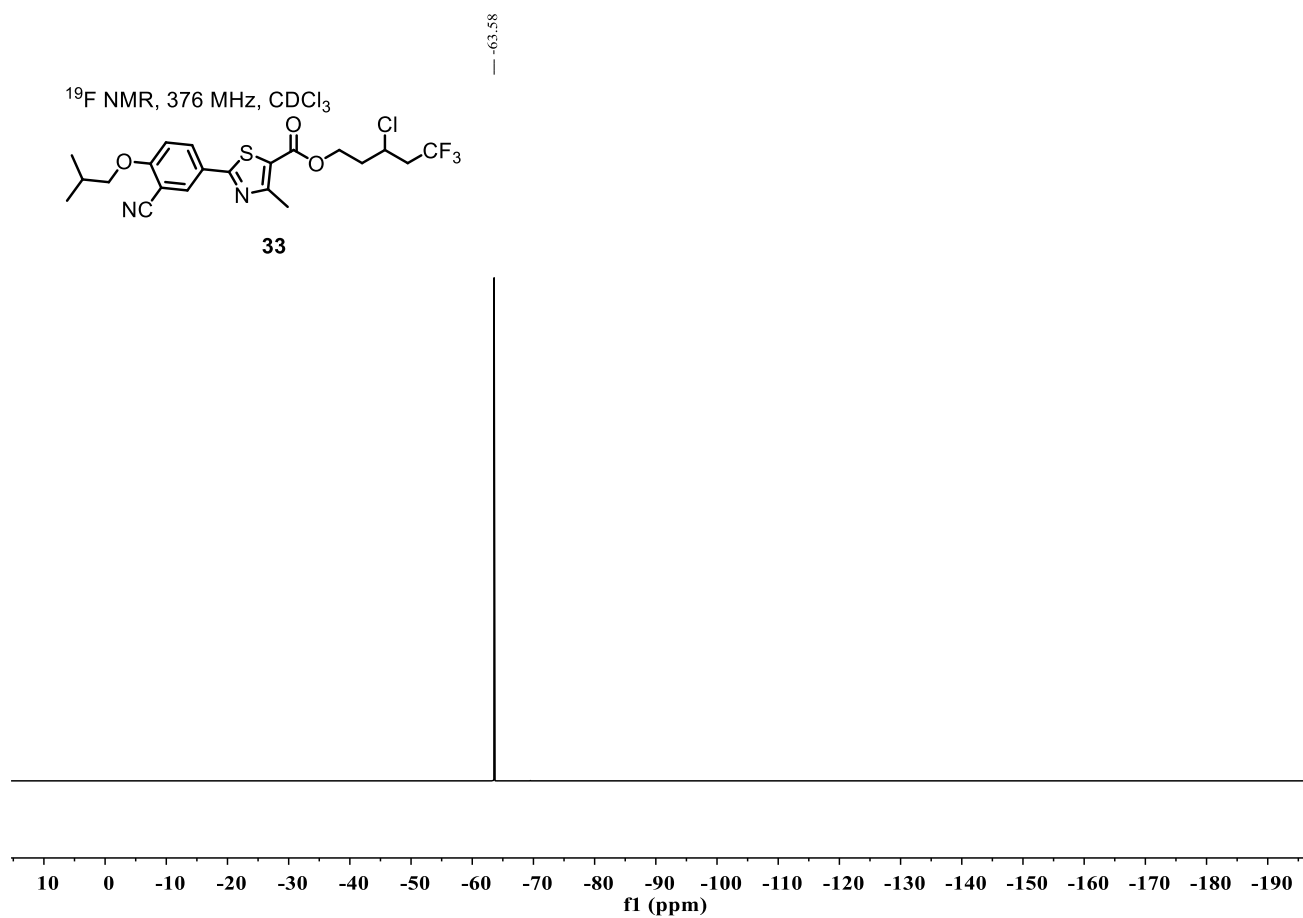

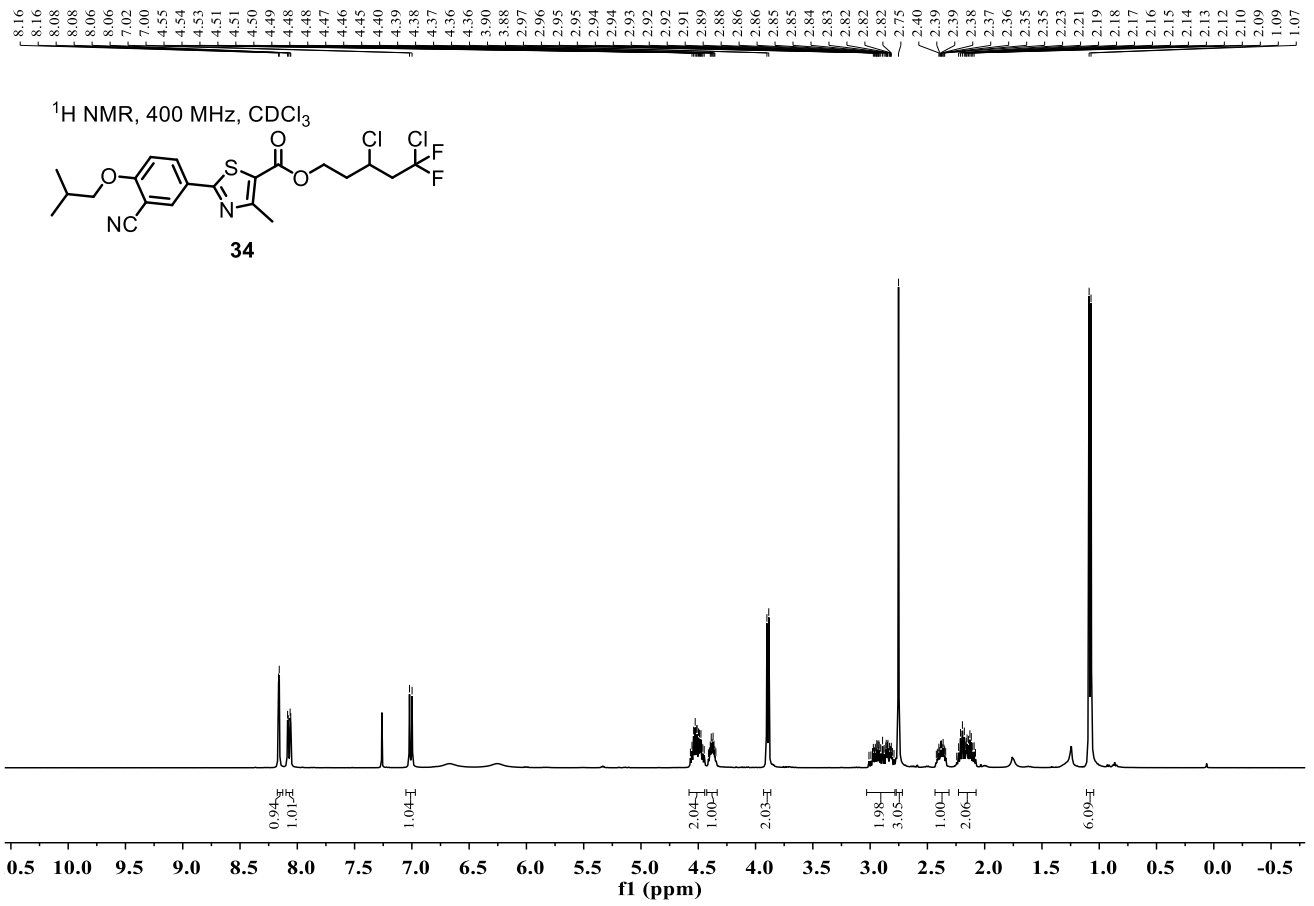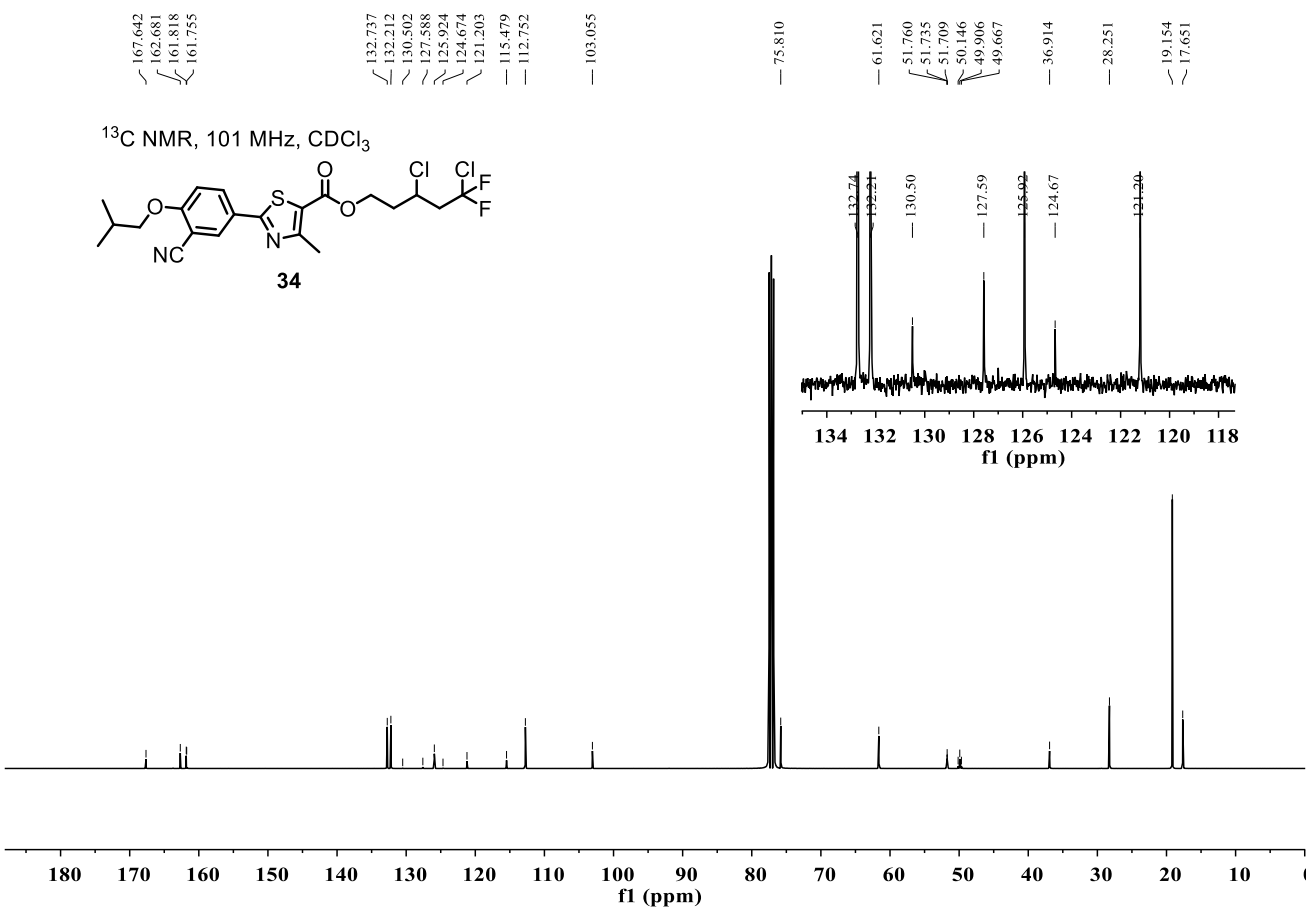

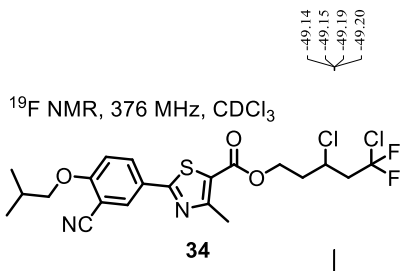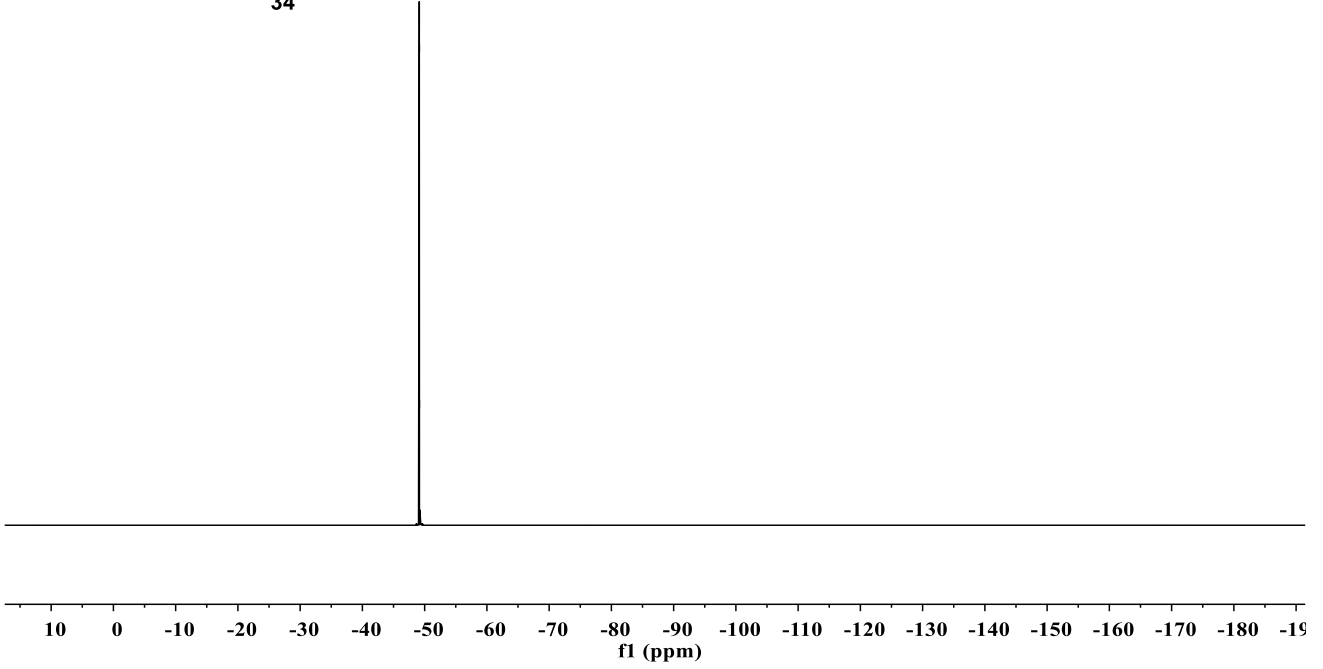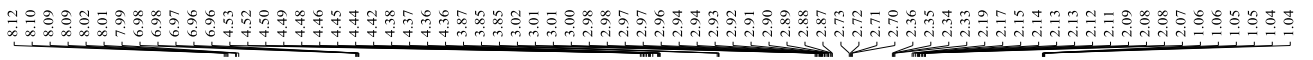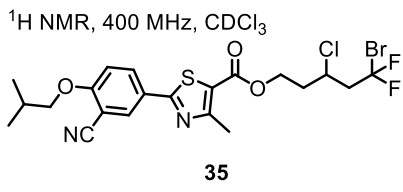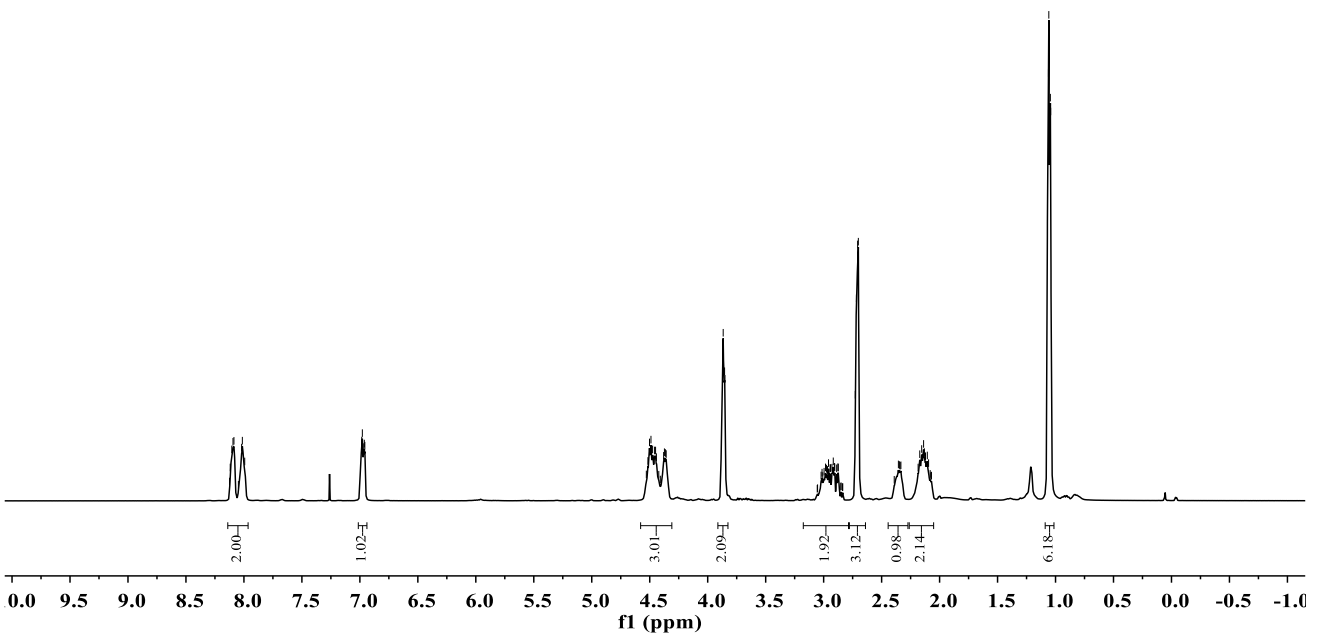

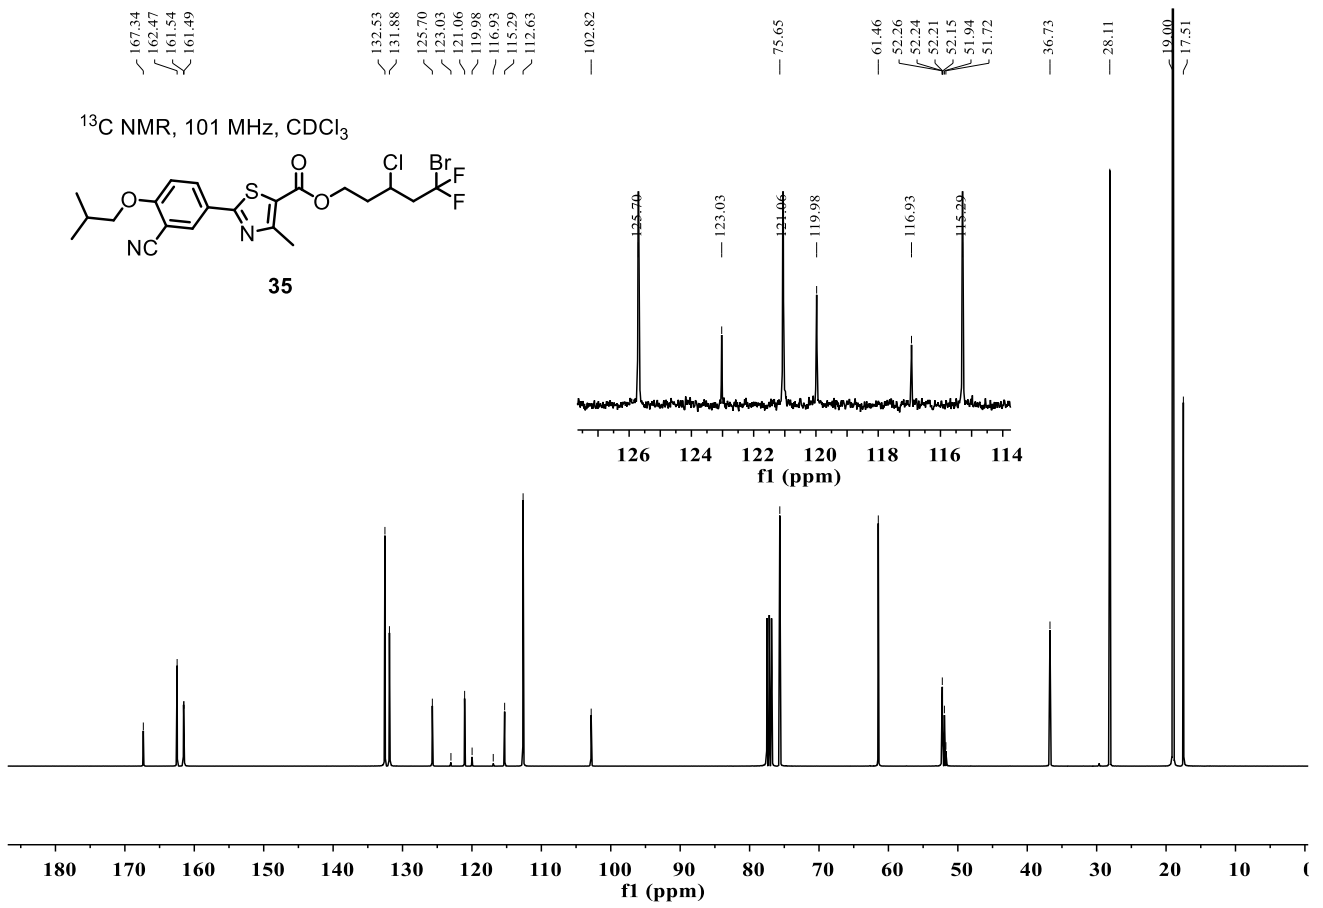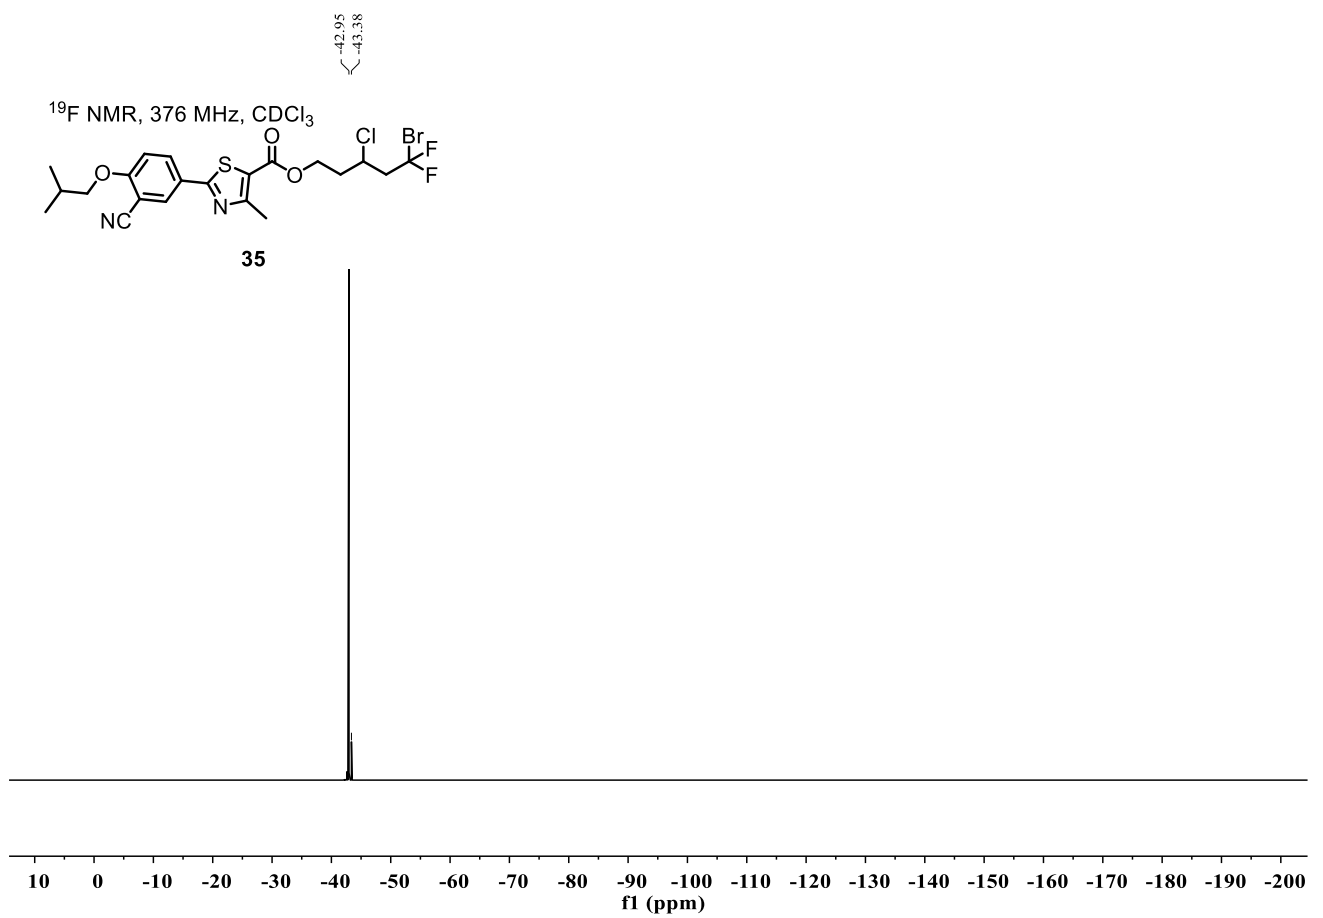

8.083  
8.077  
8.010  
8.004  
7.988  
7.982  
6.976  
6.954  
4.541  
4.527  
4.513  
4.499  
4.484  
4.471  
4.461  
4.449  
4.443  
4.432  
4.421  
4.416  
4.407  
4.399  
4.391  
4.383  
4.375  
4.366  
3.863  
3.847  
2.695  
2.668  
2.645  
2.635  
2.630  
2.620  
2.609  
2.596  
2.581  
2.574  
2.558  
2.550  
2.533  
2.519  
2.510  
2.495  
2.417  
2.409  
2.403  
2.396  
2.388  
2.381  
2.373  
2.366  
2.359  
2.351  
2.345  
2.337  
2.203  
2.187  
2.170  
2.154  
2.144  
2.137  
2.132  
2.120  
2.107  
2.095  
2.083  
1.056  
1.039

<sup>1</sup>H NMR, 400 MHz, CDCl<sub>3</sub>

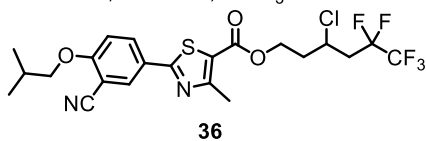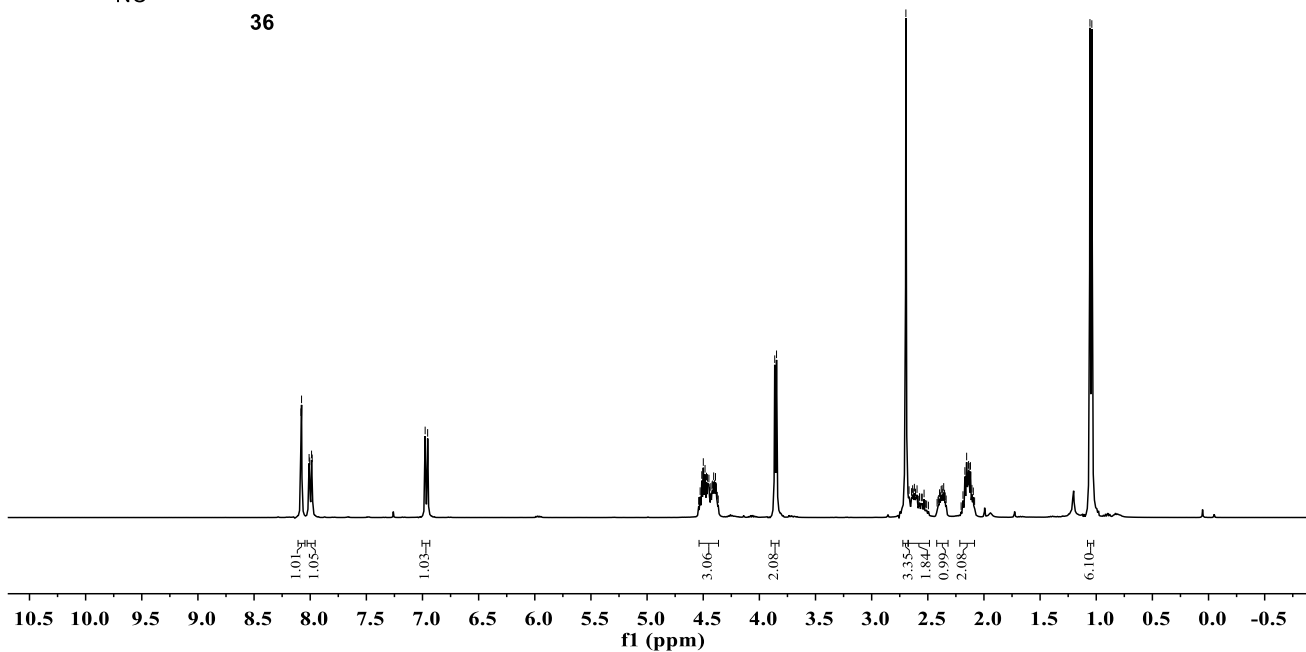

167.27  
162.45  
161.53  
161.44  
132.46  
131.78  
125.67  
123.30  
122.94  
122.59  
120.98  
120.46  
120.10  
119.75  
117.62  
117.48  
117.26  
117.10  
116.91  
116.72  
116.34  
115.24  
114.94  
114.78  
114.57  
114.43  
114.19  
114.07  
113.81  
112.59  
112.41  
112.03  
111.66  
111.28  
102.78  
75.63  
61.45  
49.85  
39.30  
39.10  
38.89  
37.26  
28.10  
18.90  
17.37

<sup>13</sup>C NMR, 101 MHz, CDCl<sub>3</sub>

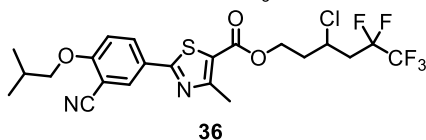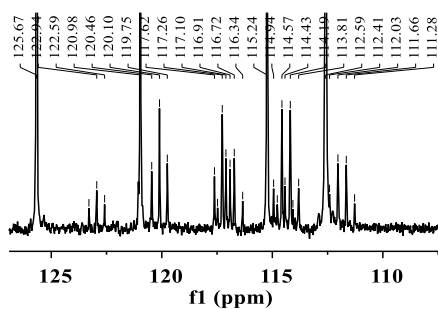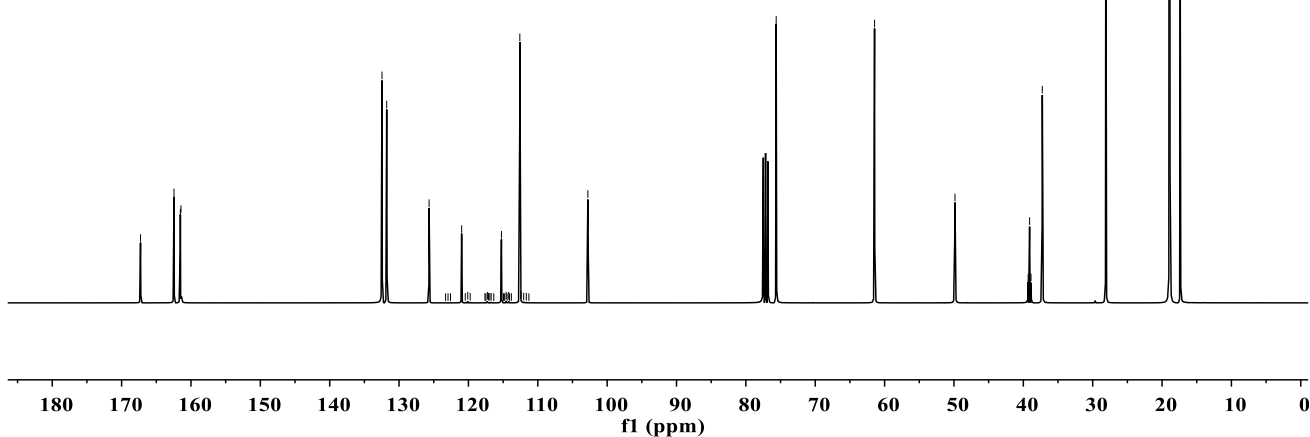

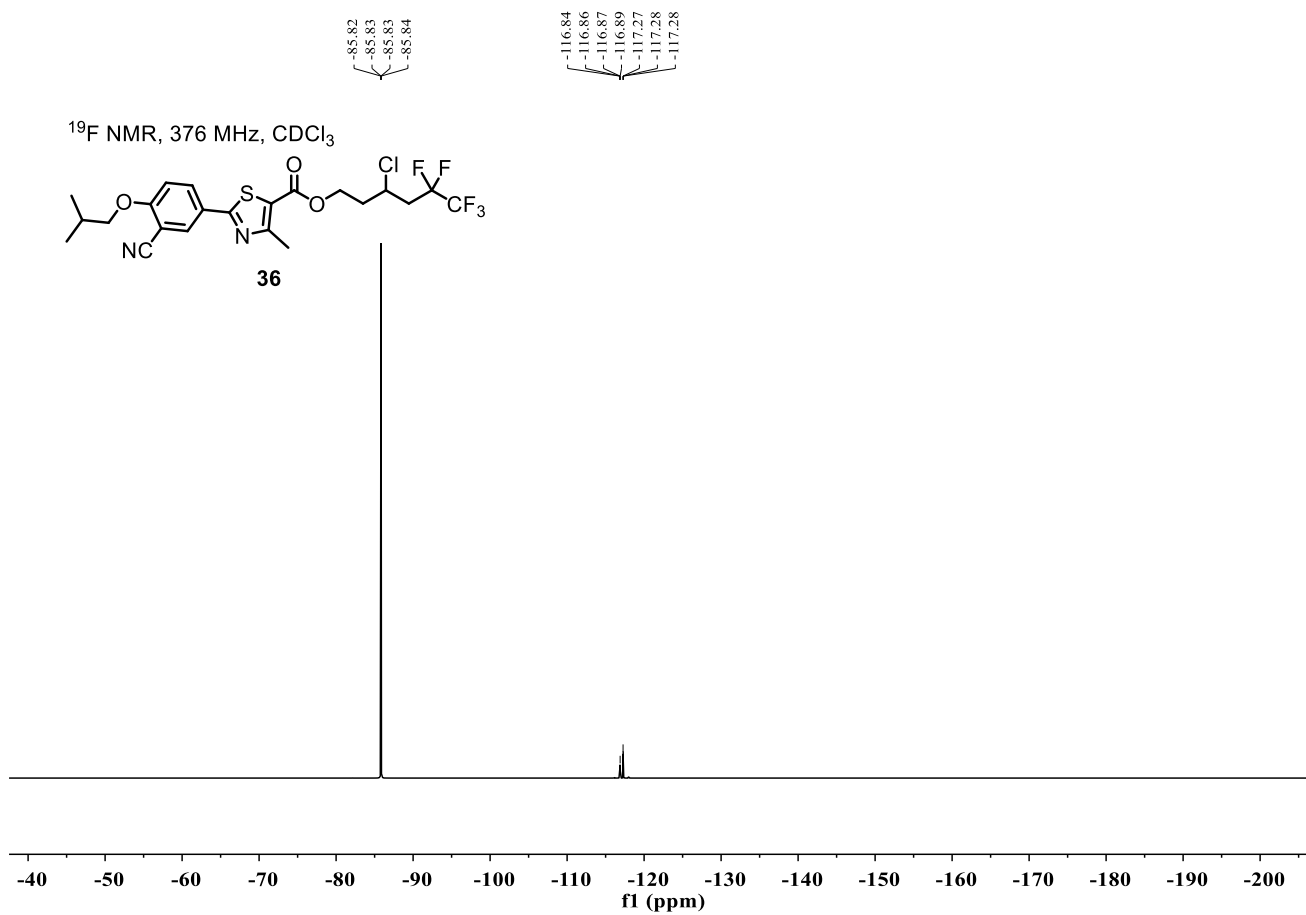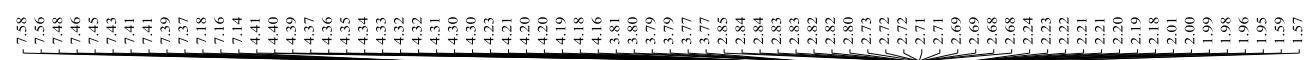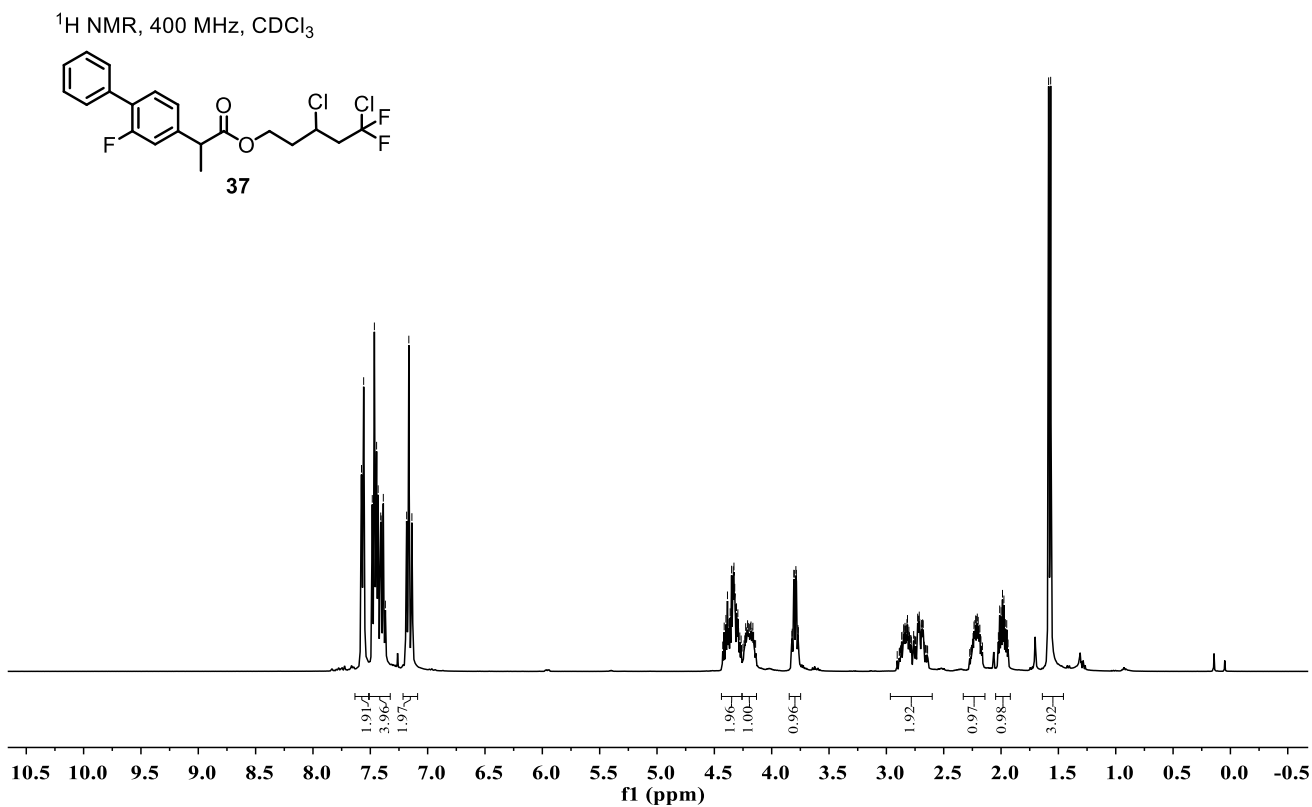

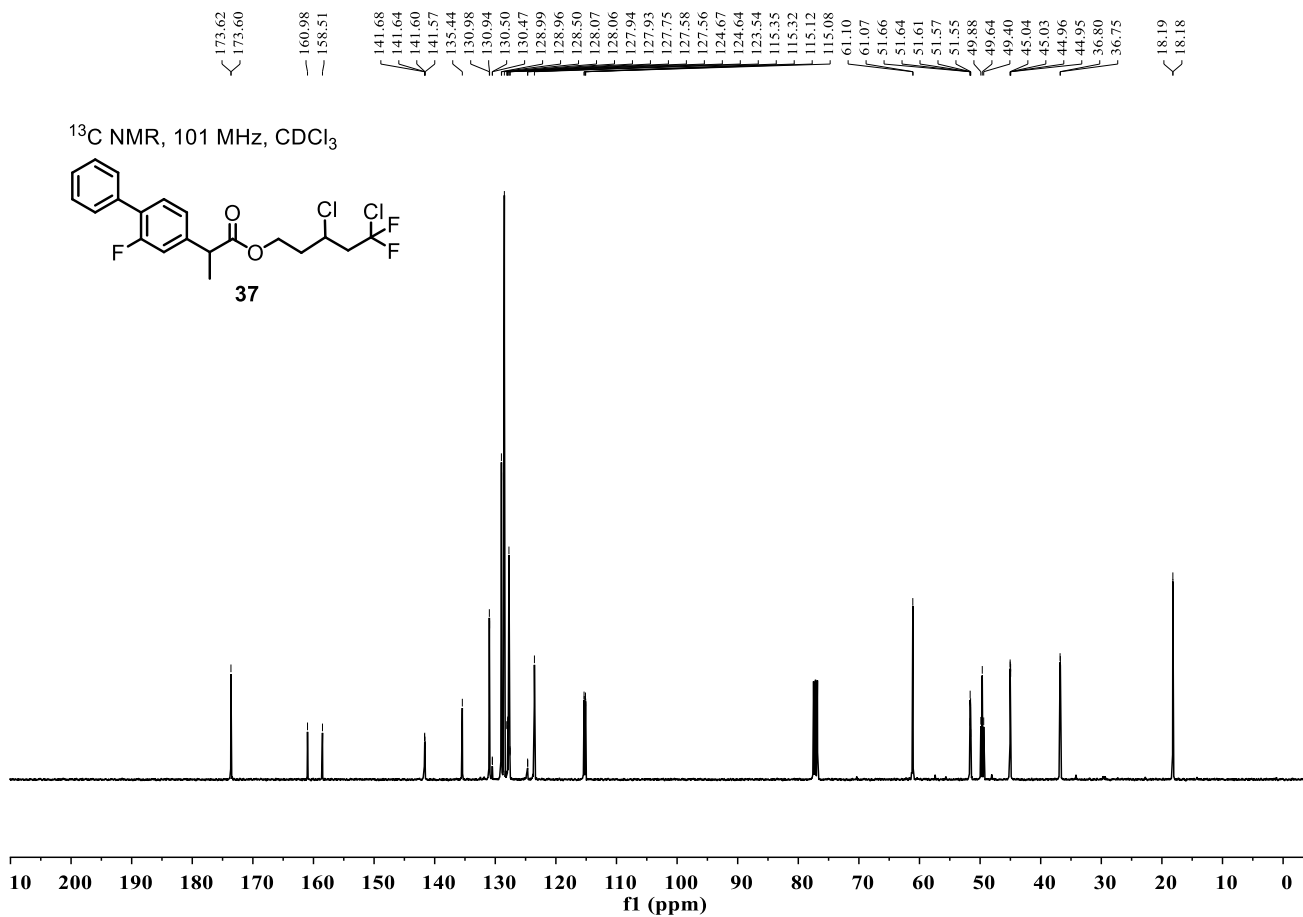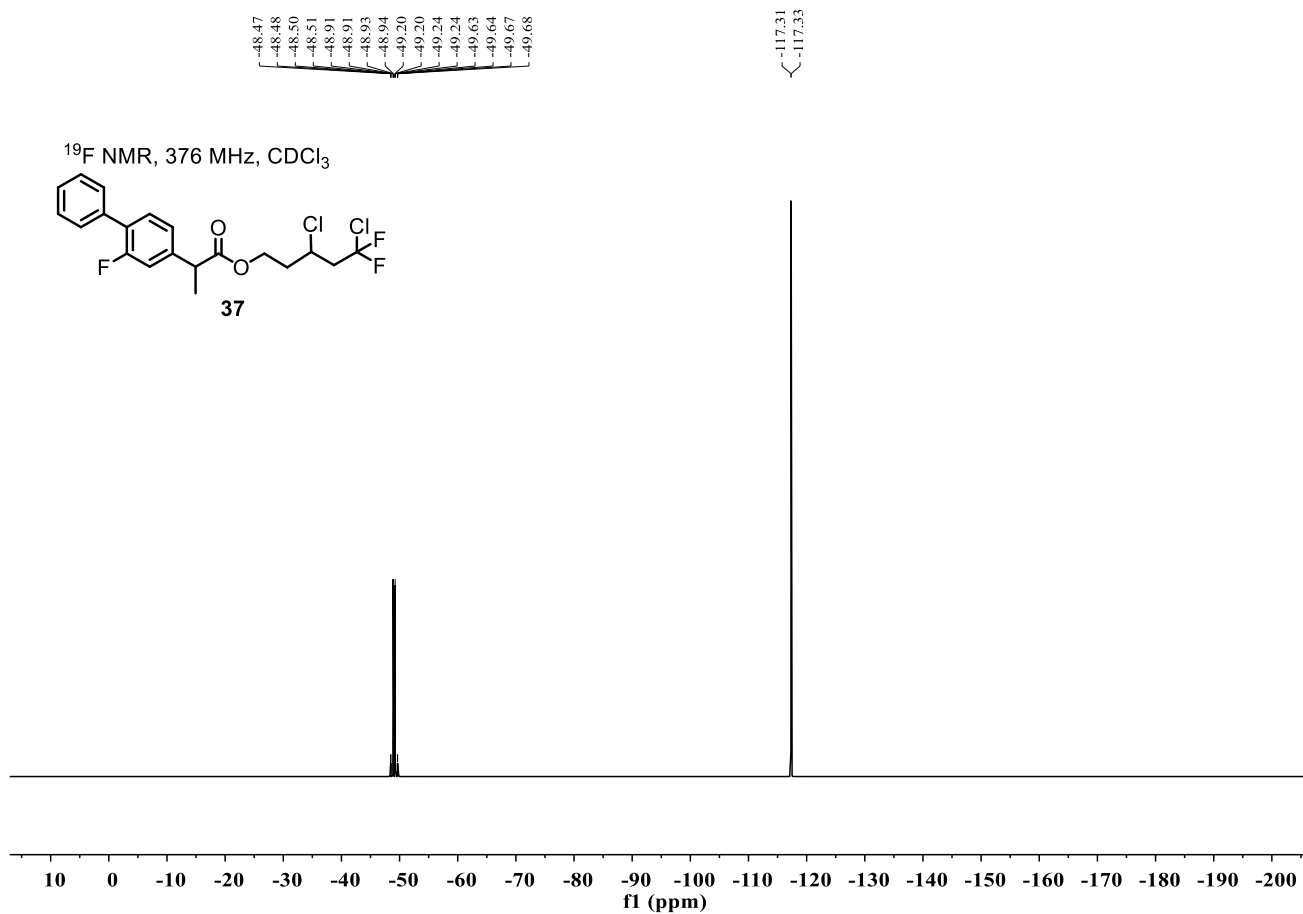

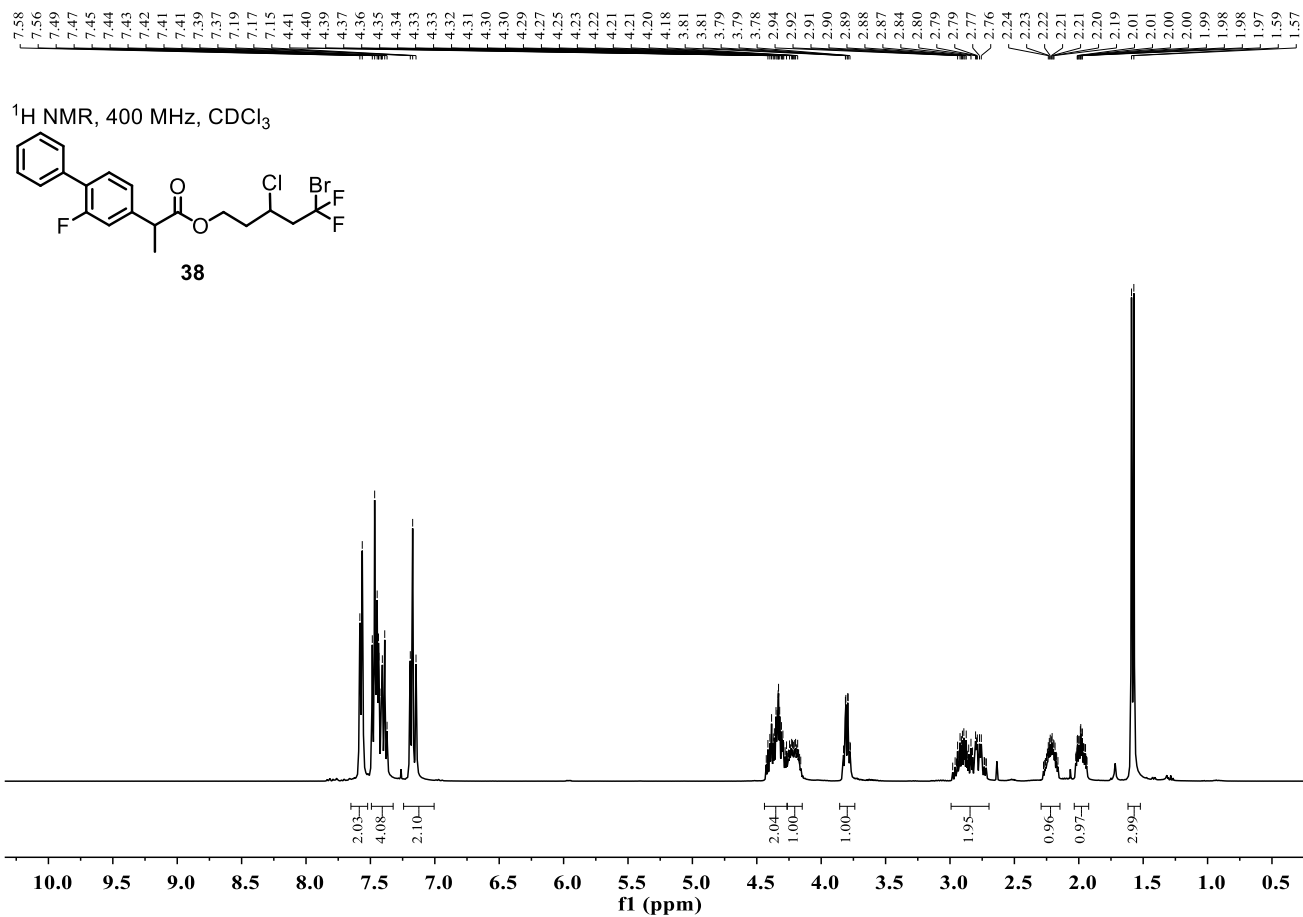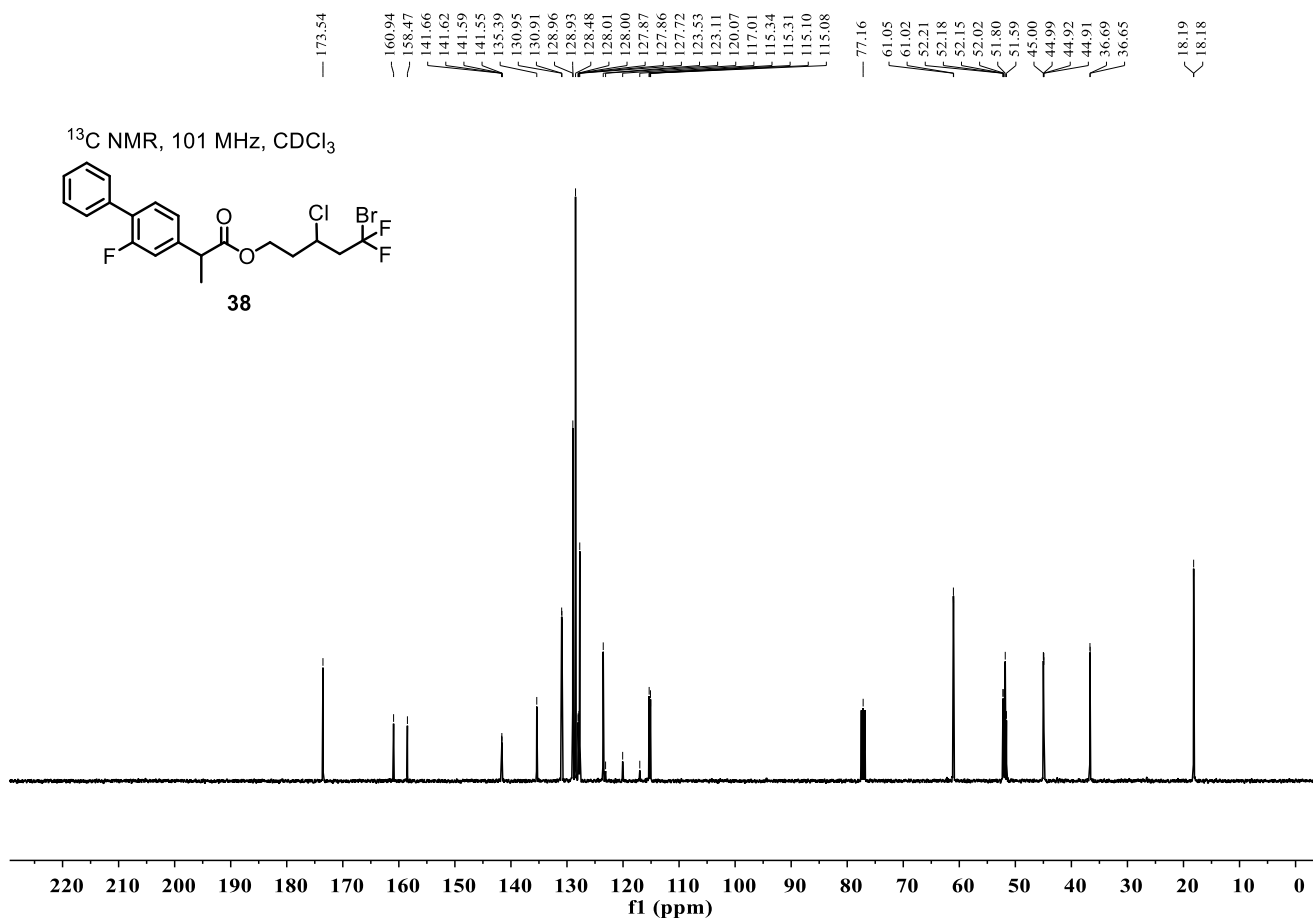



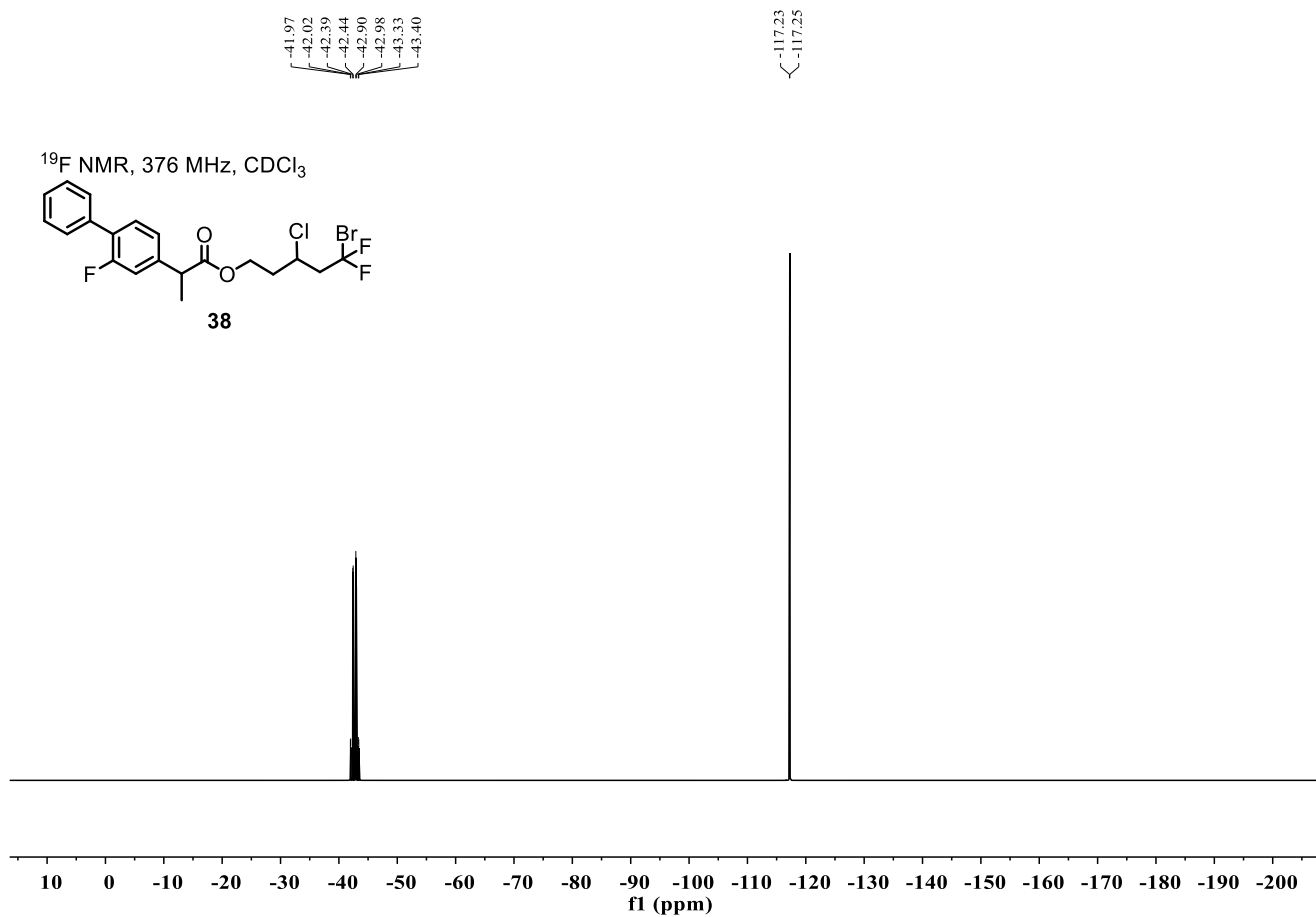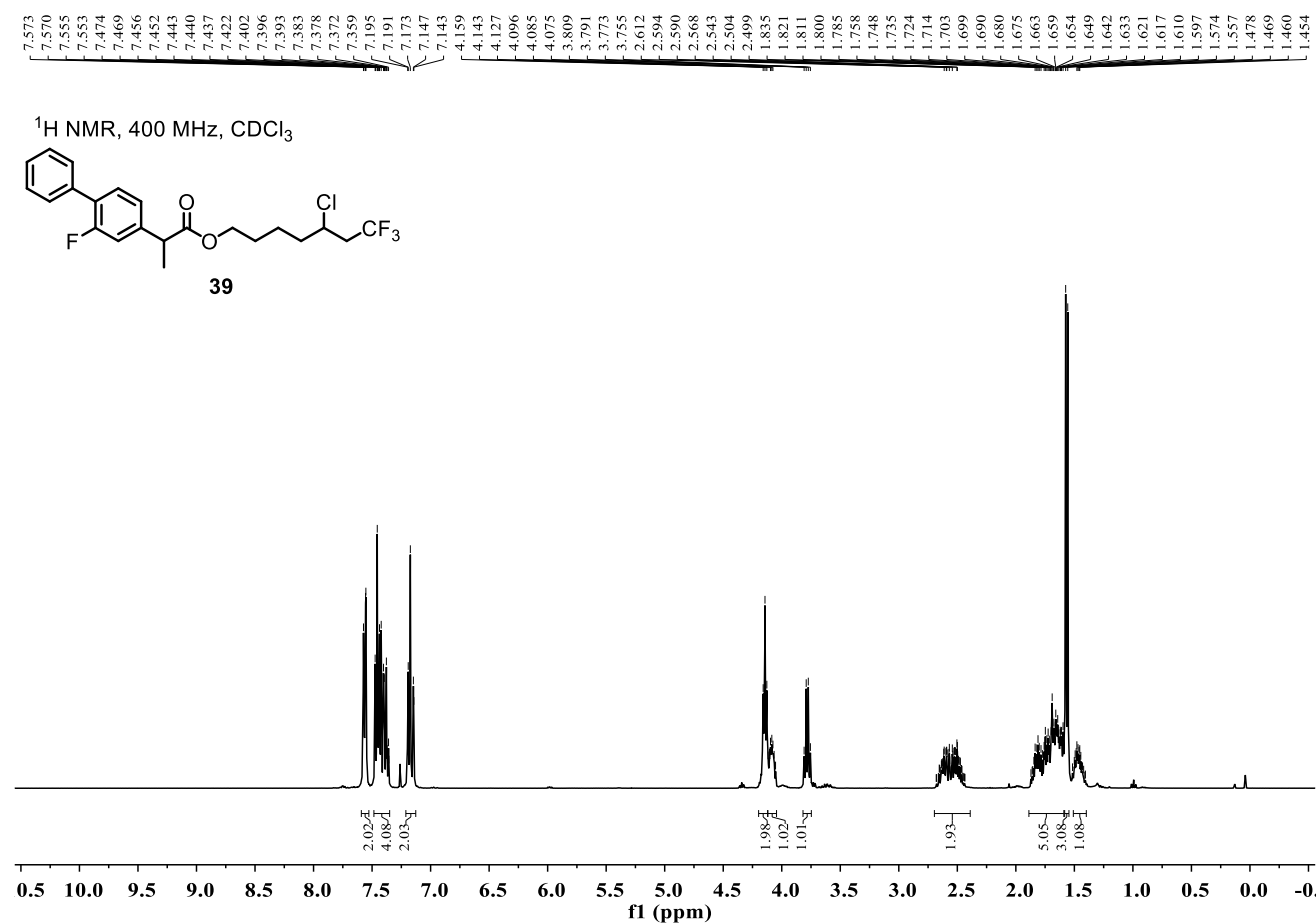

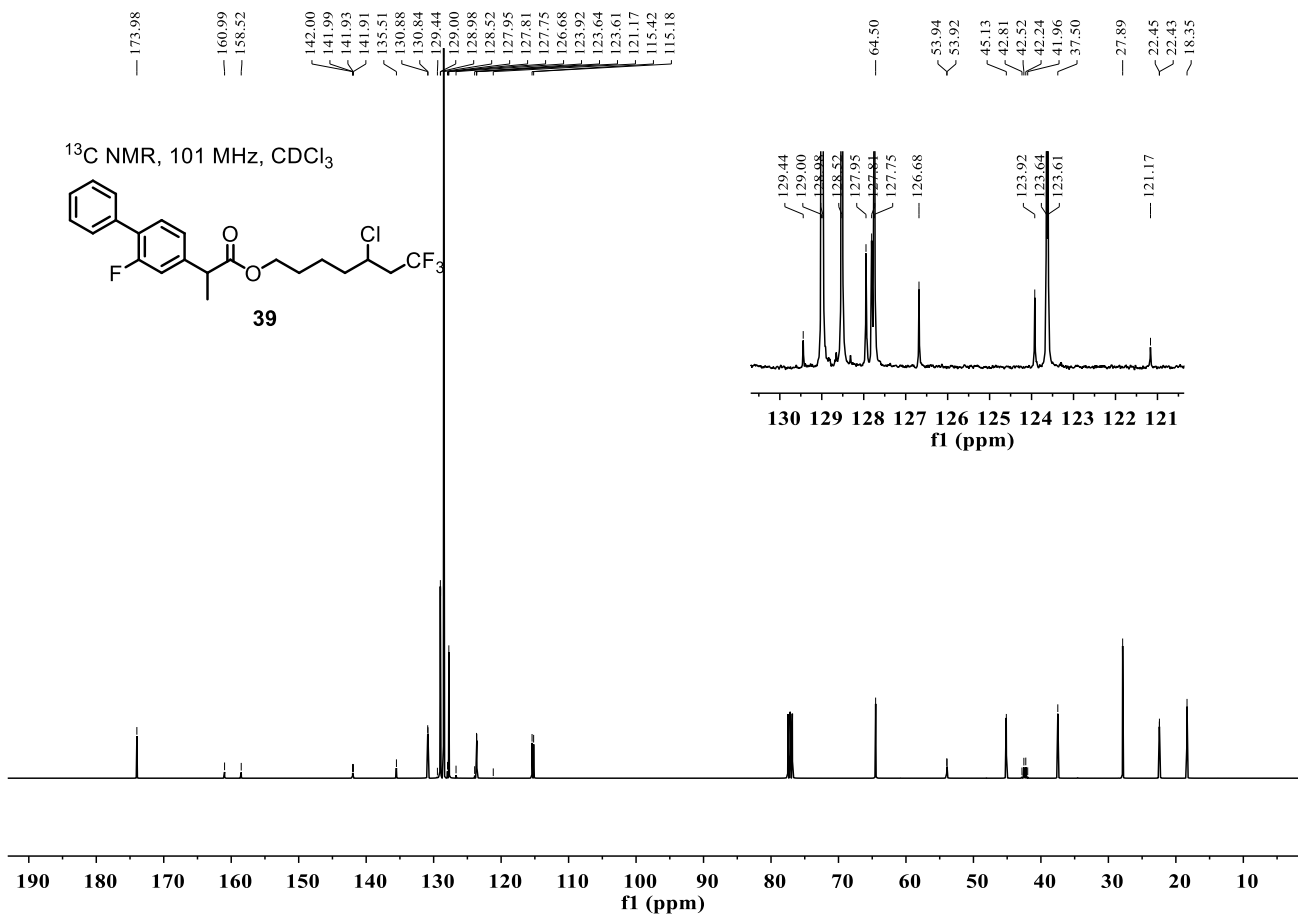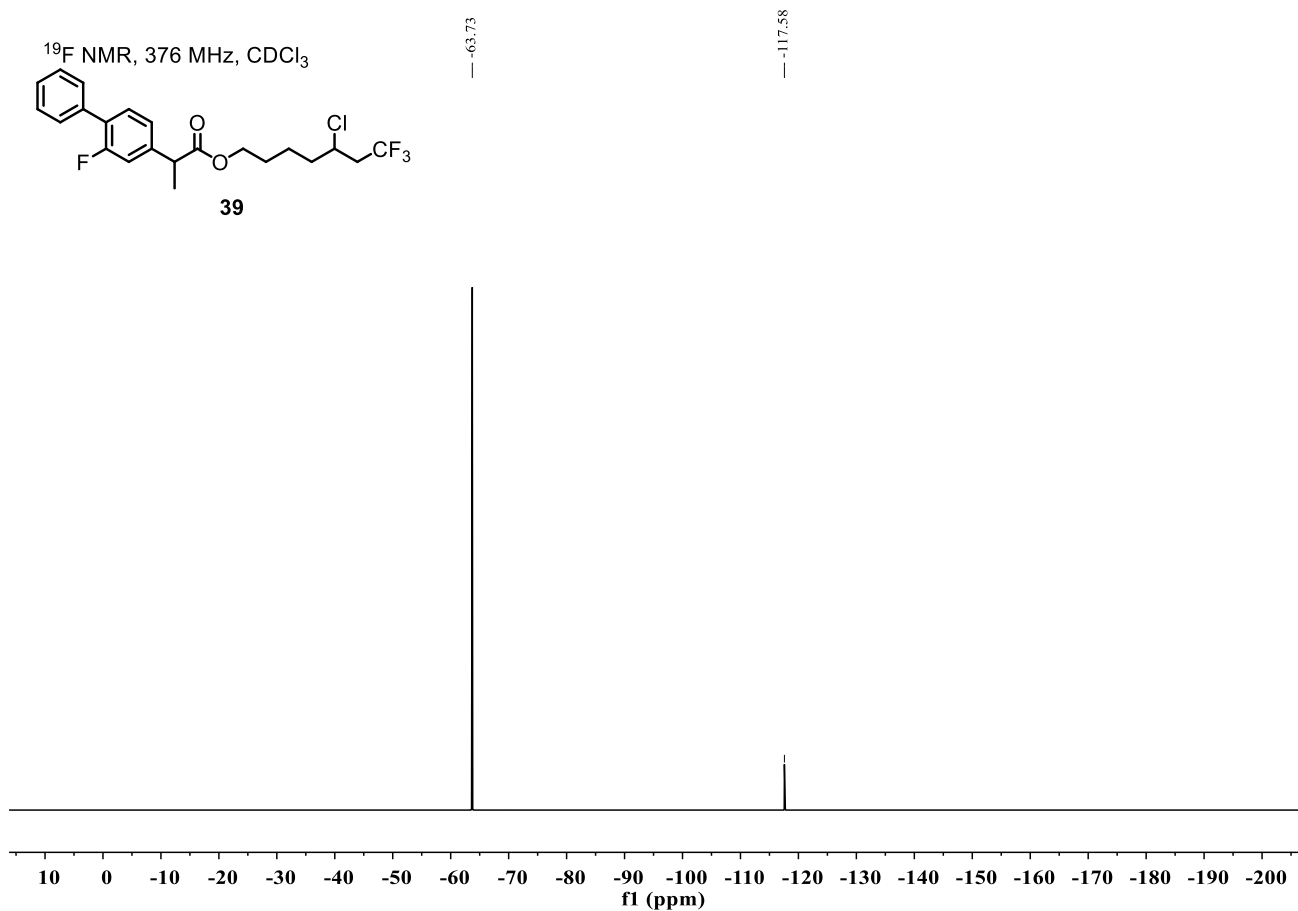

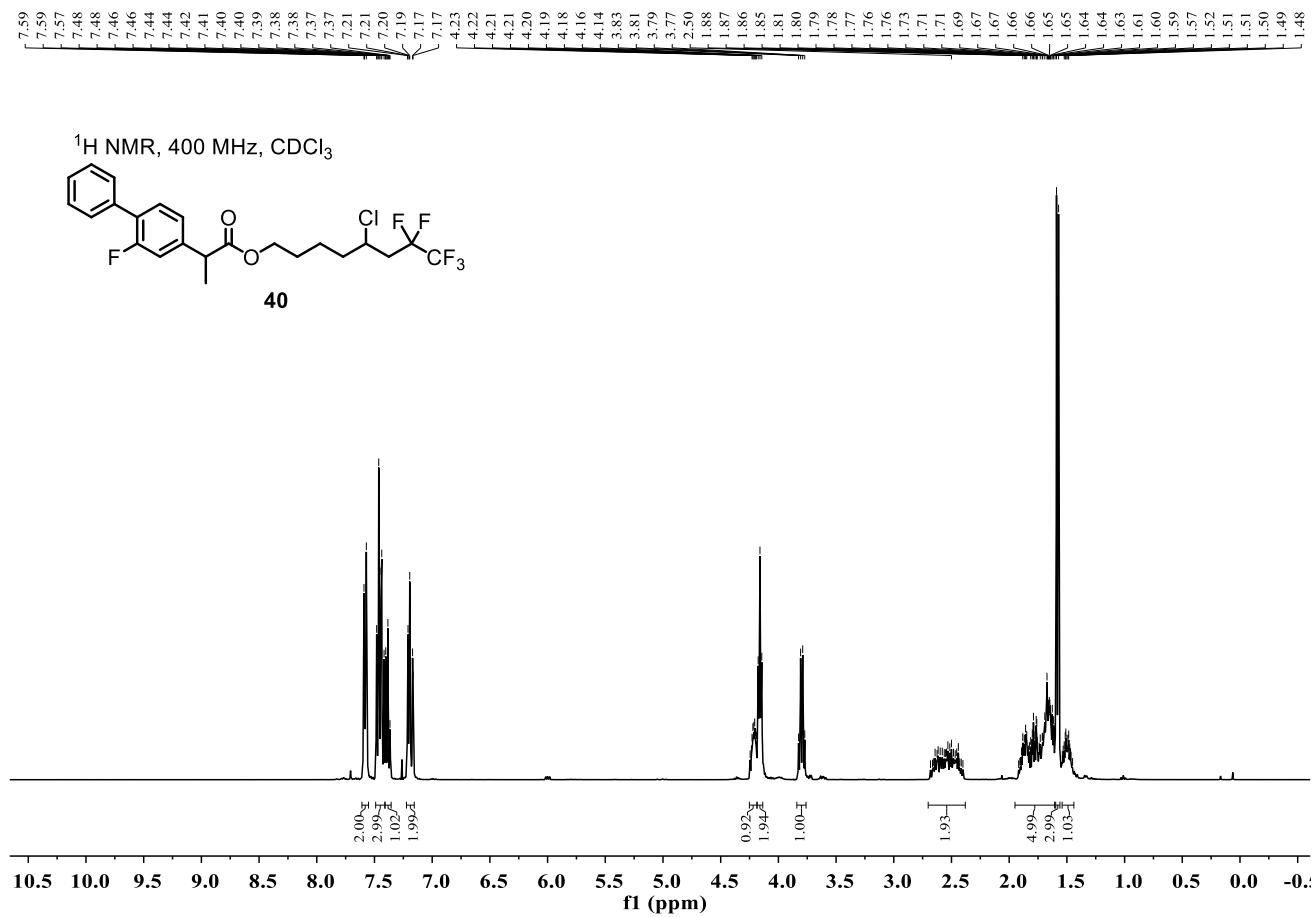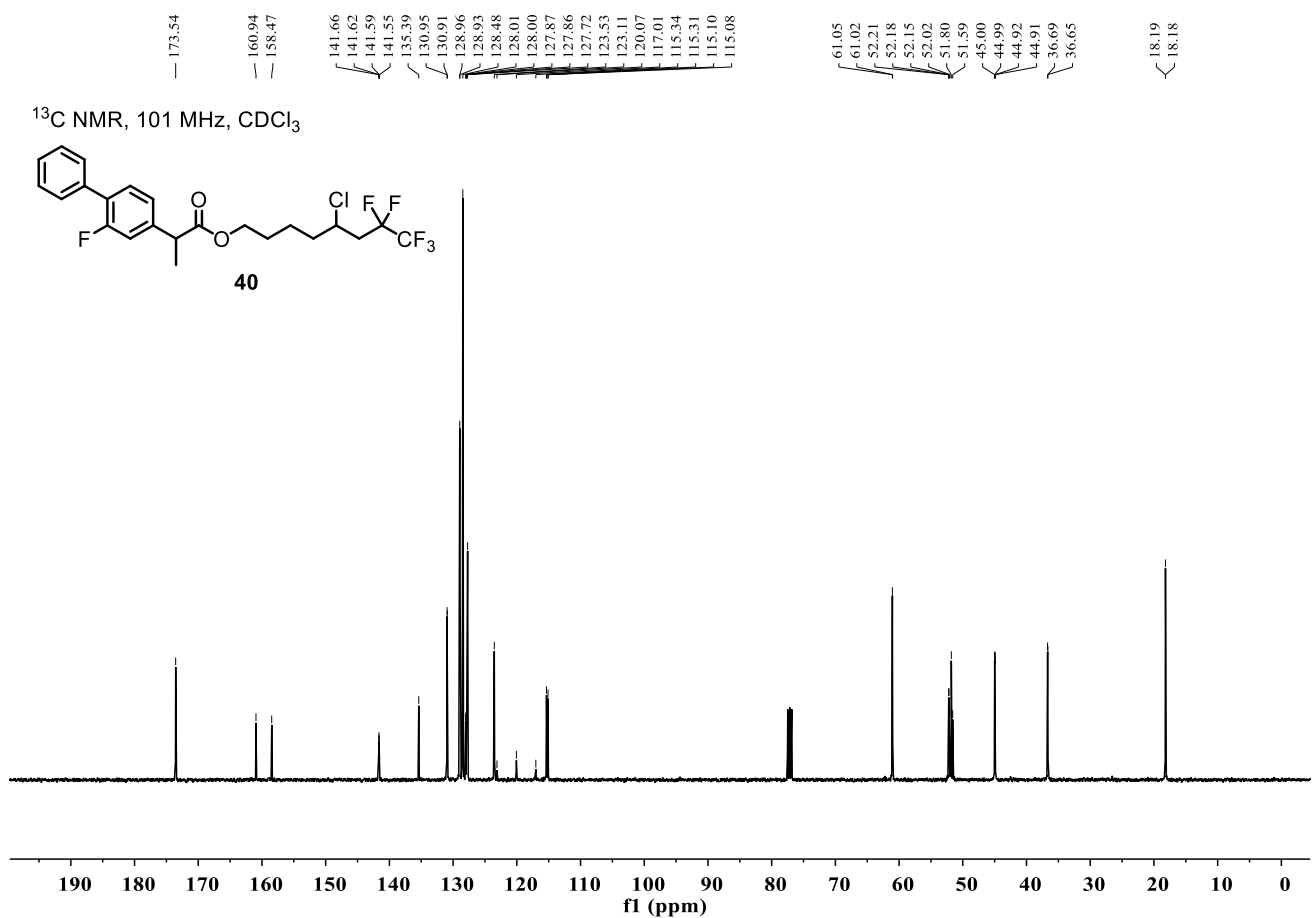

<sup>19</sup>F NMR, 376 MHz, CDCl<sub>3</sub>

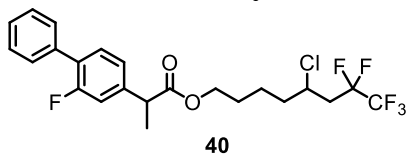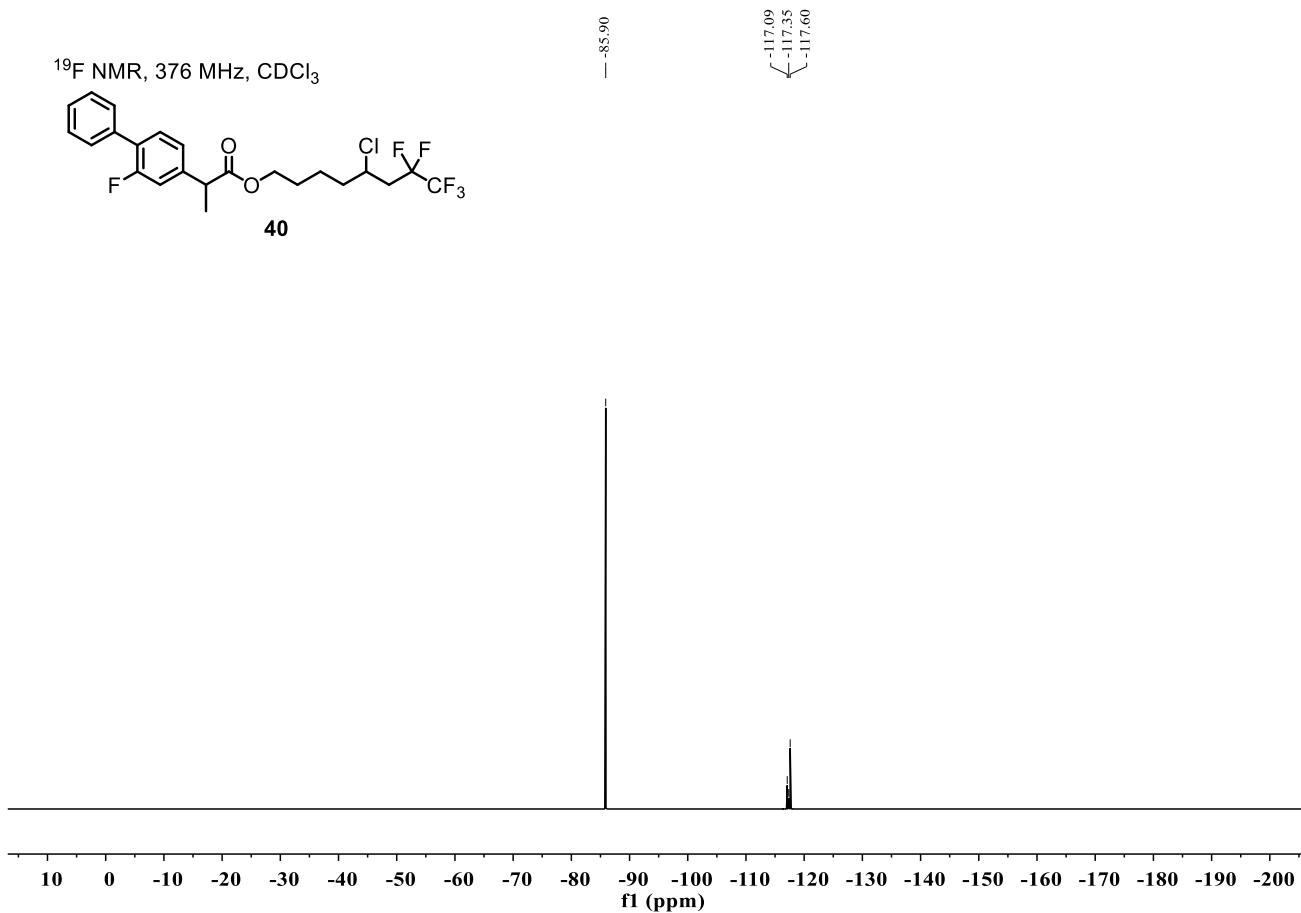

<sup>1</sup>H NMR, 400 MHz, CDCl<sub>3</sub>

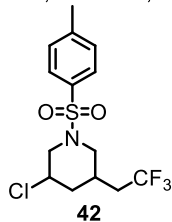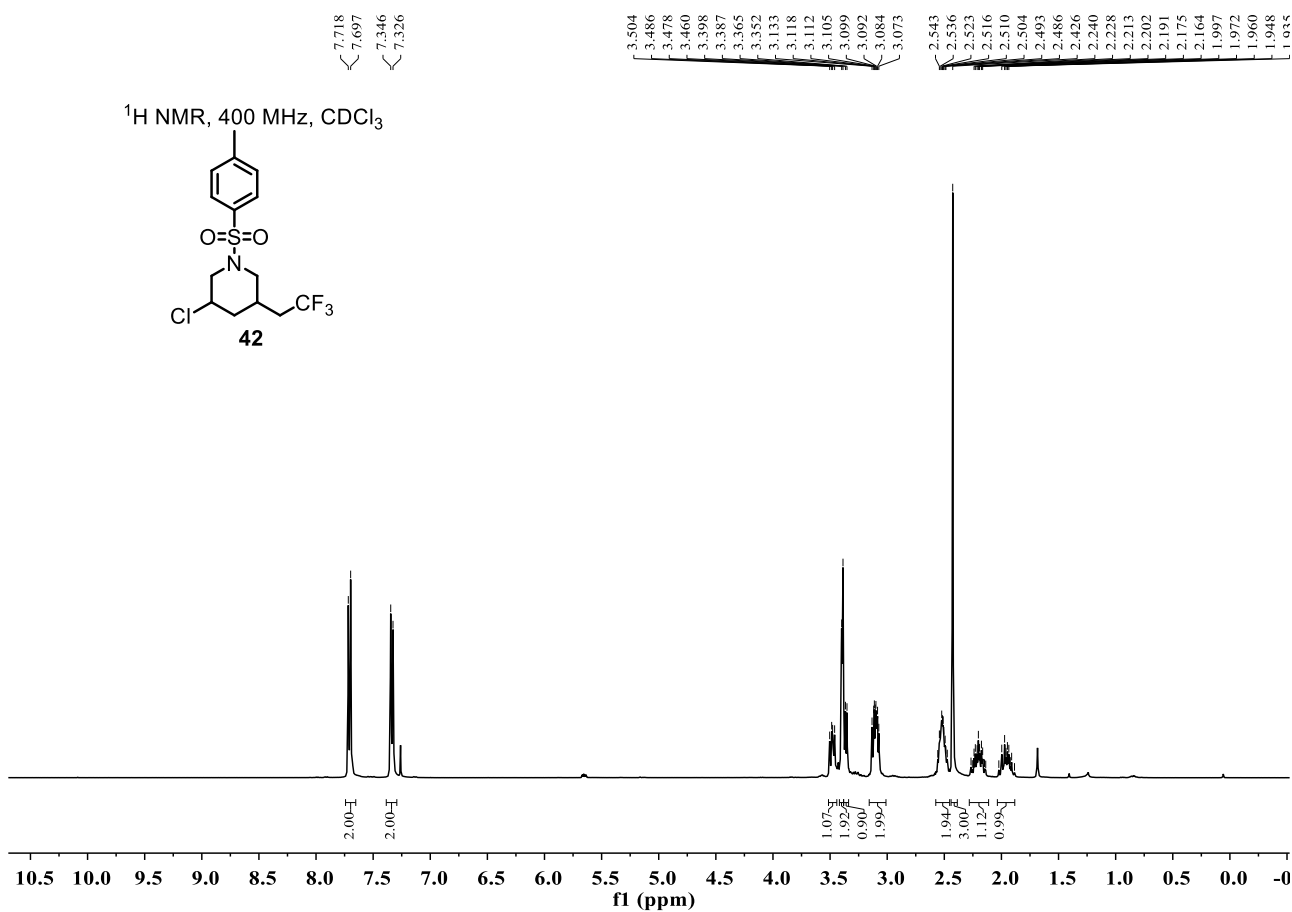

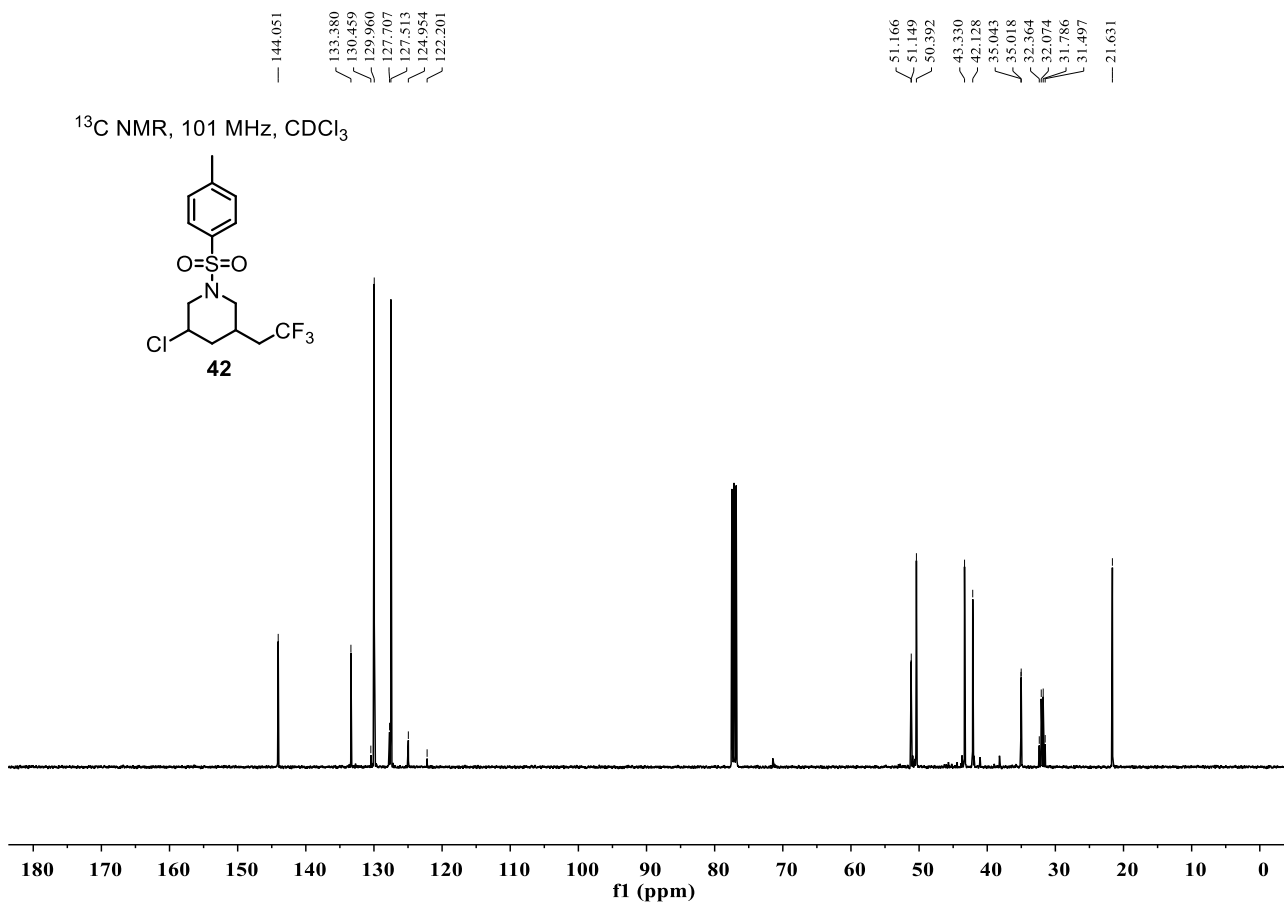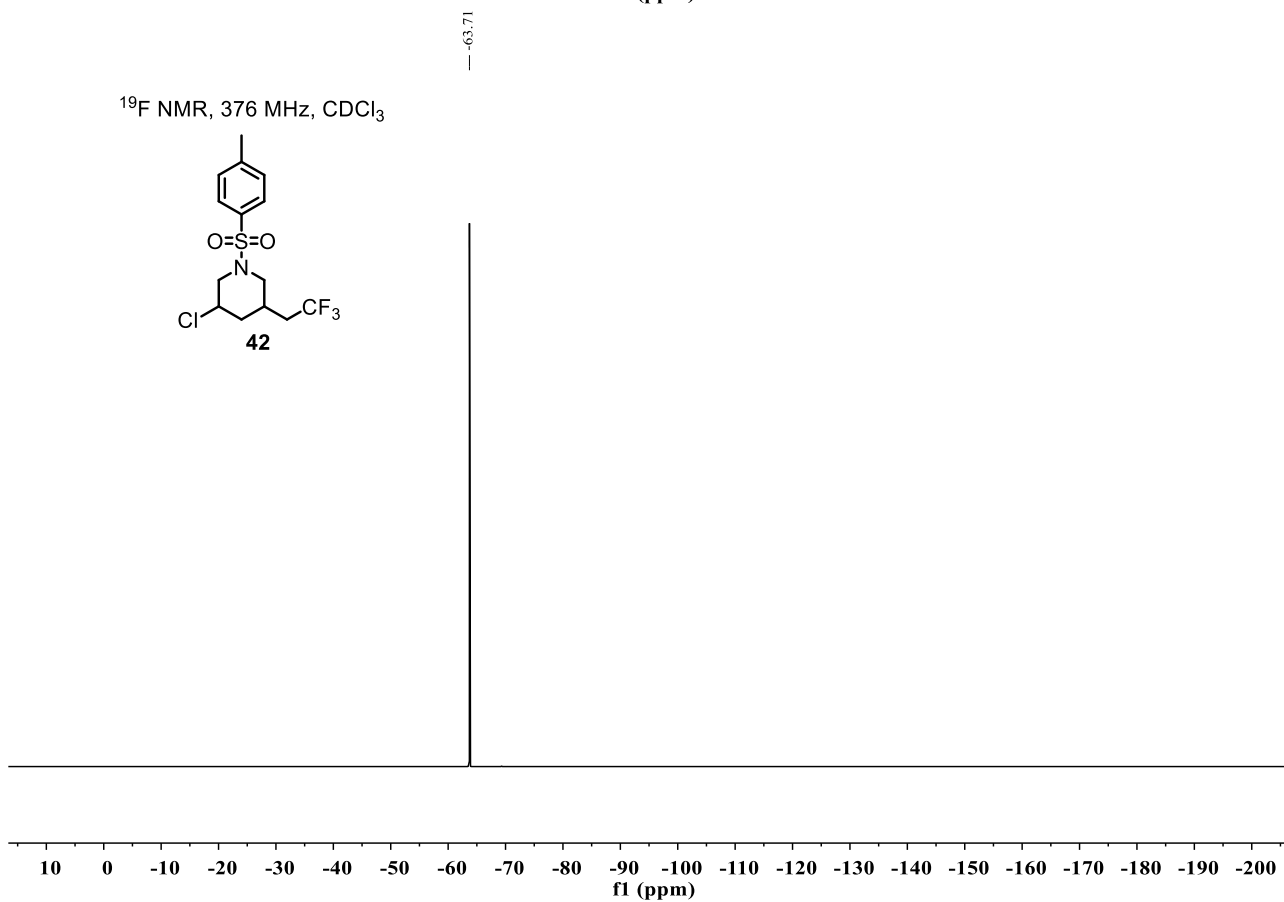

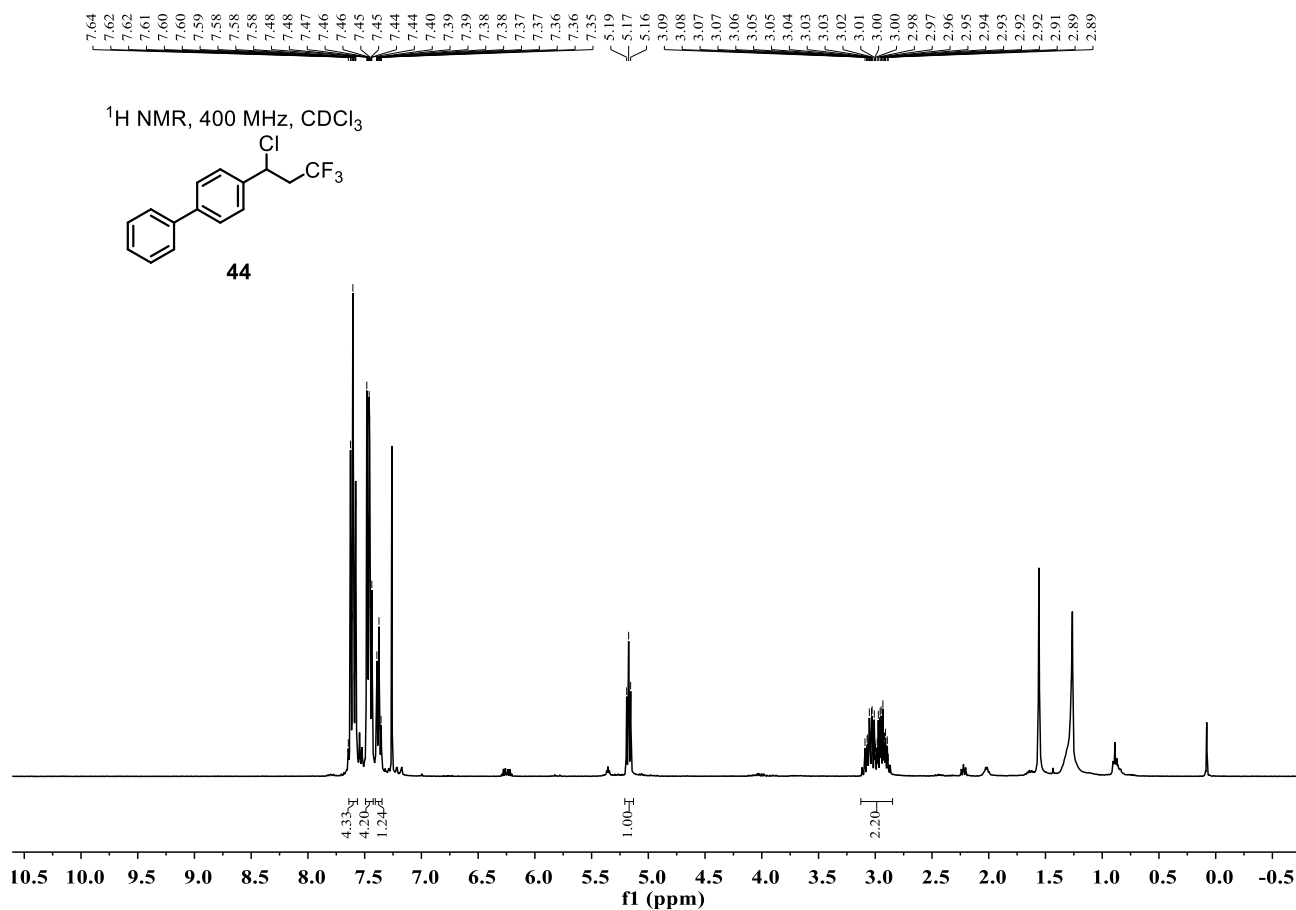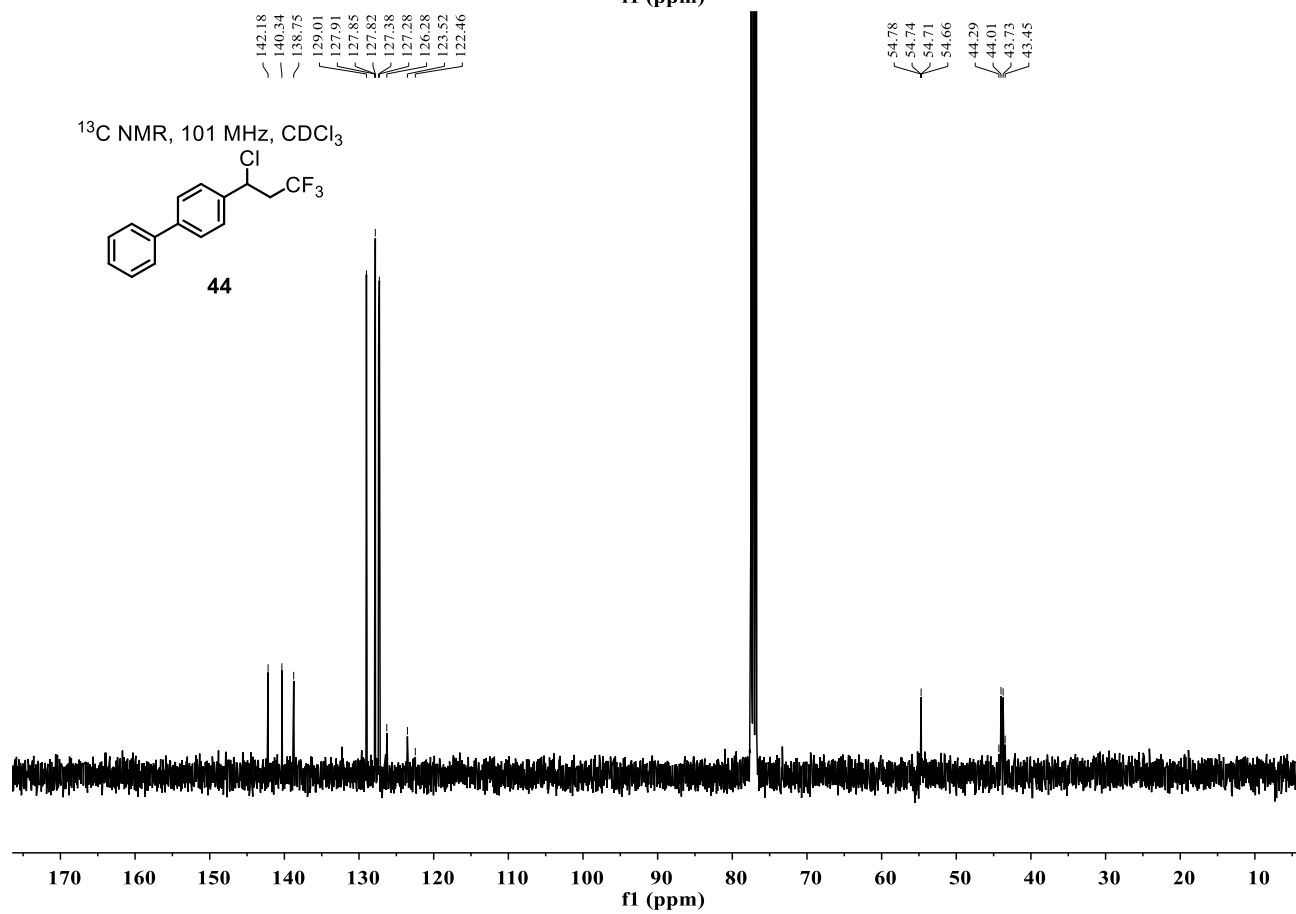

$^{19}\text{F}$  NMR, 376 MHz,  $\text{CDCl}_3$

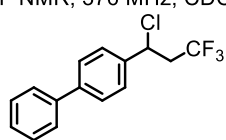

-63.98

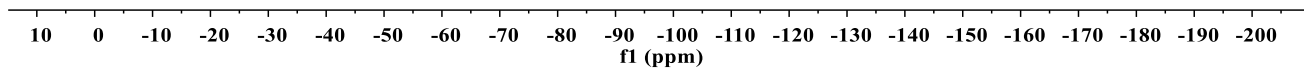

Supplement: d4sc04038d1.pdf [file d4sc04038d1.pdf]
